# Supplementary material
Source: publisher figshare collection journal article supplement (https://aacr.figshare.com/ndownloader/files/39854784)
Supplement: Supplementary file 1 [file 39854784]

## Sheet: IMR5-75_EPZ-6438
	baseMean	log2FoldChange	lfcSE	stat	pvalue	padj
FOS	263.764	2.2453	0.233189	9.62868	6.05022e-22	7.8066e-18
ADCYAP1	194.021	1.93157	0.228498	8.45335	2.83059e-17	1.82616e-13
THSD7A	223.727	1.45015	0.212763	6.81581	9.37355e-12	2.01578e-08
IGFBP3	444.899	1.42723	0.183243	7.78869	6.77058e-15	2.18402e-11
PLCL1	113.469	1.34669	0.254528	5.29093	1.21696e-07	4.36177e-05
FST	194.325	1.32124	0.210321	6.28201	3.34214e-10	3.57752e-07
PRPH	1696.86	1.24391	0.155045	8.02289	1.03288e-15	4.44241e-12
MCART6	31.1991	1.22249	0.293805	4.16091	3.16988e-05	0.00417356
NOTCH2	78.0562	1.19537	0.255382	4.68072	2.85868e-06	0.000667355
TNNT1	63.1628	1.18583	0.272016	4.35941	1.30413e-05	0.0021034
PFKFB2	141.232	1.18176	0.211971	5.57512	2.47363e-08	1.32989e-05
FOXC1	241.12	1.12683	0.22675	4.96946	6.71384e-07	0.000188323
CHD5	105.011	1.12264	0.251031	4.47213	7.74456e-06	0.00144823
COL2A1	313.056	1.10948	0.192852	5.75303	8.76568e-09	6.28353e-06
LOC157627	100.046	1.10928	0.236859	4.6833	2.82286e-06	0.000667355
ACE	62.4162	1.09237	0.277222	3.94041	8.13408e-05	0.00854983
CDH6	409.441	1.08532	0.173933	6.23987	4.37926e-10	4.02244e-07
SCN9A	1135.85	1.08461	0.167804	6.46354	1.0228e-10	1.46636e-07
TSHZ2	145.428	1.07408	0.227666	4.71777	2.38448e-06	0.000580508
CRHR1	358.015	1.05165	0.164098	6.40871	1.46756e-10	1.89359e-07
PDE4D	906.564	1.04893	0.165575	6.33504	2.37273e-10	2.78321e-07
FAM167A	164.115	1.02825	0.200915	5.11781	3.09101e-07	9.72764e-05
HEY1	99.283	1.01868	0.258997	3.93319	8.38266e-05	0.00865292
FAT3	273.645	1.0151	0.188154	5.39504	6.8509e-08	3.04818e-05
SNAP91	137.955	1.01457	0.228995	4.43051	9.40097e-06	0.00170846
FAM163A	46.5883	1.01335	0.278591	3.63743	0.000275376	0.0200745
LOC728392	140.486	1.00773	0.218066	4.6212	3.81526e-06	0.000848764
MDGA1	110.053	1.00579	0.256396	3.92281	8.75227e-05	0.00895826
RAP2B	55.3218	1.00531	0.262857	3.82456	0.000131005	0.0115777
EPHA3	50.5278	0.999056	0.280756	3.55845	0.000373048	0.0234802
GATA2	269.37	0.992887	0.220932	4.49408	6.98721e-06	0.00134708
RAB9B	28.017	0.991861	0.298358	3.3244	0.000886104	0.0448369
TUBB2B	799.174	0.991062	0.159096	6.22932	4.68474e-10	4.02244e-07
VIPR2	60.1515	0.98258	0.255234	3.84973	0.000118249	0.0106697
VGLL3	207.755	0.980333	0.216574	4.52656	5.99525e-06	0.00122788
RBFOX1	54.6538	0.980249	0.27048	3.62411	0.000289956	0.0203332
KIAA1467	75.7708	0.978992	0.250604	3.90653	9.36313e-05	0.00936531
ILDR2	236.363	0.977435	0.202335	4.83077	1.36004e-06	0.000350971
ZCCHC18	41.228	0.976749	0.279065	3.50008	0.000465114	0.0275292
PCDH11X	55.4848	0.975116	0.269858	3.61344	0.000302166	0.0209616
SYT4	278.803	0.969027	0.225156	4.30381	1.67889e-05	0.0025789
GSN	140.339	0.967149	0.231705	4.17405	2.99236e-05	0.00404252
RASAL2	50.5487	0.963325	0.282318	3.4122	0.000644398	0.0355328
APOE	136.456	0.961453	0.247159	3.89002	0.000100235	0.00979798
SUSD5	222.707	0.953491	0.186146	5.12227	3.01884e-07	9.72764e-05
NELL1	610.415	0.948388	0.143166	6.62438	3.48717e-11	6.42784e-08
MYO5B	345.505	0.945785	0.177343	5.33307	9.65651e-08	3.55994e-05
SERPINI1	117.112	0.943189	0.238994	3.94649	7.93051e-05	0.00852728
RERG	443.845	0.938977	0.164564	5.70583	1.15774e-08	7.46917e-06
ZNF467	55.6103	0.932802	0.271469	3.43613	0.000590091	0.0331041
ARNTL	197.029	0.924432	0.201476	4.58831	4.46852e-06	0.000960955
NDRG2	184.036	0.922603	0.189708	4.86328	1.15455e-06	0.000304024
AKNAD1	665.267	0.918315	0.147651	6.21948	4.98791e-10	4.02244e-07
ITGA3	127.082	0.916435	0.249208	3.67739	0.000235635	0.0175745
DIO2	195.182	0.913089	0.230338	3.96413	7.36653e-05	0.00805511
PLEKHA6	146.353	0.905045	0.234277	3.86315	0.000111934	0.0104675
MSX2	264.809	0.9049	0.1901	4.76012	1.93474e-06	0.000489489
SCUBE1	79.1946	0.903701	0.250885	3.60205	0.000315723	0.0214409
NPTX1	238.896	0.897989	0.178854	5.02081	5.14549e-07	0.000150891
MECOM	96.3611	0.896949	0.230901	3.88455	0.000102518	0.0098518
NEGR1	206.382	0.896131	0.212754	4.21204	2.53074e-05	0.00358836
SDK2	75.9812	0.896096	0.268723	3.33464	0.000854091	0.0437315
LPAR1	660.988	0.894006	0.136594	6.54499	5.94987e-11	9.5964e-08
HOMEZ	89.4815	0.893327	0.240918	3.708	0.000208899	0.0161831
ADAMTSL1	173.463	0.890337	0.200445	4.4418	8.92096e-06	0.00164439
NRP1	937.099	0.889175	0.150586	5.90477	3.53143e-09	2.68036e-06
TAGLN2	252.245	0.879528	0.173784	5.06105	4.16952e-07	0.000125115
PPP2R2B	454.465	0.87905	0.160704	5.47	4.50044e-08	2.0739e-05
TP53INP1	1584.23	0.874617	0.166547	5.25147	1.50886e-07	5.1398e-05
TNC	460.26	0.870972	0.152572	5.70858	1.13922e-08	7.46917e-06
KIAA1456	188.323	0.869376	0.208339	4.17288	3.00769e-05	0.00404252
FUCA1	129.7	0.865791	0.221881	3.90206	9.53781e-05	0.00946664
PCLO	136.043	0.864927	0.229393	3.7705	0.00016292	0.0135623
PLXNA2	232.885	0.863872	0.192234	4.49385	6.99481e-06	0.00134708
CHRD	91.7036	0.86194	0.253625	3.39847	0.00067763	0.0367372
SPATA20	449.708	0.861692	0.157177	5.48231	4.19805e-08	2.0062e-05
LOC100294145	354.662	0.859816	0.175562	4.8975	9.70626e-07	0.000266468
SGPP2	140.156	0.849882	0.235888	3.6029	0.000314684	0.0214409
LOC729177	126.61	0.848851	0.221489	3.83248	0.00012686	0.011348
MGAT4A	94.5973	0.841026	0.235293	3.57438	0.000351055	0.0229932
LIMCH1	805.551	0.833389	0.155444	5.36134	8.26069e-08	3.24382e-05
GRIA2	193.885	0.82136	0.223552	3.67414	0.000238652	0.0176973
DUSP2	347.309	0.813984	0.205097	3.96877	7.22432e-05	0.00796713
SLC6A2	629.613	0.813682	0.152131	5.34858	8.86492e-08	3.36424e-05
SCG2	511.515	0.811123	0.192955	4.20369	2.62601e-05	0.00368214
STEAP3	252.641	0.809076	0.189016	4.28046	1.86505e-05	0.00273463
SEL1L3	259.332	0.8076	0.19989	4.04022	5.3402e-05	0.00661999
APC2	203.101	0.807078	0.214934	3.755	0.000173342	0.0143373
NT5E	156.123	0.806148	0.218598	3.68781	0.000226194	0.0170677
NEDD9	136.175	0.798552	0.215548	3.70475	0.000211601	0.0162517
UNC79	147.343	0.798375	0.224568	3.55517	0.000377741	0.0236602
ATCAY	87.0518	0.797606	0.233163	3.42081	0.000624339	0.0347235
CDKN1A	5257.17	0.794747	0.126749	6.27026	3.60441e-10	3.57752e-07
MARCH8	90.7906	0.793631	0.241316	3.28877	0.00100627	0.0485007
KCNJ6	559.425	0.792723	0.162363	4.88242	1.04791e-06	0.00028169
IFI30	127.521	0.788432	0.235616	3.34625	0.000819115	0.0425664
CDH11	696.464	0.787718	0.143048	5.50666	3.65713e-08	1.88752e-05
HDAC9	205.408	0.787649	0.206846	3.8079	0.00014015	0.0120557
STRA6	191.32	0.787208	0.199755	3.94086	8.119e-05	0.00854983
C1orf95	122.509	0.787118	0.220999	3.56164	0.000368542	0.023443
KIF26B	251.188	0.783377	0.174717	4.48368	7.3365e-06	0.0013921
CPS1	153.218	0.783072	0.201655	3.88323	0.000103076	0.0098518
FAM190A	225.252	0.782346	0.184011	4.25164	2.12213e-05	0.00307661
KIAA1239	676.323	0.782235	0.148972	5.25089	1.5137e-07	5.1398e-05
NTN4	170.738	0.777683	0.192583	4.03816	5.38711e-05	0.00661999
BMPR1B	193.493	0.771796	0.20446	3.77481	0.000160132	0.0134168
CADPS	287.12	0.771072	0.188907	4.08175	4.4698e-05	0.0055994
DUSP6	198.573	0.767169	0.211589	3.62575	0.00028813	0.0203332
C4orf34	156.2	0.764815	0.199629	3.83119	0.000127525	0.011348
TP53I3	1506.41	0.761691	0.133859	5.69025	1.2685e-08	7.79404e-06
AGRN	356.224	0.760402	0.180992	4.20129	2.65395e-05	0.00368214
SORL1	186.644	0.758606	0.194516	3.89996	9.62073e-05	0.00947605
MTUS1	141.086	0.757212	0.225984	3.35073	0.000805993	0.0422374
CUX2	244.379	0.75667	0.187905	4.02687	5.65238e-05	0.00669107
KRCC1	99.5106	0.754216	0.221289	3.40829	0.00065372	0.0357413
DGKB	273.933	0.75288	0.189039	3.98268	6.81437e-05	0.00757982
ABAT	378.744	0.742538	0.160667	4.6216	3.8079e-06	0.000848764
LOXL4	226.425	0.739945	0.205793	3.59558	0.000323667	0.0217514
MAGED2	1873.64	0.736817	0.137451	5.36056	8.29621e-08	3.24382e-05
PLXDC2	151.641	0.734267	0.196034	3.74561	0.000179958	0.0145125
PDE1A	306.358	0.733892	0.171011	4.29149	1.77481e-05	0.00266283
LOC100507421	116.678	0.728121	0.221393	3.28881	0.00100612	0.0485007
SLITRK6	194.199	0.725256	0.195627	3.70733	0.000209454	0.0161831
SOCS2	329.51	0.719063	0.166696	4.31361	1.6061e-05	0.00249681
EVI5L	194.828	0.711447	0.197805	3.59671	0.000322273	0.0217514
ACP6	255.666	0.70964	0.177441	3.99929	6.35323e-05	0.00725449
DUSP10	312.635	0.708459	0.179202	3.95341	7.70465e-05	0.00835404
CNTN4	148.723	0.704843	0.197101	3.57605	0.000348822	0.0229635
LOC100190938	142.928	0.703882	0.209602	3.35818	0.000784566	0.0417385
IL13RA1	346.994	0.699595	0.177565	3.93994	8.15027e-05	0.00854983
LLGL2	157.241	0.693417	0.207817	3.33667	0.000847882	0.0435865
ZDHHC23	225.649	0.692981	0.191172	3.6249	0.000289073	0.0203332
METTL7A	673.571	0.692965	0.153415	4.51694	6.27398e-06	0.00126489
DUSP4	551.003	0.692868	0.157425	4.40126	1.07622e-05	0.00187655
ID1	1919.29	0.692776	0.145883	4.74883	2.04593e-06	0.000507667
PTPN3	368.643	0.686839	0.157248	4.36789	1.25455e-05	0.00204904
DCHS1	402.466	0.685019	0.174097	3.93469	8.33027e-05	0.00865292
MSX1	323.547	0.684747	0.198505	3.44951	0.000561605	0.0317824
GFRA1	2353.8	0.676024	0.125755	5.37571	7.62817e-08	3.24382e-05
CHCHD7	171.349	0.674178	0.197448	3.41446	0.000639092	0.0353914
GRIK3	620.607	0.671111	0.147701	4.54371	5.52738e-06	0.00115032
LEPR	660.242	0.670145	0.178814	3.74772	0.000178447	0.0144811
PAIP2B	191.718	0.669364	0.192124	3.48403	0.000493931	0.0287081
FLRT2	185.771	0.664378	0.186067	3.57063	0.000356125	0.0230909
RORB	314.226	0.661075	0.173294	3.81477	0.000136312	0.011884
ID3	1950.23	0.659522	0.151611	4.35009	1.36081e-05	0.00216772
TGFBR2	181.325	0.657737	0.19949	3.29709	0.000976911	0.0479281
EYA4	565.727	0.65397	0.171257	3.81864	0.000134192	0.0117787
MPP3	215.633	0.652354	0.182231	3.57981	0.000343839	0.0227515
MYO6	445.354	0.651824	0.17721	3.67827	0.000234825	0.0175745
PCDH9	224.549	0.651385	0.182965	3.56015	0.000370641	0.023443
C14orf101	208.468	0.64507	0.184214	3.50174	0.000462227	0.0274844
RAB3B	612.13	0.64349	0.166733	3.8594	0.000113667	0.0104675
KAL1	269.144	0.641339	0.193658	3.31172	0.000927253	0.0461944
COL3A1	2591.29	0.63847	0.119062	5.36252	8.20683e-08	3.24382e-05
EPS8	499.689	0.634877	0.151587	4.18822	2.81155e-05	0.0038593
WBP5	241.569	0.63317	0.179119	3.53491	0.000407911	0.0248268
TMEM56	1120.21	0.63079	0.187799	3.35886	0.000782654	0.0417385
JUP	569.097	0.630634	0.16868	3.73865	0.000185013	0.0145732
SLC6A17	283.121	0.626064	0.175448	3.56837	0.000359203	0.023174
PTPRU	1103.52	0.625293	0.142398	4.39117	1.1274e-05	0.00193959
PINK1	441.901	0.62481	0.156096	4.00273	6.26162e-05	0.00721372
LPHN3	325.415	0.624578	0.160738	3.88569	0.000102038	0.0098518
ZSWIM5	452.131	0.62162	0.149684	4.15288	3.28321e-05	0.00423633
CHRNB2	329.642	0.619799	0.174662	3.54855	0.000387354	0.0239653
KLHDC8B	249.602	0.618209	0.188315	3.28285	0.00102765	0.0491101
NRIP3	316.264	0.617612	0.162961	3.78995	0.00015068	0.0128466
APLP2	4915.19	0.617394	0.110568	5.58386	2.35242e-08	1.31971e-05
CHGA	6324.37	0.616793	0.133892	4.60665	4.09204e-06	0.000894908
LRRN3	2108.47	0.61382	0.159082	3.85852	0.000114074	0.0104675
KITLG	449.185	0.613058	0.184967	3.31442	0.000918341	0.0459277
STARD4	1099.92	0.61284	0.158855	3.85786	0.000114386	0.0104675
SESN3	1091.96	0.608643	0.152499	3.99113	6.57597e-05	0.00742654
CD9	470.765	0.608225	0.160692	3.78505	0.00015368	0.0129603
SESN1	785.475	0.605335	0.138435	4.3727	1.22721e-05	0.00203009
JUN	1263.03	0.602809	0.166608	3.61812	0.000296748	0.020697
COL14A1	343.402	0.601968	0.1797	3.34985	0.000808543	0.0422374
GNG2	579.929	0.601858	0.179313	3.35646	0.000789462	0.0417385
HERC5	347.218	0.601001	0.175003	3.43424	0.000594215	0.0331912
WIPI1	497.093	0.596836	0.152214	3.92102	8.81732e-05	0.00895826
GLCE	1055.01	0.590263	0.159785	3.69411	0.000220661	0.0168472
CASD1	495.926	0.58704	0.167599	3.50266	0.000460644	0.0274844
GPC3	483.653	0.585262	0.161258	3.62936	0.000284124	0.0203332
ID2	2422.14	0.583809	0.144898	4.0291	5.59913e-05	0.00669107
DKK3	241.296	0.583425	0.176672	3.30232	0.0009589	0.0474886
HTRA1	416.663	0.571977	0.150963	3.78887	0.000151336	0.0128466
CHODL	429.789	0.570933	0.165396	3.45192	0.000556611	0.0316385
NTNG1	261.39	0.567953	0.168142	3.37782	0.000730628	0.0392804
LYPD6	337.679	0.563743	0.168803	3.33965	0.000838839	0.0432942
ESRRG	571.296	0.560572	0.162886	3.44151	0.000578482	0.0325946
LGR4	893.82	0.548413	0.156801	3.49751	0.000469629	0.0275726
CALCOCO1	462.694	0.547903	0.1586	3.45462	0.00055107	0.031602
GKAP1	617.29	0.539195	0.139753	3.8582	0.000114227	0.0104675
LPPR4	1124.78	0.537811	0.150068	3.58379	0.000338649	0.0225236
FRMD6	698.476	0.537428	0.148125	3.62821	0.00028539	0.0203332
LOC100131564	427.598	0.534547	0.160401	3.33256	0.0008605	0.0438855
CREG1	1067.21	0.534474	0.128916	4.14591	3.38469e-05	0.00432402
RYR2	675.413	0.527315	0.151231	3.48681	0.000488811	0.028539
PNPLA8	531.67	0.525951	0.15189	3.46271	0.000534764	0.0308038
TNIK	568.44	0.519843	0.149263	3.48273	0.000496322	0.0287177
IGFBP5	676.58	0.511997	0.139643	3.66647	0.000245918	0.0181319
RGNEF	935.374	0.511599	0.130935	3.90728	9.33417e-05	0.00936531
ENC1	1602.09	0.511433	0.140886	3.63013	0.000283274	0.0203332
KLHL24	1454.93	0.506888	0.153881	3.29402	0.000987648	0.0482713
FBXO8	1202.82	0.503409	0.137973	3.64862	0.000263658	0.0193294
DQX1	1193.49	0.501471	0.149355	3.35758	0.00078628	0.0417385
C7orf41	1164.49	0.49042	0.137627	3.56341	0.000366069	0.023443
TSPYL2	639.187	0.488019	0.147869	3.30036	0.000965621	0.047555
INSR	677.569	0.463399	0.136305	3.39972	0.000674548	0.0367244
CPE	2575.5	0.456285	0.117619	3.87936	0.000104731	0.00993637
CADM1	1083.12	0.446129	0.131835	3.38399	0.000714408	0.0385691
BTG2	1490.43	0.440773	0.129318	3.40843	0.00065337	0.0357413
SFRP1	1756.65	0.433617	0.13027	3.3286	0.000872843	0.0443398

## Sheet: IMR5-75_DAC
	baseMean	log2FoldChange	lfcSE	stat	pvalue	padj
ACRC	355.037	4.23489	0.204707	20.6876	4.48262e-95	5.78393e-91
COL9A2	171.631	3.43227	0.239711	14.3184	1.68023e-46	1.97091e-43
NEFH	139.026	3.40324	0.242064	14.0593	6.7574e-45	7.26589e-42
TPM2	361.175	3.26657	0.191577	17.0509	3.44041e-65	7.39861e-62
STAT6	119.985	3.23186	0.246166	13.1288	2.25175e-39	1.70908e-36
CCKAR	288.675	3.03764	0.203561	14.9225	2.35131e-50	3.79237e-47
PRPH	1696.86	3.02188	0.151985	19.8827	5.74436e-88	2.47065e-84
SCG2	511.515	2.87532	0.183817	15.6423	3.75024e-55	6.91276e-52
ADCYAP1	194.021	2.78924	0.223045	12.5053	6.98367e-36	4.09592e-33
FOS	263.764	2.78827	0.23188	12.0246	2.63784e-33	1.06363e-30
ZNF772	101.931	2.68697	0.241905	11.1075	1.15307e-28	3.23435e-26
YY2	76.6903	2.61002	0.261003	9.99994	1.52482e-23	2.58878e-21
LINC00470	80.1076	2.60387	0.26149	9.95782	2.33107e-23	3.90621e-21
CDKN1A	5257.17	2.5937	0.12565	20.6423	1.14524e-94	7.38849e-91
AKR1C3	131.399	2.59239	0.228865	11.3271	9.62977e-30	2.8896e-27
GPAT2	150.226	2.57744	0.22541	11.4345	2.81192e-30	1.00784e-27
DUSP2	347.309	2.55156	0.197455	12.9223	3.37131e-38	2.28947e-35
CA5B	184.104	2.54636	0.203911	12.4876	8.72354e-36	4.8939e-33
TRIM59	178.292	2.51711	0.211341	11.9102	1.0469e-32	3.973e-30
DUSP6	198.573	2.48395	0.199483	12.452	1.36439e-35	7.33528e-33
ZNF780B	89.8339	2.47974	0.263438	9.41298	4.82277e-21	6.76393e-19
RGS4	902.161	2.45743	0.17656	13.9184	4.89862e-44	4.86207e-41
TUBA4A	204.101	2.45035	0.215542	11.3683	6.0124e-30	1.93945e-27
SYT4	278.803	2.44249	0.217935	11.2074	3.75116e-29	1.10003e-26
PLCL1	113.469	2.439	0.247071	9.87168	5.52332e-23	8.90842e-21
DBH	103.207	2.43241	0.252717	9.62503	6.26884e-22	9.51609e-20
CSPG4	104.373	2.41904	0.240275	10.0678	7.66723e-24	1.39338e-21
SEL1L3	259.332	2.32093	0.19008	12.2103	2.7399e-34	1.35973e-31
ZNF776	108.966	2.31969	0.239097	9.70188	2.95981e-22	4.71488e-20
MEST	1373.42	2.30021	0.124746	18.4391	6.37947e-76	2.05786e-72
MDGA1	110.053	2.29421	0.247651	9.26387	1.97151e-20	2.54384e-18
ITGA3	127.082	2.27267	0.239273	9.49824	2.13466e-21	3.12995e-19
COL19A1	71.2026	2.26938	0.263014	8.62837	6.22334e-18	6.32281e-16
NEURL	79.7074	2.25989	0.257936	8.76145	1.92752e-18	2.08998e-16
DKK1	340.253	2.23797	0.299133	7.48151	7.34716e-14	4.57973e-12
COL14A1	343.402	2.22893	0.171174	13.0214	9.24119e-39	6.62439e-36
KLHDC8A	124.695	2.20213	0.240889	9.14166	6.14994e-20	7.70414e-18
TP53INP1	1584.23	2.18593	0.164983	13.2495	4.54466e-40	3.66498e-37
SYTL1	77.7489	2.17836	0.263364	8.27129	1.32518e-16	1.16318e-14
PYY	266.447	2.17713	0.209222	10.4058	2.33168e-25	5.01427e-23
METTL7A	673.571	2.15285	0.148668	14.4809	1.6005e-47	2.29458e-44
INPP5D	68.1947	2.15275	0.268753	8.01012	1.14597e-15	8.90749e-14
SPHK1	340.833	2.15271	0.178852	12.0363	2.29053e-33	9.53379e-31
COL1A1	174.353	2.14507	0.222386	9.64571	5.12546e-22	7.87308e-20
RBM44	58.9615	2.13494	0.273475	7.80672	5.86938e-15	4.18413e-13
ACTA2	195.275	2.13419	0.200246	10.6578	1.60328e-26	3.83095e-24
VGF	191.188	2.1338	0.228631	9.33296	1.0295e-20	1.39828e-18
CCDC144B	60.5662	2.13051	0.270308	7.88177	3.22771e-15	2.40735e-13
DIO2	195.182	2.12339	0.223913	9.48309	2.46858e-21	3.57888e-19
FST	194.325	2.11727	0.204518	10.3525	4.07681e-25	8.48437e-23
PARM1	170.957	2.10663	0.20542	10.2552	1.12139e-24	2.15961e-22
CORO6	183.299	2.09878	0.207086	10.1348	3.87009e-24	7.13368e-22
WFIKKN2	403.13	2.09809	0.174112	12.0502	1.93489e-33	8.32198e-31
PDE4D	906.564	2.08803	0.163235	12.7915	1.82799e-37	1.17933e-34
SPATA18	324.635	2.04512	0.170955	11.9629	5.55916e-33	2.17363e-30
HEY1	99.283	2.03747	0.251288	8.10812	5.14098e-16	4.2251e-14
EPHA2	360.459	2.03644	0.164888	12.3504	4.84582e-35	2.50102e-32
CATSPERG	91.4139	2.02832	0.245949	8.24691	1.62547e-16	1.40762e-14
CALB1	90.327	2.02466	0.24773	8.17285	3.01187e-16	2.54001e-14
ABCA9	81.985	2.0182	0.252818	7.98283	1.43017e-15	1.09842e-13
COL3A1	2591.29	2.01749	0.116851	17.2656	8.54334e-67	2.2047e-63
PROCR	58.9463	2.013	0.27939	7.20499	5.80461e-13	3.20072e-11
COL2A1	313.056	1.99427	0.188124	10.6008	2.95334e-26	6.80482e-24
DTNA	148.596	1.97908	0.216414	9.14488	5.96984e-20	7.55185e-18
ARC	120.837	1.97492	0.228179	8.65513	4.92344e-18	5.20714e-16
SCN9A	1135.85	1.96719	0.166476	11.8167	3.20146e-32	1.18024e-29
ZNF10	287.297	1.95725	0.182776	10.7085	9.28821e-27	2.26124e-24
NTNG2	184.087	1.95267	0.218601	8.93258	4.1619e-19	4.71062e-17
RGAG4	58.1846	1.95015	0.271411	7.18522	6.71009e-13	3.66866e-11
GRM4	97.0801	1.94743	0.242683	8.02458	1.01872e-15	8.06416e-14
PLEKHA6	146.353	1.94691	0.225464	8.63511	5.86713e-18	6.00822e-16
COL12A1	115.422	1.94407	0.231853	8.38491	5.07643e-17	4.67865e-15
TCP11L2	66.2013	1.93835	0.265722	7.29468	2.99374e-13	1.72447e-11
SLC35D2	39.7365	1.93791	0.286358	6.76744	1.31082e-11	5.9138e-10
LOXL3	239.137	1.93545	0.189579	10.2092	1.80352e-24	3.42218e-22
TNNI1	137.078	1.93365	0.233845	8.26894	1.35156e-16	1.17832e-14
MYO5B	345.505	1.91813	0.172001	11.1518	7.01671e-29	2.01193e-26
MYO15B	221.776	1.91778	0.206731	9.27667	1.74864e-20	2.27906e-18
KCNJ2	94.3436	1.90639	0.244933	7.78332	7.06448e-15	4.92719e-13
SERPINI1	117.112	1.90295	0.23079	8.24539	1.64628e-16	1.41613e-14
TGFB2	278.543	1.89956	0.183691	10.341	4.59585e-25	9.41274e-23
JAG1	125.649	1.89036	0.218892	8.63601	5.821e-18	6.00822e-16
S100A4	70.4394	1.8882	0.263096	7.17683	7.1347e-13	3.86802e-11
FAM133A	50.4375	1.88776	0.274691	6.87229	6.31815e-12	3.01937e-10
FDXR	1704.36	1.87338	0.149289	12.5487	4.04168e-36	2.48333e-33
RASAL2	50.5487	1.85141	0.275499	6.72021	1.8146e-11	8.04597e-10
CHGA	6324.37	1.85074	0.133361	13.8777	8.65002e-44	7.97223e-41
SV2B	68.9251	1.8486	0.268013	6.8974	5.29617e-12	2.55954e-10
HERC5	347.218	1.84216	0.168288	10.9465	6.9057e-28	1.89583e-25
PPP1R17	66.4082	1.83381	0.26666	6.87695	6.11486e-12	2.93309e-10
ANKRD65	84.1915	1.83007	0.256151	7.14451	9.03146e-13	4.77594e-11
ZBTB7B	636.007	1.82983	0.161305	11.3439	7.95049e-30	2.44251e-27
ART5	120.248	1.82807	0.233528	7.82805	4.95499e-15	3.6121e-13
ZNF506	54.7293	1.82745	0.269686	6.7762	1.23377e-11	5.64517e-10
DDB2	138.891	1.8231	0.210773	8.64959	5.16861e-18	5.37827e-16
BTG2	1490.43	1.82191	0.126667	14.3835	6.57208e-47	8.47996e-44
LOC643401	465.935	1.82066	0.171371	10.6241	2.3019e-26	5.40025e-24
CHGB	806.237	1.81867	0.160167	11.3548	7.01603e-30	2.208e-27
ILDR2	236.363	1.81623	0.197957	9.17488	4.52083e-20	5.77547e-18
CLCN4	75.2543	1.81287	0.253225	7.15913	8.11914e-13	4.32898e-11
EXOC3L1	87.2129	1.80311	0.249273	7.23346	4.70851e-13	2.65301e-11
DEM1	62.73	1.80305	0.261022	6.90764	4.92771e-12	2.39933e-10
FBLN2	192.825	1.80209	0.199405	9.03732	1.60553e-19	1.91816e-17
RHBG	296.12	1.80177	0.175447	10.2696	9.66166e-25	1.91791e-22
OPTN	246.532	1.80021	0.179421	10.0334	1.08679e-23	1.94762e-21
BBC3	221.657	1.79899	0.200573	8.96925	2.98552e-19	3.47046e-17
THSD7A	223.727	1.79752	0.210792	8.52743	1.49631e-17	1.47381e-15
JUP	569.097	1.79256	0.164629	10.8885	1.30838e-27	3.51709e-25
PGF	491.708	1.7888	0.17878	10.0056	1.43981e-23	2.47705e-21
MLH3	71.8607	1.78311	0.254276	7.01251	2.34072e-12	1.19377e-10
BNC1	63.2522	1.7821	0.270786	6.58123	4.66573e-11	1.942e-09
NOTCH2	78.0562	1.78146	0.251057	7.09582	1.28583e-12	6.71705e-11
HCG11	100.821	1.78101	0.23693	7.51703	5.60327e-14	3.59696e-12
KIAA1324L	324.594	1.765	0.168712	10.4617	1.29576e-25	2.88263e-23
SGPP2	140.156	1.76024	0.229653	7.66479	1.7912e-14	1.21005e-12
LUM	275.703	1.76003	0.19927	8.83238	1.02469e-18	1.13005e-16
PARP9	74.5406	1.74868	0.262748	6.65536	2.82606e-11	1.22777e-09
DUSP4	551.003	1.74448	0.153323	11.3778	5.39607e-30	1.78527e-27
TCEA3	53.852	1.74392	0.274282	6.35811	2.04252e-10	7.66122e-09
EFNA1	63.7734	1.74362	0.27683	6.2985	3.00544e-10	1.06244e-08
UNC79	147.343	1.74205	0.217873	7.99573	1.28807e-15	9.95211e-14
RPP25	132.873	1.73962	0.223114	7.79699	6.34022e-15	4.44608e-13
DUSP10	312.635	1.73934	0.173834	10.0058	1.43776e-23	2.47705e-21
HDAC9	205.408	1.73807	0.200938	8.64981	5.15837e-18	5.37827e-16
TNFAIP2	83.9636	1.72786	0.246309	7.01499	2.29974e-12	1.17752e-10
NT5E	156.123	1.71834	0.210851	8.14954	3.65298e-16	3.02143e-14
LOC286467	181.679	1.71157	0.201664	8.48723	2.11627e-17	2.0531e-15
LMNA	1594.67	1.71112	0.150341	11.3816	5.1664e-30	1.75426e-27
COL9A1	36.1068	1.70167	0.289677	5.87436	4.2447e-09	1.17806e-07
CLSTN3	317.162	1.70076	0.19197	8.85952	8.03614e-19	8.93882e-17
NEUROD2	54.4716	1.69554	0.278958	6.07812	1.21597e-09	3.86445e-08
GPC3	483.653	1.69185	0.15645	10.814	2.95647e-27	7.47987e-25
LOXL4	226.425	1.68988	0.200053	8.44716	2.98465e-17	2.87395e-15
OSBPL10	119.534	1.686	0.224697	7.50344	6.21662e-14	3.95138e-12
GJA1	587.827	1.68533	0.166172	10.142	3.59489e-24	6.72245e-22
KCNC4	114.045	1.68132	0.225403	7.45918	8.70606e-14	5.37485e-12
PTCH2	45.4456	1.67999	0.281009	5.9784	2.25338e-09	6.73041e-08
CHODL	429.789	1.67046	0.159978	10.4418	1.598e-25	3.49474e-23
SLC44A3	188.225	1.66899	0.200739	8.3142	9.23704e-17	8.16339e-15
LGR4	893.82	1.66882	0.154019	10.8351	2.34612e-27	6.17795e-25
PCLO	136.043	1.6667	0.223817	7.44669	9.57133e-14	5.85303e-12
SHISA2	189.458	1.66509	0.197643	8.4247	3.61671e-17	3.43136e-15
SPRY4	40.0653	1.6612	0.285109	5.82654	5.65888e-09	1.52435e-07
FSIP2	75.5504	1.65226	0.263035	6.28151	3.35303e-10	1.18208e-08
SEMA3E	64.9975	1.64444	0.259099	6.34677	2.19879e-10	8.16004e-09
ACSL6	76.8885	1.64395	0.250347	6.56669	5.14452e-11	2.12076e-09
H19	431.059	1.64161	0.171817	9.55446	1.24227e-21	1.86384e-19
ENPP2	624.215	1.63585	0.163434	10.0092	1.38841e-23	2.45406e-21
CCDC144C	52.6391	1.63528	0.276564	5.91286	3.36213e-09	9.5977e-08
CLU	472.874	1.63136	0.183067	8.91127	5.045e-19	5.66049e-17
MSX1	323.547	1.63022	0.19358	8.42146	3.71809e-17	3.47641e-15
PLK3	272.737	1.62741	0.188745	8.62227	6.56414e-18	6.61696e-16
TCIRG1	51.3955	1.62451	0.271323	5.98735	2.13282e-09	6.42985e-08
SFXN3	242.992	1.61839	0.179598	9.0112	2.03813e-19	2.39073e-17
SERINC2	235.689	1.61638	0.210985	7.66112	1.84322e-14	1.2387e-12
SNAP91	137.955	1.61228	0.224771	7.17298	7.33836e-13	3.92891e-11
KCND2	213.285	1.61182	0.197608	8.15666	3.44414e-16	2.86708e-14
IGFBP3	444.899	1.61019	0.182414	8.8271	1.07428e-18	1.1747e-16
C4orf32	97.8445	1.60775	0.251907	6.3823	1.7445e-10	6.65954e-09
PTPRN	290.223	1.6049	0.190529	8.42337	3.65802e-17	3.44522e-15
GCH1	318.707	1.59591	0.164693	9.69018	3.31936e-22	5.22313e-20
CRABP2	682.114	1.58908	0.159973	9.93339	2.97944e-23	4.92868e-21
SH3PXD2A	261.596	1.57901	0.196248	8.04598	8.55599e-16	6.81469e-14
ABCB1	63.617	1.57832	0.270257	5.84007	5.21792e-09	1.41146e-07
CHRD	91.7036	1.57313	0.24816	6.33919	2.30975e-10	8.52669e-09
HPSE	86.0395	1.56926	0.249935	6.27869	3.4143e-10	1.2004e-08
NNAT	11356.2	1.56349	0.129631	12.0611	1.69597e-33	7.5459e-31
MYO5A	78.137	1.56169	0.260408	5.99709	2.00891e-09	6.11343e-08
CPE	2575.5	1.55909	0.116286	13.4074	5.46878e-41	4.70425e-38
TSPYL2	639.187	1.5554	0.143832	10.814	2.95512e-27	7.47987e-25
PLK2	1047.48	1.55516	0.128379	12.1138	8.92402e-34	4.11238e-31
NMRAL1	56.8219	1.54813	0.273553	5.65933	1.51963e-08	3.77073e-07
SESN1	785.475	1.54767	0.135592	11.4142	3.55304e-30	1.23905e-27
TGFB3	174.672	1.54715	0.202204	7.65144	1.98749e-14	1.32188e-12
POLD4	108.757	1.54212	0.232185	6.64178	3.09908e-11	1.33737e-09
PDZD7	39.8966	1.53817	0.288183	5.33746	9.42562e-08	1.98399e-06
PPM1J	34.51	1.53695	0.290694	5.28719	1.24209e-07	2.52389e-06
TOB1	501.212	1.53055	0.162229	9.43448	3.92949e-21	5.57167e-19
NHLH2	336.721	1.53026	0.164055	9.32778	1.08112e-20	1.45309e-18
S100A13	111.698	1.52606	0.230304	6.62628	3.44252e-11	1.46693e-09
ETV5	302.992	1.52479	0.167627	9.09632	9.34473e-20	1.14833e-17
SIX1	213.05	1.52177	0.189776	8.01876	1.06816e-15	8.40391e-14
STRA6	191.32	1.51938	0.194388	7.81624	5.44265e-15	3.92327e-13
CXXC5	277.424	1.50057	0.178227	8.41944	3.78304e-17	3.51169e-15
NEFM	1630.19	1.4991	0.13982	10.7217	8.05515e-27	1.99876e-24
GPR56	62.9515	1.49746	0.270314	5.53969	3.03013e-08	7.1739e-07
MTUS1	141.086	1.49652	0.219896	6.80557	1.00648e-11	4.70528e-10
APOE	136.456	1.4882	0.242687	6.13219	8.66756e-10	2.83133e-08
SLC27A2	101.252	1.48718	0.231698	6.41861	1.37522e-10	5.34472e-09
CDKN1C	227.812	1.48578	0.218348	6.80465	1.01296e-11	4.71848e-10
MAN1C1	52.1413	1.48051	0.27178	5.44745	5.10973e-08	1.15668e-06
LOC375295	111.128	1.47974	0.228486	6.47627	9.40175e-11	3.76741e-09
TMBIM1	70.6445	1.47868	0.252188	5.86341	4.53463e-09	1.25022e-07
FAS	127.766	1.4776	0.211983	6.97038	3.16087e-12	1.58695e-10
KIAA1598	229.176	1.4731	0.190197	7.74512	9.5493e-15	6.55397e-13
C1orf228	94.8226	1.47292	0.238805	6.16786	6.92212e-10	2.31389e-08
GGT1	47.5642	1.47196	0.282743	5.20598	1.92972e-07	3.74988e-06
ORAI3	62.0185	1.47004	0.257203	5.7155	1.09382e-08	2.76737e-07
LIMCH1	805.551	1.4635	0.153871	9.51117	1.88523e-21	2.79599e-19
ARID5B	63.9293	1.46031	0.27467	5.31661	1.05716e-07	2.19654e-06
INSRR	52.7219	1.45962	0.27854	5.24025	1.6036e-07	3.18639e-06
MPZ	72.029	1.45871	0.251473	5.80067	6.60518e-09	1.75003e-07
GRASP	111.344	1.45851	0.235497	6.19331	5.8913e-10	1.99516e-08
PCDH7	83.3274	1.45778	0.248162	5.87433	4.24552e-09	1.17806e-07
ACVR1C	86.3186	1.45189	0.249313	5.82357	5.76028e-09	1.54844e-07
DRAM1	143.593	1.45033	0.229623	6.31613	2.68203e-10	9.6396e-09
MDGA2	47.9173	1.44728	0.272146	5.31804	1.0489e-07	2.18291e-06
YPEL2	452.81	1.4445	0.167782	8.60938	7.3454e-18	7.3471e-16
CDH6	409.441	1.44238	0.172428	8.36512	6.00528e-17	5.41861e-15
NDRG1	131.262	1.4417	0.217132	6.63976	3.14189e-11	1.35133e-09
IFI44	44.1284	1.44076	0.286569	5.02762	4.96604e-07	8.75366e-06
SESN2	853.348	1.43978	0.139402	10.3283	5.24954e-25	1.05836e-22
COL22A1	50.8967	1.43859	0.276665	5.19976	1.99549e-07	3.86603e-06
CHD5	105.011	1.43526	0.248259	5.78128	7.41337e-09	1.94816e-07
PGPEP1	473.696	1.42598	0.153352	9.29879	1.42054e-20	1.87159e-18
DEPTOR	69.2549	1.42591	0.255292	5.5854	2.33165e-08	5.63396e-07
CCDC149	66.8612	1.4245	0.257629	5.52929	3.21532e-08	7.50223e-07
MFSD6	123.347	1.42001	0.228962	6.20193	5.57732e-10	1.8946e-08
FAM167A	164.115	1.41991	0.197929	7.17381	7.29392e-13	3.92139e-11
SYNGR3	34.457	1.41228	0.291435	4.84594	1.26015e-06	1.97807e-05
CDHR1	90.1407	1.40714	0.230002	6.11794	9.47937e-10	3.08092e-08
PLXNA2	232.885	1.40676	0.189082	7.43993	1.00741e-13	6.13143e-12
ZNF549	99.9258	1.39889	0.234585	5.96325	2.47264e-09	7.28412e-08
PCDHB11	65.1683	1.39775	0.25741	5.43005	5.63391e-08	1.26061e-06
RUNDC3A	329.627	1.39594	0.180225	7.74551	9.52017e-15	6.55397e-13
XKR7	51.5149	1.39573	0.280986	4.96727	6.7903e-07	1.13491e-05
MAP6	202.253	1.39245	0.200301	6.95179	3.60682e-12	1.79686e-10
LPPR4	1124.78	1.39162	0.148314	9.38296	6.41485e-21	8.90008e-19
RFTN1	220.19	1.39115	0.184909	7.52344	5.3353e-14	3.44207e-12
FAM212B	702.35	1.39072	0.135594	10.2565	1.10685e-24	2.15961e-22
LEPR	660.242	1.3872	0.17718	7.82931	4.9055e-15	3.59635e-13
PYGL	883.2	1.38331	0.130918	10.5663	4.27144e-26	9.6692e-24
FAM84B	441.2	1.38108	0.15453	8.9373	3.98784e-19	4.55354e-17
ARHGAP4	60.9009	1.38092	0.270102	5.11258	3.17782e-07	5.87442e-06
FUCA1	129.7	1.37917	0.217308	6.34663	2.2008e-10	8.16004e-09
GALNTL6	42.8591	1.37844	0.281387	4.89872	9.6464e-07	1.5481e-05
RRM2B	1309.31	1.3777	0.147141	9.36312	7.74126e-21	1.06261e-18
IER3	98.3258	1.37581	0.232334	5.92169	3.1865e-09	9.19808e-08
DYRK1B	197.521	1.36932	0.206293	6.63774	3.1854e-11	1.36549e-09
GSTO2	103.017	1.36885	0.233598	5.85986	4.63258e-09	1.27179e-07
FAM110B	216.223	1.3647	0.186448	7.31948	2.48928e-13	1.45996e-11
LRP10	157.119	1.36427	0.21146	6.45169	1.10611e-10	4.37794e-09
MVP	243.962	1.36273	0.199506	6.83053	8.45989e-12	3.99846e-10
NAV2	159.593	1.36156	0.211214	6.44636	1.1457e-10	4.50702e-09
LACC1	58.3644	1.35924	0.267786	5.07585	3.85776e-07	6.9911e-06
FRMD3	73.9545	1.35659	0.252545	5.37169	7.80028e-08	1.68989e-06
CADPS	287.12	1.35365	0.185869	7.28286	3.26824e-13	1.87422e-11
PRSS23	102.36	1.35191	0.235941	5.72984	1.00523e-08	2.55323e-07
PIK3CD	74.9178	1.35057	0.252473	5.34936	8.8266e-08	1.87627e-06
SYTL2	66.7394	1.35052	0.254265	5.31145	1.08754e-07	2.25603e-06
MYO6	445.354	1.34636	0.174422	7.71902	1.1723e-14	7.96118e-13
KCNV2	38.9997	1.346	0.290642	4.63113	3.63669e-06	4.92384e-05
KIAA1467	75.7708	1.3442	0.247553	5.42994	5.63725e-08	1.26061e-06
BOLA1	159.616	1.33494	0.205197	6.50565	7.73594e-11	3.12906e-09
GRIA2	193.885	1.33294	0.220609	6.0421	1.52117e-09	4.74096e-08
SEMA3C	72.1175	1.3325	0.263665	5.05377	4.33181e-07	7.76296e-06
CRABP1	63.7434	1.33063	0.265879	5.00464	5.59656e-07	9.71903e-06
RET	65.5273	1.32871	0.27066	4.90915	9.14731e-07	1.4809e-05
IRAK2	55.3857	1.327	0.272831	4.86381	1.15145e-06	1.8252e-05
ABCA6	81.9389	1.32592	0.248256	5.34095	9.24612e-08	1.94939e-06
KY	87.5207	1.32574	0.24644	5.37958	7.46616e-08	1.63005e-06
TM7SF2	180.694	1.32112	0.21507	6.14272	8.11189e-10	2.65654e-08
FABP3	62.8683	1.31913	0.260257	5.06858	4.00795e-07	7.23281e-06
EML6	278.955	1.31714	0.175769	7.49359	6.70155e-14	4.23873e-12
PPP1R16B	97.8382	1.31056	0.225348	5.81574	6.03673e-09	1.61937e-07
EPHA3	50.5278	1.30918	0.278241	4.70521	2.5361e-06	3.59188e-05
FRMD6	698.476	1.30352	0.145813	8.93972	3.90166e-19	4.49492e-17
PLEKHH3	870.059	1.30334	0.176802	7.37175	1.68399e-13	9.94772e-12
APC2	203.101	1.29783	0.212038	6.12075	9.31357e-10	3.03467e-08
RNF112	124.66	1.29643	0.213154	6.0821	1.18622e-09	3.79795e-08
GFRA1	2353.8	1.29527	0.124992	10.3628	3.66085e-25	7.7436e-23
MIR137HG	84.4768	1.29524	0.242054	5.35103	8.74566e-08	1.86521e-06
KIFC2	168.67	1.29503	0.21688	5.97119	2.35533e-09	7.01865e-08
EPHX2	323.644	1.29485	0.179076	7.23075	4.80326e-13	2.69463e-11
ZNF880	88.0295	1.29434	0.238855	5.41892	5.99595e-08	1.3362e-06
ADAMTSL2	55.4068	1.29325	0.275917	4.6871	2.77107e-06	3.8738e-05
FBN1	59.3322	1.28969	0.262927	4.90514	9.33619e-07	1.5077e-05
PALMD	136.846	1.28833	0.211894	6.08008	1.20126e-09	3.83661e-08
NEDD9	136.175	1.284	0.211284	6.07715	1.2234e-09	3.87849e-08
FAM19A2	160.31	1.28153	0.195871	6.5427	6.04173e-11	2.47481e-09
AGPAT9	48.5769	1.2814	0.277899	4.61102	4.00701e-06	5.36889e-05
MIAT	693.251	1.28007	0.158912	8.0552	7.93516e-16	6.35947e-14
DNAJC6	740.866	1.27812	0.140075	9.12453	7.2045e-20	8.93842e-18
PARVA	529.284	1.27726	0.161274	7.91981	2.37872e-15	1.78445e-13
DDR1	539.382	1.27719	0.153381	8.3269	8.29867e-17	7.38467e-15
BMF	202.121	1.27556	0.191113	6.67439	2.48258e-11	1.08955e-09
LONRF2	57.5834	1.27543	0.26636	4.78837	1.68139e-06	2.53743e-05
PPIC	129.831	1.27514	0.219713	5.80366	6.4883e-09	1.728e-07
SDK2	75.9812	1.27311	0.265954	4.78695	1.69333e-06	2.54651e-05
PHLDA3	729.09	1.27156	0.163047	7.79871	6.25412e-15	4.40967e-13
STARD4	1099.92	1.27088	0.157657	8.06104	7.56488e-16	6.1006e-14
TTC39A	577.41	1.26839	0.152215	8.33292	7.88755e-17	7.06758e-15
CHRND	65.0394	1.26731	0.254872	4.97233	6.61528e-07	1.10997e-05
BCAN	85.8988	1.26499	0.257965	4.90375	9.40247e-07	1.51461e-05
PGM5	110.897	1.26293	0.224575	5.62362	1.86998e-08	4.6223e-07
DEPDC7	351.132	1.26089	0.174686	7.21808	5.2728e-13	2.93254e-11
TIGD7	228.398	1.25848	0.181183	6.9459	3.76055e-12	1.85909e-10
RHCE	67.559	1.25651	0.260143	4.83006	1.36495e-06	2.10669e-05
ARHGAP27	71.7733	1.25477	0.257339	4.87594	1.08291e-06	1.72931e-05
SLC43A2	216.962	1.25235	0.193815	6.46157	1.0362e-10	4.13935e-09
NRXN1	83.3934	1.24715	0.242599	5.1408	2.73565e-07	5.18327e-06
ELL2	222.199	1.2445	0.193042	6.44679	1.14242e-10	4.50702e-09
FAT4	299	1.24433	0.178894	6.95568	3.50872e-12	1.75477e-10
HOXD10	84.1578	1.24236	0.252677	4.91679	8.79727e-07	1.43141e-05
REPS2	55.201	1.23977	0.266651	4.64941	3.32886e-06	4.57426e-05
TOM1L1	436.775	1.23911	0.155298	7.97892	1.47617e-15	1.12704e-13
MXD4	1487.11	1.23811	0.165412	7.48497	7.15613e-14	4.48231e-12
WDR78	191.641	1.23762	0.203203	6.09059	1.12494e-09	3.62879e-08
KITLG	449.185	1.23655	0.183006	6.75688	1.40996e-11	6.3169e-10
MMP11	183.062	1.23545	0.203358	6.07528	1.23775e-09	3.90482e-08
C1orf226	52.856	1.23504	0.268357	4.60223	4.17997e-06	5.56981e-05
SULF1	39.4712	1.23281	0.284037	4.34032	1.42273e-05	0.000164052
GYLTL1B	82.8467	1.23235	0.243003	5.07134	3.95027e-07	7.1387e-06
LGALS3BP	378.396	1.23182	0.181896	6.77212	1.26913e-11	5.76606e-10
FZD7	205.907	1.23008	0.18564	6.62618	3.44477e-11	1.46693e-09
RELB	53.2111	1.22831	0.264927	4.63642	3.54496e-06	4.81987e-05
HOPX	79.9267	1.22389	0.252815	4.84104	1.29159e-06	2.01516e-05
NPR3	48.4061	1.22344	0.282159	4.33598	1.4511e-05	0.000167025
LINC00086	83.0174	1.21972	0.246392	4.95034	7.40833e-07	1.22081e-05
FAM210B	507.611	1.2155	0.142859	8.50838	1.76374e-17	1.72405e-15
SEMA3B	114.086	1.21409	0.22207	5.46717	4.57282e-08	1.04062e-06
LOC100126784	40.0369	1.21315	0.28944	4.19135	2.77298e-05	0.000299663
COL5A2	176.963	1.21284	0.19668	6.16657	6.97851e-10	2.32671e-08
SNCAIP	33.15	1.21276	0.29427	4.12126	3.76814e-05	0.000390838
TMEM87B	162.121	1.21272	0.203297	5.96526	2.44241e-09	7.22562e-08
SESN3	1091.96	1.21216	0.151295	8.01191	1.12939e-15	8.83185e-14
STEAP3	252.641	1.21216	0.186699	6.49256	8.43913e-11	3.39222e-09
C11orf96	401.258	1.21109	0.168812	7.1742	7.27326e-13	3.92139e-11
LOC728392	140.486	1.2109	0.216206	5.60069	2.13495e-08	5.20743e-07
COBLL1	149.489	1.2109	0.20865	5.80348	6.49522e-09	1.728e-07
NEB	130.702	1.20759	0.225052	5.36584	8.05728e-08	1.73272e-06
GRIN2C	42.7076	1.20588	0.282775	4.26446	2.00386e-05	0.00022386
TP53I3	1506.41	1.20501	0.133124	9.05176	1.4068e-19	1.71245e-17
CHL1	74.0648	1.20458	0.249467	4.82863	1.37474e-06	2.11675e-05
PTPRU	1103.52	1.20415	0.141179	8.52926	1.47287e-17	1.46188e-15
HPCA	577.576	1.20185	0.164216	7.31874	2.50307e-13	1.4614e-11
IRF9	148.293	1.20034	0.202237	5.93534	2.93238e-09	8.48352e-08
MAL2	162.584	1.19784	0.209877	5.70732	1.14766e-08	2.89224e-07
IGSF1	81.7324	1.19718	0.246015	4.8663	1.13708e-06	1.80464e-05
ELFN1	133.584	1.19699	0.231446	5.17182	2.31825e-07	4.43803e-06
GKAP1	617.29	1.1969	0.137222	8.72236	2.72462e-18	2.92965e-16
KCTD12	792.864	1.19641	0.172116	6.95116	3.62297e-12	1.79797e-10
FBXO32	58.801	1.19529	0.272166	4.39175	1.12442e-05	0.000133842
ZSCAN18	200.419	1.19433	0.198521	6.01616	1.786e-09	5.51311e-08
MAP1LC3A	172.693	1.19331	0.207288	5.75675	8.57478e-09	2.20689e-07
ACOT11	148.773	1.19226	0.205936	5.78946	7.06128e-09	1.85942e-07
CALCOCO1	462.694	1.19165	0.155692	7.65389	1.94996e-14	1.30365e-12
HAPLN2	34.5717	1.19163	0.292038	4.0804	4.49589e-05	0.000454271
ZDHHC23	225.649	1.18752	0.188073	6.31412	2.71709e-10	9.73849e-09
CHRNB2	329.642	1.18564	0.171627	6.90824	4.9069e-12	2.39825e-10
DLK1	111.507	1.18419	0.247374	4.78707	1.69235e-06	2.54651e-05
MERTK	114.566	1.18201	0.218758	5.40329	6.54283e-08	1.44558e-06
GRIK2	131.444	1.1819	0.226931	5.2082	1.90677e-07	3.7221e-06
LRRK2	65.7879	1.18039	0.265854	4.44	8.9957e-06	0.000110544
CNKSR3	113.88	1.1802	0.23131	5.10222	3.35688e-07	6.18769e-06
PROKR1	71.7583	1.17998	0.249007	4.73876	2.1503e-06	3.14017e-05
FBXL13	64.6285	1.17968	0.259817	4.54042	5.61428e-06	7.29517e-05
WIPI1	497.093	1.17883	0.149693	7.87497	3.40814e-15	2.52732e-13
GSN	140.339	1.17835	0.229758	5.12868	2.91788e-07	5.46436e-06
CHRM4	42.4878	1.17613	0.283985	4.14154	3.44976e-05	0.000362183
CCNG2	468.171	1.17574	0.171316	6.86296	6.74481e-12	3.21137e-10
FBLIM1	98.0432	1.17175	0.234295	5.00117	5.69848e-07	9.86947e-06
DACT3	219.169	1.17083	0.187972	6.22876	4.70145e-10	1.62635e-08
MBOAT1	100.43	1.17078	0.225149	5.20003	1.99257e-07	3.86603e-06
KCNJ6	559.425	1.16808	0.161025	7.25398	4.04687e-13	2.3003e-11
ZMAT3	433.894	1.16728	0.173838	6.71476	1.8837e-11	8.32375e-10
PRSS35	62.3186	1.16545	0.262296	4.44324	8.86132e-06	0.000109101
PRUNE2	299.568	1.1649	0.197693	5.89245	3.80509e-09	1.07669e-07
ARHGAP31	61.2142	1.1646	0.268206	4.3422	1.41065e-05	0.000163097
DMD	142.803	1.16298	0.208255	5.58439	2.34528e-08	5.6563e-07
PLAT	62.9566	1.16072	0.269058	4.31402	1.60316e-05	0.000182735
SLC44A5	407.173	1.16003	0.165986	6.98871	2.77425e-12	1.39829e-10
EMILIN2	245.579	1.15881	0.191489	6.05156	1.43446e-09	4.50165e-08
OSR2	69.9373	1.15838	0.248353	4.66427	3.09719e-06	4.28789e-05
PNRC1	1392.04	1.15789	0.124521	9.29872	1.4215e-20	1.87159e-18
EGR1	32.0531	1.15573	0.289747	3.98876	6.6421e-05	0.000633898
GATA2	269.37	1.15546	0.2202	5.24733	1.54316e-07	3.08704e-06
YPEL5	590.157	1.15538	0.147914	7.81116	5.66623e-15	4.06174e-13
AQP3	103.372	1.1551	0.233364	4.94978	7.4299e-07	1.22281e-05
ADSSL1	78.2604	1.15172	0.245276	4.6956	2.65823e-06	3.73629e-05
SPATA20	449.708	1.15091	0.155718	7.39101	1.4572e-13	8.74523e-12
PLCD1	158.621	1.15023	0.199315	5.77091	7.8846e-09	2.04698e-07
LINC00087	39.0909	1.14997	0.286657	4.01164	6.02978e-05	0.000587187
ADCY5	55.2936	1.14976	0.278061	4.13492	3.55085e-05	0.000372032
DSE	1224.97	1.14797	0.146729	7.82372	5.12862e-15	3.71767e-13
GPR155	242.673	1.14772	0.186342	6.15922	7.3105e-10	2.41246e-08
LOC100131564	427.598	1.14766	0.15762	7.28121	3.30846e-13	1.8889e-11
ENO2	274.228	1.14551	0.173623	6.59768	4.17636e-11	1.76103e-09
TBC1D2	71.644	1.14308	0.250499	4.56322	5.03745e-06	6.59211e-05
ITGA6	591.514	1.14152	0.154716	7.37818	1.6047e-13	9.54165e-12
CCDC24	80.0336	1.13659	0.249972	4.54688	5.4446e-06	7.08897e-05
GRB14	52.0652	1.13447	0.2781	4.07936	4.51604e-05	0.000455594
RPS27L	2192.27	1.13382	0.117348	9.66206	4.37004e-22	6.79357e-20
CDS1	78.0317	1.13259	0.25043	4.52259	6.10889e-06	7.85089e-05
KAT2B	311.394	1.13229	0.177132	6.39236	1.63346e-10	6.27278e-09
ZNF467	55.6103	1.13204	0.269308	4.20351	2.62809e-05	0.000285439
KIAA0226L	36.712	1.13196	0.287782	3.9334	8.37517e-05	0.00077213
PER3	198.441	1.13117	0.195868	5.77516	7.6882e-09	2.01219e-07
RIMBP2	244.337	1.13112	0.183854	6.15226	7.63878e-10	2.51437e-08
SLC27A3	70.8833	1.13055	0.25521	4.42988	9.42835e-06	0.000115203
IFI30	127.521	1.12895	0.232899	4.84737	1.25108e-06	1.96622e-05
PTCHD4	128.76	1.12675	0.210307	5.35763	8.4322e-08	1.80732e-06
ANK1	67.918	1.12642	0.258571	4.35632	1.32268e-05	0.00015417
MIR100HG	42.6957	1.1258	0.290636	3.87358	0.000107246	0.000953031
DNAH6	110.487	1.12386	0.226625	4.95911	7.08159e-07	1.1775e-05
PBXIP1	2335.45	1.12283	0.137063	8.19206	2.56798e-16	2.17991e-14
GPR83	51.5604	1.12039	0.272565	4.11056	3.94693e-05	0.000406442
ARHGAP24	86.8493	1.12013	0.238907	4.68856	2.75135e-06	3.85039e-05
IGSF8	338.145	1.11976	0.175405	6.38386	1.72678e-10	6.61146e-09
LOC282997	76.6489	1.11729	0.246324	4.53584	5.7375e-06	7.41793e-05
SNCG	41.2269	1.11518	0.285401	3.90741	9.32901e-05	0.000845905
ANKRD6	124.22	1.11303	0.214886	5.17966	2.22289e-07	4.2618e-06
ZNF814	84.2179	1.11087	0.234426	4.73866	2.15137e-06	3.14017e-05
VGLL3	207.755	1.10808	0.215746	5.13602	2.80617e-07	5.27813e-06
TMEM101	209.674	1.10668	0.192503	5.74892	8.98176e-09	2.30401e-07
SCARNA9	122.855	1.10342	0.221802	4.97478	6.53218e-07	1.09746e-05
EXTL1	62.6752	1.10144	0.25629	4.2976	1.72654e-05	0.000195588
C9orf95	47.1343	1.10129	0.270511	4.07116	4.67798e-05	0.000469437
CRTAC1	119.478	1.10126	0.22026	4.99985	5.7376e-07	9.9239e-06
ERN1	178.943	1.09877	0.193305	5.68414	1.31474e-08	3.28762e-07
MIR22HG	133.38	1.09855	0.214022	5.13287	2.85363e-07	5.3518e-06
GPRASP1	237.196	1.09816	0.186826	5.87795	4.15384e-09	1.16011e-07
TSHR	48.0107	1.09806	0.270608	4.05777	4.95446e-05	0.000494985
CKM	303.559	1.09785	0.171588	6.39818	1.57237e-10	6.07433e-09
LGALS3	93.8957	1.09545	0.236706	4.62788	3.6943e-06	4.9966e-05
LOC729177	126.61	1.0945	0.219095	4.99556	5.86645e-07	1.01196e-05
MICAL1	748.056	1.09363	0.161261	6.78172	1.18749e-11	5.47223e-10
HTR7	91.3586	1.09345	0.235398	4.6451	3.39911e-06	4.65098e-05
EDA2R	131.619	1.09169	0.20659	5.28431	1.26178e-07	2.55184e-06
PPL	36.5697	1.09129	0.290377	3.75819	0.00017115	0.0014138
ZBTB38	162.942	1.09111	0.218031	5.00437	5.6044e-07	9.71956e-06
RASSF4	137.995	1.08922	0.208645	5.22045	1.78488e-07	3.50538e-06
ERBB4	37.3299	1.08654	0.295216	3.68048	0.000232798	0.0018383
MAPK4	301.378	1.08617	0.16342	6.64648	3.00177e-11	1.29973e-09
PFKFB2	141.232	1.08508	0.212132	5.1151	3.1357e-07	5.80487e-06
DNAH7	54.9688	1.08419	0.263271	4.11814	3.81951e-05	0.00039553
TUBA1C	346.942	1.0839	0.171519	6.31946	2.62478e-10	9.51335e-09
ARHGAP26	183.116	1.0837	0.197247	5.49411	3.92694e-08	9.06428e-07
PRICKLE1	475.289	1.0836	0.172602	6.27803	3.42887e-10	1.20225e-08
CELF6	56.5983	1.08288	0.262288	4.12859	3.64988e-05	0.000380714
HIC1	36.1497	1.08194	0.293069	3.69176	0.00022271	0.00176838
LLGL2	157.241	1.08181	0.204395	5.29272	1.2051e-07	2.47208e-06
POU3F1	87.3701	1.08155	0.253379	4.26852	1.96777e-05	0.00022021
CNTN3	64.9127	1.08054	0.262133	4.1221	3.75429e-05	0.000389715
STAG3	58.1129	1.07944	0.264284	4.08439	4.41919e-05	0.000447573
NPY1R	103.428	1.07857	0.234085	4.60761	4.07333e-06	5.4408e-05
PGAM2	115.251	1.07509	0.216904	4.95653	7.1764e-07	1.19173e-05
RBFOX1	54.6538	1.07496	0.26918	3.99346	6.51165e-05	0.000624219
NRCAM	411.331	1.07488	0.16414	6.54859	5.80832e-11	2.38678e-09
SLC6A17	283.121	1.07381	0.172614	6.22086	4.94427e-10	1.70122e-08
LEPREL1	86.1551	1.07248	0.241436	4.44207	8.90973e-06	0.000109592
CNTN1	881.757	1.07231	0.160497	6.68122	2.36968e-11	1.04355e-09
SLC22A17	87.0717	1.07188	0.242963	4.4117	1.02563e-05	0.000123911
SEMA4F	528.064	1.06607	0.14197	7.50912	5.95274e-14	3.80239e-12
ITGB5	148.185	1.06562	0.203245	5.24304	1.57948e-07	3.15481e-06
PDCD4	950.999	1.0634	0.147748	7.19741	6.13668e-13	3.36943e-11
KCNK6	45.8693	1.06338	0.278403	3.81959	0.000133676	0.00115296
SCN2A	27.2733	1.05851	0.298691	3.54384	0.000394337	0.00286333
PTGER1	37.1747	1.05793	0.296297	3.57049	0.000356316	0.00263018
B4GALNT3	116.711	1.05766	0.225108	4.69847	2.62112e-06	3.69622e-05
GDNF	36.869	1.05755	0.284237	3.72066	0.000198701	0.0015984
F3	232.975	1.05701	0.183092	5.77313	7.78122e-09	2.0296e-07
CCDC80	33.5669	1.05586	0.29348	3.59774	0.000321	0.00239969
CASP8	37.6177	1.05582	0.296943	3.55562	0.000377089	0.00275514
FRAS1	503.666	1.05136	0.170189	6.17757	6.50963e-10	2.18166e-08
NELL1	610.415	1.05133	0.142623	7.3714	1.68841e-13	9.94772e-12
KIAA1456	188.323	1.051	0.206921	5.07925	3.78937e-07	6.88652e-06
PPM1H	379.475	1.04989	0.174804	6.00612	1.90015e-09	5.83754e-08
LRP1	394.212	1.04975	0.17226	6.09401	1.10118e-09	3.56104e-08
SOCS2	329.51	1.04867	0.164823	6.36238	1.9865e-10	7.49467e-09
RHBDL3	125.268	1.04864	0.220153	4.76323	1.90518e-06	2.82557e-05
USP53	175.435	1.04842	0.196534	5.33455	9.57815e-08	2.00954e-06
DACT1	359.143	1.04798	0.159276	6.57964	4.71586e-11	1.95655e-09
LRRTM1	73.5502	1.04779	0.251398	4.16787	3.07461e-05	0.000326247
ALCAM	2488.85	1.04654	0.140418	7.45306	9.11985e-14	5.6035e-12
LONRF3	50.4455	1.04574	0.273074	3.82951	0.000128398	0.00111264
TNC	460.26	1.04528	0.151547	6.8974	5.29642e-12	2.55954e-10
IFI27L2	107.749	1.04507	0.23675	4.41424	1.01364e-05	0.000122807
CROCC	466.673	1.04472	0.164279	6.35942	2.02512e-10	7.61811e-09
PINK1	441.901	1.04255	0.154034	6.76832	1.30289e-11	5.89868e-10
ELOVL7	120.453	1.04213	0.224756	4.63671	3.54004e-06	4.81827e-05
NGFR	132.966	1.04206	0.306882	3.39563	0.000684714	0.00453535
MMP2	559.818	1.0419	0.173101	6.01904	1.75452e-09	5.42893e-08
CCDC85A	103.1	1.0407	0.223531	4.65571	3.22866e-06	4.44603e-05
RIMS1	101.975	1.0378	0.235915	4.39903	1.08737e-05	0.000130273
DUSP5	151.123	1.03779	0.203593	5.09735	3.44434e-07	6.30387e-06
OLFML3	243.633	1.03667	0.176198	5.88354	4.01576e-09	1.12642e-07
PDZRN3	1279.14	1.03605	0.13832	7.49025	6.87433e-14	4.3268e-12
HIST1H2AJ	249.463	1.03577	0.189384	5.46918	4.52129e-08	1.03071e-06
ABCD1	88.4245	1.03564	0.230722	4.48867	7.16702e-06	9.04854e-05
ID3	1950.23	1.03537	0.151189	6.84818	7.47974e-12	3.5482e-10
D4S234E	483.821	1.03519	0.153048	6.76378	1.34436e-11	6.04401e-10
TPBG	173.091	1.03456	0.196133	5.2748	1.329e-07	2.67939e-06
KCNMB4	166.426	1.03392	0.197688	5.23006	1.69455e-07	3.34835e-06
NEAT1	959.606	1.03246	0.162416	6.3569	2.05861e-10	7.69919e-09
CREG1	1067.21	1.03168	0.127667	8.08106	6.42066e-16	5.21042e-14
RIN1	40.5052	1.02831	0.283061	3.63281	0.000280349	0.00214934
TSHZ2	145.428	1.02192	0.227563	4.49073	7.09807e-06	8.98787e-05
NTRK3	53.4418	1.02132	0.268526	3.80344	0.000142701	0.00121938
LRIG1	230.894	1.02097	0.182207	5.60336	2.10235e-08	5.13762e-07
C7orf41	1164.49	1.02085	0.136536	7.47676	7.61747e-14	4.72539e-12
RIBC1	27.6512	1.0205	0.299442	3.408	0.000654398	0.00438178
AIM1	59.0936	1.01847	0.258555	3.9391	8.17891e-05	0.000756745
ASL	475.473	1.01821	0.174459	5.83638	5.33487e-09	1.44008e-07
CASZ1	227.639	1.01685	0.212843	4.77745	1.77535e-06	2.65746e-05
IL12RB2	34.4316	1.01323	0.290921	3.48283	0.000496153	0.00350019
CD9	470.765	1.01293	0.159083	6.36732	1.92353e-10	7.27841e-09
CSAD	141.138	1.01286	0.213855	4.73618	2.17782e-06	3.16803e-05
MAST4	101.48	1.01247	0.23128	4.37769	1.19945e-05	0.000141467
ODZ1	54.7702	1.01181	0.268146	3.77337	0.000161054	0.00134439
COL11A2	45.1238	1.00932	0.281309	3.58795	0.000333286	0.00247861
PTGFR	958.571	1.00769	0.158632	6.35237	2.12024e-10	7.90678e-09
HBEGF	48.3219	1.00749	0.268178	3.75679	0.000172107	0.00141898
RTN4RL1	34.8494	1.00743	0.296547	3.39719	0.000680811	0.00451878
KLF9	342.189	1.00671	0.161648	6.22777	4.73127e-10	1.63229e-08
SPRY2	116.725	1.00638	0.218268	4.61073	4.01253e-06	5.37072e-05
ALS2CL	51.96	1.00632	0.274419	3.66709	0.00024533	0.00192431
ANK3	195.548	1.00603	0.187697	5.35987	8.32801e-08	1.78796e-06
LOC100499489	57.6645	1.00545	0.270939	3.71099	0.000206447	0.00165247
LRRN2	193.989	1.00504	0.189992	5.2899	1.22381e-07	2.49459e-06
ELL3	48.3125	1.00478	0.269206	3.73237	0.000189685	0.00154125
ABCC8	296.579	1.00422	0.167389	5.99933	1.9813e-09	6.04368e-08
PIK3IP1	167.482	1.00321	0.201261	4.98463	6.20792e-07	1.05396e-05
ZNF268	733.893	1.00304	0.153797	6.52186	6.94404e-11	2.82646e-09
PGR	201.259	1.00144	0.199676	5.01533	5.29421e-07	9.25626e-06
ROM1	42.903	1.00124	0.275358	3.63614	0.000276751	0.00213062
DNALI1	39.1564	1.00092	0.281496	3.55573	0.00037693	0.00275514
ITGA7	36.9556	1.00061	0.288777	3.46499	0.000530245	0.00370626
ARHGAP29	287.663	1.00056	0.187165	5.34585	8.99916e-08	1.90405e-06
PCDH17	131.256	0.998062	0.21485	4.64539	3.39437e-06	4.64943e-05
ATP8A2	66.6016	0.997561	0.253662	3.93264	8.40183e-05	0.000773796
APLP2	4915.19	0.997355	0.110276	9.04416	1.50825e-19	1.81878e-17
BACH2	37.9722	0.996362	0.292694	3.4041	0.000663814	0.00443793
HOMEZ	89.4815	0.996263	0.23961	4.15786	3.21248e-05	0.000340037
DNM3	101.301	0.995255	0.226307	4.39781	1.0935e-05	0.000130885
TENC1	42.4464	0.99492	0.283518	3.5092	0.000449459	0.00320584
LOC388849	78.4788	0.994855	0.246109	4.04234	5.29207e-05	0.000524451
FAM174B	169.218	0.993379	0.192189	5.16875	2.35665e-07	4.50486e-06
SLC12A4	164.533	0.99265	0.203695	4.87321	1.09799e-06	1.7469e-05
FAM196A	44.9178	0.9922	0.278289	3.56536	0.000363361	0.00267606
RGS5	430.813	0.991597	0.16954	5.84874	4.95313e-09	1.34265e-07
KLF4	65.6928	0.991451	0.24992	3.96707	7.27601e-05	0.000686777
PCDH8	140.02	0.991415	0.220663	4.49289	7.02617e-06	8.91432e-05
CORIN	37.3106	0.988807	0.286856	3.44706	0.000566731	0.00390836
LRRC16B	102.771	0.988742	0.238715	4.14194	3.44378e-05	0.000361869
EPS8	499.689	0.987669	0.150046	6.58246	4.62726e-11	1.93222e-09
MDM2	4617.26	0.987413	0.15445	6.39308	1.62576e-10	6.26183e-09
PRKG1	51.726	0.986518	0.268795	3.67014	0.000242413	0.00190839
PLEKHG5	72.5456	0.986465	0.249516	3.95351	7.70141e-05	0.000719005
SERPINB8	47.9787	0.984728	0.271376	3.62864	0.000284916	0.00218177
GPR37	74.2078	0.984209	0.249099	3.95107	7.78029e-05	0.000724831
KCNK3	68.4965	0.982718	0.261183	3.76256	0.000168181	0.00139194
LGALS8	134.316	0.982583	0.224779	4.37133	1.2349e-05	0.000145383
KCNH8	219.871	0.980781	0.183901	5.3332	9.64949e-08	2.02122e-06
GRIA3	63.5171	0.980429	0.253692	3.86465	0.000111249	0.000983856
INSM1	529.917	0.97958	0.207376	4.72368	2.31613e-06	3.35689e-05
OSTF1	122.766	0.979416	0.211466	4.63156	3.62929e-06	4.91899e-05
GCC2	1839.58	0.979374	0.137345	7.13075	9.98223e-13	5.25717e-11
C1orf95	122.509	0.978444	0.219221	4.46329	8.07124e-06	0.000100621
EID3	29.5569	0.978317	0.293449	3.33386	0.000856509	0.00546295
SCG3	321.333	0.975959	0.174811	5.58293	2.36496e-08	5.68562e-07
CELF3	345.623	0.9755	0.166599	5.85538	4.75909e-09	1.30099e-07
B3GNT9	80.5078	0.974209	0.238627	4.08256	4.45423e-05	0.000450415
SSTR5	88.6785	0.973956	0.24317	4.00524	6.19547e-05	0.000598354
C5orf41	151.319	0.96973	0.222658	4.35524	1.3292e-05	0.00015465
IL13RA1	346.994	0.969432	0.176195	5.50203	3.75438e-08	8.68151e-07
DTX3L	94.1515	0.969326	0.239297	4.05072	5.10595e-05	0.000507958
TMEM200A	99.546	0.968598	0.234254	4.13483	3.55223e-05	0.000372032
COMTD1	134.353	0.968489	0.239465	4.04438	5.24621e-05	0.000520707
ARSJ	98.5279	0.968123	0.22901	4.22743	2.36373e-05	0.000259672
LOC100506190	147.034	0.968041	0.211012	4.5876	4.48365e-06	5.93359e-05
ABTB1	29.0702	0.967898	0.298763	3.23968	0.00119663	0.00725159
DNAJB5	257.205	0.967373	0.167368	5.77991	7.47384e-09	1.96006e-07
C17orf82	54.1816	0.967161	0.263484	3.67066	0.000241921	0.00190568
RAPGEF4	91.7506	0.966485	0.241972	3.9942	6.49122e-05	0.000622723
AGRN	356.224	0.966467	0.179923	5.37156	7.80574e-08	1.68989e-06
ST8SIA4	178.597	0.965241	0.196383	4.91509	8.87421e-07	1.4403e-05
RNF182	203.993	0.962867	0.199588	4.82428	1.40508e-06	2.15317e-05
IFITM2	31.0197	0.961486	0.292607	3.28592	0.00101648	0.00630866
C15orf59	73.6239	0.961472	0.246365	3.90264	9.51507e-05	0.000860357
FERMT3	25.0613	0.960446	0.299201	3.21004	0.00132716	0.00792797
DFNB31	56.331	0.960061	0.266183	3.60677	0.000310037	0.00233746
PARP8	241.911	0.95908	0.18489	5.1873	2.13361e-07	4.10895e-06
RHOC	1163.64	0.959067	0.160063	5.9918	2.07537e-09	6.27131e-08
BAALC	112.505	0.958438	0.222644	4.3048	1.67137e-05	0.000189839
SEMA6C	267.898	0.957998	0.192109	4.98675	6.14039e-07	1.04761e-05
C17orf104	108.002	0.957824	0.24058	3.98132	6.85331e-05	0.000651165
SYNPO	42.442	0.957671	0.282287	3.39255	0.000692458	0.00457183
PTRH1	123.66	0.95637	0.226047	4.23085	2.32805e-05	0.000256086
PAIP2B	191.718	0.956175	0.189832	5.03694	4.73033e-07	8.41391e-06
SHROOM3	808.167	0.955962	0.140064	6.82519	8.78061e-12	4.1349e-10
TTC39B	86.9933	0.955732	0.235473	4.05878	4.93299e-05	0.000493414
NHS	56.2418	0.955362	0.278024	3.43626	0.000589813	0.00404161
WBP1	57.1038	0.954028	0.263397	3.62201	0.00029232	0.00222657
RTN1	1008.3	0.9536	0.133356	7.15079	8.6282e-13	4.58147e-11
PCOLCE	208.843	0.952703	0.202581	4.70282	2.5659e-06	3.6223e-05
AGAP2	43.2816	0.952549	0.287648	3.31151	0.000927925	0.00583765
C5orf4	72.1551	0.950587	0.255261	3.72398	0.000196104	0.00158343
BMP8A	30.752	0.950292	0.296552	3.20447	0.0013531	0.00805107
TRIM62	92.837	0.94985	0.237495	3.99945	6.34902e-05	0.000610443
TMEM53	41.8842	0.949774	0.285516	3.32652	0.000879367	0.00558115
CD82	52.494	0.949233	0.266614	3.56033	0.000370396	0.00271392
MAFB	196.54	0.948731	0.199086	4.76543	1.88455e-06	2.79819e-05
ADAMTSL3	35.0335	0.948256	0.288972	3.28148	0.00103265	0.00640593
NQO1	1642.6	0.948222	0.149621	6.33749	2.33537e-10	8.58497e-09
PIDD	293.878	0.947119	0.173993	5.44342	5.22678e-08	1.17904e-06
PDE3A	649.435	0.94685	0.185642	5.10042	3.38898e-07	6.2316e-06
CERCAM	188.039	0.945801	0.196371	4.8164	1.46173e-06	2.23003e-05
SPTBN4	111.793	0.945322	0.22028	4.29145	1.77506e-05	0.000200382
COL27A1	228.998	0.941414	0.184588	5.10008	3.39519e-07	6.2316e-06
SERTAD1	152.21	0.941232	0.207971	4.52578	6.01733e-06	7.74147e-05
DST	3188.77	0.939929	0.143888	6.53236	6.47427e-11	2.64359e-09
PREX1	874.487	0.939927	0.134265	7.00052	2.55008e-12	1.29542e-10
GPNMB	59.551	0.937644	0.256299	3.65839	0.000253802	0.00197874
LAMB2	237.089	0.936089	0.178634	5.24027	1.60341e-07	3.18639e-06
SSH2	417.689	0.935039	0.167027	5.59814	2.16664e-08	5.27474e-07
REC8	1224.5	0.934706	0.153827	6.07633	1.22966e-09	3.88879e-08
FBXO4	106.286	0.934425	0.236113	3.95753	7.57288e-05	0.000711156
TRNP1	172.539	0.934246	0.200355	4.66295	3.11707e-06	4.30617e-05
GAB2	399.017	0.933966	0.154415	6.04841	1.46282e-09	4.57016e-08
MRC2	586.369	0.933962	0.158198	5.90376	3.55307e-09	1.01204e-07
NUDT8	39.1264	0.932287	0.287915	3.23807	0.00120342	0.00727634
SERPINF1	605.375	0.931007	0.170638	5.45603	4.86898e-08	1.10606e-06
PFN4	40.2557	0.926669	0.28194	3.28676	0.00101349	0.00629307
CHPF	356.501	0.9263	0.189556	4.88668	1.0255e-06	1.63966e-05
ABCA10	241.414	0.926131	0.196829	4.70526	2.53546e-06	3.59188e-05
BMP4	49.173	0.92547	0.276129	3.35159	0.000803483	0.00516559
LOC730091	31.0555	0.925227	0.297276	3.11235	0.00185601	0.0104363
NEFL	2014.75	0.92505	0.11597	7.97662	1.50396e-15	1.1415e-13
FAM201A	50.9422	0.9236	0.266933	3.46005	0.000540073	0.00375259
HOXD11	121.166	0.922927	0.224106	4.11825	3.81755e-05	0.00039553
CYFIP2	1045.31	0.920972	0.133743	6.88611	5.73379e-12	2.76056e-10
ZNF524	60.2018	0.920591	0.261884	3.51526	0.000439322	0.00313868
ACE	62.4162	0.919347	0.277705	3.31052	0.000931225	0.00584985
CCDC64	113.498	0.919214	0.220837	4.16241	3.149e-05	0.000333592
MBNL2	206.865	0.918738	0.196513	4.67521	2.93649e-06	4.08732e-05
STON2	1169.73	0.918589	0.156293	5.87737	4.16843e-09	1.16167e-07
NTRK1	489.224	0.918301	0.176094	5.21482	1.83992e-07	3.60249e-06
FKBP1B	76.1742	0.917943	0.244896	3.74829	0.000178043	0.00146231
BCAR3	130.936	0.917146	0.206728	4.43649	9.14385e-06	0.000111832
ZNF75A	140.619	0.916265	0.199512	4.59252	4.37927e-06	5.80738e-05
LOC100506990	32.2291	0.91626	0.289094	3.16942	0.00152742	0.00886961
CCDC74B	68.8582	0.916051	0.259693	3.52744	0.000419601	0.00301959
ADAM15	1202.74	0.915797	0.145952	6.27466	3.50389e-10	1.22522e-08
OLFML2B	31.3018	0.915488	0.296556	3.08706	0.00202146	0.0111275
LINC00472	67.313	0.914571	0.245185	3.73012	0.000191386	0.00155116
RAB3B	612.13	0.914485	0.165876	5.51306	3.52647e-08	8.19857e-07
KIAA1199	62.688	0.912366	0.256183	3.56138	0.000368915	0.00270769
FRAT1	74.8568	0.911976	0.253624	3.59578	0.00032342	0.00241358
SYTL3	325.322	0.911845	0.160434	5.68363	1.31869e-08	3.29111e-07
RGS3	251.413	0.91171	0.179406	5.08183	3.73823e-07	6.81276e-06
NEK10	56.7631	0.911162	0.261528	3.48399	0.000493989	0.00348875
TOX	58.4023	0.910938	0.25785	3.53282	0.000411156	0.00297041
NOS1AP	40.3124	0.910922	0.289146	3.15039	0.00163052	0.00935883
ARHGEF3	182.564	0.910676	0.188611	4.82834	1.37675e-06	2.11728e-05
NRG1	112.303	0.910289	0.227379	4.0034	6.24392e-05	0.000601682
LYST	173.907	0.909975	0.207839	4.37828	1.1962e-05	0.000141212
GADD45A	1046.08	0.906803	0.133775	6.77858	1.21362e-11	5.57273e-10
TNNT1	63.1628	0.906611	0.273367	3.31646	0.000911664	0.00574936
CAMK2B	60.4742	0.905394	0.254898	3.55198	0.000382339	0.00278876
LOC100506343	168.305	0.905024	0.190522	4.75024	2.03176e-06	2.9961e-05
ABHD4	59.0949	0.904777	0.262339	3.44888	0.000562908	0.00388407
MSC	56.6092	0.903811	0.265573	3.40325	0.000665889	0.00444949
HDAC11	156.099	0.903794	0.201624	4.48256	7.37513e-06	9.24794e-05
NDST3	27.1349	0.903091	0.300917	3.00113	0.00268979	0.0139607
LOC155060	155.876	0.902407	0.205	4.40198	1.07267e-05	0.000128871
LOC100131434	54.4417	0.900768	0.267977	3.36136	0.000775585	0.00501623
RASEF	54.0774	0.899502	0.261225	3.4434	0.000574441	0.0039586
NEK11	40.1537	0.898087	0.275285	3.26239	0.00110478	0.0067752
LOC157627	100.046	0.897995	0.237897	3.77472	0.000160184	0.00133951
GNG2	579.929	0.897023	0.178463	5.02638	4.99833e-07	8.78657e-06
ADAMTSL1	173.463	0.897014	0.199917	4.48693	7.22555e-06	9.10462e-05
TFAP2E	29.2535	0.896726	0.294515	3.04476	0.00232868	0.0125196
ARHGAP6	182.983	0.895166	0.190892	4.68938	2.74028e-06	3.83907e-05
TEX14	45.5925	0.89507	0.2753	3.25125	0.00114897	0.00699961
FAM8A1	470.642	0.895009	0.159178	5.6227	1.87996e-08	4.63807e-07
SYBU	524.074	0.894986	0.148385	6.03152	1.62426e-09	5.03793e-08
PTER	93.8997	0.894974	0.232358	3.8517	0.000117302	0.00103314
SULT1C4	308.373	0.894719	0.161728	5.53224	3.16165e-08	7.40524e-07
AMIGO2	151.069	0.893497	0.196919	4.53739	5.69535e-06	7.37082e-05
RAB40B	477.649	0.891067	0.155348	5.73593	9.6981e-09	2.47791e-07
CYP27B1	35.4064	0.891035	0.287402	3.1003	0.00193322	0.0107557
TESK1	125.489	0.890979	0.222315	4.00773	6.13041e-05	0.000593849
C1orf63	843.397	0.890895	0.12869	6.92281	4.4276e-12	2.17222e-10
HS3ST3B1	100.908	0.889772	0.232905	3.82032	0.000133277	0.00115105
RUNDC3B	79.1333	0.889644	0.248155	3.58504	0.000337024	0.00250151
KIAA0284	340.097	0.889134	0.183655	4.84134	1.28967e-06	2.01461e-05
CMPK2	53.3741	0.888249	0.271301	3.27404	0.00106021	0.00652978
LOC100505806	44.6111	0.887885	0.275728	3.22014	0.00128127	0.00768687
RHBDF2	95.1215	0.88635	0.230234	3.84978	0.000118222	0.00104053
CADM1	1083.12	0.885711	0.130749	6.77411	1.2517e-11	5.70696e-10
RENBP	57.4193	0.88565	0.273605	3.23697	0.00120808	0.00729956
PTGR1	32.0897	0.884992	0.29264	3.02417	0.00249317	0.0131914
VSIG10L	50.1079	0.884526	0.268271	3.29714	0.000976741	0.00610901
LOC100130705	38.9711	0.884288	0.28347	3.11951	0.00181154	0.0102474
LMX1B	41.948	0.883272	0.282245	3.12945	0.00175132	0.0099635
CAPN5	62.3973	0.882531	0.257796	3.42338	0.000618483	0.00419794
STAT2	1011.73	0.881864	0.124795	7.06648	1.58911e-12	8.26787e-11
SYT17	96.3957	0.881533	0.233347	3.77777	0.000158239	0.00133013
RND2	231.674	0.88123	0.176456	4.99405	5.91269e-07	1.01858e-05
DDC	74.6208	0.879858	0.254974	3.45078	0.000558969	0.00385895
KCNH3	241.498	0.878653	0.200298	4.38672	1.15071e-05	0.000136592
PDZD2	75.3501	0.877966	0.246228	3.56566	0.000362948	0.00267454
NAP1L5	268.903	0.877349	0.174198	5.03652	4.74069e-07	8.41391e-06
AKNAD1	665.267	0.876719	0.147567	5.94117	2.82999e-09	8.22417e-08
TLE6	73.5387	0.876487	0.255494	3.43055	0.00060235	0.00410789
P4HTM	94.5232	0.874383	0.230487	3.79364	0.000148456	0.00126146
OPRK1	38.1116	0.872605	0.280372	3.11231	0.00185627	0.0104363
GAP43	39.2695	0.872376	0.287212	3.03739	0.00238636	0.0127447
XKR9	44.3549	0.871782	0.281202	3.1002	0.0019339	0.0107557
PCDH9	224.549	0.871731	0.181339	4.8072	1.53062e-06	2.32621e-05
TERF2IP	883.987	0.870708	0.128929	6.75341	1.44408e-11	6.44739e-10
QSOX1	1206.43	0.869023	0.142968	6.07844	1.21357e-09	3.86445e-08
ZNF396	41.8996	0.867819	0.280762	3.09094	0.00199526	0.011005
C15orf27	47.3447	0.867383	0.280759	3.08942	0.0020055	0.0110491
GLCCI1	604.355	0.866608	0.155961	5.55657	2.7513e-08	6.56192e-07
SLC22A5	117.442	0.86642	0.222492	3.89417	9.85358e-05	0.000885381
OPRD1	147.749	0.865819	0.212499	4.07447	4.61201e-05	0.000464549
MXD1	184.246	0.865508	0.199069	4.34777	1.3753e-05	0.000159439
ZNF471	39.1814	0.865391	0.290093	2.98315	0.00285301	0.0146197
ARHGAP44	125.65	0.865095	0.207027	4.17866	2.9323e-05	0.000314248
JUN	1263.03	0.863925	0.166243	5.19677	2.02784e-07	3.92151e-06
TMEM63B	362.484	0.862113	0.162933	5.29122	1.21503e-07	2.48279e-06
PPM1D	2123.63	0.862021	0.120093	7.17793	7.07737e-13	3.85313e-11
GATM	657.743	0.860097	0.138525	6.20896	5.33371e-10	1.83034e-08
FZD5	93.6443	0.85815	0.227238	3.77644	0.000159084	0.00133463
B4GALT6	122.623	0.858009	0.235867	3.63768	0.000275105	0.00212362
CUL7	569.169	0.857138	0.145528	5.88987	3.86506e-09	1.08888e-07
ATP8B1	51.2393	0.857065	0.267276	3.20667	0.00134283	0.00799931
SNPH	51.5187	0.856487	0.274854	3.11616	0.00183224	0.0103328
PCDHB14	95.0734	0.854834	0.229837	3.7193	0.000199773	0.00160603
MYLK	442.595	0.854467	0.147262	5.80235	6.5392e-09	1.73612e-07
ATP10D	610.235	0.852211	0.164153	5.19157	2.08524e-07	4.02181e-06
CDC42EP3	994.983	0.852115	0.136536	6.24096	4.34903e-10	1.50848e-08
ST6GALNAC4	169.937	0.85124	0.212206	4.01138	6.03645e-05	0.000587393
SCRN2	843.042	0.849043	0.163711	5.18623	2.14596e-07	4.12657e-06
SHC1	7004.24	0.848703	0.109788	7.73036	1.07244e-14	7.32154e-13
PCSK2	43.5176	0.848206	0.277887	3.05234	0.00227062	0.0122636
MARCH9	100.605	0.847779	0.227311	3.72961	0.00019178	0.00155338
PLEKHG4	1435.59	0.847282	0.144441	5.86595	4.46563e-09	1.23383e-07
HMX3	67.2197	0.846552	0.25377	3.33591	0.000850217	0.00542549
CCDC73	66.4982	0.846508	0.254569	3.32526	0.000883352	0.00559818
APOBEC2	27.3146	0.846238	0.295566	2.86311	0.00419508	0.0201298
FAM214B	198.228	0.845871	0.188146	4.49582	6.9301e-06	8.80109e-05
MCF2L2	33.0231	0.844763	0.293524	2.878	0.004002	0.0193836
GNS	2814.4	0.843741	0.11429	7.38245	1.55398e-13	9.28289e-12
SDC1	523.693	0.840767	0.162127	5.18587	2.15012e-07	4.12843e-06
KAL1	269.144	0.839621	0.19252	4.36121	1.29346e-05	0.000151311
SYT13	72.5655	0.838858	0.246097	3.40865	0.000652858	0.00437601
DOCK5	442.033	0.83862	0.152158	5.51149	3.55808e-08	8.25718e-07
DISP2	52.0116	0.837193	0.269122	3.11083	0.00186562	0.0104661
FRY	188.547	0.83703	0.190931	4.38393	1.16556e-05	0.000137974
ERO1LB	94.9831	0.836635	0.240056	3.48516	0.000491843	0.00347549
MAOA	610.637	0.836634	0.157547	5.31038	1.094e-07	2.26578e-06
MOB3C	114.013	0.836468	0.218499	3.82825	0.000129058	0.00111686
EGFLAM	482.833	0.835819	0.145831	5.73143	9.95892e-09	2.53452e-07
UBTD1	123.184	0.835716	0.221726	3.76915	0.000163806	0.00136185
GAB3	51.4203	0.834918	0.266017	3.13859	0.00169763	0.00970946
SOX9	86.2734	0.834848	0.238922	3.49422	0.000475445	0.0033707
ALPK2	53.9402	0.834407	0.261894	3.18605	0.00144232	0.00848231
EEF1A2	3980.11	0.834242	0.157631	5.29238	1.20737e-07	2.47281e-06
ZNF792	129.953	0.833854	0.20372	4.09314	4.25576e-05	0.000432795
ERVK13-1	437.999	0.831994	0.152646	5.45047	5.02359e-08	1.13918e-06
SLC6A2	629.613	0.831679	0.151901	5.47514	4.3716e-08	1.00012e-06
B3GAT2	90.9269	0.83157	0.230904	3.60136	0.000316553	0.00237332
MSX2	264.809	0.830557	0.190116	4.36869	1.24994e-05	0.000146885
ARAP2	44.1865	0.830235	0.273589	3.0346	0.00240852	0.0128259
LOC100505666	35.1678	0.830196	0.283535	2.92802	0.00341125	0.0169768
GPR153	196.384	0.828918	0.20768	3.99132	6.57063e-05	0.000628472
LOC400604	42.8982	0.828249	0.288185	2.87402	0.00405286	0.0195858
PCGF5	244.363	0.828035	0.201718	4.10492	4.04459e-05	0.000414844
ABCA5	3435.3	0.827777	0.166709	4.96539	6.85614e-07	1.14443e-05
MR1	45.3692	0.827243	0.272903	3.03127	0.00243531	0.0129205
SYNPO2	1414.68	0.827008	0.153782	5.37778	7.54083e-08	1.64324e-06
FAM84A	32493.3	0.825976	0.113025	7.30793	2.71283e-13	1.56967e-11
C3orf64	343.409	0.824659	0.186499	4.42178	9.78897e-06	0.00011927
PEX5L	164.058	0.823642	0.199682	4.12476	3.71122e-05	0.000386444
TMEM130	38.143	0.82352	0.303261	2.71555	0.00661653	0.0287936
KLHDC8B	249.602	0.822079	0.186956	4.39718	1.09668e-05	0.000131023
MARCH3	51.9097	0.818992	0.264511	3.09625	0.00195987	0.0108684
ZNF563	49.1146	0.818596	0.263716	3.10408	0.00190873	0.0106478
ITGA9	535.435	0.818514	0.139798	5.85497	4.77082e-09	1.30144e-07
LRRC7	65.9615	0.818473	0.249873	3.27556	0.00105454	0.00650106
NEU1	881.775	0.818461	0.136071	6.01494	1.79956e-09	5.5417e-08
PTPRE	38.7686	0.817661	0.283096	2.88828	0.00387353	0.0188604
LHX8	402.189	0.817435	0.15469	5.28435	1.26155e-07	2.55184e-06
ZDHHC21	539.784	0.816847	0.177612	4.59905	4.24419e-06	5.64565e-05
FOSL2	248.028	0.816446	0.181255	4.5044	6.65619e-06	8.46156e-05
LOC100130417	99.1751	0.816285	0.22449	3.63618	0.000276711	0.00213062
FAM190A	225.252	0.815713	0.183333	4.44935	8.6132e-06	0.00010635
INPP5F	719.98	0.815298	0.140406	5.80673	6.37052e-09	1.70537e-07
NOL4	207.954	0.814837	0.179949	4.52815	5.9503e-06	7.67768e-05
LGALS1	28.5549	0.813809	0.298992	2.72184	0.00649186	0.0283545
STAMBPL1	343.746	0.813438	0.155424	5.23368	1.66166e-07	3.2899e-06
STARD5	32.1515	0.812887	0.288467	2.81796	0.00483305	0.0225292
EFEMP2	51.8998	0.812799	0.270948	2.99983	0.0027013	0.0140092
GPX3	149.045	0.811604	0.204428	3.97013	7.18342e-05	0.00067903
GDE1	1520.15	0.811314	0.119626	6.78208	1.18461e-11	5.47223e-10
ATP2B4	559.286	0.811166	0.152834	5.3075	1.11137e-07	2.29073e-06
TRIM46	139.329	0.809704	0.216914	3.73283	0.000189341	0.00154018
SMOC1	37.9159	0.809251	0.28372	2.85229	0.0043406	0.0207104
CNR1	518.023	0.809027	0.162974	4.96414	6.90062e-07	1.15037e-05
JUNB	837.87	0.80861	0.16998	4.75707	1.96419e-06	2.90975e-05
RHPN1	164.077	0.808411	0.21052	3.84007	0.000123	0.00107307
GRN	2057.23	0.808346	0.161226	5.01374	5.33818e-07	9.30791e-06
EFNB1	282.014	0.80689	0.178832	4.51201	6.42177e-06	8.20397e-05
BTBD18	32.1327	0.806828	0.297484	2.71217	0.00668434	0.0290202
LRRC43	44.388	0.805292	0.274502	2.93365	0.00335006	0.0167153
NR4A3	25.2601	0.804971	0.305348	2.63624	0.00838301	0.0346908
TCTA	132.527	0.804841	0.213215	3.77479	0.000160141	0.00133951
NAT1	49.3269	0.804531	0.268347	2.9981	0.00271666	0.0140666
FMNL1	115.42	0.804518	0.238044	3.3797	0.000725657	0.00473861
TOM1L2	193.482	0.80427	0.182898	4.39737	1.09572e-05	0.000131023
CCDC74A	209.403	0.803897	0.182914	4.39495	1.10799e-05	0.000132129
PLEKHM1P	279.355	0.802632	0.167827	4.78249	1.73136e-06	2.60067e-05
VMAC	52.6564	0.802186	0.270567	2.96484	0.00302842	0.015366
SLC41A2	56.6693	0.80169	0.262625	3.05261	0.00226862	0.012258
TMX4	1124.47	0.801098	0.129651	6.17889	6.45543e-10	2.16912e-08
ACER2	114.043	0.800943	0.212048	3.77718	0.000158616	0.00133222
ELF4	64.3043	0.800721	0.250817	3.19245	0.00141071	0.00832302
CACNA2D2	67.6948	0.799685	0.258644	3.09184	0.00198921	0.0109781
MFI2	245.656	0.799285	0.183423	4.35761	1.31491e-05	0.000153402
AP3B2	309.636	0.79919	0.173149	4.61562	3.9192e-06	5.26765e-05
C2orf55	41.8571	0.798804	0.296815	2.69125	0.0071184	0.0304639
TUBB2B	799.174	0.798059	0.15936	5.00788	5.50323e-07	9.58275e-06
EVI5L	194.828	0.79785	0.196884	4.05238	5.06983e-05	0.000504753
DCX	444.468	0.797355	0.165149	4.82811	1.37837e-06	2.11728e-05
REEP2	240.234	0.797164	0.200371	3.97844	6.93693e-05	0.000658141
NACAD	44.6621	0.796139	0.278987	2.85368	0.00432163	0.0206373
PKD1L1	23.7523	0.795742	0.303493	2.62195	0.00874288	0.0359037
MAPT	153.344	0.795037	0.20915	3.80129	0.000143947	0.0012284
ACVR1	71.8494	0.79378	0.248483	3.1945	0.00140073	0.00826789
PPFIA4	244.523	0.793673	0.188233	4.21645	2.48183e-05	0.000271152
CDO1	279.592	0.793356	0.167355	4.74057	2.13122e-06	3.12135e-05
AGTR1	54.2241	0.79315	0.262841	3.0176	0.00254786	0.013402
CNIH3	315.542	0.792787	0.158979	4.98675	6.14048e-07	1.04761e-05
NRBP2	194.661	0.792657	0.203814	3.88911	0.000100612	0.00090153
UBE2H	1027.64	0.792457	0.138193	5.73441	9.78496e-09	2.49516e-07
FBXL21	160.759	0.791737	0.202425	3.91125	9.18181e-05	0.000833143
DNAJC1	451.143	0.791648	0.151263	5.2336	1.66241e-07	3.2899e-06
EHBP1L1	58.0833	0.79016	0.261735	3.01893	0.00253669	0.0133541
SLC17A5	222.93	0.789742	0.174818	4.5175	6.25736e-06	8.0098e-05
TRIM9	463.442	0.789445	0.150176	5.25679	1.46589e-07	2.94159e-06
IQGAP2	292.801	0.78942	0.171883	4.59278	4.37375e-06	5.80601e-05
SGK1	41.8528	0.788788	0.285302	2.76474	0.00569677	0.0256334
ALDH1A3	152.954	0.788721	0.211125	3.73581	0.000187114	0.0015242
OGDHL	1013.65	0.788231	0.137863	5.71751	1.08099e-08	2.74027e-07
AFF1	345.228	0.788147	0.165101	4.77373	1.80845e-06	2.69484e-05
SYNE1	1150.22	0.788133	0.127002	6.20569	5.4457e-10	1.86382e-08
FER1L4	35.8842	0.788105	0.285468	2.76075	0.00576688	0.025906
PCDH11X	55.4848	0.78775	0.270646	2.91063	0.00360699	0.0177638
AHNAK	7249.49	0.786427	0.149833	5.24871	1.53172e-07	3.06891e-06
JAG2	63.0414	0.786404	0.267057	2.94471	0.00323261	0.0162171
CUX2	244.379	0.786387	0.187354	4.19734	2.70065e-05	0.000292581
ITPR1	1370.95	0.786265	0.136196	5.77302	7.78618e-09	2.0296e-07
DCLK2	113.233	0.786148	0.214768	3.66045	0.000251774	0.00196411
TPPP	116.427	0.785849	0.212865	3.69177	0.000222695	0.00176838
MAPK10	552.144	0.785643	0.15324	5.12687	2.94595e-07	5.48846e-06
NPR1	119.77	0.785534	0.223882	3.5087	0.000450303	0.00321009
TMEM151B	130.204	0.78415	0.208623	3.75868	0.00017081	0.00141189
ISYNA1	818.921	0.784131	0.177718	4.41223	1.02313e-05	0.000123841
DPY19L2P1	81.6544	0.783077	0.239972	3.2632	0.00110163	0.00676226
ID2	2422.14	0.782858	0.144694	5.41043	6.28726e-08	1.39389e-06
PHLDB1	234.684	0.7828	0.186814	4.19026	2.78631e-05	0.0003006
MAPK8IP1	769.482	0.78267	0.145829	5.36704	8.00407e-08	1.72415e-06
COL13A1	128.658	0.782267	0.223791	3.49552	0.000473139	0.00335989
PAK3	173.31	0.782214	0.192087	4.07219	4.65733e-05	0.000468383
SMOX	101.433	0.781862	0.228515	3.42149	0.000622798	0.00421191
PCDHA9	22.8684	0.781799	0.302743	2.58239	0.00981194	0.0393627
GALNT6	288.471	0.780881	0.177837	4.39099	1.12838e-05	0.000134189
TAGLN2	252.245	0.780664	0.173943	4.48804	7.1882e-06	9.06641e-05
HERC6	74.0764	0.780464	0.251446	3.1039	0.00190989	0.0106497
THSD1	27.2281	0.778915	0.299112	2.60409	0.00921177	0.0374125
FOXC1	241.12	0.777488	0.227672	3.41495	0.000637947	0.0042872
UBE2Q2P1	52.1835	0.775992	0.266801	2.90851	0.00363158	0.0178576
FRMPD1	149.001	0.774117	0.199926	3.87201	0.000107942	0.000957889
NMNAT2	178.278	0.77335	0.195504	3.95567	7.63214e-05	0.000714123
RNF217	59.8618	0.773223	0.259048	2.98486	0.00283709	0.0145497
PDE1C	121.362	0.773202	0.218104	3.54511	0.000392455	0.00285127
FAM18B2	85.4409	0.773125	0.23865	3.23958	0.00119708	0.00725159
EFNA3	87.8487	0.772892	0.241295	3.2031	0.00135955	0.00808025
RYR2	675.413	0.772747	0.150327	5.14045	2.74083e-07	5.18388e-06
SAT1	71.6625	0.769921	0.246431	3.12428	0.00178239	0.0101225
FILIP1L	39.6836	0.769508	0.290145	2.65215	0.00799813	0.0334522
MYOG	125.465	0.769452	0.210149	3.66145	0.00025079	0.00195808
AHR	104.512	0.769169	0.241983	3.1786	0.00147987	0.0086755
PGM2L1	352.73	0.768897	0.177874	4.32271	1.54128e-05	0.000176304
ZNF641	403.23	0.768434	0.156198	4.91961	8.67178e-07	1.41456e-05
C1orf106	30.1089	0.768214	0.29941	2.56576	0.010295	0.0406476
PCSK1N	121.77	0.767985	0.239372	3.20833	0.00133509	0.00796424
FLJ43663	92.9071	0.767801	0.233021	3.29498	0.000984275	0.00615017
PPAPDC3	44.7433	0.767725	0.275141	2.7903	0.00526591	0.0241801
GBE1	437.14	0.767717	0.149703	5.12827	2.92411e-07	5.46809e-06
LOC344595	209.511	0.767461	0.180645	4.24845	2.15258e-05	0.000238205
ADAMTS16	25.6823	0.767264	0.299985	2.55768	0.0105374	0.041339
ZDHHC22	141.295	0.766984	0.207726	3.69229	0.000222245	0.00176687
RIN2	52.1605	0.766777	0.272174	2.81723	0.00484395	0.0225719
ANKRA2	262.6	0.766711	0.186451	4.11214	3.9201e-05	0.000404649
ETV4	423.461	0.766439	0.160092	4.7875	1.68872e-06	2.54551e-05
ZNF589	201.858	0.765486	0.17453	4.38599	1.15462e-05	0.000136931
CSRNP1	501.944	0.765248	0.146038	5.24007	1.60517e-07	3.18639e-06
RAB3IP	225.309	0.764665	0.183375	4.16995	3.04667e-05	0.000324083
LRP1B	75.6181	0.764389	0.250267	3.05429	0.00225595	0.0121946
ROR2	142.536	0.763432	0.210142	3.63294	0.000280215	0.00214934
ARNTL	197.029	0.76227	0.201966	3.77425	0.000160489	0.00134119
BBS9	288.164	0.760738	0.161653	4.70599	2.52639e-06	3.59181e-05
YPEL3	167.334	0.760448	0.210965	3.60461	0.000312622	0.0023525
GIPR	109.666	0.760355	0.229495	3.31317	0.000922464	0.00580896
VAT1	1498.47	0.75901	0.127193	5.96739	2.41075e-09	7.15078e-08
DGKA	58.9308	0.758523	0.258057	2.93937	0.00328885	0.0164481
LOC375010	210.034	0.75821	0.200342	3.78458	0.000153971	0.00130275
VILL	127.082	0.758129	0.21193	3.57725	0.000347223	0.00257041
USP35	234.803	0.758082	0.191696	3.95461	7.66611e-05	0.000716782
TBC1D10A	94.0577	0.757511	0.242788	3.12006	0.00180816	0.0102373
PTPN3	368.643	0.757062	0.156585	4.83485	1.33248e-06	2.06647e-05
VWA5B2	60.2268	0.756827	0.269166	2.81175	0.00492727	0.0228604
GRIP2	128.493	0.755659	0.209808	3.60166	0.000316189	0.00237332
HOOK2	266.876	0.75561	0.172353	4.38407	1.1648e-05	0.000137974
NCAM2	220.583	0.755097	0.200303	3.76978	0.000163394	0.00136105
NES	10725.6	0.755018	0.108717	6.94477	3.79066e-12	1.86683e-10
CREB3L4	1127.19	0.754804	0.134904	5.59511	2.20476e-08	5.35745e-07
AKNA	60.2155	0.754358	0.255968	2.94708	0.00320793	0.0161246
CPS1	153.218	0.754265	0.201348	3.74609	0.000179615	0.00147428
TSGA10	60.2568	0.753205	0.260225	2.89443	0.00379844	0.0185406
ERAP1	286.761	0.752793	0.174649	4.31031	1.63022e-05	0.000185492
LPAR2	36.762	0.752775	0.28343	2.65595	0.00790862	0.0331447
SEMA3D	240.664	0.75271	0.201043	3.74403	0.00018109	0.00148356
PNPLA8	531.67	0.752455	0.15092	4.98579	6.17102e-07	1.05046e-05
MAPK11	60.3508	0.752387	0.2619	2.8728	0.0040685	0.0196393
SRCIN1	88.5424	0.751726	0.247759	3.0341	0.00241258	0.0128422
ARVCF	478.179	0.750869	0.171985	4.36589	1.26608e-05	0.000148646
SELM	288.794	0.750698	0.196761	3.81528	0.000136031	0.00117014
FAM171B	345.772	0.750526	0.191777	3.91354	9.09533e-05	0.000826877
DBX2	37.0544	0.749937	0.290645	2.58025	0.00987293	0.0394764
DHRS1	140.04	0.74983	0.209505	3.57906	0.000344835	0.00255566
LINC00324	45.6409	0.749135	0.272593	2.74819	0.0059926	0.0266629
RAB6B	138.193	0.748905	0.20071	3.73128	0.000190509	0.00154632
HSD11B2	24.9099	0.748856	0.299892	2.49708	0.012522	0.0475069
H1FX-AS1	91.7037	0.748852	0.240275	3.11664	0.00182922	0.0103203
SLC4A11	38.736	0.748829	0.28648	2.61389	0.0089517	0.0366174
RTBDN	33.2504	0.748727	0.291124	2.57185	0.0101158	0.0401613
TP53TG1	95.2272	0.748603	0.221774	3.37552	0.000736775	0.00479647
LOC100507053	142.796	0.748223	0.210363	3.55682	0.000375378	0.00274575
IRF1	67.4012	0.747908	0.247714	3.01924	0.00253412	0.013346
HEATR5A	869.805	0.747649	0.15466	4.83414	1.33725e-06	2.06906e-05
CES3	115.584	0.747486	0.220923	3.38347	0.000715764	0.0046938
GLRB	177.127	0.746747	0.188438	3.96282	7.40691e-05	0.000696584
LRRC41	1952.51	0.746362	0.126687	5.89137	3.83013e-09	1.0814e-07
SMPDL3A	153.417	0.745745	0.195668	3.81127	0.000138254	0.00118768
HIP1R	520.678	0.745594	0.162012	4.60208	4.18286e-06	5.56981e-05
SRSF8	1098.66	0.743425	0.123996	5.99557	2.02769e-09	6.15608e-08
SLC12A6	148.962	0.743364	0.219382	3.38845	0.000702887	0.00462722
CCNDBP1	564.514	0.743269	0.153287	4.84886	1.24173e-06	1.95391e-05
PLAGL1	91.7509	0.742081	0.244666	3.03304	0.00242102	0.0128732
LTB4R	100.795	0.741654	0.225345	3.29119	0.000997646	0.00621566
BAMBI	388.533	0.740948	0.163262	4.53839	5.6686e-06	7.34357e-05
TUFT1	280.382	0.740746	0.166067	4.46052	8.17602e-06	0.000101829
TSPYL1	2107.52	0.740626	0.124208	5.96277	2.47998e-09	7.28909e-08
NPR2	157.347	0.740273	0.204169	3.62578	0.000288087	0.00219952
ZSWIM5	452.131	0.740003	0.148928	4.96886	6.73488e-07	1.12711e-05
DGKI	53.834	0.739072	0.264175	2.79767	0.00514734	0.0237116
SLC4A8	1066.71	0.738807	0.158397	4.66429	3.09691e-06	4.28789e-05
FADS3	254.685	0.738169	0.192683	3.83101	0.00012762	0.00110816
INADL	197.328	0.737782	0.19171	3.84844	0.000118875	0.00104485
RBPMS	110.595	0.737381	0.213373	3.45583	0.000548598	0.00379955
CXXC4	108.449	0.737256	0.23592	3.12503	0.00177786	0.0101012
SDC3	370.685	0.736752	0.163463	4.50715	6.57054e-06	8.36917e-05
ERMP1	387.196	0.736751	0.168955	4.36063	1.29688e-05	0.000151573
CLIP4	449.978	0.736657	0.156365	4.71113	2.46349e-06	3.52009e-05
DMRTA1	276.668	0.736506	0.163187	4.51328	6.38339e-06	8.16303e-05
TMEM25	83.5402	0.736162	0.235787	3.12215	0.00179535	0.0101736
RIC3	35.624	0.735507	0.289316	2.54223	0.0110147	0.0428081
MYH15	70.0146	0.735217	0.247155	2.97472	0.00293259	0.0149267
LPCAT2	165.486	0.735111	0.212073	3.46632	0.000527644	0.00369208
KANK4	166.635	0.73453	0.197824	3.71305	0.00020478	0.00164219
PRX	76.548	0.734429	0.257278	2.85461	0.00430897	0.0205921
TRIM7	51.6273	0.733773	0.267978	2.73819	0.00617789	0.0272618
PPP1R3D	51.8165	0.733748	0.265235	2.76641	0.0056678	0.0255348
CHCHD7	171.349	0.733235	0.196662	3.72841	0.000192692	0.00155881
OBSL1	1248.96	0.732439	0.144951	5.05302	4.34889e-07	7.78276e-06
GCNT1	46.7089	0.732363	0.275679	2.65658	0.00789388	0.033102
FOXO3	810.514	0.732097	0.135976	5.38401	7.28446e-08	1.59456e-06
IER2	416.311	0.731694	0.175195	4.17645	2.96098e-05	0.000316795
VCL	1665.94	0.7312	0.118181	6.18714	6.1266e-10	2.06401e-08
PLEKHB1	71.4037	0.729842	0.244106	2.98986	0.00279107	0.0143708
TMEM86A	100.926	0.729747	0.223894	3.25934	0.00111671	0.00682888
ITM2C	1018.67	0.729614	0.15284	4.7737	1.80867e-06	2.69484e-05
KIAA0247	186.624	0.729424	0.190352	3.83197	0.000127121	0.00110528
ALDH5A1	387.271	0.728751	0.152087	4.79168	1.65391e-06	2.49888e-05
ZNF75D	188.321	0.728561	0.192079	3.79303	0.000148822	0.00126332
TMEM91	43.3589	0.728332	0.280861	2.59321	0.00950851	0.0383641
EDNRA	295.354	0.727509	0.182726	3.98142	6.8506e-05	0.000651165
FAM123C	79.8136	0.727211	0.254341	2.8592	0.0042471	0.0203341
CLDN11	73.9781	0.726427	0.240067	3.02594	0.00247861	0.0131341
NRP1	937.099	0.726168	0.150772	4.81634	1.46214e-06	2.23003e-05
DCLK3	206.696	0.726039	0.191635	3.78866	0.000151464	0.00128491
CD59	742.01	0.725731	0.133502	5.43612	5.44528e-08	1.22405e-06
DND1	133.905	0.725379	0.219082	3.31099	0.000929649	0.00584565
PLEKHH1	83.1554	0.724908	0.239846	3.02239	0.00250785	0.0132292
NDRG4	1055.92	0.724782	0.125563	5.77226	7.82163e-09	2.03473e-07
DUSP26	272.275	0.723742	0.180375	4.01243	6.00956e-05	0.00058566
CYLD	474.178	0.723104	0.173397	4.17023	3.04293e-05	0.000323952
FRRS1	218.081	0.722996	0.179358	4.03103	5.55333e-05	0.000546773
GRAMD1B	47.52	0.72272	0.281154	2.57055	0.0101536	0.0402744
APBB3	418.915	0.722623	0.154963	4.66321	3.11312e-06	4.30531e-05
ZBTB42	72.5508	0.721674	0.240048	3.00637	0.00264385	0.0137722
LOC100505854	214.01	0.720855	0.175422	4.10926	3.96927e-05	0.000408228
PTPN5	39.4017	0.720539	0.28486	2.52945	0.0114241	0.0440334
SLIT1	86.9046	0.720005	0.238373	3.0205	0.0025236	0.0133015
INSM2	289.332	0.719913	0.197439	3.64625	0.000266091	0.00206457
ZCCHC24	319.291	0.71927	0.161267	4.46013	8.19106e-06	0.000101918
RARG	143.795	0.719158	0.215564	3.33617	0.000849412	0.00542304
CRHR1	358.015	0.719077	0.165329	4.34938	1.36522e-05	0.000158554
HECW2	216.139	0.718058	0.184331	3.89547	9.80069e-05	0.000881857
SQSTM1	2356.74	0.717293	0.129502	5.53886	3.04442e-08	7.19454e-07
ANKRD13A	1046.27	0.717263	0.1246	5.75653	8.58607e-09	2.20689e-07
ROBO2	82.3164	0.716339	0.249866	2.86689	0.0041453	0.0199206
HSD17B11	506.646	0.716097	0.15184	4.71614	2.4036e-06	3.45379e-05
EGLN3	293.416	0.715844	0.167516	4.27329	1.92611e-05	0.000215734
LACTB	347.31	0.715735	0.158147	4.52576	6.01775e-06	7.74147e-05
GGT7	291.732	0.71566	0.17541	4.07993	4.50484e-05	0.00045482
MAP3K6	199.98	0.714602	0.196003	3.64588	0.000266481	0.00206635
FAM116B	39.5099	0.714478	0.286937	2.49002	0.0127737	0.0482075
EPHX4	37.6934	0.714441	0.282016	2.53333	0.0112985	0.0436479
PLCL2	484.22	0.714417	0.154927	4.61131	4.00136e-06	5.3669e-05
GLI4	120.955	0.714271	0.214079	3.33648	0.000848464	0.00541967
C10orf118	229.565	0.714098	0.206733	3.4542	0.000551925	0.00381445
DOK1	351.178	0.713841	0.182353	3.9146	9.05539e-05	0.000825153
ABHD15	128.737	0.713267	0.208624	3.41891	0.000628717	0.00424507
ARRDC3	1614.36	0.712562	0.158862	4.48541	7.27755e-06	9.1612e-05
ADAMTS17	80.2415	0.7117	0.249663	2.85065	0.00436305	0.0207879
C4orf34	156.2	0.71159	0.199505	3.56677	0.000361407	0.00266471
KIAA0913	536.232	0.710265	0.15692	4.52629	6.00295e-06	7.73787e-05
UST	223.204	0.710057	0.191622	3.7055	0.000210974	0.00168349
RDH10	399.209	0.709658	0.149954	4.73252	2.21751e-06	3.22214e-05
SIDT2	100.574	0.709224	0.220826	3.21169	0.00131957	0.00789354
GLB1L	90.1781	0.708861	0.246447	2.87632	0.00402345	0.0194801
TMTC2	199.264	0.708652	0.183227	3.86761	0.000109906	0.000973309
IDS	901.98	0.708302	0.138309	5.12116	3.0366e-07	5.63759e-06
TPST1	575.85	0.707475	0.150357	4.7053	2.53492e-06	3.59188e-05
FBXO3	422.064	0.707074	0.154684	4.5711	4.85181e-06	6.39457e-05
KALRN	654.363	0.706889	0.135597	5.21315	1.85658e-07	3.62961e-06
SLC48A1	129.508	0.706615	0.208855	3.38328	0.00071625	0.0046938
SRGAP3	194.277	0.706425	0.185049	3.81751	0.000134804	0.00116191
ANKRD18B	113.711	0.705991	0.229827	3.07184	0.00212742	0.0116265
SLC2A11	103.089	0.705833	0.221174	3.1913	0.00141634	0.0083524
TTC30A	229.37	0.705778	0.179752	3.92639	8.62296e-05	0.000790214
PPP1R27	105.111	0.705751	0.235204	3.00059	0.00269456	0.0139799
SMPD1	124.297	0.70555	0.209456	3.36849	0.00075582	0.00490314
TPM1	524.094	0.703493	0.144309	4.87492	1.08853e-06	1.73612e-05
FRMD5	97.7011	0.703468	0.235351	2.98902	0.00279878	0.0144047
PRR24	114.518	0.702195	0.226866	3.0952	0.00196683	0.0108911
TRIM14	43.8271	0.701967	0.274344	2.55871	0.0105062	0.0412542
HSD11B1L	157.657	0.701207	0.22141	3.16701	0.00154016	0.00893955
KDELR3	121.041	0.700564	0.208667	3.35733	0.000787004	0.00507229
ABTB2	75.3819	0.700551	0.253806	2.76018	0.00577689	0.0259357
IER5	818.545	0.699384	0.164352	4.25541	2.08665e-05	0.000231704
RAB3C	98.5544	0.698376	0.221609	3.15139	0.00162498	0.00933945
KIAA1239	676.323	0.697833	0.149008	4.68318	2.82463e-06	3.9444e-05
CD44	46.7934	0.697704	0.274013	2.54624	0.0108889	0.0424313
ENC1	1602.09	0.697684	0.140578	4.96296	6.94281e-07	1.15591e-05
PLEKHG1	158.82	0.697449	0.200573	3.47728	0.000506523	0.00355947
RGS20	69.0617	0.697175	0.242443	2.87562	0.00403234	0.0195094
KCNA4	43.1481	0.696873	0.277469	2.51153	0.0120209	0.0459163
HHAT	288.915	0.69687	0.165743	4.20451	2.61646e-05	0.000284416
CHN2	161.701	0.695886	0.196121	3.54826	0.000387788	0.00282213
LPAR1	660.988	0.695466	0.137008	5.07611	3.85239e-07	6.9911e-06
ARSG	101.998	0.695274	0.229785	3.02576	0.00248006	0.0131364
SLIT2	152.073	0.694893	0.210456	3.30185	0.000960507	0.00601911
NDRG2	184.036	0.694706	0.190754	3.6419	0.000270632	0.0020935
FRZB	378.098	0.69457	0.162023	4.28687	1.81209e-05	0.000204026
KIAA1407	55.1209	0.694483	0.269625	2.57573	0.0100027	0.0398472
FURIN	175.348	0.694074	0.191699	3.62065	0.000293866	0.00223438
FAM13C	78.648	0.693574	0.244627	2.83523	0.00457926	0.0215722
PIK3R1	494.758	0.693507	0.162919	4.25676	2.07412e-05	0.000230511
ELMO1	98.5483	0.692772	0.233743	2.96382	0.00303847	0.0154109
C12orf68	48.9362	0.692099	0.272705	2.5379	0.0111519	0.043211
ATP7B	200.597	0.690569	0.183785	3.75748	0.000171635	0.00141599
DKK3	241.296	0.690325	0.175636	3.93044	8.47915e-05	0.000779248
ATF3	182.383	0.689629	0.198188	3.47966	0.000502045	0.00353596
ZNF570	134.114	0.689484	0.201508	3.42162	0.000622487	0.00421191
RWDD2A	117.556	0.689046	0.214845	3.20717	0.00134047	0.00798893
EMID1	345.667	0.688488	0.17504	3.93333	8.37775e-05	0.00077213
PVR	162.836	0.688207	0.19684	3.49627	0.000471809	0.00335229
CHRNA7	107.237	0.687667	0.224117	3.06834	0.00215251	0.0117487
DGKB	273.933	0.6869	0.189016	3.63409	0.000278968	0.00214257
WDR66	62.1983	0.686621	0.251948	2.72525	0.00642533	0.0281419
PSME1	629.472	0.686485	0.136253	5.03829	4.69701e-07	8.37092e-06
ANXA2	2272.91	0.686416	0.12781	5.3706	7.84745e-08	1.69607e-06
PDIA3P	60.4349	0.68455	0.256255	2.67136	0.00755443	0.031938
DNAH10	109.532	0.684448	0.220757	3.10046	0.0019322	0.0107555
TMEM175	151.767	0.684164	0.198775	3.4419	0.000577654	0.00397579
S1PR2	86.418	0.684003	0.247096	2.76817	0.00563716	0.0254323
LOC219347	49.5371	0.68372	0.266714	2.56349	0.0103626	0.0408183
KLHL24	1454.93	0.683279	0.153589	4.44874	8.63738e-06	0.000106547
FAR2	51.4903	0.683079	0.274969	2.4842	0.0129842	0.0489153
ANKS1B	88.7314	0.682871	0.229268	2.97848	0.00289678	0.0147911
MAP3K1	1345.58	0.682862	0.151577	4.50506	6.63545e-06	8.44351e-05
AHNAK2	144.147	0.682723	0.217782	3.13489	0.00171921	0.00980679
TSPAN2	81.4866	0.681827	0.247919	2.7502	0.00595586	0.0265469
FLVCR2	70.5498	0.681671	0.253528	2.68874	0.00717214	0.030633
COQ10B	378.176	0.681578	0.150431	4.53082	5.87546e-06	7.58869e-05
KDM5B	4118.68	0.681321	0.117354	5.80569	6.41003e-09	1.71239e-07
SH2B3	153.822	0.681124	0.200601	3.39543	0.00068522	0.00453637
KSR1	99.73	0.680685	0.226232	3.00879	0.00262292	0.0137019
SRG7	76.6908	0.680556	0.245449	2.7727	0.0055594	0.0251624
KIF21B	223.93	0.680511	0.183416	3.71021	0.00020709	0.00165659
LDLRAP1	216.753	0.680274	0.185735	3.66261	0.000249661	0.00195235
DALRD3	183.471	0.678981	0.198447	3.42147	0.000622826	0.00421191
HECA	393.576	0.678331	0.162541	4.1733	3.00222e-05	0.00031996
PCDHAC1	152.003	0.678277	0.202153	3.35526	0.000792906	0.00510777
GAA	1034.76	0.677889	0.139988	4.84247	1.28238e-06	2.00808e-05
SH3BP5	441.698	0.67788	0.157649	4.29992	1.70856e-05	0.000193722
MICALL1	485.774	0.677583	0.161519	4.19507	2.72782e-05	0.000295278
NTNG1	261.39	0.676781	0.167152	4.04889	5.14615e-05	0.000511168
SMPD2	144.776	0.675695	0.215685	3.13279	0.00173154	0.00985967
STK17A	771.832	0.675405	0.128853	5.24166	1.59142e-07	3.17373e-06
EPM2A	178.454	0.67508	0.196968	3.42735	0.000609492	0.0041522
ANKRD18A	82.0056	0.67502	0.253552	2.66226	0.0077619	0.032644
PRRX1	1797.6	0.674995	0.168446	4.00719	6.14456e-05	0.000594773
SPAG1	73.4802	0.674624	0.251696	2.68031	0.00735535	0.0312706
ABCC10	270.099	0.674234	0.170051	3.9649	7.34256e-05	0.000692046
C20orf112	265.284	0.674019	0.186378	3.61641	0.000298721	0.00226463
ZFHX4	584.868	0.674018	0.150593	4.47576	7.61406e-06	9.51978e-05
OGFRL1	255.989	0.67396	0.178541	3.77483	0.000160117	0.00133951
MOK	102.012	0.672994	0.221484	3.03856	0.00237709	0.0127241
NINJ1	149.258	0.672661	0.220816	3.04624	0.00231719	0.0124734
TGFBR2	181.325	0.672652	0.198924	3.38146	0.000721022	0.00471772
ACP6	255.666	0.672508	0.177247	3.79418	0.00014813	0.00125994
ADAMTS9	679.486	0.671733	0.143694	4.67474	2.94321e-06	4.09227e-05
DUSP1	441.593	0.671709	0.174821	3.84226	0.000121905	0.00106663
FEZ1	58.2354	0.671654	0.260382	2.57949	0.00989464	0.0395387
CCDC109B	126.946	0.671207	0.20801	3.22681	0.0012518	0.00753708
IGDCC4	161.211	0.669708	0.198356	3.3763	0.000734684	0.00478719
ICA1	528.141	0.668862	0.141734	4.71912	2.36866e-06	3.41866e-05
CRIP2	272.802	0.668724	0.201051	3.32615	0.000880561	0.00558598
ZBTB8B	94.6189	0.668085	0.230708	2.8958	0.00378188	0.0184699
ROGDI	273.198	0.667028	0.184885	3.60781	0.000308798	0.0023328
ABCA7	80.4673	0.666556	0.246228	2.70706	0.0067881	0.0293984
RFNG	524.321	0.664915	0.162665	4.08764	4.35787e-05	0.00044171
ZNF274	265.594	0.664883	0.169489	3.92287	8.75009e-05	0.000800726
ICAM5	122.371	0.664508	0.235328	2.82375	0.00474657	0.0221982
CORO2A	250.38	0.663999	0.176357	3.76509	0.000166492	0.00137973
DLL3	2670.22	0.663569	0.16815	3.94629	7.93725e-05	0.000736794
ZNF846	60.8328	0.663555	0.254811	2.6041	0.00921155	0.0374125
LRRC17	93.6531	0.661973	0.234365	2.82454	0.00473488	0.0221516
SORL1	186.644	0.659443	0.194677	3.38738	0.000705646	0.00463828
CTSO	74.5685	0.657576	0.256515	2.5635	0.0103623	0.0408183
KIAA1462	60.1161	0.657475	0.256978	2.55848	0.010513	0.0412557
ANO4	71.7167	0.657415	0.241482	2.72242	0.0064805	0.0283259
LOC100190938	142.928	0.656503	0.209432	3.13468	0.00172041	0.00980928
CCDC136	229.161	0.656314	0.189244	3.46808	0.000524188	0.00367188
XPC	1939.38	0.6562	0.113283	5.79258	6.93129e-09	1.82893e-07
PPP1R3E	131.81	0.653845	0.204591	3.19587	0.0013941	0.00824458
PEX6	517.082	0.653696	0.153674	4.2538	2.10177e-05	0.000233182
POLR3GL	545.286	0.653556	0.144576	4.5205	6.16949e-06	7.92089e-05
MGAT4A	94.5973	0.652928	0.236158	2.76479	0.00569589	0.0256334
CHST2	1433.96	0.652187	0.14881	4.38267	1.17231e-05	0.000138647
ADC	102.286	0.652106	0.226471	2.87942	0.0039841	0.0193114
ANKRD33B	264.999	0.651578	0.170493	3.82173	0.000132518	0.00114603
MAN2B2	186.215	0.651528	0.191794	3.39701	0.000681262	0.00451944
PDE4B	206.455	0.650981	0.181504	3.58659	0.000335031	0.00248872
C12orf51	492.818	0.65093	0.142902	4.55507	5.23678e-06	6.83218e-05
ANKRD42	98.0071	0.650794	0.221557	2.93737	0.00331007	0.016535
SCARNA2	17319.1	0.650277	0.163846	3.96882	7.2229e-05	0.000682263
PHLDB3	160.838	0.648994	0.212092	3.05996	0.00221367	0.0120079
C10orf10	73.9926	0.648952	0.248404	2.61249	0.00898851	0.0366789
LOC401320	142.285	0.648808	0.198843	3.26292	0.00110272	0.00676576
TBX2	7682.35	0.647461	0.13961	4.63765	3.52397e-06	4.80146e-05
IFI6	195.658	0.647435	0.189217	3.42165	0.000622432	0.00421191
TTC21A	55.9003	0.647234	0.259934	2.48999	0.0127746	0.0482075
PIK3R2	729.578	0.64585	0.153977	4.19446	2.73524e-05	0.000295832
ELAVL3	79.7698	0.645835	0.243757	2.6495	0.00806098	0.0336605
CAPRIN2	434.065	0.645641	0.151982	4.24813	2.15562e-05	0.000238338
ARSA	137.066	0.643702	0.215923	2.98117	0.00287146	0.0146967
TM7SF3	1244.34	0.643692	0.127826	5.0357	4.76104e-07	8.43401e-06
FAT3	273.645	0.643619	0.189429	3.39768	0.000679587	0.0045153
C1D	562.089	0.642841	0.177211	3.62755	0.000286126	0.00218843
PDLIM5	362.785	0.642241	0.178462	3.59875	0.000319753	0.00239175
KIFAP3	785.498	0.641586	0.145122	4.42101	9.82416e-06	0.000119586
ZSWIM3	108.527	0.640576	0.213654	2.99819	0.0027159	0.0140666
APH1B	330.456	0.640245	0.160763	3.98255	6.81808e-05	0.000649252
HEMK1	334.234	0.63998	0.159939	4.0014	6.29698e-05	0.000605891
FPGT	158.097	0.639957	0.210255	3.04372	0.00233671	0.0125575
RHBDD1	138.723	0.639102	0.210077	3.04222	0.00234839	0.0126045
GMIP	108.729	0.638627	0.22008	2.90179	0.00371034	0.0181756
CYB5R1	731.766	0.638539	0.131348	4.86144	1.16534e-06	1.8427e-05
PACS1	107.831	0.637936	0.230085	2.77261	0.00556081	0.0251624
PLXNA3	162.679	0.637614	0.201605	3.16268	0.00156323	0.00904096
ETS2	740.632	0.637595	0.129409	4.92699	8.35044e-07	1.3656e-05
NOG	125.754	0.636854	0.211103	3.0168	0.00255457	0.0134318
SORBS1	103.328	0.636055	0.221567	2.87071	0.00409548	0.0197379
TMEM38A	70.4981	0.635247	0.251535	2.52549	0.0115539	0.044458
TRIL	120.998	0.634641	0.213891	2.96713	0.00300595	0.0152755
NAB2	858.476	0.634572	0.149358	4.24865	2.15059e-05	0.000238189
AHRR	69.4278	0.634407	0.25478	2.49002	0.0127736	0.0482075
PRKAB2	1681.49	0.634158	0.138918	4.56499	4.99517e-06	6.55007e-05
TNIK	568.44	0.633918	0.148665	4.26407	2.00741e-05	0.000224062
DNAJB2	277.465	0.633477	0.164699	3.84627	0.000119928	0.00105267
RNF152	125.636	0.633463	0.208338	3.04056	0.00236141	0.0126639
NUDT22	263.373	0.632751	0.191776	3.29943	0.000968803	0.00606524
IFT57	790.431	0.632043	0.136403	4.63364	3.59284e-06	4.8747e-05
NECAB3	558.132	0.631713	0.14885	4.24394	2.19624e-05	0.000242413
LOC375190	92.9945	0.631376	0.234263	2.69516	0.00703546	0.0301947
DOPEY2	195.571	0.631219	0.183317	3.44331	0.00057463	0.0039586
ANKS1A	746.904	0.630873	0.132928	4.74596	2.07516e-06	3.05311e-05
ITPRIPL2	781.979	0.630147	0.143173	4.4013	1.07607e-05	0.000129038
FTL	12727.8	0.629785	0.13587	4.63521	3.56583e-06	4.84315e-05
CBFA2T2	777.826	0.629498	0.133512	4.7149	2.41826e-06	3.46989e-05
AHSA2	530.057	0.62877	0.142754	4.40457	1.05996e-05	0.000127462
SYP	713.723	0.62834	0.158417	3.96637	7.29761e-05	0.000688312
PLEKHM3	199.834	0.627656	0.1829	3.43168	0.000599855	0.0040952
ERC2	81.4374	0.625589	0.232111	2.69521	0.00703447	0.0301947
MAGED2	1873.64	0.625373	0.137498	4.54823	5.40994e-06	7.05096e-05
STAT3	2421.51	0.625083	0.117488	5.3204	1.03538e-07	2.16173e-06
AP1S3	89.0439	0.624456	0.238098	2.62269	0.00872395	0.0358488
ING4	376.142	0.622775	0.15177	4.10342	4.07092e-05	0.000417212
SEMA3A	188.405	0.62212	0.194279	3.20219	0.00136388	0.0080948
SPOCK3	203.122	0.620295	0.18864	3.28825	0.00100813	0.00627186
ATP6V1G2	75.29	0.62018	0.235223	2.63657	0.00837498	0.0346798
JHDM1D	413.101	0.620075	0.181338	3.41944	0.000627503	0.0042391
KLC4	356.009	0.619956	0.161833	3.83083	0.000127709	0.00110816
MID1	459.621	0.618744	0.173605	3.56409	0.000365123	0.00268496
TMEM50B	259.06	0.618594	0.181021	3.41724	0.000632592	0.00426157
HOXD13	962.658	0.618453	0.132183	4.67877	2.88606e-06	4.02147e-05
ZFY	279.095	0.618305	0.207399	2.98124	0.00287081	0.0146967
CSRNP3	434.657	0.617854	0.182737	3.3811	0.000721954	0.00472142
STOX2	179.411	0.617602	0.189338	3.2619	0.0011067	0.00678373
HR	146.32	0.617285	0.223363	2.76359	0.00571687	0.025711
ATG2A	305.557	0.617253	0.188608	3.27268	0.00106533	0.00655505
PNP	824.464	0.6163	0.132811	4.64042	3.47708e-06	4.7476e-05
DENND3	157.079	0.616124	0.201099	3.06379	0.00218551	0.0118986
MECOM	96.3611	0.615995	0.232566	2.64869	0.00808044	0.0337199
SLC18A3	178.64	0.615709	0.213372	2.88561	0.00390662	0.0190127
CDKAL1	800.427	0.615571	0.129797	4.74257	2.11019e-06	3.09792e-05
DMXL2	1641.3	0.615252	0.151945	4.04918	5.13967e-05	0.000510918
TMEM56	1120.21	0.615115	0.187743	3.27637	0.00105152	0.00648868
BBS12	111.236	0.614686	0.215863	2.84757	0.00440539	0.0209134
SLC10A3	106.016	0.61391	0.223161	2.75098	0.00594175	0.0265382
TBC1D8	793.59	0.612729	0.129719	4.72351	2.31805e-06	3.35689e-05
GOLGA8B	326.248	0.612511	0.160776	3.80972	0.000139124	0.00119356
PDGFC	330.686	0.612114	0.179307	3.41377	0.000640704	0.00430125
GULP1	994.313	0.612033	0.17242	3.54967	0.000385713	0.00281178
HIGD1A	2802.43	0.612018	0.122903	4.9797	6.36841e-07	1.07695e-05
KIAA1024	104.715	0.611817	0.226964	2.69566	0.00702502	0.0301945
ID1	1919.29	0.611392	0.145894	4.19066	2.78142e-05	0.000300324
RETSAT	559.683	0.611291	0.146387	4.17587	2.96855e-05	0.000317079
ID4	288.827	0.61127	0.171335	3.5677	0.000360128	0.0026568
TRIM68	67.7831	0.611248	0.246291	2.48181	0.0130716	0.0492035
FAM46A	390.663	0.610542	0.172023	3.54919	0.000386418	0.00281533
FAM211B	88.431	0.61029	0.240882	2.53357	0.0112908	0.0436428
SLC35A3	865.07	0.61009	0.150521	4.05319	5.05247e-05	0.000503413
MARC2	90.3872	0.609741	0.23309	2.6159	0.00889932	0.0364649
ACSS2	272.866	0.609038	0.177793	3.42555	0.000613556	0.0041742
ZCCHC2	253.478	0.608985	0.17916	3.39911	0.000676055	0.00449415
SKIV2L	1036.55	0.608754	0.1368	4.44994	8.58938e-06	0.000106158
CLSTN2	95.1975	0.608164	0.225107	2.70167	0.00689931	0.0297732
TBC1D19	446.358	0.607835	0.153911	3.94926	7.83948e-05	0.000729292
LOC100506930	130.121	0.607689	0.209452	2.90133	0.00371587	0.0181863
WDR44	362.963	0.607146	0.167646	3.6216	0.000292789	0.00222882
ABAT	378.744	0.607084	0.160944	3.77202	0.000161929	0.0013506
TRIB3	138.317	0.606543	0.221329	2.74045	0.00613548	0.0271117
SERAC1	320.623	0.606205	0.161326	3.75764	0.000171523	0.00141597
ZFAT	239.534	0.604699	0.174671	3.46194	0.000536306	0.00373245
RGL2	488.143	0.604355	0.154466	3.91255	9.13279e-05	0.000829278
TMEM42	248.965	0.604295	0.186077	3.24754	0.00116406	0.00707814
ZNF491	127.298	0.604209	0.206663	2.92365	0.00345958	0.0171689
GPR176	234.35	0.604086	0.176086	3.43064	0.000602162	0.00410789
DNHD1	188.479	0.603126	0.191378	3.1515	0.00162436	0.00933945
GCFC1-AS1	72.465	0.602007	0.241731	2.4904	0.0127599	0.0482075
SEMA6D	444.702	0.601619	0.149537	4.02321	5.74104e-05	0.000562466
RHOB	868.874	0.60123	0.150154	4.00409	6.22561e-05	0.000600367
C15orf58	70.0453	0.600629	0.241435	2.48775	0.0128555	0.0484872
FIG4	436.048	0.600502	0.146774	4.09133	4.28915e-05	0.000435428
LEPROT	635.89	0.599142	0.151312	3.95964	7.50627e-05	0.000705414
MAP7D2	352.12	0.599073	0.157248	3.80975	0.00013911	0.00119356
PARD3B	81.0628	0.598966	0.240063	2.49503	0.0125945	0.0476978
ZNF554	110.747	0.598683	0.223468	2.67906	0.007383	0.0313571
TP53INP2	112.205	0.597638	0.226846	2.63456	0.00842469	0.0348298
SHROOM1	109.895	0.597572	0.216293	2.76278	0.00573105	0.0257658
ANKMY2	342.154	0.596112	0.166661	3.57679	0.000347838	0.00257348
L3MBTL1	81.7181	0.596057	0.237991	2.50453	0.0122613	0.0467515
RNF103	270.21	0.59599	0.168254	3.5422	0.000396808	0.00287965
KREMEN2	108.246	0.595979	0.228305	2.61045	0.00904245	0.0368291
GPRC5C	325.13	0.59586	0.187869	3.17168	0.00151561	0.00882888
GLRX	130.364	0.5954	0.218881	2.7202	0.0065242	0.0284494
NTN4	170.738	0.595168	0.193349	3.07821	0.00208247	0.0114147
CDC42EP2	89.8677	0.593143	0.225989	2.62466	0.00867361	0.035676
KCNK1	85.0092	0.59254	0.230299	2.57291	0.0100847	0.0400748
SLC35F2	238.715	0.592157	0.174589	3.39171	0.000694574	0.00458185
ITPR2	923.249	0.591747	0.146608	4.03624	5.43144e-05	0.000537026
MAPRE3	93.5356	0.590995	0.233647	2.52943	0.0114247	0.0440334
TUBA1A	15065	0.590952	0.117782	5.01734	5.23925e-07	9.18507e-06
SLITRK6	194.199	0.590543	0.195954	3.01367	0.00258105	0.0135387
KIAA0513	113.321	0.59	0.215536	2.73736	0.00619337	0.0273207
FBXL15	305.514	0.589941	0.196028	3.00947	0.00261706	0.0136881
C17orf59	220.974	0.588761	0.193943	3.03574	0.00239948	0.0127989
CELSR3	133.816	0.588237	0.21037	2.7962	0.00517079	0.0238111
HELB	154.804	0.588226	0.213557	2.75442	0.00587963	0.0263237
NR3C1	623.728	0.587901	0.146198	4.02126	5.78889e-05	0.000566722
AHCYL2	470.475	0.587438	0.149431	3.93117	8.45337e-05	0.000777576
PLBD2	120.332	0.587301	0.222186	2.64328	0.00821062	0.0341197
PCNXL2	299.157	0.587028	0.160797	3.65073	0.000261492	0.00203255
ZNF441	176.006	0.586493	0.192606	3.04504	0.00232649	0.012513
RPS6KA5	132.305	0.585589	0.208196	2.81269	0.00491297	0.0228275
ANXA11	272.717	0.585261	0.184617	3.17014	0.00152367	0.0088518
DCHS1	402.466	0.585238	0.174201	3.35956	0.000780657	0.00504544
RELL2	145.955	0.584614	0.215384	2.71429	0.00664171	0.028874
TMEM179B	330.933	0.584147	0.160395	3.64192	0.000270609	0.0020935
SEPN1	347.074	0.583734	0.156175	3.73769	0.000185718	0.0015157
OS9	2439.38	0.583564	0.117001	4.98767	6.1112e-07	1.04718e-05
GOLGB1	2116.5	0.583552	0.139957	4.1695	3.05266e-05	0.000324452
DCAF4	308.804	0.583531	0.159027	3.66938	0.000243144	0.00191298
HGSNAT	259.328	0.58323	0.169468	3.44153	0.000578436	0.00397844
SCN3B	251.082	0.582914	0.179258	3.25182	0.00114668	0.00699226
ZNF558	356.583	0.582819	0.155682	3.74365	0.000181363	0.00148485
FAM161B	122.43	0.580489	0.213133	2.7236	0.00645745	0.0282538
PPP2R2B	454.465	0.579732	0.161466	3.59043	0.000330134	0.00246085
NISCH	1898.85	0.579144	0.126734	4.56974	4.88332e-06	6.42298e-05
SEMA6A	345.852	0.578933	0.181579	3.18834	0.00143094	0.00842691
NPC1	303.451	0.578754	0.165918	3.48818	0.000486317	0.0034421
OSBPL7	334.414	0.57865	0.166894	3.46717	0.000525967	0.00368234
PCMTD1	530.44	0.578467	0.156377	3.69917	0.000216305	0.00172333
SCARNA6	535.789	0.578252	0.178418	3.241	0.00119113	0.00722313
LAMC1	3441.95	0.577713	0.122437	4.71843	2.37669e-06	3.42642e-05
MAP2	984.394	0.576883	0.155246	3.71592	0.000202463	0.00162562
RHOBTB3	3965.96	0.576674	0.139139	4.1446	3.40412e-05	0.000358265
HBP1	539.137	0.576643	0.150592	3.82919	0.000128568	0.00111336
JAK3	90.8527	0.57639	0.232782	2.47609	0.013283	0.0497463
C14orf167	86.4375	0.576195	0.229011	2.51601	0.0118691	0.045404
ADAMTS13	112.77	0.575609	0.216727	2.65592	0.0079092	0.0331447
RNASET2	280.792	0.575487	0.170859	3.36819	0.000756624	0.00490589
SGSH	271.291	0.574931	0.173236	3.31878	0.000904125	0.00571019
LBH	443.968	0.574748	0.149334	3.84874	0.000118725	0.00104424
RABEP2	252.297	0.573897	0.171533	3.3457	0.000820738	0.00526865
DGKH	106.166	0.573795	0.226849	2.52941	0.0114255	0.0440334
ZNF692	411.577	0.573185	0.16223	3.53316	0.000410631	0.00296994
MCAM	133.783	0.573137	0.21182	2.70577	0.00681465	0.0294867
PPP1R13B	132.501	0.572594	0.207918	2.75394	0.00588819	0.0263437
CCDC144A	142.804	0.57258	0.222132	2.57766	0.00994732	0.0396878
CBLB	262.066	0.571744	0.174406	3.27823	0.00104462	0.00645531
LENG8	485.666	0.571474	0.165274	3.45773	0.000544748	0.00377897
PLEC	1199.92	0.57126	0.155753	3.66773	0.000244711	0.00192062
MYRIP	197.744	0.570977	0.180912	3.15611	0.00159888	0.0092141
IRF2BP2	1923.75	0.569406	0.1202	4.73715	2.16749e-06	3.16013e-05
HIVEP2	158.258	0.568719	0.198159	2.87002	0.00410449	0.0197613
REV3L	1311.89	0.568183	0.141181	4.02449	5.70998e-05	0.000560699
KIRREL2	111.373	0.567529	0.210696	2.69359	0.0070687	0.0302914
TRIM3	168.922	0.56718	0.206287	2.74947	0.0059691	0.0265859
KDM6B	98.9926	0.567177	0.220675	2.5702	0.0101641	0.0402881
OSBPL3	987.705	0.566492	0.13961	4.05767	4.95637e-05	0.000494985
SLC35E4	115.577	0.566378	0.219565	2.57954	0.00989316	0.0395387
ATP9A	508.932	0.565162	0.150897	3.74535	0.000180145	0.00147769
ADCYAP1R1	903.406	0.564732	0.136345	4.14193	3.44397e-05	0.000361869
ACCN2	128.361	0.564171	0.216137	2.61025	0.0090477	0.0368389
FRG1B	195.312	0.56387	0.188383	2.99322	0.00276054	0.0142477
CRELD1	253.052	0.56331	0.183466	3.07038	0.00213787	0.0116737
PSD	194.034	0.5632	0.19034	2.95891	0.00308732	0.0156096
DLG4	345.786	0.562911	0.16838	3.3431	0.000828485	0.00531048
THBS3	1970.62	0.562467	0.128382	4.38118	1.18036e-05	0.000139471
GPD1L	711.464	0.562194	0.138093	4.07112	4.67873e-05	0.000469437
WSB1	1531.84	0.561514	0.14401	3.89913	9.65409e-05	0.000870487
MBOAT7	494.036	0.561334	0.163464	3.43399	0.000594776	0.00406698
PLCD3	282.996	0.560928	0.184749	3.03616	0.00239611	0.0127915
PODXL	269.114	0.560469	0.177614	3.15554	0.001602	0.00922793
SYNJ1	157.831	0.55932	0.215822	2.59158	0.00955363	0.038522
PIK3AP1	328.996	0.559245	0.159738	3.50101	0.000463504	0.00329872
MAPKAPK3	520.222	0.559188	0.147864	3.78178	0.000155713	0.00131404
ZC3H7A	562.033	0.558962	0.158729	3.52149	0.000429125	0.00308124
GADD45G	224.551	0.55881	0.201028	2.77976	0.00543991	0.0248115
C10orf114	296.665	0.558041	0.173823	3.21039	0.00132553	0.00792189
TECPR1	396.612	0.558015	0.168335	3.31491	0.000916742	0.00577575
CHMP1B	652.996	0.557896	0.133831	4.16866	3.06395e-05	0.000325384
MAN1A2	2957.01	0.557447	0.119967	4.64666	3.37352e-06	4.62577e-05
C1orf115	272.399	0.557381	0.186178	2.99381	0.00275519	0.0142258
ISCU	932.928	0.556953	0.136069	4.09317	4.2551e-05	0.000432795
LOC100507043	193.031	0.556921	0.189908	2.93259	0.00336149	0.0167594
SNX21	167.211	0.556822	0.198455	2.80579	0.00501932	0.0232047
DSEL	303.102	0.556148	0.172482	3.22438	0.00126244	0.00759763
PDE4DIP	158.032	0.555467	0.202662	2.74086	0.00612794	0.0270969
YIPF1	613.719	0.555119	0.140049	3.96374	7.37852e-05	0.00069442
EFNA4	276.294	0.553824	0.16593	3.33769	0.000844769	0.00540141
GARNL3	240.784	0.553399	0.176467	3.13598	0.00171278	0.00977877
TUBB2A	241.576	0.552932	0.18544	2.98174	0.00286616	0.0146812
RIPK1	135.336	0.552543	0.209947	2.63182	0.00849287	0.0350854
SLC7A14	235.007	0.551003	0.18869	2.92015	0.00349859	0.0173224
SMPD3	116.11	0.550623	0.212611	2.58981	0.00960287	0.0387085
LPPR5	247.413	0.549953	0.177686	3.09507	0.00196763	0.0108911
LCA5	163.801	0.549801	0.207777	2.64611	0.00814234	0.0338905
C14orf79	132.382	0.549026	0.213941	2.56625	0.0102806	0.040603
NTPCR	790.131	0.548251	0.133624	4.10292	4.07968e-05	0.000417779
MOV10	411.843	0.548081	0.152793	3.58708	0.000334396	0.00248543
STK10	503.438	0.547822	0.141828	3.86258	0.000112196	0.000991317
KIF13B	369.061	0.547643	0.162048	3.3795	0.000726177	0.00473944
EFHC1	482.873	0.547258	0.163705	3.34296	0.000828901	0.00531048
BIVM	115.392	0.546143	0.21515	2.53843	0.0111351	0.0431588
TMEM68	256.855	0.545913	0.178532	3.0578	0.00222972	0.012068
ABCB6	1032.96	0.545437	0.139777	3.90219	9.53258e-05	0.000861337
TUBG2	169.033	0.543933	0.216529	2.51205	0.012003	0.0458687
NXT2	171.19	0.543431	0.192009	2.83023	0.00465142	0.0218483
ELF1	146.354	0.543394	0.210307	2.58381	0.00977156	0.0392535
SEMA3F	118.257	0.543087	0.211686	2.56553	0.0103018	0.0406496
ARID4A	347.12	0.542185	0.170998	3.17071	0.00152065	0.00884651
MAP1LC3B	229.71	0.541362	0.170371	3.17756	0.00148522	0.008695
C1orf50	236.128	0.540842	0.176096	3.0713	0.00213132	0.0116429
C1orf85	262.473	0.540715	0.177352	3.04883	0.00229736	0.0123821
FZD4	455.629	0.5406	0.152398	3.54728	0.000389231	0.00283103
ATG16L2	123.859	0.540354	0.213182	2.5347	0.0112543	0.04355
PSAP	5395.57	0.540281	0.115187	4.69045	2.72599e-06	3.8232e-05
OSCP1	216.877	0.539295	0.190904	2.82495	0.00472873	0.0221389
MRAS	468.099	0.539118	0.142474	3.78397	0.000154344	0.00130505
TBC1D9	293.187	0.539039	0.169912	3.17246	0.00151153	0.00881307
SERINC3	694.782	0.538431	0.144608	3.72339	0.000196569	0.00158619
STX1A	203.625	0.538286	0.177171	3.03823	0.00237974	0.0127252
NAV1	311.841	0.537926	0.163339	3.2933	0.000990184	0.00617811
MAP3K9	195.294	0.537669	0.181711	2.95892	0.00308723	0.0156096
MAN1A1	2527.74	0.537431	0.144278	3.72496	0.000195344	0.00157828
BLZF1	626.579	0.536968	0.14907	3.60213	0.000315617	0.00237182
HSD17B4	1678.75	0.536514	0.130482	4.11179	3.92602e-05	0.000404685
COLEC12	146.184	0.535376	0.207814	2.57623	0.00998843	0.0398272
DOCK9	248.347	0.534556	0.17134	3.11985	0.0018094	0.0102398
RPS6KA1	629.841	0.534366	0.148875	3.58937	0.000331483	0.00246805
LOC146880	425.327	0.533979	0.154157	3.46386	0.00053249	0.00371226
ACSF2	490.535	0.533939	0.156361	3.41479	0.00063832	0.00428748
PIGM	571.932	0.533871	0.158482	3.36866	0.000755358	0.00490261
PHF16	635.613	0.533376	0.149167	3.5757	0.000349298	0.00258133
NPC2	188.456	0.532771	0.190646	2.79455	0.00519714	0.0239154
ZFYVE1	280.67	0.531711	0.171143	3.10682	0.00189109	0.010586
PLEKHO2	201.388	0.530091	0.183286	2.89215	0.00382611	0.0186545
BRMS1L	336.282	0.529624	0.167552	3.16096	0.00157252	0.00908244
RNF19B	452.85	0.529618	0.161632	3.27669	0.0010503	0.00648424
EPHA4	129.271	0.529378	0.205542	2.57552	0.010009	0.0398601
LOC389765	117.538	0.528896	0.211964	2.49522	0.0125879	0.0476939
ITSN2	344.161	0.528888	0.160133	3.3028	0.000957253	0.00600167
DCAF12L2	168.461	0.52888	0.190634	2.77433	0.0055316	0.0250876
GATS	245.644	0.5288	0.175356	3.01557	0.00256496	0.0134735
MARCH11	863.744	0.528436	0.153677	3.43861	0.000584709	0.00401303
CCS	259.291	0.527924	0.180774	2.92035	0.00349635	0.017318
TMC6	186.893	0.527864	0.193808	2.72365	0.00645658	0.0282538
NLGN2	138.562	0.527628	0.210928	2.50146	0.0123683	0.047066
CACNA2D1	528.068	0.527549	0.166666	3.16531	0.0015492	0.00898399
HECTD3	419.343	0.52747	0.157324	3.35277	0.000800065	0.00514618
IP6K2	946.105	0.527445	0.125152	4.21444	2.50395e-05	0.000273337
PCK2	323.626	0.527394	0.161766	3.26023	0.00111322	0.00681724
EIF2C4	631.3	0.527273	0.149804	3.51976	0.000431943	0.00309803
CCDC92	167.287	0.527081	0.193738	2.72058	0.00651673	0.0284264
TK2	155.959	0.527069	0.193191	2.72822	0.00636769	0.0279273
COL7A1	125.369	0.526751	0.204595	2.57461	0.0100354	0.0399156
RNPEP	1055.79	0.526275	0.137375	3.83094	0.000127653	0.00110816
NFATC4	1333.63	0.526212	0.135154	3.89342	9.88397e-05	0.000887494
EIF2AK3	762.638	0.52542	0.131709	3.98924	6.62867e-05	0.000633085
RABGGTA	277.577	0.524618	0.186961	2.80602	0.00501571	0.0231963
LOC100506033	190.753	0.523738	0.188702	2.77548	0.00551209	0.0250343
PROM1	255.652	0.522957	0.167775	3.11702	0.00182689	0.0103116
CAMKV	1060.8	0.522075	0.130106	4.01269	6.00318e-05	0.000585481
LOC100505761	160.609	0.521684	0.196728	2.65181	0.00800627	0.0334753
PEX16	368.8	0.521206	0.186254	2.79836	0.00513622	0.0236688
TST	167.591	0.520901	0.195348	2.66653	0.00766386	0.0323054
PPOX	747.701	0.520737	0.143205	3.6363	0.000276581	0.00213062
AKAP5	285.942	0.520542	0.182876	2.84643	0.00442128	0.0209559
KLHL13	2553.5	0.519421	0.120895	4.29646	1.73545e-05	0.000196253
CPXM1	686.353	0.519323	0.13897	3.73694	0.000186275	0.00151928
MAP3K12	321.559	0.519092	0.167474	3.09954	0.00193818	0.0107702
ECEL1	265.727	0.518895	0.19003	2.7306	0.00632191	0.0277927
TXNDC11	268.036	0.517933	0.166999	3.10141	0.00192602	0.0107257
UNC13B	1484.44	0.517777	0.117016	4.42482	9.65228e-06	0.000117716
IFI44L	265.802	0.517359	0.179749	2.87823	0.00399907	0.0193767
ELOVL4	398.858	0.516742	0.159641	3.23689	0.00120839	0.00729956
FN1	2768.79	0.516228	0.139096	3.7113	0.000206197	0.0016515
APLP1	868.11	0.515955	0.155409	3.31999	0.000900213	0.00569106
RHOBTB1	827.297	0.515808	0.139561	3.69592	0.000219091	0.00174287
CABYR	131.481	0.5153	0.199636	2.5812	0.00984573	0.0394288
CIC	238.822	0.514543	0.188155	2.73467	0.00624428	0.0274889
RBM24	230.361	0.514512	0.193578	2.6579	0.00786286	0.0329933
EML3	442.334	0.514014	0.161915	3.17459	0.00150048	0.00876445
CHST8	540.011	0.513751	0.171722	2.99177	0.00277369	0.0143041
LMBR1L	313.385	0.513453	0.165911	3.09475	0.0019698	0.0108911
AMOT	526.269	0.513313	0.168943	3.03838	0.00237856	0.0127241
AAK1	194.624	0.512858	0.184777	2.77555	0.00551091	0.0250343
LOC729683	747.927	0.512694	0.171007	2.99808	0.00271684	0.0140666
GALK2	386.709	0.512598	0.149582	3.42687	0.000610591	0.00415749
SYTL4	495.112	0.512052	0.153892	3.32735	0.000876757	0.00557018
FAM188A	528.785	0.511963	0.141549	3.61685	0.000298206	0.00226206
MYO18A	470.229	0.511847	0.151203	3.38517	0.000711339	0.00467332
SYT11	3117.73	0.511677	0.115906	4.4146	1.01196e-05	0.00012272
TMEM108	352.857	0.511478	0.161693	3.16327	0.00156009	0.00903087
DAK	353.717	0.511076	0.178036	2.87063	0.00409657	0.0197379
LOC283392	188.084	0.510778	0.184393	2.77006	0.00560464	0.0253121
KIAA0195	1145.94	0.510731	0.145203	3.51735	0.000435881	0.00312281
SERINC1	3178.36	0.509873	0.151307	3.36979	0.000752248	0.00488488
TYK2	723.021	0.5097	0.143149	3.56062	0.000369974	0.00271238
NAIF1	175.239	0.509503	0.192376	2.64848	0.00808551	0.0337302
PPP1R15A	292.809	0.508915	0.169073	3.01003	0.00261221	0.0136736
SDCCAG8	271.961	0.508742	0.168576	3.01787	0.00254559	0.0133955
WDR45	219.03	0.508439	0.18305	2.7776	0.00547613	0.02495
ITGA1	982.264	0.508358	0.154432	3.29179	0.000995535	0.0062055
NEO1	1029.22	0.5078	0.133828	3.79442	0.000147992	0.00125959
RFX3	123.658	0.507239	0.204558	2.47968	0.0131499	0.0493968
NPNT	167.313	0.506881	0.195301	2.59539	0.00944837	0.0381931
SNCA	149.463	0.506371	0.196396	2.57831	0.00992852	0.0396307
DNAJC3	426.164	0.506093	0.158951	3.18396	0.00145277	0.00853599
C11orf68	211.814	0.505903	0.195922	2.58216	0.00981832	0.0393633
GBA2	882.847	0.505287	0.140283	3.60192	0.000315881	0.00237242
MFSD10	530.53	0.504783	0.167799	3.00826	0.00262747	0.0137145
NBR1	2661.67	0.504693	0.125529	4.02054	5.80646e-05	0.000568012
LNPEP	522.865	0.503953	0.163106	3.08973	0.00200339	0.0110422
PSME2	824.472	0.503767	0.13537	3.72141	0.000198116	0.00159568
TBX20	619.57	0.503236	0.144656	3.47885	0.000503574	0.00354479
C9orf25	384.41	0.503054	0.170811	2.9451	0.00322853	0.0162092
ZNF470	277.339	0.502615	0.17633	2.85043	0.00436606	0.0207879
FGGY	146.347	0.502045	0.197764	2.5386	0.0111296	0.0431507
MKNK2	1156.43	0.50172	0.150694	3.3294	0.000870337	0.00554019
FAM113A	767.745	0.501678	0.146033	3.43536	0.000591759	0.00404849
AK5	219.623	0.500547	0.182598	2.74125	0.00612065	0.027074
UBE2E3	1166.36	0.499961	0.125408	3.98668	6.70032e-05	0.000638982
TBX3	420.264	0.499785	0.16239	3.07768	0.0020862	0.0114303
GPAA1	845.875	0.499542	0.164407	3.03845	0.00237795	0.0127241
IGF2R	3320.24	0.49906	0.124358	4.0131	5.9926e-05	0.00058489
ADAMTS5	777.456	0.499055	0.179384	2.78204	0.00540184	0.02469
KCTD7	242.39	0.498808	0.170691	2.92228	0.00347478	0.0172244
STX7	347.998	0.498572	0.160515	3.10608	0.00189584	0.0105991
HERC2P2	495.631	0.498543	0.154125	3.23466	0.00121788	0.00735345
CD276	735.276	0.498449	0.147817	3.37207	0.000746065	0.00485206
KLHL21	738.07	0.498415	0.139978	3.56068	0.000369897	0.00271238
AP5B1	185.157	0.498149	0.193041	2.58054	0.00986471	0.0394661
GRINA	632.987	0.498097	0.163861	3.03976	0.00236768	0.0126817
SPARC	2947.29	0.497745	0.110808	4.49197	7.05671e-06	8.94427e-05
COCH	537.169	0.497594	0.145596	3.41765	0.000631651	0.0042582
ACOX1	2506.53	0.497375	0.121273	4.10128	4.10869e-05	0.000420415
FBXW9	222.939	0.497266	0.177654	2.79907	0.00512493	0.0236252
LYPD6	337.679	0.496876	0.168783	2.94387	0.00324131	0.0162477
ACADVL	2196.22	0.495964	0.122877	4.03627	5.43082e-05	0.000537026
ZNF704	1163.32	0.495627	0.158917	3.11878	0.00181599	0.0102636
PLXNB1	269.924	0.495353	0.189337	2.61625	0.00889015	0.0364389
CST3	455.942	0.494227	0.188122	2.62716	0.00860996	0.0354481
ARMC5	257.662	0.49329	0.19323	2.55287	0.0106841	0.0417621
NDST2	272.329	0.492308	0.169908	2.89749	0.00376158	0.0183847
ZNF167	226.851	0.491967	0.174782	2.81474	0.00488161	0.0227146
MEF2D	273.452	0.491951	0.181529	2.71004	0.00672754	0.0291685
SLC50A1	502.202	0.490959	0.159098	3.08589	0.00202942	0.0111618
RBM20	153.551	0.490717	0.196186	2.50128	0.0123745	0.047066
SERINC5	454.986	0.490485	0.144199	3.40144	0.000670325	0.00446525
HECTD2	506.862	0.489964	0.164118	2.98545	0.00283165	0.0145275
CYB561D1	244.821	0.489625	0.169165	2.89437	0.00379922	0.0185406
PPP1R21	296.465	0.488444	0.160929	3.03514	0.00240421	0.0128084
ZNF419	162.672	0.48821	0.187875	2.59859	0.00936069	0.0379099
MARC1	526.644	0.487933	0.138058	3.53426	0.000408925	0.00295926
NBEAL1	409.654	0.487515	0.179333	2.71848	0.0065582	0.0285591
DCP1B	200.572	0.487276	0.185153	2.63175	0.00849467	0.0350854
CCBL1	259.216	0.486363	0.17434	2.78973	0.00527521	0.0242142
GPRIN3	706.329	0.485028	0.161457	3.00408	0.00266389	0.013844
LMBRD2	321.631	0.484733	0.174839	2.77245	0.00556363	0.0251624
RELN	1037.67	0.484033	0.135549	3.57092	0.000355735	0.00262739
MTHFR	387.968	0.483498	0.155509	3.10912	0.00187646	0.0105178
BCKDK	356.598	0.483227	0.171814	2.81251	0.00491572	0.0228321
BVES	473.124	0.482796	0.155442	3.10595	0.00189672	0.0105991
NCOA4	2980.05	0.48253	0.12913	3.73677	0.000186397	0.00151932
STK38L	639.593	0.481701	0.178052	2.7054	0.0068223	0.02951
WDR17	469.001	0.481649	0.172044	2.79958	0.00511696	0.0236138
CAMK4	477.714	0.481638	0.151327	3.18276	0.00145879	0.00856362
NACC2	184.011	0.481177	0.184531	2.60757	0.00911869	0.0370928
SAT2	407.432	0.480511	0.151488	3.17195	0.0015142	0.00882464
CTSA	754.115	0.480219	0.141158	3.402	0.000668953	0.00446303
NCOA1	502.426	0.480144	0.152803	3.14224	0.00167662	0.00960631
NFXL1	510.191	0.479309	0.158489	3.02425	0.00249252	0.0131914
RFX7	386.633	0.478677	0.166674	2.87193	0.00407969	0.0196786
NUCB2	291.816	0.478051	0.170636	2.80159	0.00508521	0.0234841
FAM89A	379.264	0.477905	0.16583	2.88189	0.00395296	0.0192037
CDK9	535.927	0.477179	0.149792	3.18561	0.00144448	0.00849117
ACSS1	226.458	0.477141	0.171906	2.77559	0.00551017	0.0250343
SMAD9	756.82	0.476959	0.171252	2.78513	0.00535056	0.0244903
IRGQ	1500.67	0.476913	0.122379	3.89702	9.73822e-05	0.00087746
SMAD7	983.135	0.476656	0.129952	3.66795	0.000244506	0.00192018
CCDC23	249.285	0.475532	0.187288	2.53904	0.0111157	0.043132
TPRA1	492.72	0.475335	0.17029	2.79132	0.00524929	0.0241124
LRIF1	332.897	0.47531	0.160106	2.96871	0.00299049	0.0152154
NYNRIN	347.772	0.475151	0.155835	3.04907	0.00229551	0.0123773
ZNF672	437.253	0.47429	0.158296	2.99623	0.00273341	0.0141303
ZNF608	736.677	0.473927	0.137123	3.45621	0.000547819	0.00379619
CHPF2	557.456	0.473232	0.152074	3.11186	0.00185911	0.0104416
ITGA2	195.25	0.472944	0.187762	2.51884	0.0117741	0.0450939
MAP9	598.019	0.472489	0.173298	2.72646	0.00640185	0.0280486
RGL1	385.867	0.472167	0.162479	2.90601	0.00366066	0.0179732
IRF2BPL	741.602	0.471422	0.150951	3.12301	0.00179014	0.0101494
FBN2	1309.89	0.470921	0.141751	3.32219	0.000893153	0.00565196
MFSD11	627.549	0.470844	0.135271	3.48075	0.000500014	0.00352358
SNX7	506.072	0.470763	0.140924	3.34055	0.000836113	0.00535137
SCARB2	3965.68	0.470452	0.126618	3.71553	0.00020278	0.00162716
PIP4K2C	477.718	0.469945	0.144534	3.25144	0.00114822	0.00699833
RFK	668.583	0.469403	0.145719	3.2213	0.00127613	0.00766567
PLD3	2595.73	0.468929	0.147032	3.1893	0.00142619	0.00840281
NUDT16	464.791	0.468915	0.147552	3.17797	0.00148311	0.00868806
ACTN1	759.505	0.468335	0.134251	3.48851	0.000485713	0.00343971
RTN2	287.809	0.467484	0.169409	2.7595	0.00578896	0.0259628
FBXO8	1202.82	0.4672	0.137917	3.38754	0.000705219	0.00463784
ZNF440	352.976	0.466944	0.158656	2.94311	0.0032493	0.0162629
GK5	584.381	0.46673	0.162461	2.87288	0.0040675	0.0196393
DCAF8	2882.81	0.466631	0.112824	4.13594	3.53506e-05	0.000370836
VARS2	517.364	0.465123	0.145151	3.20441	0.00135339	0.00805107
PHF15	308.928	0.464821	0.176687	2.63076	0.00851948	0.0351766
LOC100128252	196.519	0.463353	0.178289	2.59888	0.00935272	0.0378895
OCIAD2	448.06	0.463101	0.147862	3.13197	0.00173637	0.00988282
MAN2B1	829.5	0.462756	0.153602	3.01269	0.00258945	0.0135655
DHRS7	469.313	0.462456	0.14277	3.23916	0.00119882	0.00725535
RFX5	3525.45	0.462066	0.109072	4.23633	2.27207e-05	0.000250355
SPSB3	387.451	0.460977	0.178513	2.58232	0.00981399	0.0393627
LRRC57	171.529	0.46048	0.184736	2.49264	0.0126798	0.0479926
C2orf56	375.666	0.46048	0.168747	2.72882	0.00635618	0.0278864
DCAF5	509.264	0.460229	0.147368	3.12298	0.00179029	0.0101494
RNPC3	243.064	0.459763	0.179138	2.56653	0.010272	0.0405942
TAF11	1198.02	0.458375	0.120494	3.80413	0.000142306	0.00121762
FLNC	1272.13	0.458354	0.149706	3.06169	0.00220091	0.0119618
CCDC165	417.063	0.457705	0.15076	3.03599	0.00239745	0.0127934
PPAPDC2	229.917	0.454787	0.174136	2.61168	0.00900985	0.0367544
SGK223	252.545	0.454009	0.181768	2.49774	0.0124989	0.0474456
GALT	344.172	0.453327	0.161951	2.79916	0.00512352	0.0236252
DOPEY1	599.366	0.453222	0.15479	2.92798	0.00341167	0.0169768
JAK1	2228.35	0.45314	0.128696	3.52101	0.000429902	0.00308511
DUSP14	411.687	0.452892	0.158487	2.8576	0.00426862	0.0204144
COG1	658.841	0.452723	0.140885	3.21343	0.00131161	0.00785324
CYTH2	1046.86	0.451826	0.13585	3.32591	0.000881306	0.00558796
KDM4A	1675.87	0.450019	0.116164	3.87401	0.000107061	0.00095204
ERCC6	390.353	0.449517	0.161595	2.78175	0.00540667	0.0247033
SNORA25	219.219	0.449474	0.176114	2.55218	0.0107052	0.0418321
TMEM67	383.859	0.449437	0.172633	2.60342	0.00922986	0.0374742
SNAI2	278.505	0.448212	0.179554	2.49625	0.0125514	0.0475905
CYHR1	410.471	0.44803	0.163067	2.74752	0.00600477	0.0267079
LEPRE1	945.045	0.44667	0.139248	3.20773	0.00133788	0.00797717
TSC22D1	756.26	0.445199	0.144037	3.09086	0.00199578	0.011005
TYSND1	447.806	0.445137	0.163452	2.72335	0.00646238	0.0282573
HEXA	1016.15	0.444631	0.129499	3.43347	0.000595914	0.0040726
C20orf194	380.362	0.444365	0.155705	2.85389	0.00431878	0.0206314
KAT2A	619.07	0.443078	0.140779	3.14733	0.00164769	0.00945029
SAMD8	544.973	0.442638	0.151442	2.92283	0.00346867	0.0172007
LONRF1	522.489	0.442483	0.140175	3.15666	0.0015959	0.00920101
VAV3	475.568	0.442443	0.157136	2.81567	0.00486756	0.0226655
SLC35D1	716.205	0.441858	0.155887	2.83449	0.00458995	0.0216146
TSPAN33	228.806	0.441615	0.172952	2.5534	0.0106676	0.0417357
TARBP1	628.284	0.440353	0.141934	3.10251	0.00191885	0.010695
HCN3	252.895	0.440262	0.171299	2.57013	0.0101659	0.0402881
PTPRM	228.199	0.439534	0.171461	2.56346	0.0103635	0.0408183
BECN1	950.206	0.439333	0.133564	3.28931	0.00100432	0.00625121
ZNF335	434.75	0.439316	0.164859	2.6648	0.00770343	0.0324404
ECE1	500.094	0.439257	0.153143	2.86828	0.0041271	0.0198553
BAX	1224.61	0.439218	0.144833	3.03257	0.00242477	0.0128806
VPS16	751.505	0.438611	0.143555	3.05534	0.00224805	0.012157
PLTP	465.688	0.438532	0.155103	2.82737	0.00469326	0.0220048
FNBP1	324.625	0.437185	0.162615	2.68847	0.00717806	0.0306481
PNMA1	634.874	0.436719	0.137009	3.18752	0.00143497	0.00844683
SETD4	282.152	0.435844	0.167163	2.6073	0.00912597	0.0371107
YIPF3	692.031	0.435633	0.143679	3.032	0.00242941	0.0128963
IPO13	1082.3	0.434857	0.128362	3.38773	0.000704731	0.00463699
AACS	470.017	0.43458	0.157047	2.7672	0.00565398	0.0254834
RHOQ	721.12	0.433651	0.153599	2.82327	0.00475365	0.0222153
MMP15	277.29	0.43362	0.165891	2.61389	0.00895175	0.0366174
PPP2R5A	505.17	0.433379	0.142664	3.03777	0.00238339	0.0127394
H6PD	290.706	0.433146	0.165721	2.61371	0.0089564	0.0366174
ADCY6	441.062	0.432822	0.148712	2.91048	0.00360879	0.0177658
EPB41L3	583.356	0.432495	0.139175	3.10757	0.00188635	0.0105641
ZNF514	280.705	0.432318	0.162964	2.65284	0.00798175	0.0333944
FHOD1	336.928	0.432298	0.164509	2.62781	0.00859353	0.035408
SAMD11	2274.66	0.431998	0.157066	2.75042	0.00595194	0.0265469
SULT4A1	239.996	0.431531	0.171925	2.50999	0.0120735	0.04609
PRR13	550.747	0.431344	0.141143	3.05608	0.00224251	0.0121321
CTDSP2	1251.18	0.431123	0.126774	3.40071	0.000672106	0.0044725
SLC12A2	1141.99	0.430982	0.140771	3.06157	0.00220176	0.0119618
MFGE8	353.581	0.430575	0.168479	2.55566	0.0105988	0.0415293
PGM3	1575.78	0.430231	0.142063	3.02845	0.00245811	0.0130308
MADD	926.287	0.429825	0.129621	3.31601	0.000913113	0.00575569
DYRK3	388.405	0.429322	0.159789	2.6868	0.00721397	0.0307409
POLR2A	713.282	0.429057	0.143643	2.98697	0.00281762	0.014467
ZDHHC9	320.748	0.427817	0.157786	2.71138	0.00670038	0.02908
ARHGAP42	1170.42	0.427309	0.149012	2.86761	0.00413582	0.0198898
RNFT1	448.515	0.426318	0.166582	2.5592	0.0104912	0.0412205
TTC30B	416.492	0.426194	0.155076	2.74829	0.00599063	0.0266629
CRISPLD1	536.754	0.425967	0.162027	2.62898	0.00856417	0.0353272
RUSC2	314.346	0.425744	0.165551	2.57168	0.0101205	0.0401676
PLA2G12A	431.734	0.425734	0.152446	2.79268	0.00522736	0.0240341
MOAP1	836.57	0.425292	0.128464	3.31059	0.000931007	0.00584985
PDP1	523.679	0.424945	0.155175	2.7385	0.00617209	0.027254
FBXO9	942.532	0.424757	0.125201	3.3926	0.000692337	0.00457183
EPB41L4B	248.373	0.423652	0.167214	2.53359	0.0112902	0.0436428
MUS81	531.437	0.423591	0.169269	2.50247	0.0123329	0.0469551
WNT5A	655.71	0.422904	0.157001	2.69363	0.00706776	0.0302914
PCYOX1L	343.721	0.421267	0.160251	2.62879	0.0085688	0.035335
ASTN2	369.514	0.421128	0.163933	2.5689	0.0102023	0.0404051
CDH24	555.163	0.42039	0.156465	2.6868	0.00721409	0.0307409
AMFR	1734.54	0.420349	0.119218	3.52588	0.000422073	0.00303399
PIK3R3	4310.59	0.420007	0.125584	3.34444	0.000824498	0.00529016
PRSS12	6302.91	0.419942	0.111062	3.78116	0.000156098	0.00131556
CCNG1	3000.66	0.419892	0.130851	3.20893	0.00133229	0.00795492
CYP2U1	395.401	0.419172	0.15723	2.66598	0.00767644	0.0323478
PACRGL	755.011	0.418079	0.134194	3.11548	0.00183649	0.0103522
TNRC6C	510.461	0.418055	0.150236	2.78265	0.00539175	0.0246526
BAZ2A	677.29	0.418046	0.159772	2.61652	0.00888315	0.0364218
ITGAV	1741.35	0.417696	0.158586	2.63387	0.00844175	0.0348891
ZER1	475.143	0.417574	0.15603	2.67624	0.00744529	0.031549
EMB	495.752	0.417136	0.153073	2.72508	0.00642857	0.0281465
VPS13C	2325.47	0.417005	0.147554	2.82612	0.00471161	0.0220747
WDFY1	1179.57	0.414941	0.148585	2.79261	0.00522852	0.0240341
PTPRO	317.128	0.414176	0.158242	2.61735	0.00886143	0.0363558
MARCH6	1535.16	0.413399	0.148886	2.77662	0.0054928	0.024993
FKBP10	2711.65	0.413287	0.128306	3.22111	0.00127696	0.00766709
CCNL2	2315.44	0.41281	0.111953	3.68734	0.000226609	0.00179713
MXRA7	2205.16	0.412354	0.11837	3.48359	0.000494738	0.00349212
FBXW7	838.632	0.411016	0.139264	2.95134	0.00316401	0.0159476
ZNF84	2225.57	0.410846	0.153776	2.67172	0.00754639	0.0319145
AMPD2	1248.83	0.409829	0.1316	3.11419	0.00184448	0.0103927
CCDC142	303.197	0.40878	0.160553	2.54607	0.0108944	0.0424313
QTRT1	661.907	0.408501	0.143396	2.84875	0.00438909	0.0208668
ZFYVE27	475.969	0.408205	0.164621	2.47966	0.0131506	0.0493968
SCARNA21	798.903	0.408154	0.155214	2.62962	0.00854792	0.0352715
PIGV	297.204	0.407653	0.159923	2.54906	0.0108014	0.0421567
LAYN	1057.41	0.407074	0.128711	3.16271	0.0015631	0.00904096
TRAK1	915.885	0.407041	0.12862	3.16469	0.00155248	0.00899896
TPRG1L	316.931	0.406898	0.162956	2.49698	0.0125257	0.0475072
SLC26A11	402.82	0.40683	0.15663	2.59739	0.00939344	0.0380187
HEATR5B	1119.31	0.406599	0.13957	2.91322	0.00357721	0.0176373
ARF5	1653.42	0.406485	0.153756	2.64371	0.00820029	0.0340987
LMO4	3972.4	0.406115	0.117383	3.45973	0.000540715	0.00375503
MXRA8	481.603	0.405628	0.155671	2.60567	0.00916942	0.0372757
P4HA2	411.047	0.404632	0.145948	2.77244	0.0055637	0.0251624
B3GNT2	379.541	0.4046	0.159766	2.53245	0.0113268	0.0437312
KCNQ1OT1	467.133	0.403954	0.16018	2.52187	0.0116733	0.0448009
LZTR1	872.645	0.40395	0.142649	2.83177	0.00462908	0.0217592
CCDC71L	677.03	0.403863	0.141455	2.85507	0.00430273	0.0205699
ARL6IP5	758.247	0.403449	0.14978	2.69361	0.00706819	0.0302914
DDX26B	580.053	0.402869	0.145521	2.76846	0.00563222	0.0254189
CTHRC1	747.855	0.402601	0.134786	2.98697	0.00281761	0.014467
SLC10A4	423.16	0.401873	0.15529	2.58788	0.00965688	0.0388534
EFR3A	950.174	0.401864	0.152225	2.63994	0.00829202	0.0344026
ENDOD1	343.044	0.400773	0.153402	2.61256	0.00898664	0.0366789
TUB	1840.89	0.400408	0.120509	3.32265	0.000891682	0.00564542
PCOLCE2	472.644	0.399995	0.141743	2.82197	0.00477298	0.0222895
GDF11	394.783	0.399564	0.158548	2.52015	0.0117305	0.0449795
MTMR9	1116.07	0.399367	0.145743	2.74021	0.00614001	0.0271224
ARID3B	489.24	0.399088	0.145576	2.74144	0.00611701	0.0270672
HSPA4L	925.788	0.398122	0.141562	2.81235	0.00491812	0.022835
TSPAN9	425.65	0.39779	0.154057	2.5821	0.00982024	0.0393633
RRBP1	1021.15	0.397585	0.137128	2.89938	0.00373903	0.0182821
RNF13	752.815	0.397535	0.13628	2.91703	0.00353377	0.0174765
MIB1	3120.4	0.396794	0.148332	2.67504	0.00747203	0.0316415
GNAI2	995.879	0.396421	0.145655	2.72164	0.00649585	0.0283545
TMEM59	2926.27	0.395655	0.110366	3.58495	0.000337141	0.00250151
SNX14	1075.03	0.395486	0.143804	2.75018	0.00595624	0.0265469
PILRB	598.828	0.394611	0.142577	2.7677	0.00564536	0.0254604
KANSL1L	937.642	0.393198	0.132534	2.96677	0.00300945	0.0152818
ASXL3	579.49	0.392908	0.137035	2.86721	0.00414102	0.0199075
EXD2	476.745	0.392862	0.145528	2.69957	0.00694296	0.0299289
GPC2	817.353	0.392806	0.135272	2.90381	0.00368647	0.0180862
OSTM1	706.303	0.392224	0.153696	2.55196	0.010712	0.0418459
LOC339290	694.359	0.391294	0.134207	2.9156	0.00355005	0.0175301
FKBP9	1215.78	0.388753	0.121571	3.19775	0.00138504	0.00821232
SFRP1	1756.65	0.388531	0.130236	2.9833	0.00285163	0.0146184
C11orf95	1414.69	0.388004	0.123521	3.1412	0.00168258	0.00963618
PLXNB2	1718.25	0.386774	0.138171	2.79924	0.00512232	0.0236252
PCMTD2	1233.16	0.385668	0.139087	2.77286	0.00555668	0.0251624
PIGS	900.55	0.384655	0.13093	2.93786	0.00330484	0.0165153
FAM117A	459.248	0.384612	0.15054	2.55489	0.0106222	0.0416085
NAT9	1087.45	0.384358	0.133382	2.88165	0.00395602	0.0192082
SEPT8	1184.32	0.384132	0.124089	3.09562	0.00196405	0.0108858
SLC25A39	3587.2	0.382683	0.134171	2.8522	0.00434176	0.0207104
DMTF1	954.122	0.382311	0.148966	2.56643	0.0102752	0.0405943
TANC2	550.443	0.381618	0.150704	2.53224	0.0113336	0.0437445
CXCR4	515.44	0.381416	0.152413	2.50252	0.0123312	0.0469551
ATP6V0D1	756.532	0.3812	0.146541	2.60132	0.00928667	0.0376456
SYT14	740.906	0.380406	0.150089	2.53454	0.0112596	0.04355
EIF4A2	5688.87	0.379858	0.137046	2.77176	0.00557535	0.0252063
NOMO1	1629.74	0.379596	0.122456	3.09986	0.00193615	0.0107635
PTK7	1680.35	0.378307	0.141008	2.68288	0.00729917	0.0310522
GABARAP	2215.81	0.377693	0.116537	3.24096	0.00119126	0.00722313
SVIL	422.187	0.377507	0.152177	2.48071	0.013112	0.0492959
IGFBP5	676.58	0.377194	0.139842	2.69729	0.00699072	0.0300844
ARHGAP36	3131.16	0.376087	0.124977	3.00926	0.00261889	0.0136881
CAND2	480.61	0.375635	0.146709	2.56041	0.0104548	0.0410899
HRASLS	491.469	0.375524	0.151219	2.48332	0.0130166	0.049023
RGNEF	935.374	0.375141	0.131089	2.86173	0.00421341	0.0201953
ITM2B	624.036	0.375003	0.150605	2.48998	0.0127749	0.0482075
HIBADH	821.104	0.375002	0.129101	2.90471	0.00367599	0.0180416
GSTK1	656.331	0.374041	0.144506	2.58841	0.00964203	0.0388178
CALCOCO2	705.973	0.371288	0.132413	2.80402	0.00504697	0.0233158
PI4K2A	659.499	0.370669	0.13518	2.74203	0.006106	0.0270277
FLII	1339.82	0.370534	0.132651	2.79329	0.00521743	0.0240002
MFAP4	1486.6	0.369692	0.146474	2.52395	0.0116045	0.0445767
SERPINE2	453.979	0.369189	0.149035	2.47719	0.013242	0.04964
MYL12A	983.651	0.368848	0.126327	2.91978	0.00350278	0.0173365
FLNA	10300.6	0.364895	0.123813	2.94714	0.00320724	0.0161246
DPYSL3	2388.03	0.364017	0.110752	3.28678	0.0010134	0.00629307
SLC7A2	3102.21	0.363135	0.145584	2.49434	0.0126193	0.0477779
RSAD1	877.007	0.362157	0.130568	2.7737	0.00554224	0.0251182
ZBTB40	1126.21	0.36146	0.135772	2.66227	0.00776166	0.032644
RNF213	1812.92	0.3608	0.131154	2.75097	0.00594199	0.0265382
CLK1	958.683	0.358806	0.140929	2.546	0.0108964	0.0424313
ZXDC	928.502	0.358432	0.129118	2.77601	0.00550306	0.0250285
UBE2Q2	1138.86	0.358137	0.135521	2.64266	0.00822568	0.0341713
PRCP	574.803	0.357003	0.139288	2.56305	0.0103757	0.0408412
APEH	784.121	0.353498	0.139747	2.52956	0.0114206	0.0440334
SRXN1	551.683	0.35302	0.140082	2.5201	0.0117322	0.0449795
UBA1	3884.67	0.350992	0.115254	3.04539	0.0023238	0.0125038
SCRN1	3055.73	0.349857	0.118274	2.95801	0.00309628	0.0156488
HIPK3	1018.19	0.349624	0.129366	2.7026	0.00688002	0.0297098
UFC1	1906.89	0.349435	0.122924	2.84269	0.00447344	0.0211587
TLE4	1170.5	0.349274	0.129768	2.69153	0.00711257	0.030456
TRPC4AP	1345.49	0.348949	0.128204	2.72183	0.0064921	0.0283545
AP1S1	798.58	0.348483	0.131663	2.64678	0.00812627	0.0338345
PPCS	539.445	0.347111	0.139379	2.4904	0.0127599	0.0482075
NINL	1098.63	0.3464	0.125294	2.76469	0.00569763	0.0256334
SPATS2L	1123.33	0.34447	0.128228	2.68637	0.0072232	0.0307695
MTMR3	825.395	0.344396	0.128825	2.67336	0.00750954	0.0317899
CHD7	3739.87	0.34168	0.126636	2.69813	0.00697303	0.0300411
FBXO22	983.387	0.340173	0.129408	2.62868	0.00857177	0.0353359
SEPT6	1083.57	0.339913	0.131301	2.58881	0.00963072	0.0387965
ATP6V0A1	1040.39	0.335591	0.127121	2.63994	0.00829202	0.0344026
MYL12B	1377.26	0.328397	0.124587	2.63587	0.00839212	0.0347174
DUSP3	1476.63	0.32802	0.119899	2.7358	0.00622297	0.0274325
WDR1	1557.22	0.325	0.120188	2.70409	0.00684925	0.0295868
LOC642852	819.226	0.324363	0.131071	2.47471	0.0133346	0.0498857
CDK5RAP3	3624.04	0.324244	0.118171	2.74384	0.00607249	0.026944
FAM115A	1248.08	0.32376	0.128261	2.52422	0.0115955	0.0445555
SKP1	2710.28	0.319919	0.113855	2.80989	0.00495578	0.0229685
CPT1C	1262.88	0.315983	0.122674	2.5758	0.0100008	0.0398472
BSDC1	1600.65	0.315759	0.124582	2.53455	0.0112592	0.04355
TMEM164	1411.81	0.309908	0.124935	2.48056	0.0131178	0.0493035
TMEM66	2525.02	0.309611	0.114879	2.6951	0.00703677	0.0301947
LDB1	2332.06	0.308199	0.121397	2.53876	0.0111246	0.0431441
FAM134C	2131.4	0.303072	0.115778	2.61771	0.00885222	0.0363296
PTGFRN	1723.73	0.289585	0.114741	2.52381	0.0116091	0.0445812
SPTBN1	5093.71	0.271368	0.109362	2.48136	0.013088	0.0492491

## Sheet: IMR5-75_EPZ-6438+DAC
	baseMean	log2FoldChange	lfcSE	stat	pvalue	padj
ACRC	355.037	4.08353	0.204892	19.9301	2.22967e-88	5.75389e-85
COL9A2	171.631	4.017	0.238019	16.8768	6.66414e-64	7.81704e-61
CCKAR	288.675	3.96656	0.201175	19.717	1.54205e-86	3.31619e-83
ADCYAP1	194.021	3.68925	0.219932	16.7745	3.74897e-63	4.03108e-60
PRPH	1696.86	3.67514	0.151522	24.2548	5.88582e-130	3.79723e-126
NEFH	139.026	3.53406	0.241508	14.6333	1.72254e-48	9.26081e-46
SCG2	511.515	3.48588	0.182758	19.0737	4.17729e-81	7.69994e-78
STAT6	119.985	3.34217	0.245628	13.6067	3.65546e-42	1.3168e-39
RGS4	902.161	3.22563	0.175775	18.3509	3.24634e-75	4.18876e-72
TPM2	361.175	3.17594	0.191662	16.5705	1.13801e-61	1.12951e-58
SYT4	278.803	3.16717	0.216254	14.6456	1.43701e-48	8.06162e-46
TUBA4A	204.101	3.11881	0.213418	14.6136	2.30001e-48	1.18037e-45
APOE	136.456	3.01143	0.236257	12.7464	3.26456e-37	8.25933e-35
DKK1	340.253	3.00508	0.298879	10.0545	8.77568e-24	7.44951e-22
ENPP2	624.215	2.95917	0.160863	18.3956	1.42513e-75	2.04316e-72
PLEKHA6	146.353	2.95342	0.221064	13.36	1.03527e-40	3.33953e-38
FST	194.325	2.91809	0.201169	14.5056	1.11602e-47	5.33335e-45
COL3A1	2591.29	2.90616	0.11623	25.0036	5.58931e-138	7.21189e-134
PLCL1	113.469	2.88094	0.245162	11.7512	6.96515e-32	1.16716e-29
ITGA3	127.082	2.82295	0.237021	11.9101	1.04866e-32	1.96099e-30
KLHDC8A	124.695	2.7898	0.238563	11.6942	1.36479e-31	2.20123e-29
SEL1L3	259.332	2.77758	0.188511	14.7343	3.88132e-49	2.27639e-46
COL1A1	174.353	2.75888	0.220237	12.5269	5.32256e-36	1.22638e-33
COL2A1	313.056	2.74231	0.185886	14.7527	2.95817e-49	1.90165e-46
DUSP2	347.309	2.74148	0.196962	13.9188	4.86755e-44	2.026e-41
MYO15B	221.776	2.6881	0.20412	13.1692	1.31931e-39	3.78289e-37
HEY1	99.283	2.67739	0.248373	10.7797	4.29065e-27	5.03294e-25
ART5	120.248	2.67161	0.229505	11.6407	2.5583e-31	4.02558e-29
CDKN1A	5257.17	2.67066	0.125615	21.2606	2.62893e-100	8.48028e-97
VGF	191.188	2.66784	0.227011	11.7521	6.89196e-32	1.16716e-29
AKR1C3	131.399	2.65611	0.228433	11.6275	2.98614e-31	4.64219e-29
MEST	1373.42	2.6467	0.124324	21.2887	1.44513e-100	6.21551e-97
PPP1R17	66.4082	2.61442	0.262554	9.95767	2.33475e-23	1.84818e-21
NTNG2	184.087	2.61049	0.216255	12.0713	1.49687e-33	2.92637e-31
MDGA1	110.053	2.59071	0.246328	10.5173	7.18996e-26	7.66711e-24
PDE4D	906.564	2.58225	0.16259	15.8819	8.4548e-57	7.27282e-54
SPHK1	340.833	2.57375	0.177644	14.4882	1.43848e-47	6.62882e-45
SERPINI1	117.112	2.56719	0.227391	11.2898	1.47386e-29	2.18588e-27
NEFM	1630.19	2.55821	0.138882	18.42	9.07232e-76	1.46325e-72
CHD5	105.011	2.55188	0.242776	10.5112	7.66854e-26	7.97961e-24
PARM1	170.957	2.55148	0.203448	12.5412	4.44201e-36	1.0421e-33
INPP5D	68.1947	2.54754	0.266827	9.54752	1.3284e-21	8.40212e-20
CHGB	806.237	2.53784	0.159135	15.9477	2.95355e-57	2.72212e-54
DUSP6	198.573	2.5355	0.199122	12.7334	3.85671e-37	9.56983e-35
NEURL	79.7074	2.53455	0.256505	9.88109	5.02833e-23	3.6864e-21
WFIKKN2	403.13	2.52804	0.173019	14.6113	2.3785e-48	1.18037e-45
CORO6	183.299	2.52757	0.205364	12.3078	8.22716e-35	1.76925e-32
YY2	76.6903	2.52708	0.261152	9.67668	3.78811e-22	2.58613e-20
FBLN2	192.825	2.526	0.196334	12.8658	7.01264e-38	1.88508e-35
MSX1	323.547	2.51745	0.191159	13.1694	1.31642e-39	3.78289e-37
NT5E	156.123	2.51373	0.207012	12.1429	6.25472e-34	1.26101e-31
MYO5B	345.505	2.50912	0.170113	14.7497	3.09029e-49	1.90165e-46
CA5B	184.104	2.50418	0.20389	12.282	1.13132e-34	2.39302e-32
DBH	103.207	2.49459	0.252324	9.88646	4.76599e-23	3.53423e-21
SV2B	68.9251	2.48935	0.264826	9.39992	5.46031e-21	3.24674e-19
GPAT2	150.226	2.47944	0.225582	10.9913	4.20721e-28	5.27045e-26
DIO2	195.182	2.47594	0.22275	11.1153	1.05662e-28	1.45038e-26
ZNF780B	89.8339	2.47552	0.263287	9.40238	5.33418e-21	3.18643e-19
THSD7A	223.727	2.46801	0.208418	11.8416	2.37867e-32	4.26278e-30
SYTL1	77.7489	2.43729	0.262109	9.29874	1.42125e-20	7.97318e-19
IGFBP3	444.899	2.42244	0.180444	13.4249	4.32379e-41	1.48391e-38
TGFB2	278.543	2.41699	0.1819	13.2875	2.73562e-40	8.40422e-38
RBM44	58.9615	2.38808	0.272135	8.77534	1.70383e-18	7.68688e-17
PROCR	58.9463	2.37492	0.27779	8.54931	1.23821e-17	5.08811e-16
CCDC144B	60.5662	2.3615	0.269012	8.77842	1.65789e-18	7.50589e-17
LINC00470	80.1076	2.31781	0.262449	8.83147	1.03309e-18	4.79497e-17
CSPG4	104.373	2.31653	0.240512	9.63166	5.87724e-22	3.86908e-20
GSN	140.339	2.31575	0.224384	10.3205	5.69521e-25	5.56706e-23
OSBPL10	119.534	2.30754	0.221404	10.4223	1.96175e-25	1.96221e-23
ARID5B	63.9293	2.30194	0.270783	8.50104	1.87894e-17	7.57623e-16
TCP11L2	66.2013	2.29654	0.263742	8.70754	3.10531e-18	1.3675e-16
GRM4	97.0801	2.28707	0.240895	9.49404	2.22249e-21	1.37869e-19
SGPP2	140.156	2.284	0.227393	10.0443	9.7352e-24	8.21002e-22
CATSPERG	91.4139	2.28319	0.244553	9.3362	9.98543e-21	5.75187e-19
TP53INP1	1584.23	2.2817	0.164889	13.8377	1.50856e-43	5.89848e-41
MTUS1	141.086	2.27835	0.216062	10.5449	5.36426e-26	5.81639e-24
CDKN1C	227.812	2.27477	0.215989	10.5319	6.15919e-26	6.62267e-24
EFNA1	63.7734	2.2656	0.274518	8.25302	1.54444e-16	5.6135e-15
S100A4	70.4394	2.24586	0.261178	8.59898	8.04307e-18	3.36947e-16
NEUROD2	54.4716	2.2454	0.276253	8.12806	4.36216e-16	1.48509e-14
PRSS23	102.36	2.22841	0.231221	9.63757	5.54861e-22	3.6904e-20
CALB1	90.327	2.22399	0.246611	9.01824	1.91134e-19	9.55893e-18
LUM	275.703	2.22051	0.197887	11.2211	3.21189e-29	4.70943e-27
COL12A1	115.422	2.21676	0.230405	9.62116	6.50954e-22	4.26358e-20
LOXL4	226.425	2.18979	0.198189	11.049	2.2161e-28	2.94787e-26
BNC1	63.2522	2.17162	0.268752	8.08036	6.4576e-16	2.15861e-14
PLAT	62.9566	2.16906	0.263635	8.22751	1.91138e-16	6.86979e-15
NAV2	159.593	2.16735	0.207391	10.4505	1.45686e-25	1.48015e-23
ACTA2	195.275	2.16621	0.199952	10.8337	2.38449e-27	2.84881e-25
CRABP2	682.114	2.16256	0.158938	13.6063	3.67393e-42	1.3168e-39
JAG1	125.649	2.15884	0.21736	9.93206	3.01938e-23	2.30527e-21
COL14A1	343.402	2.15565	0.171245	12.5881	2.45539e-36	5.97772e-34
DTNA	148.596	2.14121	0.215555	9.93344	2.97801e-23	2.28722e-21
JUP	569.097	2.1393	0.163888	13.0534	6.07667e-39	1.66824e-36
CLU	472.874	2.13602	0.182037	11.734	8.52939e-32	1.41096e-29
ABCB1	63.617	2.12561	0.267464	7.9473	1.90627e-15	5.98459e-14
HOPX	79.9267	2.1227	0.247764	8.56745	1.058e-17	4.37543e-16
CHODL	429.789	2.11776	0.158665	13.3473	1.22744e-40	3.86283e-38
SLC27A2	101.252	2.11716	0.228075	9.28274	1.65179e-20	9.22643e-19
LOXL3	239.137	2.11433	0.188811	11.1981	4.16404e-29	5.96984e-27
HERC5	347.218	2.10546	0.167364	12.5801	2.71725e-36	6.49271e-34
SERINC2	235.689	2.10012	0.209452	10.0267	1.16294e-23	9.68094e-22
GRB14	52.0652	2.0982	0.272612	7.69663	1.397e-14	3.9101e-13
OPTN	246.532	2.09791	0.178137	11.7769	5.13239e-32	9.07168e-30
ZNF772	101.931	2.09588	0.244231	8.58153	9.36184e-18	3.88411e-16
XKR7	51.5149	2.09428	0.277404	7.54955	4.3678e-14	1.12941e-12
PTPRN	290.223	2.0847	0.188995	11.0305	2.72445e-28	3.44643e-26
CHGA	6324.37	2.08018	0.133298	15.6055	6.67485e-55	5.38285e-52
C4orf32	97.8445	2.07969	0.249786	8.32591	8.36822e-17	3.13881e-15
RGAG4	58.1846	2.0783	0.270568	7.68123	1.57565e-14	4.39105e-13
ABCA9	81.985	2.07384	0.252326	8.21888	2.05406e-16	7.34171e-15
METTL7A	673.571	2.06971	0.148732	13.9157	5.08505e-44	2.05039e-41
LOC286467	181.679	2.06852	0.200038	10.3407	4.61321e-25	4.54383e-23
SPATA18	324.635	2.06663	0.170745	12.1036	1.01088e-33	2.00667e-31
FUCA1	129.7	2.06279	0.213413	9.6657	4.21728e-22	2.84898e-20
SCN9A	1135.85	2.06193	0.166341	12.3958	2.75502e-35	6.02509e-33
GJA1	587.827	2.06169	0.165413	12.4639	1.17478e-35	2.65934e-33
SNAP91	137.955	2.06006	0.222571	9.25574	2.12746e-20	1.17814e-18
TNNI1	137.078	2.05676	0.23325	8.81783	1.16695e-18	5.35844e-17
UNC79	147.343	2.05226	0.216329	9.48676	2.38337e-21	1.47142e-19
HDAC9	205.408	2.05097	0.199598	10.2755	9.08698e-25	8.62127e-23
DUSP4	551.003	2.0478	0.152547	13.4241	4.37019e-41	1.48391e-38
ELFN1	133.584	2.04041	0.227538	8.96733	3.03788e-19	1.49041e-17
GRIA2	193.885	2.03294	0.218105	9.32094	1.15318e-20	6.58386e-19
GRASP	111.344	2.03229	0.232686	8.73406	2.45688e-18	1.08939e-16
EXOC3L1	87.2129	2.03101	0.247995	8.1897	2.61878e-16	9.20712e-15
CHRD	91.7036	2.02851	0.245725	8.25522	1.51621e-16	5.52647e-15
LGR4	893.82	2.02367	0.15348	13.1852	1.06725e-39	3.20249e-37
CLSTN3	317.162	2.02323	0.191025	10.5915	3.26483e-26	3.63156e-24
MSX2	264.809	2.0225	0.185239	10.9183	9.42531e-28	1.15824e-25
ARC	120.837	2.01686	0.227786	8.85418	8.4298e-19	3.9697e-17
H19	431.059	2.00489	0.17091	11.7307	8.87416e-32	1.44941e-29
SIX1	213.05	2.00087	0.187681	10.661	1.54846e-26	1.76812e-24
ACVR1C	86.3186	1.99829	0.246388	8.11036	5.04715e-16	1.70928e-14
RASAL2	50.5487	1.99782	0.274461	7.27905	3.3618e-13	7.87246e-12
MVP	243.962	1.99693	0.197339	10.1193	4.53731e-24	3.95574e-22
GPC3	483.653	1.98678	0.155615	12.7672	2.49829e-37	6.44708e-35
TRIM59	178.292	1.98575	0.213026	9.32162	1.1458e-20	6.57077e-19
EPHA2	360.459	1.98337	0.164902	12.0276	2.54575e-33	4.90265e-31
STRA6	191.32	1.98245	0.192121	10.3188	5.79466e-25	5.6217e-23
KCNJ2	94.3436	1.9795	0.244387	8.09984	5.50308e-16	1.84912e-14
SLC44A3	188.225	1.96366	0.199354	9.8501	6.84733e-23	4.93581e-21
INSRR	52.7219	1.96364	0.275843	7.1187	1.08946e-12	2.41951e-11
BBC3	221.657	1.96297	0.199873	9.82108	9.1359e-23	6.51274e-21
KCND2	213.285	1.95555	0.196184	9.96792	2.10583e-23	1.68767e-21
BCAN	85.8988	1.95532	0.254694	7.67716	1.6266e-14	4.51356e-13
ETV5	302.992	1.95341	0.16595	11.7711	5.50043e-32	9.59081e-30
DEPTOR	69.2549	1.95214	0.251964	7.7477	9.35733e-15	2.70106e-13
ILDR2	236.363	1.947	0.197356	9.86545	5.87694e-23	4.28419e-21
PCLO	136.043	1.94256	0.222386	8.73512	2.43403e-18	1.08297e-16
PGF	491.708	1.94119	0.178412	10.8804	1.42964e-27	1.74024e-25
SH3PXD2A	261.596	1.93899	0.19503	9.94204	2.73179e-23	2.13626e-21
IFI30	127.521	1.93875	0.228981	8.46687	2.52085e-17	1.00081e-15
PARP9	74.5406	1.92901	0.26171	7.37078	1.69627e-13	4.08534e-12
CCDC144C	52.6391	1.9217	0.275	6.98802	2.78786e-12	5.78324e-11
S100A13	111.698	1.92096	0.22817	8.41898	3.79776e-17	1.48944e-15
SDK2	75.9812	1.9201	0.262803	7.30624	2.74721e-13	6.51604e-12
SLC43A2	216.962	1.89905	0.19112	9.93641	2.89066e-23	2.23343e-21
MAN1C1	52.1413	1.89883	0.269191	7.05385	1.74034e-12	3.69657e-11
APC2	203.101	1.89635	0.209751	9.04094	1.55332e-19	7.79863e-18
ACSL6	76.8885	1.88907	0.248764	7.59382	3.10619e-14	8.24674e-13
RHBG	296.12	1.88479	0.175022	10.7689	4.82906e-27	5.61345e-25
PDZD7	39.8966	1.88417	0.286375	6.57937	4.72458e-11	8.29406e-10
MYO6	445.354	1.88115	0.173061	10.8698	1.60481e-27	1.93522e-25
TSPYL2	639.187	1.88092	0.143042	13.1494	1.71473e-39	4.80982e-37
ZNF776	108.966	1.87891	0.240719	7.80541	5.93069e-15	1.74314e-13
CRTAC1	119.478	1.87139	0.215688	8.67639	4.0853e-18	1.77484e-16
C1orf228	94.8226	1.87059	0.236465	7.91063	2.56087e-15	7.90501e-14
MAP6	202.253	1.86701	0.198262	9.41691	4.64549e-21	2.78794e-19
BTG2	1490.43	1.86685	0.12657	14.7496	3.09499e-49	1.90165e-46
ZNF467	55.6103	1.8636	0.264493	7.04592	1.84237e-12	3.89706e-11
NNAT	11356.2	1.86172	0.129584	14.3669	8.35164e-47	3.71591e-44
KIAA1324L	324.594	1.85777	0.168271	11.0403	2.44083e-28	3.18122e-26
KCNV2	38.9997	1.85119	0.288233	6.42256	1.34005e-10	2.16947e-09
RPP25	132.873	1.84989	0.222424	8.31697	9.02421e-17	3.3653e-15
NDRG1	131.262	1.84677	0.214923	8.59268	8.49638e-18	3.54786e-16
RGS5	430.813	1.8453	0.167236	11.0341	2.61534e-28	3.34116e-26
NEDD9	136.175	1.83938	0.208005	8.84296	9.32177e-19	4.35793e-17
PYY	266.447	1.83617	0.209907	8.74752	2.18085e-18	9.77065e-17
DUSP10	312.635	1.8314	0.173384	10.5627	4.43714e-26	4.89337e-24
TNNT1	63.1628	1.83058	0.26812	6.82748	8.64199e-12	1.6844e-10
HPSE	86.0395	1.8294	0.248483	7.36228	1.80791e-13	4.34404e-12
ANKRD65	84.1915	1.82883	0.255953	7.14519	8.98735e-13	2.01326e-11
EMILIN2	245.579	1.82087	0.189017	9.63333	5.78267e-22	3.82635e-20
FAM133A	50.4375	1.81952	0.274795	6.62136	3.55911e-11	6.39598e-10
DDB2	138.891	1.81846	0.210575	8.63567	5.83829e-18	2.48619e-16
TCEA3	53.852	1.80813	0.273745	6.60517	3.97071e-11	7.03765e-10
FAM84B	441.2	1.80301	0.153237	11.7661	5.83366e-32	1.00362e-29
LPPR4	1124.78	1.80296	0.147773	12.2009	3.07567e-34	6.40087e-32
LOC728392	140.486	1.80273	0.212895	8.46768	2.50331e-17	9.96921e-16
FBLIM1	98.0432	1.79795	0.230402	7.80353	6.01971e-15	1.76528e-13
COL19A1	71.2026	1.79755	0.264895	6.78589	1.15375e-11	2.20546e-10
PIK3CD	74.9178	1.79383	0.249832	7.18013	6.96431e-13	1.5765e-11
NMNAT2	178.278	1.79262	0.189761	9.44674	3.49551e-21	2.12748e-19
LLGL2	157.241	1.79052	0.200467	8.93172	4.19455e-19	2.02705e-17
LMNA	1594.67	1.78808	0.150247	11.9009	1.1702e-32	2.15701e-30
PCDH7	83.3274	1.78796	0.246129	7.26432	3.74919e-13	8.73209e-12
PCSK1N	121.77	1.7861	0.234477	7.61736	2.58913e-14	6.9599e-13
LOC100126784	40.0369	1.78571	0.286655	6.22947	4.68008e-10	6.96507e-09
SFXN3	242.992	1.78571	0.17879	9.9877	1.72532e-23	1.41795e-21
LOC729177	126.61	1.78502	0.214984	8.30305	1.01474e-16	3.77324e-15
MFSD6	123.347	1.78464	0.227038	7.86053	3.82513e-15	1.15858e-13
POLD4	108.757	1.78416	0.230783	7.7309	1.06791e-14	3.05167e-13
HOXD10	84.1578	1.77558	0.249792	7.10823	1.17541e-12	2.5881e-11
RHBDL3	125.268	1.77513	0.215969	8.21936	2.04592e-16	7.33291e-15
LGALS3BP	378.396	1.7745	0.180401	9.83643	7.84453e-23	5.62322e-21
PPP1R27	105.111	1.77441	0.229256	7.73986	9.95255e-15	2.85373e-13
RTN4RL1	34.8494	1.77421	0.293164	6.05193	1.43121e-09	1.94183e-08
SPRY4	40.0653	1.77099	0.28431	6.22909	4.69157e-10	6.97412e-09
RUNDC3A	329.627	1.77053	0.179013	9.89052	4.57642e-23	3.43312e-21
SEMA3E	64.9975	1.76689	0.258146	6.84454	7.67231e-12	1.5045e-10
COL5A2	176.963	1.76583	0.193887	9.10754	8.42693e-20	4.40213e-18
LOC643401	465.935	1.7637	0.171389	10.2906	7.76839e-25	7.42486e-23
FBN1	59.3322	1.76179	0.259888	6.77905	1.20965e-11	2.30889e-10
YPEL2	452.81	1.76177	0.166906	10.5555	4.79281e-26	5.24082e-24
C17orf104	108.002	1.75293	0.236705	7.40554	1.30616e-13	3.1859e-12
PPM1H	379.475	1.75272	0.172677	10.1503	3.30349e-24	2.91952e-22
LRP10	157.119	1.75205	0.209643	8.35729	6.41775e-17	2.42839e-15
EPHA3	50.5278	1.75083	0.275628	6.35213	2.12355e-10	3.3293e-09
FAM110B	216.223	1.75014	0.184609	9.48022	2.53743e-21	1.55907e-19
CDH6	409.441	1.74601	0.171471	10.1826	2.3723e-24	2.20215e-22
LOC157627	100.046	1.74284	0.23248	7.49675	6.54221e-14	1.65194e-12
BMF	202.121	1.74244	0.188831	9.2275	2.77016e-20	1.50182e-18
DEM1	62.73	1.73527	0.261129	6.64526	3.0269e-11	5.4854e-10
MAL2	162.584	1.73469	0.207292	8.36834	5.84365e-17	2.23079e-15
IFI44	44.1284	1.73259	0.285088	6.07739	1.22152e-09	1.6875e-08
LONRF3	50.4455	1.73235	0.268598	6.4496	1.12146e-10	1.84334e-09
FABP3	62.8683	1.72917	0.257691	6.71026	1.94282e-11	3.61735e-10
CADPS	287.12	1.72752	0.184483	9.3641	7.67024e-21	4.4986e-19
ARHGAP4	60.9009	1.72412	0.268218	6.42806	1.29239e-10	2.10286e-09
CRABP1	63.7434	1.71886	0.26379	6.51601	7.22012e-11	1.22419e-09
LGALS3	93.8957	1.71844	0.232992	7.37552	1.63701e-13	3.96292e-12
TGFB3	174.672	1.7165	0.201288	8.52758	1.49442e-17	6.08281e-16
F3	232.975	1.71438	0.180198	9.51384	1.83751e-21	1.15094e-19
ZBTB7B	636.007	1.71352	0.16142	10.6153	2.52963e-26	2.83825e-24
GFRA1	2353.8	1.71159	0.124647	13.7315	6.57618e-43	2.49566e-40
RBFOX1	54.6538	1.70992	0.264848	6.45625	1.07331e-10	1.77096e-09
NPR3	48.4061	1.70803	0.279746	6.10567	1.02372e-09	1.4311e-08
FOS	263.764	1.70419	0.234442	7.26917	3.61715e-13	8.4398e-12
NMRAL1	56.8219	1.7035	0.272632	6.24833	4.14876e-10	6.22458e-09
KCNK3	68.4965	1.69998	0.256928	6.61656	3.67657e-11	6.56079e-10
LIMCH1	805.551	1.69924	0.153417	11.076	1.64104e-28	2.20565e-26
KCNC4	114.045	1.68931	0.225131	7.5037	6.20427e-14	1.57586e-12
CLCN4	75.2543	1.68837	0.253599	6.65764	2.78259e-11	5.064e-10
GSTO2	103.017	1.68753	0.231655	7.28467	3.22458e-13	7.59248e-12
COL22A1	50.8967	1.68482	0.275242	6.12124	9.28496e-10	1.3079e-08
RFTN1	220.19	1.68384	0.183504	9.17604	4.47245e-20	2.39452e-18
ZNF506	54.7293	1.68092	0.270193	6.2212	4.93355e-10	7.30018e-09
HAPLN2	34.5717	1.67762	0.289465	5.79557	6.80879e-09	8.32738e-08
FDXR	1704.36	1.67561	0.149396	11.2159	3.40712e-29	4.93956e-27
RET	65.5273	1.67531	0.268824	6.23199	4.60537e-10	6.86972e-09
SPATA20	449.708	1.66773	0.15402	10.828	2.53719e-27	3.00343e-25
CPE	2575.5	1.66725	0.116176	14.3511	1.04812e-46	4.50796e-44
LOC375295	111.128	1.66702	0.227323	7.33327	2.24612e-13	5.35535e-12
NHLH2	336.721	1.66001	0.163478	10.1544	3.16897e-24	2.83953e-22
SHISA2	189.458	1.65446	0.197492	8.37735	5.41311e-17	2.09118e-15
TTC39A	577.41	1.65229	0.151241	10.9249	8.76724e-28	1.08773e-25
LRIG1	230.894	1.65216	0.179275	9.21577	3.09066e-20	1.66162e-18
TNC	460.26	1.65002	0.149498	11.0371	2.53006e-28	3.26453e-26
TRNP1	172.539	1.64599	0.196768	8.36512	6.00535e-17	2.28575e-15
APLP2	4915.19	1.64328	0.109972	14.9427	1.7366e-50	1.24485e-47
PLK2	1047.48	1.63984	0.12818	12.7933	1.78717e-37	4.7061e-35
NOTCH2	78.0562	1.6372	0.251597	6.50724	7.65458e-11	1.29107e-09
GPR56	62.9515	1.6368	0.269475	6.07404	1.24735e-09	1.7195e-08
KIAA1598	229.176	1.63645	0.18941	8.63969	5.63665e-18	2.40827e-16
ZNF10	287.297	1.63505	0.18361	8.90501	5.33812e-19	2.57007e-17
MLH3	71.8607	1.63401	0.254809	6.41267	1.4299e-10	2.29764e-09
PPIC	129.831	1.63254	0.21772	7.49834	6.46317e-14	1.63518e-12
CHL1	74.0648	1.63157	0.246596	6.61637	3.68132e-11	6.56079e-10
MIR100HG	42.6957	1.6312	0.288215	5.65966	1.51673e-08	1.73343e-07
FSIP2	75.5504	1.62981	0.262925	6.19874	5.69152e-10	8.33573e-09
KIAA1456	188.323	1.62781	0.204238	7.97016	1.58466e-15	5.0238e-14
PPL	36.5697	1.62402	0.287523	5.64831	1.62033e-08	1.84529e-07
DYRK1B	197.521	1.62395	0.205179	7.91479	2.47669e-15	7.68192e-14
EDNRA	295.354	1.62268	0.179412	9.04445	1.50418e-19	7.58771e-18
FAM190A	225.252	1.62246	0.179193	9.05427	1.37488e-19	7.0119e-18
ROBO2	82.3164	1.62196	0.244361	6.63755	3.18938e-11	5.76367e-10
TNFAIP2	83.9636	1.62088	0.246596	6.57302	4.93058e-11	8.6322e-10
DACT3	219.169	1.60966	0.185966	8.65567	4.90036e-18	2.10764e-16
HPCA	577.576	1.60894	0.163329	9.85092	6.79186e-23	4.92334e-21
PCDHB11	65.1683	1.60888	0.255929	6.28642	3.24878e-10	4.94328e-09
ADAMTSL1	173.463	1.60817	0.195918	8.20837	2.24202e-16	7.96938e-15
IRAK2	55.3857	1.60786	0.271153	5.92973	3.03434e-09	3.93488e-08
HCG11	100.821	1.60556	0.237516	6.75981	1.38176e-11	2.61803e-10
OLFML2B	31.3018	1.60459	0.293099	5.47455	4.38629e-08	4.68659e-07
ORAI3	62.0185	1.60347	0.256159	6.25966	3.85818e-10	5.79535e-09
IRF9	148.293	1.60338	0.199893	8.02118	1.04735e-15	3.43865e-14
EPHX2	323.644	1.59957	0.178009	8.98591	2.56612e-19	1.26376e-17
PLK3	272.737	1.59801	0.188688	8.46907	2.47357e-17	9.88124e-16
GYLTL1B	82.8467	1.59328	0.24067	6.62019	3.5873e-11	6.43769e-10
ARHGAP27	71.7733	1.59131	0.255381	6.2311	4.63173e-10	6.90107e-09
LEPREL1	86.1551	1.59065	0.238215	6.67738	2.43254e-11	4.45207e-10
MPZ	72.029	1.58731	0.250444	6.33798	2.32801e-10	3.62343e-09
SESN3	1091.96	1.58514	0.150778	10.5131	7.5217e-26	7.90871e-24
PCOLCE	208.843	1.58483	0.200024	7.92322	2.31445e-15	7.21336e-14
CHRNB2	329.642	1.58309	0.170132	9.3051	1.33869e-20	7.54285e-19
ADAMTSL2	55.4068	1.58289	0.274377	5.76902	7.97356e-09	9.61522e-08
CALCOCO1	462.694	1.58188	0.154473	10.2405	1.30525e-24	1.2204e-22
COBLL1	149.489	1.58044	0.206606	7.64954	2.01698e-14	5.52549e-13
NRXN1	83.3934	1.58008	0.240431	6.57187	4.96879e-11	8.68731e-10
STARD4	1099.92	1.57856	0.157255	10.0382	1.03499e-23	8.67171e-22
MXD4	1487.11	1.57856	0.165117	9.56022	1.17506e-21	7.50585e-20
SNCAIP	33.15	1.57796	0.292438	5.39587	6.81905e-08	7.0389e-07
ARHGAP24	86.8493	1.57658	0.235845	6.68483	2.31194e-11	4.24338e-10
TOB1	501.212	1.57612	0.162022	9.72779	2.29528e-22	1.57532e-20
ODZ1	54.7702	1.5734	0.264453	5.94964	2.68732e-09	3.50956e-08
CHRND	65.0394	1.57096	0.252813	6.21391	5.16823e-10	7.59518e-09
KIFC2	168.67	1.56848	0.215659	7.27298	3.51651e-13	8.21985e-12
PIK3IP1	167.482	1.56612	0.198268	7.89902	2.81113e-15	8.6568e-14
LINC00086	83.0174	1.56588	0.244312	6.40934	1.46153e-10	2.33682e-09
SLC27A3	70.8833	1.56558	0.252441	6.20177	5.5831e-10	8.18621e-09
AGAP2	43.2816	1.5639	0.284615	5.49481	3.91142e-08	4.21982e-07
PGM5	110.897	1.56369	0.222741	7.0202	2.21549e-12	4.65578e-11
GATA2	269.37	1.55871	0.219063	7.11536	1.11618e-12	2.47457e-11
SESN1	785.475	1.55635	0.135482	11.4875	1.52443e-30	2.34163e-28
CRHR1	358.015	1.55502	0.161874	9.60641	7.51202e-22	4.87073e-20
SEMA3C	72.1175	1.54983	0.262445	5.90535	3.51893e-09	4.52239e-08
GALNTL6	42.8591	1.54734	0.28026	5.52107	3.36939e-08	3.675e-07
TMBIM1	70.6445	1.54565	0.251544	6.14464	8.01433e-10	1.14198e-08
GRIK2	131.444	1.54548	0.225087	6.86614	6.59623e-12	1.30339e-10
CXXC5	277.424	1.54451	0.177902	8.68183	3.89465e-18	1.70348e-16
ADCY5	55.2936	1.54443	0.276017	5.5954	2.20115e-08	2.459e-07
LGALS1	28.5549	1.54346	0.295572	5.22194	1.77054e-07	1.70233e-06
FAM167A	164.115	1.54162	0.19703	7.82425	5.10677e-15	1.51826e-13
SLC35D2	39.7365	1.5391	0.287993	5.34424	9.07982e-08	9.18158e-07
PLXNA2	232.885	1.53708	0.188373	8.15974	3.35753e-16	1.15835e-14
COL11A2	45.1238	1.5363	0.27811	5.52409	3.31203e-08	3.61856e-07
ERBB4	37.3299	1.5335	0.293299	5.22846	1.70924e-07	1.64831e-06
ADSSL1	78.2604	1.53053	0.242828	6.30295	2.92028e-10	4.46222e-09
KCNJ6	559.425	1.52994	0.1601	9.55615	1.22219e-21	7.76846e-20
PLEKHG1	158.82	1.52983	0.195534	7.82386	5.12281e-15	1.51953e-13
COL9A1	36.1068	1.52841	0.290258	5.26569	1.3966e-07	1.36311e-06
STAG3	58.1129	1.52799	0.26137	5.84609	5.03248e-09	6.3227e-08
EBF4	72.5577	1.51944	0.246095	6.17421	6.64946e-10	9.59709e-09
MYO5A	78.137	1.51912	0.260384	5.83416	5.40626e-09	6.72032e-08
SLC6A17	283.121	1.5152	0.170672	8.87785	6.81672e-19	3.25763e-17
GPR83	51.5604	1.51396	0.270152	5.60411	2.09322e-08	2.34656e-07
FOXC1	241.12	1.51349	0.225441	6.71346	1.90068e-11	3.54913e-10
MIR137HG	84.4768	1.5122	0.240537	6.28675	3.24173e-10	4.93837e-09
IFI27L2	107.749	1.51053	0.234134	6.45158	1.10692e-10	1.82175e-09
MMP11	183.062	1.50936	0.202044	7.47042	7.99408e-14	1.98743e-12
GPR37	74.2078	1.50929	0.245667	6.14367	8.06374e-10	1.14589e-08
FGD5	69.8888	1.50763	0.248655	6.06315	1.33478e-09	1.82831e-08
KCNK6	45.8693	1.5064	0.275743	5.46305	4.68011e-08	4.96607e-07
WDR78	191.641	1.50508	0.201909	7.45427	9.03689e-14	2.24237e-12
AGPAT9	48.5769	1.50409	0.276419	5.44135	5.28793e-08	5.5562e-07
TSHZ2	145.428	1.50329	0.225171	6.67623	2.45161e-11	4.48061e-10
SEMA3B	114.086	1.50231	0.220269	6.82034	9.08282e-12	1.75969e-10
FRAT1	74.8568	1.50017	0.249899	6.00311	1.93576e-09	2.58028e-08
REC8	1224.5	1.49931	0.153196	9.78687	1.28198e-22	8.94128e-21
CCDC149	66.8612	1.49647	0.256971	5.8235	5.76278e-09	7.12234e-08
IGSF1	81.7324	1.49489	0.244233	6.12075	9.31386e-10	1.31054e-08
VWA5B2	60.2268	1.49178	0.264946	5.63052	1.79665e-08	2.0371e-07
POU3F1	87.3701	1.49038	0.251322	5.93017	3.02619e-09	3.92826e-08
SNPH	51.5187	1.48995	0.270928	5.49943	3.81023e-08	4.12445e-07
PPM1J	34.51	1.48886	0.290696	5.12171	3.02782e-07	2.79656e-06
PRICKLE1	475.289	1.48886	0.171557	8.67849	4.01051e-18	1.74823e-16
PALMD	136.846	1.48819	0.210655	7.06459	1.61095e-12	3.44712e-11
LONRF2	57.5834	1.48563	0.264849	5.60933	2.03109e-08	2.28485e-07
FBXO32	58.801	1.48474	0.270482	5.48924	4.03655e-08	4.33669e-07
TUBB2B	799.174	1.47838	0.15806	9.35325	8.49921e-21	4.96223e-19
SPTBN4	111.793	1.47544	0.216671	6.80961	9.78659e-12	1.88427e-10
ANK1	67.918	1.47261	0.256389	5.74363	9.26667e-09	1.10506e-07
PTCHD4	128.76	1.47019	0.208102	7.06476	1.60896e-12	3.44712e-11
PINK1	441.901	1.46701	0.152575	9.61495	6.91413e-22	4.50571e-20
MIAT	693.251	1.46684	0.158499	9.25459	2.15045e-20	1.18578e-18
YPEL5	590.157	1.46497	0.147075	9.96072	2.26414e-23	1.80335e-21
CASZ1	227.639	1.46479	0.211269	6.9333	4.11149e-12	8.28916e-11
PCSK2	43.5176	1.46473	0.27381	5.34946	8.82149e-08	8.92734e-07
SESN2	853.348	1.46422	0.139279	10.5128	7.53911e-26	7.90871e-24
NTRK1	489.224	1.464	0.174785	8.376	5.4755e-17	2.10897e-15
PLCD1	158.621	1.46372	0.197493	7.4115	1.24878e-13	3.0517e-12
HOMEZ	89.4815	1.46347	0.236421	6.19009	6.01289e-10	8.76659e-09
MAFB	196.54	1.46208	0.196633	7.43557	1.04118e-13	2.57363e-12
PGPEP1	473.696	1.45959	0.153137	9.53122	1.55447e-21	9.78406e-20
FBXL13	64.6285	1.45874	0.257962	5.65488	1.5596e-08	1.77926e-07
SERPINF1	605.375	1.45565	0.169577	8.58404	9.16003e-18	3.81264e-16
FAT4	299	1.4551	0.178034	8.17316	3.00412e-16	1.0448e-14
CELF3	345.623	1.45475	0.164865	8.82393	1.10513e-18	5.11093e-17
PFKFB2	141.232	1.45366	0.209741	6.93075	4.18626e-12	8.42672e-11
WIPI1	497.093	1.45319	0.148793	9.76654	1.56712e-22	1.08713e-20
BACH2	37.9722	1.45266	0.290468	5.0011	5.70033e-07	4.95629e-06
GCH1	318.707	1.45176	0.165015	8.79774	1.39603e-18	6.36501e-17
LRP1B	75.6181	1.45064	0.245692	5.90431	3.54127e-09	4.54205e-08
GRIN2C	42.7076	1.44978	0.281291	5.15402	2.54959e-07	2.38042e-06
SLC22A17	87.0717	1.44814	0.240537	6.02045	1.73937e-09	2.33782e-08
CUX2	244.379	1.44747	0.184334	7.85243	4.08039e-15	1.22726e-13
TM7SF2	180.694	1.44697	0.214447	6.74745	1.50467e-11	2.83842e-10
PRSS35	62.3186	1.44683	0.260482	5.55443	2.78518e-08	3.07945e-07
RHCE	67.559	1.4463	0.258899	5.58635	2.31894e-08	2.58387e-07
SCUBE1	79.1946	1.44545	0.246974	5.85264	4.83818e-09	6.09639e-08
PDZRN3	1279.14	1.44286	0.137768	10.4731	1.14831e-25	1.18533e-23
CELF6	56.5983	1.44031	0.259742	5.54517	2.93675e-08	3.23043e-07
PARVA	529.284	1.43907	0.160804	8.94926	3.57871e-19	1.74909e-17
ABCC8	296.579	1.43798	0.165493	8.68908	3.65378e-18	1.60356e-16
KANK4	166.635	1.43724	0.193644	7.42207	1.15303e-13	2.82843e-12
TCIRG1	51.3955	1.43468	0.272098	5.27266	1.34463e-07	1.31438e-06
HOXD11	121.166	1.43374	0.221292	6.47893	9.23763e-11	1.53985e-09
PTGER1	37.1747	1.43371	0.294729	4.86452	1.14737e-06	9.27598e-06
NGFR	132.966	1.43103	0.306747	4.66518	3.08354e-06	2.24151e-05
ATOH7	47.0174	1.43024	0.271246	5.27284	1.34327e-07	1.31404e-06
STEAP3	252.641	1.42894	0.185679	7.69576	1.40652e-14	3.92821e-13
CCDC74B	68.8582	1.42817	0.256522	5.56743	2.5852e-08	2.86817e-07
PLEKHG5	72.5456	1.42716	0.246641	5.78639	7.19145e-09	8.76216e-08
PTPRU	1103.52	1.42471	0.140811	10.1179	4.60274e-24	3.98585e-22
ARHGAP31	61.2142	1.42166	0.266648	5.33159	9.73542e-08	9.78318e-07
C15orf27	47.3447	1.42013	0.27749	5.11778	3.09149e-07	2.84925e-06
RNF182	203.993	1.41851	0.19746	7.18378	6.78096e-13	1.5404e-11
PNRC1	1392.04	1.41671	0.124137	11.4125	3.62309e-30	5.49986e-28
C5orf4	72.1551	1.41391	0.252363	5.60267	2.11071e-08	2.36205e-07
RIMS1	101.975	1.41313	0.233634	6.04848	1.4622e-09	1.97558e-08
MMP2	559.818	1.40994	0.172304	8.18284	2.77226e-16	9.6939e-15
SYTL2	66.7394	1.40964	0.253638	5.55768	2.73376e-08	3.02779e-07
D4S234E	483.821	1.40448	0.15189	9.24665	2.31649e-20	1.26651e-18
CHRM4	42.4878	1.40374	0.282639	4.96653	6.81601e-07	5.80125e-06
KY	87.5207	1.39982	0.245822	5.69443	1.23786e-08	1.45333e-07
FRAS1	503.666	1.39804	0.169329	8.25632	1.50233e-16	5.4914e-15
ZDHHC23	225.649	1.39718	0.186987	7.47204	7.8959e-14	1.97062e-12
LOC282997	76.6489	1.39459	0.244332	5.70778	1.14457e-08	1.35079e-07
HERC6	74.0764	1.39364	0.247317	5.63503	1.75029e-08	1.98627e-07
CORIN	37.3106	1.39357	0.284467	4.89888	9.63864e-07	7.94173e-06
C20orf160	69.9234	1.39346	0.2489	5.59848	2.16243e-08	2.41784e-07
ALDH1A3	152.954	1.39337	0.207851	6.70368	2.03231e-11	3.77065e-10
AGRN	356.224	1.39273	0.178485	7.80306	6.04256e-15	1.76796e-13
LEPR	660.242	1.39202	0.177098	7.86017	3.83618e-15	1.15921e-13
ITGB5	148.185	1.39194	0.2012	6.91819	4.57465e-12	9.1799e-11
B4GALNT3	116.711	1.39088	0.223101	6.23432	4.53731e-10	6.77604e-09
KCNMB4	166.426	1.38989	0.195591	7.10609	1.1938e-12	2.61522e-11
DRAM1	143.593	1.3893	0.229672	6.04908	1.45676e-09	1.97029e-08
MERTK	114.566	1.38716	0.217331	6.38274	1.73946e-10	2.75076e-09
TUBA1C	346.942	1.38582	0.170464	8.12967	4.30461e-16	1.46938e-14
LOC388849	78.4788	1.38537	0.243375	5.69234	1.25313e-08	1.46726e-07
KAT2B	311.394	1.38436	0.176149	7.85905	3.87065e-15	1.16689e-13
ARHGAP29	287.663	1.38374	0.185709	7.4511	9.25682e-14	2.29253e-12
DLK1	111.507	1.38346	0.246464	5.61326	1.98555e-08	2.23752e-07
ALS2CL	51.96	1.38171	0.272143	5.07715	3.83131e-07	3.4605e-06
ANKRD6	124.22	1.38095	0.213059	6.48152	9.08037e-11	1.51571e-09
NEFL	2014.75	1.38049	0.115479	11.9545	6.15351e-33	1.16763e-30
VGLL3	207.755	1.37948	0.214618	6.42761	1.29624e-10	2.10647e-09
RIMBP2	244.337	1.37909	0.18269	7.54882	4.39204e-14	1.13341e-12
AKNAD1	665.267	1.37882	0.146261	9.4271	4.21564e-21	2.55373e-19
ZSCAN18	200.419	1.37838	0.197577	6.97645	3.02742e-12	6.24007e-11
SLC4A11	38.736	1.37775	0.282826	4.87136	1.10835e-06	9.00568e-06
EXTL1	62.6752	1.37774	0.254207	5.41978	5.96711e-08	6.22422e-07
NRP1	937.099	1.37253	0.149615	9.17378	4.56725e-20	2.43518e-18
SOX9	86.2734	1.37128	0.23544	5.82434	5.73386e-09	7.09338e-08
ADAMTS6	46.7386	1.36979	0.271806	5.03957	4.66584e-07	4.14053e-06
TSHR	48.0107	1.36848	0.268647	5.094	3.50591e-07	3.19018e-06
CDS1	78.0317	1.36732	0.248865	5.49423	3.92421e-08	4.23008e-07
PTPRE	38.7686	1.36556	0.279552	4.88482	1.03525e-06	8.45965e-06
LACC1	58.3644	1.36128	0.267533	5.08826	3.61363e-07	3.27435e-06
PPP1R16B	97.8382	1.36082	0.224776	6.05409	1.41216e-09	1.92206e-08
TAGLN2	252.245	1.36073	0.170871	7.96349	1.67249e-15	5.27632e-14
INSM1	529.917	1.35786	0.206819	6.56544	5.18799e-11	9.03383e-10
REPS2	55.201	1.35657	0.265668	5.10626	3.286e-07	3.00278e-06
TMEM200A	99.546	1.35456	0.231933	5.84032	5.21009e-09	6.52678e-08
TGFBR2	181.325	1.35428	0.195174	6.93885	3.95318e-12	7.99497e-11
ABCA6	81.9389	1.35147	0.247872	5.45229	4.97243e-08	5.25465e-07
EFEMP2	51.8998	1.35081	0.267434	5.05099	4.39522e-07	3.92196e-06
TP53I3	1506.41	1.35036	0.132908	10.1602	2.98606e-24	2.69435e-22
GGT1	47.5642	1.34967	0.28307	4.76796	1.861e-06	1.43702e-05
ACOT11	148.773	1.34854	0.204955	6.57967	4.7149e-11	8.28834e-10
NLRC5	52.8109	1.34566	0.268495	5.01185	5.3908e-07	4.71257e-06
ELL2	222.199	1.34469	0.192477	6.98624	2.82351e-12	5.84779e-11
ROR2	142.536	1.34342	0.206613	6.5021	7.92085e-11	1.3325e-09
AHRR	69.4278	1.33889	0.249692	5.36217	8.22282e-08	8.34112e-07
TRIM62	92.837	1.33807	0.235062	5.69242	1.25253e-08	1.46726e-07
BMP4	49.173	1.33352	0.273579	4.87434	1.09174e-06	8.88753e-06
MAP1LC3A	172.693	1.33339	0.206499	6.45712	1.06715e-10	1.76305e-09
GKAP1	617.29	1.33265	0.136752	9.74496	1.93849e-22	1.33756e-20
C10orf10	73.9926	1.33228	0.243862	5.46325	4.67499e-08	4.96472e-07
PGAM2	115.251	1.33104	0.215128	6.18721	6.12371e-10	8.898e-09
PYGL	883.2	1.33058	0.130926	10.1628	2.9046e-24	2.6393e-22
KCNH3	241.498	1.33043	0.198609	6.69876	2.102e-11	3.88013e-10
PRUNE2	299.568	1.33037	0.197114	6.74922	1.48638e-11	2.80801e-10
DNAH7	54.9688	1.32987	0.261456	5.08638	3.64965e-07	3.30234e-06
GIPR	109.666	1.32976	0.226152	5.87996	4.10371e-09	5.21677e-08
JAG2	63.0414	1.32849	0.264045	5.03133	4.87101e-07	4.30484e-06
C2orf55	41.8571	1.32827	0.295057	4.50173	6.7403e-06	4.54389e-05
KCTD12	792.864	1.3278	0.171883	7.72501	1.11849e-14	3.17881e-13
RNF112	124.66	1.32684	0.212727	6.2373	4.45177e-10	6.65599e-09
ELOVL7	120.453	1.32652	0.22298	5.94904	2.69723e-09	3.51894e-08
GPC4	47.442	1.32569	0.27063	4.89853	9.65568e-07	7.95069e-06
C17orf103	31.1289	1.32535	0.295822	4.48021	7.45681e-06	4.98009e-05
HIC1	36.1497	1.32496	0.291862	4.53966	5.63444e-06	3.86092e-05
LOC100131564	427.598	1.32442	0.156944	8.43882	3.2056e-17	1.26489e-15
SULF1	39.4712	1.32389	0.283302	4.67308	2.96723e-06	2.16306e-05
ID3	1950.23	1.32327	0.150947	8.7665	1.84312e-18	8.28636e-17
CNKSR3	113.88	1.32271	0.230365	5.74182	9.36624e-09	1.11591e-07
RAPGEF4	91.7506	1.31912	0.2397	5.50321	3.72935e-08	4.04368e-07
CHPF	356.501	1.31878	0.188426	6.99891	2.57966e-12	5.37727e-11
NPY1R	103.428	1.3181	0.232551	5.668	1.44472e-08	1.6612e-07
ADAMTSL3	35.0335	1.31557	0.28675	4.58785	4.47835e-06	3.12854e-05
ARSJ	98.5279	1.31517	0.226691	5.80158	6.56923e-09	8.0573e-08
PROKR1	71.7583	1.31383	0.247884	5.30017	1.15695e-07	1.14921e-06
PLAGL1	91.7509	1.30967	0.241387	5.42562	5.77546e-08	6.04876e-07
NELL1	610.415	1.30725	0.141813	9.21815	3.02266e-20	1.63186e-18
SEMA4F	528.064	1.30443	0.141178	9.23959	2.47448e-20	1.34718e-18
TBC1D2	71.644	1.30345	0.249286	5.22875	1.70657e-07	1.64696e-06
FRMD6	698.476	1.30335	0.145715	8.94447	3.73725e-19	1.81285e-17
AQP3	103.372	1.30208	0.232387	5.60306	2.106e-08	2.35883e-07
FZD7	205.907	1.30173	0.185093	7.03285	2.02358e-12	4.26638e-11
KIAA1199	62.688	1.30164	0.25352	5.13428	2.83228e-07	2.62724e-06
ABCG2	33.27	1.29858	0.292429	4.44066	8.9685e-06	5.86521e-05
MECOM	96.3611	1.29857	0.227512	5.70768	1.14529e-08	1.35079e-07
CCDC24	80.0336	1.29782	0.248888	5.21448	1.84336e-07	1.76577e-06
SRCIN1	88.5424	1.29644	0.244473	5.30301	1.13906e-07	1.13318e-06
PAIP2B	191.718	1.29575	0.187861	6.89738	5.2969e-12	1.05635e-10
PTCH2	45.4456	1.29558	0.282655	4.5836	4.5703e-06	3.1876e-05
FAS	127.766	1.29541	0.212694	6.09049	1.12566e-09	1.56682e-08
MDGA2	47.9173	1.29491	0.272737	4.74782	2.05621e-06	1.57082e-05
FRMD3	73.9545	1.29451	0.25262	5.12435	2.98566e-07	2.76356e-06
DNAJC6	740.866	1.29425	0.139948	9.24812	2.28466e-20	1.25442e-18
NEB	130.702	1.29194	0.224468	5.75556	8.63533e-09	1.03334e-07
GCNT1	46.7089	1.29185	0.271852	4.75204	2.01377e-06	1.54297e-05
NDRG2	184.036	1.28922	0.187022	6.89343	5.44617e-12	1.08444e-10
CCDC80	33.5669	1.2888	0.292213	4.41049	1.03139e-05	6.66066e-05
C17orf82	54.1816	1.2875	0.26111	4.93086	8.1868e-07	6.81072e-06
SYT17	96.3957	1.28748	0.230671	5.58148	2.38487e-08	2.65275e-07
LRRN2	193.989	1.28381	0.188428	6.81326	9.54131e-12	1.84299e-10
AFAP1L2	36.9744	1.28348	0.28157	4.55831	5.15657e-06	3.55613e-05
RUNDC3B	79.1333	1.28193	0.245607	5.21942	1.7948e-07	1.72309e-06
SMOX	101.433	1.27899	0.225296	5.67692	1.37144e-08	1.58564e-07
ARNTL	197.029	1.27877	0.199318	6.41576	1.40122e-10	2.25717e-09
CCDC64	113.498	1.27549	0.218488	5.83781	5.28924e-09	6.60668e-08
LOC730091	31.0555	1.27545	0.295608	4.31465	1.59854e-05	9.93546e-05
SLC8A2	25.5776	1.27468	0.30226	4.21717	2.47389e-05	0.000147099
GPR155	242.673	1.27387	0.185648	6.86174	6.80267e-12	1.34212e-10
RELB	53.2111	1.27143	0.264372	4.80923	1.5151e-06	1.18913e-05
CPS1	153.218	1.27102	0.197968	6.42031	1.35997e-10	2.19896e-09
LAMB2	237.089	1.26936	0.176944	7.17381	7.29397e-13	1.64823e-11
LPAR1	660.988	1.26767	0.135281	9.37064	7.20957e-21	4.24772e-19
KIAA1024	104.715	1.26521	0.222688	5.68155	1.33482e-08	1.54468e-07
TPBG	173.091	1.258	0.194768	6.45896	1.05427e-10	1.74401e-09
NEAT1	959.606	1.25756	0.162078	7.75896	8.56255e-15	2.48276e-13
CYP27B1	35.4064	1.25564	0.285087	4.40443	1.06065e-05	6.84276e-05
IL13RA1	346.994	1.25356	0.175122	7.15824	8.17218e-13	1.84024e-11
EGLN3	293.416	1.25298	0.165071	7.59054	3.18581e-14	8.42346e-13
ATP8B1	51.2393	1.2524	0.264394	4.73686	2.17052e-06	1.64452e-05
GAP43	39.2695	1.2491	0.285139	4.38065	1.18325e-05	7.56193e-05
PLEKHH3	870.059	1.24559	0.176813	7.04467	1.85904e-12	3.92589e-11
MAPT	153.344	1.24474	0.206689	6.02227	1.71982e-09	2.31396e-08
MIR22HG	133.38	1.24375	0.213021	5.83861	5.26395e-09	6.58786e-08
TEX14	45.5925	1.24326	0.273023	4.5537	5.27115e-06	3.62546e-05
PPP1R13B	132.501	1.24162	0.203412	6.10398	1.03457e-09	1.44314e-08
ATP8A2	66.6016	1.24073	0.251861	4.92623	8.38314e-07	6.96059e-06
TOM1L1	436.775	1.23892	0.15516	7.98478	1.40768e-15	4.50702e-14
DNM3	101.301	1.2389	0.224603	5.51593	3.46938e-08	3.77449e-07
KIAA0040	53.0172	1.23781	0.267669	4.62442	3.75657e-06	2.67944e-05
RIN1	40.5052	1.23522	0.281654	4.38558	1.15676e-05	7.41099e-05
JAK3	90.8527	1.23467	0.228047	5.41412	6.15894e-08	6.40878e-07
ELAVL3	79.7698	1.23325	0.239789	5.14304	2.70334e-07	2.51668e-06
ACP6	255.666	1.23303	0.174422	7.06927	1.55752e-12	3.34945e-11
PBXIP1	2335.45	1.23152	0.136961	8.99177	2.43274e-19	1.20267e-17
RIBC1	27.6512	1.23026	0.298428	4.12246	3.74841e-05	0.000214482
ARHGAP26	183.116	1.23015	0.196343	6.26532	3.72058e-10	5.61481e-09
NOS1AP	40.3124	1.22954	0.287444	4.27751	1.88995e-05	0.00011492
KITLG	449.185	1.22941	0.182916	6.72115	1.80291e-11	3.38124e-10
ABCC6	63.7329	1.22866	0.253628	4.84435	1.27028e-06	1.01363e-05
KIAA1467	75.7708	1.22856	0.247981	4.95426	7.26054e-07	6.12706e-06
SOCS2	329.51	1.22843	0.163955	7.49252	6.75624e-14	1.70265e-12
MCF2L2	33.0231	1.22831	0.291319	4.21636	2.48274e-05	0.00014749
PCDH8	140.02	1.22748	0.219426	5.59404	2.21843e-08	2.47616e-07
KIAA0226L	36.712	1.22693	0.28706	4.27412	1.91896e-05	0.000116629
EML6	278.955	1.22656	0.175925	6.97206	3.12322e-12	6.42727e-11
EVI5L	194.828	1.22649	0.194593	6.30285	2.92225e-10	4.46222e-09
DNALI1	39.1564	1.22554	0.279974	4.37732	1.20149e-05	7.67087e-05
LRP1	394.212	1.22426	0.171663	7.13174	9.91114e-13	2.21252e-11
GPNMB	59.551	1.21995	0.254176	4.79963	1.58955e-06	1.24303e-05
RYR2	675.413	1.21937	0.149244	8.17035	3.07496e-16	1.06656e-14
IGSF8	338.145	1.21905	0.174941	6.96835	3.20675e-12	6.58865e-11
C9orf95	47.1343	1.21869	0.269486	4.5223	6.11722e-06	4.1652e-05
PREX1	874.487	1.21865	0.13366	9.11754	7.68481e-20	4.03078e-18
MRC2	586.369	1.21754	0.157492	7.73077	1.06902e-14	3.05167e-13
HIP1R	520.678	1.21638	0.160739	7.56742	3.807e-14	9.90356e-13
REEP6	140.224	1.21635	0.211178	5.75981	8.42072e-09	1.01072e-07
CCNG2	468.171	1.21613	0.171105	7.10748	1.1818e-12	2.59334e-11
COTL1	32.0903	1.21539	0.291301	4.17229	3.0155e-05	0.000176458
DEPDC7	351.132	1.2152	0.174679	6.95675	3.48219e-12	7.08685e-11
PCDH11X	55.4848	1.21502	0.26768	4.53909	5.64987e-06	3.86944e-05
PPFIA4	244.523	1.21447	0.186453	6.51358	7.33827e-11	1.24259e-09
ABCD1	88.4245	1.21216	0.229312	5.28606	1.24979e-07	1.23006e-06
DDR1	539.382	1.21126	0.153423	7.89494	2.90448e-15	8.92299e-14
PTPN5	39.4017	1.2094	0.281748	4.29249	1.76678e-05	0.000108505
MBOAT1	100.43	1.20917	0.224631	5.3829	7.32958e-08	7.49988e-07
CD44	46.7934	1.20891	0.270613	4.46729	7.9218e-06	5.24987e-05
IL12RB2	34.4316	1.20831	0.289739	4.17035	3.04133e-05	0.000177728
ATP2B4	559.286	1.20768	0.15176	7.95781	1.75106e-15	5.5107e-14
MICAL1	748.056	1.20764	0.161005	7.50061	6.352e-14	1.61021e-12
DTX3L	94.1515	1.20704	0.237742	5.0771	3.83248e-07	3.4605e-06
USP53	175.435	1.20542	0.195503	6.16575	7.0149e-10	1.00682e-08
FAM19A2	160.31	1.20064	0.196049	6.12417	9.11556e-10	1.28685e-08
TENC1	42.4464	1.19768	0.282224	4.24374	2.19827e-05	0.000132111
ERN1	178.943	1.19746	0.192605	6.21717	5.06209e-10	7.46471e-09
SMOC1	37.9159	1.19665	0.281256	4.25464	2.09381e-05	0.000126363
TMEM87B	162.121	1.19657	0.203142	5.89032	3.85459e-09	4.90491e-08
SLC12A4	164.533	1.19432	0.20251	5.89759	3.68852e-09	4.71218e-08
CACNA2D2	67.6948	1.19422	0.256079	4.66347	3.10916e-06	2.25887e-05
BAALC	112.505	1.1929	0.22111	5.39506	6.85023e-08	7.06543e-07
PHLDA3	729.09	1.19201	0.163095	7.30865	2.69841e-13	6.41207e-12
TLE2	49.0846	1.19153	0.273833	4.3513	1.35332e-05	8.53051e-05
CREG1	1067.21	1.19003	0.127318	9.34688	9.02707e-21	5.24668e-19
OLFM2	35.5428	1.19002	0.28688	4.14813	3.35203e-05	0.000193924
UBTD1	123.184	1.18888	0.219673	5.41206	6.2304e-08	6.46749e-07
MARCH9	100.605	1.18859	0.225006	5.28248	1.27443e-07	1.2524e-06
MGAT4A	94.5973	1.18802	0.232339	5.11331	3.1656e-07	2.91131e-06
SYBU	524.074	1.18448	0.147462	8.03245	9.55478e-16	3.14503e-14
DENND2C	60.5385	1.18313	0.255195	4.63617	3.54921e-06	2.54702e-05
RIN2	52.1605	1.18307	0.269282	4.39344	1.11573e-05	7.17661e-05
DSE	1224.97	1.18293	0.146632	8.06734	7.18452e-16	2.3954e-14
PLIN5	54.6638	1.18222	0.26029	4.54194	5.57396e-06	3.82354e-05
LOC100499489	57.6645	1.18181	0.269766	4.38087	1.18206e-05	7.55801e-05
SOX13	81.9386	1.18171	0.236049	5.00621	5.5511e-07	4.84285e-06
MAST4	101.48	1.18168	0.230096	5.13561	2.81232e-07	2.6106e-06
NRCAM	411.331	1.1816	0.1637	7.21811	5.27149e-13	1.21029e-11
PDCD4	950.999	1.18077	0.147499	8.00523	1.19245e-15	3.86006e-14
C11orf96	401.258	1.17939	0.168767	6.9883	2.78246e-12	5.78133e-11
MAGED2	1873.64	1.17927	0.13692	8.61281	7.12933e-18	3.00329e-16
FKBP1B	76.1742	1.17879	0.242898	4.85304	1.21581e-06	9.75599e-06
MAPK10	552.144	1.17857	0.152098	7.74875	9.28018e-15	2.6848e-13
NPR1	119.77	1.17789	0.221468	5.31855	1.04597e-07	1.04541e-06
COL27A1	228.998	1.17783	0.183364	6.42346	1.33213e-10	2.15936e-09
LRRK2	65.7879	1.17684	0.265641	4.4302	9.41466e-06	6.12903e-05
DPY19L2P1	81.6544	1.17674	0.237136	4.96228	6.96702e-07	5.90641e-06
EPS8	499.689	1.17508	0.149357	7.8676	3.61507e-15	1.09932e-13
MBNL2	206.865	1.17492	0.1952	6.01907	1.75427e-09	2.35539e-08
ARHGEF3	182.564	1.17473	0.186999	6.28201	3.3422e-10	5.0675e-09
RIIAD1	28.3217	1.17273	0.295899	3.96327	7.39294e-05	0.000393365
LOC100190938	142.928	1.17258	0.20611	5.68909	1.27717e-08	1.48999e-07
KIAA1462	60.1161	1.17212	0.253148	4.63017	3.65359e-06	2.61365e-05
LGALS8	134.316	1.17162	0.223748	5.23633	1.63797e-07	1.58669e-06
OSR2	69.9373	1.17154	0.247961	4.7247	2.30454e-06	1.73486e-05
SYNGR3	34.457	1.17041	0.292295	4.0042	6.22278e-05	0.00033779
C1orf95	122.509	1.1689	0.217831	5.3661	8.04559e-08	8.16776e-07
STOX2	179.411	1.16583	0.185901	6.27121	3.58262e-10	5.4193e-09
TSGA10	60.2568	1.16577	0.257084	4.53457	5.77199e-06	3.94262e-05
NEU1	881.775	1.16552	0.135328	8.61254	7.1457e-18	3.00329e-16
TTC39B	86.9933	1.16474	0.233917	4.97932	6.38087e-07	5.46696e-06
HS3ST3B1	100.908	1.16428	0.231132	5.03731	4.72113e-07	4.18384e-06
SEPT4	41.6075	1.1632	0.285073	4.08034	4.49692e-05	0.000251705
CDHR1	90.1407	1.16262	0.231225	5.02807	4.95446e-07	4.36663e-06
PDZD2	75.3501	1.16153	0.244091	4.75859	1.94946e-06	1.49814e-05
HEATR7A	90.4299	1.15936	0.234114	4.95209	7.34209e-07	6.17972e-06
SLC44A5	407.173	1.15843	0.165854	6.98465	2.85568e-12	5.90494e-11
SCARNA9	122.855	1.15658	0.221303	5.2262	1.73029e-07	1.66736e-06
CDK5R2	64.2967	1.15634	0.280603	4.12092	3.77361e-05	0.000215733
CPLX1	78.2141	1.15617	0.245732	4.70502	2.53836e-06	1.88557e-05
ZNF880	88.0295	1.15577	0.239375	4.82829	1.37709e-06	1.08876e-05
ATCAY	87.0518	1.15461	0.230056	5.01884	5.19838e-07	4.56601e-06
CACNB4	50.3517	1.15452	0.277223	4.16459	3.11918e-05	0.000181865
PEX5L	164.058	1.15198	0.197719	5.82634	5.66564e-09	7.01593e-08
LYST	173.907	1.15077	0.206517	5.57228	2.51425e-08	2.79185e-07
PCDH17	131.256	1.14891	0.213757	5.37486	7.66423e-08	7.8299e-07
SYT13	72.5655	1.14826	0.24357	4.71429	2.42552e-06	1.80904e-05
IER3	98.3258	1.14764	0.233262	4.91997	8.65558e-07	7.15916e-06
FAM84A	32493.3	1.14718	0.113001	10.152	3.24641e-24	2.88886e-22
B3GNT9	80.5078	1.14653	0.237175	4.83411	1.33744e-06	1.05936e-05
DFNB31	56.331	1.14572	0.264852	4.32586	1.51935e-05	9.47979e-05
PARD3B	81.0628	1.14547	0.23573	4.85924	1.17838e-06	9.49695e-06
ZBTB38	162.942	1.14484	0.217606	5.26109	1.43201e-07	1.39451e-06
TMEM38A	70.4981	1.14465	0.248004	4.61545	3.9225e-06	2.77935e-05
CNTN3	64.9127	1.14359	0.261517	4.37293	1.2259e-05	7.80358e-05
ITM2C	1018.67	1.14238	0.152208	7.50541	6.12386e-14	1.5585e-12
CALY	46.9013	1.14112	0.280356	4.07026	4.696e-05	0.000261513
LRRC43	44.388	1.14003	0.272076	4.1901	2.78826e-05	0.000164278
VILL	127.082	1.13606	0.209477	5.42332	5.85033e-08	6.11725e-07
RTN1	1008.3	1.13507	0.132984	8.53533	1.39752e-17	5.70638e-16
RRM2B	1309.31	1.13455	0.147345	7.69999	1.36075e-14	3.81692e-13
PLXNA3	162.679	1.13301	0.198853	5.69774	1.21404e-08	1.42666e-07
ANK3	195.548	1.13216	0.18688	6.05821	1.37642e-09	1.87936e-08
KIAA1239	676.323	1.13137	0.147871	7.65107	1.99321e-14	5.47201e-13
HDAC11	156.099	1.13135	0.200165	5.6521	1.58497e-08	1.80662e-07
SRG7	76.6908	1.12997	0.242026	4.66881	3.02953e-06	2.20598e-05
PTPN3	368.643	1.12963	0.154936	7.29092	3.0785e-13	7.26176e-12
GRN	2057.23	1.1294	0.161002	7.01484	2.3022e-12	4.82229e-11
OLFML3	243.633	1.1284	0.175579	6.42675	1.30363e-10	2.11582e-09
C1orf63	843.397	1.12807	0.128088	8.80703	1.28511e-18	5.88005e-17
RAB40B	477.649	1.12799	0.154527	7.29958	2.88664e-13	6.83418e-12
RAB3B	612.13	1.12716	0.165341	6.81717	9.28503e-12	1.79617e-10
GPR26	63.2102	1.12658	0.247106	4.55908	5.13787e-06	3.54703e-05
COMTD1	134.353	1.12385	0.238736	4.70751	2.50756e-06	1.86484e-05
ZMAT3	433.894	1.12329	0.173828	6.46207	1.03278e-10	1.71065e-09
FLVCR2	70.5498	1.12301	0.25061	4.4811	7.42599e-06	4.96464e-05
DUSP5	151.123	1.12208	0.202939	5.52918	3.21733e-08	3.52105e-07
UBE2H	1027.64	1.11906	0.137602	8.1326	4.20187e-16	1.44194e-14
NPC2	188.456	1.11885	0.187196	5.97686	2.27485e-09	3.00985e-08
MAPK4	301.378	1.11499	0.163107	6.83596	8.14584e-12	1.59493e-10
ANKS1B	88.7314	1.11339	0.225946	4.92769	8.32058e-07	6.91755e-06
FBXL21	160.759	1.1126	0.200415	5.5515	2.83224e-08	3.1288e-07
FBXO4	106.286	1.11244	0.234938	4.73506	2.18991e-06	1.65824e-05
ELMO1	98.5483	1.11181	0.230991	4.8132	1.48533e-06	1.16789e-05
ACE	62.4162	1.11107	0.276606	4.0168	5.89946e-05	0.000321997
C5orf41	151.319	1.10999	0.221819	5.00404	5.614e-07	4.89443e-06
ARSA	137.066	1.10977	0.213285	5.20321	1.95871e-07	1.86794e-06
MFI2	245.656	1.10866	0.181983	6.0921	1.11438e-09	1.55279e-08
P4HTM	94.5232	1.10736	0.228741	4.84109	1.29127e-06	1.02911e-05
SHROOM3	808.167	1.10682	0.139677	7.92412	2.29777e-15	7.17872e-14
C1orf226	52.856	1.10654	0.268834	4.11609	3.8536e-05	0.000219528
NTRK3	53.4418	1.10453	0.267769	4.12494	3.70833e-05	0.000212377
NDRG4	1055.92	1.10305	0.124805	8.83817	9.73005e-19	4.53238e-17
TIGD7	228.398	1.10283	0.181641	6.07144	1.26769e-09	1.74568e-08
SYNPO	42.442	1.10241	0.281172	3.92079	8.82599e-05	0.0004605
ISLR2	58.4624	1.10234	0.282455	3.90269	9.51305e-05	0.000491184
PLEKHG4	1435.59	1.10214	0.144119	7.64742	2.05053e-14	5.60552e-13
GLCCI1	604.355	1.10071	0.15534	7.0858	1.38246e-12	3.01315e-11
RIC3	35.624	1.09994	0.287058	3.83178	0.00012722	0.000636004
ASL	475.473	1.09983	0.17417	6.3147	2.70682e-10	4.18277e-09
PAK3	173.31	1.09983	0.190107	5.78531	7.23806e-09	8.79404e-08
GNG2	579.929	1.0993	0.17799	6.17618	6.56721e-10	9.5103e-09
SHISA4	42.4717	1.09916	0.280402	3.91994	8.85709e-05	0.000461936
EGFLAM	482.833	1.09912	0.14486	7.58747	3.26208e-14	8.58993e-13
MGC16121	84.6541	1.0991	0.232802	4.72118	2.34482e-06	1.76005e-05
SNCG	41.2269	1.09885	0.285252	3.85222	0.000117053	0.000590204
TOM1L2	193.482	1.09825	0.181103	6.0642	1.32611e-09	1.8203e-08
GRIP2	128.493	1.09813	0.207429	5.29401	1.19662e-07	1.18527e-06
PTGFR	958.571	1.09754	0.158449	6.92677	4.30554e-12	8.65333e-11
C7orf41	1164.49	1.09722	0.136361	8.04642	8.52496e-16	2.81324e-14
CADM1	1083.12	1.09682	0.130325	8.41601	3.89513e-17	1.523e-15
ZNF396	41.8996	1.09644	0.279173	3.92747	8.58425e-05	0.000449889
IFITM2	31.0197	1.09596	0.291716	3.75695	0.000171996	0.000826542
SH3BP5	441.698	1.09587	0.156166	7.01737	2.2608e-12	4.74328e-11
KIAA1671	106.108	1.09535	0.230082	4.76067	1.92953e-06	1.48371e-05
CASP8	37.6177	1.0953	0.296656	3.69214	0.000222372	0.00103584
KIAA0913	536.232	1.09493	0.155855	7.02529	2.13623e-12	4.49654e-11
SYPL2	31.7568	1.09458	0.290847	3.76343	0.000167601	0.000810551
RGS3	251.413	1.09449	0.178444	6.13354	8.59454e-10	1.21729e-08
GADD45A	1046.08	1.09447	0.133411	8.20379	2.32924e-16	8.25664e-15
CCDC73	66.4982	1.09415	0.252734	4.32924	1.49622e-05	9.349e-05
PFN4	40.2557	1.09323	0.280707	3.89456	9.83779e-05	0.00050633
LOC100131434	54.4417	1.09306	0.266541	4.1009	4.11538e-05	0.00023249
ACVR1	71.8494	1.09298	0.24618	4.43978	9.00506e-06	5.88614e-05
PLEKHM1P	279.355	1.09263	0.166395	6.56647	5.15224e-11	8.9837e-10
SSTR5	88.6785	1.09012	0.242276	4.49949	6.81155e-06	4.58617e-05
SEMA6C	267.898	1.08985	0.191529	5.69026	1.26847e-08	1.48253e-07
ARSG	101.998	1.0884	0.227079	4.79305	1.64268e-06	1.28147e-05
DCHS1	402.466	1.08791	0.172503	6.30658	2.85272e-10	4.38721e-09
TMEM151B	130.204	1.08529	0.206475	5.25629	1.46991e-07	1.42836e-06
HMX3	67.2197	1.08501	0.252047	4.3048	1.6714e-05	0.000103286
FRMD5	97.7011	1.08484	0.232897	4.65803	3.19253e-06	2.31423e-05
KCNH8	219.871	1.08356	0.183232	5.91357	3.34763e-09	4.31082e-08
NTN4	170.738	1.08183	0.190086	5.69128	1.26088e-08	1.47499e-07
ZNF524	60.2018	1.08113	0.260634	4.14806	3.35305e-05	0.000193924
FAM214B	198.228	1.08066	0.186781	5.7857	7.22123e-09	8.78186e-08
GGT7	291.732	1.08043	0.17386	6.21436	5.15353e-10	7.58221e-09
AIM1	59.0936	1.08039	0.25786	4.18983	2.79165e-05	0.000164403
DCLK3	206.696	1.07986	0.18982	5.68882	1.27918e-08	1.49098e-07
UST	223.204	1.07885	0.189771	5.68499	1.30823e-08	1.52073e-07
FAM212B	702.35	1.0788	0.136167	7.92268	2.32447e-15	7.22715e-14
COL13A1	128.658	1.07714	0.222123	4.84932	1.23888e-06	9.91025e-06
KLHDC8B	249.602	1.07698	0.18571	5.79928	6.65996e-09	8.16083e-08
MLXIPL	41.7528	1.07692	0.273083	3.94356	8.02811e-05	0.000422975
NACAD	44.6621	1.07554	0.277217	3.87978	0.000104553	0.000533429
FAM116B	39.5099	1.07475	0.284805	3.77362	0.000160893	0.00078287
TMEM175	151.767	1.07438	0.196251	5.47449	4.38766e-08	4.68659e-07
CEND1	41.9553	1.07411	0.283221	3.79247	0.000149156	0.000731494
FMNL1	115.42	1.0734	0.236565	4.53746	5.69367e-06	3.89531e-05
GAB3	51.4203	1.07119	0.264149	4.05527	5.00761e-05	0.00027731
DACT1	359.143	1.07072	0.159031	6.73282	1.66411e-11	3.13003e-10
KLHL36	51.054	1.07054	0.266738	4.01344	5.98398e-05	0.000325924
PIK3R1	494.758	1.06882	0.161787	6.60631	3.94031e-11	7.003e-10
DOCK5	442.033	1.06765	0.151261	7.05832	1.68525e-12	3.60012e-11
LOC100499467	61.1322	1.06718	0.261984	4.07346	4.63189e-05	0.000258277
NCALD	184.407	1.06703	0.197933	5.39086	7.01202e-08	7.215e-07
DMD	142.803	1.06522	0.208506	5.10882	3.24171e-07	2.96862e-06
BOLA1	159.616	1.06475	0.206211	5.16341	2.42492e-07	2.26894e-06
C20orf112	265.284	1.06345	0.184679	5.75837	8.49286e-09	1.01749e-07
BTBD18	32.1327	1.06335	0.296318	3.58852	0.000332555	0.00148169
TRIM46	139.329	1.0626	0.2154	4.93316	8.09111e-07	6.75725e-06
C1orf133	23.1526	1.06176	0.302669	3.508	0.000451497	0.00195454
GMIP	108.729	1.06004	0.217155	4.88149	1.05286e-06	8.58723e-06
PER3	198.441	1.06004	0.195963	5.40938	6.32417e-08	6.55955e-07
PTPN21	74.8601	1.05849	0.248499	4.25953	2.04861e-05	0.000123925
PRKG1	51.726	1.05807	0.268049	3.94729	7.90413e-05	0.000417295
LOC155060	155.876	1.05765	0.203963	5.18549	2.1545e-07	2.03808e-06
CAPN5	62.3973	1.05661	0.256468	4.11986	3.79102e-05	0.000216536
CCDC85A	103.1	1.05653	0.223142	4.73478	2.19293e-06	1.65955e-05
AP3B2	309.636	1.05588	0.172058	6.13673	8.42378e-10	1.19573e-08
TMEM108	352.857	1.05539	0.159455	6.61874	3.62279e-11	6.48333e-10
DUSP26	272.275	1.05466	0.178837	5.89733	3.69439e-09	4.71501e-08
CERCAM	188.039	1.05442	0.19567	5.38873	7.09568e-08	7.28945e-07
CKM	303.559	1.05424	0.171573	6.14456	8.01854e-10	1.14198e-08
HR	146.32	1.05295	0.221169	4.76083	1.92795e-06	1.48339e-05
ICAM5	122.371	1.05287	0.233311	4.51273	6.39997e-06	4.34168e-05
OSTF1	122.766	1.05276	0.210747	4.9954	5.8715e-07	5.08456e-06
FAM210B	507.611	1.05137	0.143185	7.34275	2.09254e-13	5.00928e-12
C15orf59	73.6239	1.0511	0.245481	4.28178	1.85404e-05	0.000113216
PIDD	293.878	1.05025	0.173447	6.05519	1.40254e-09	1.91098e-08
ALCAM	2488.85	1.05005	0.140386	7.47974	7.44698e-14	1.86579e-12
RND2	231.674	1.04879	0.17548	5.97671	2.27696e-09	3.00985e-08
AK5	219.623	1.04836	0.179488	5.84085	5.19338e-09	6.51217e-08
SLC4A3	52.5898	1.04792	0.26479	3.95755	7.57212e-05	0.000401958
CNIH3	315.542	1.04725	0.157697	6.64088	3.11816e-11	5.64286e-10
GDF10	27.797	1.04667	0.294373	3.5556	0.000377116	0.00165846
LMX1B	41.948	1.04662	0.280984	3.72485	0.000195432	0.0009247
RHOC	1163.64	1.04523	0.159921	6.53589	6.32325e-11	1.0864e-09
FOXO3	810.514	1.04522	0.135217	7.72995	1.07591e-14	3.06455e-13
DISP2	52.0116	1.0435	0.267571	3.89992	9.62236e-05	0.000496232
EEF1A2	3980.11	1.04279	0.157549	6.61887	3.6195e-11	6.48333e-10
CES3	115.584	1.04143	0.218999	4.75539	1.98068e-06	1.52014e-05
NEURL2	74.5736	1.04133	0.26053	3.99695	6.41645e-05	0.000346553
HTR7	91.3586	1.04015	0.235429	4.41809	9.95779e-06	6.45331e-05
PDE4B	206.455	1.03941	0.179148	5.80197	6.55398e-09	8.05391e-08
LAT	22.3104	1.03927	0.302504	3.43555	0.000591351	0.00247252
OBSL1	1248.96	1.03888	0.144506	7.18922	6.51642e-13	1.48554e-11
AMIGO2	151.069	1.03852	0.195811	5.30371	1.13473e-07	1.12974e-06
LITAF	129.972	1.03821	0.203468	5.1026	3.35015e-07	3.05708e-06
ELL3	48.3125	1.03781	0.26871	3.8622	0.00011237	0.000568593
CTSO	74.5685	1.03745	0.25404	4.0838	4.43046e-05	0.000248549
PLEKHH1	83.1554	1.03739	0.237518	4.36762	1.25606e-05	7.97588e-05
PTGR1	32.0897	1.03717	0.291665	3.55604	0.000376489	0.00165627
BAMBI	388.533	1.03683	0.162144	6.39447	1.61107e-10	2.5632e-09
ITPR1	1370.95	1.0367	0.135828	7.63246	2.30312e-14	6.2431e-13
MAPRE3	93.5356	1.03614	0.230588	4.49346	7.00755e-06	4.70195e-05
DENND3	157.079	1.03611	0.198383	5.22275	1.76281e-07	1.69743e-06
GAA	1034.76	1.03585	0.139348	7.43354	1.05729e-13	2.60847e-12
TPM1	524.094	1.03568	0.143185	7.23318	4.71811e-13	1.091e-11
LOC100505806	44.6111	1.03557	0.27457	3.77162	0.00016219	0.000787929
NAP1L5	268.903	1.03512	0.173333	5.97186	2.34562e-09	3.08832e-08
CLDN11	73.9781	1.03391	0.237673	4.35014	1.36048e-05	8.5714e-05
ELF4	64.3043	1.03353	0.248962	4.15136	3.305e-05	0.000191833
CUL7	569.169	1.03304	0.144931	7.1278	1.01983e-12	2.27268e-11
SCG3	321.333	1.03302	0.174445	5.92179	3.18452e-09	4.1134e-08
RENBP	57.4193	1.0309	0.272698	3.78039	0.000156583	0.000763854
SCRN2	843.042	1.0304	0.163375	6.30696	2.84562e-10	4.3815e-09
TERF2IP	883.987	1.03005	0.128519	8.01481	1.10306e-15	3.60323e-14
PRICKLE4	44.23	1.0296	0.273265	3.76777	0.000164712	0.000798679
PDE1C	121.362	1.02931	0.216354	4.75752	1.95989e-06	1.50527e-05
SSH2	417.689	1.02881	0.166626	6.17434	6.64403e-10	9.59709e-09
CBLN2	45.9769	1.0286	0.274263	3.7504	0.000176551	0.000844971
PRR24	114.518	1.02775	0.224843	4.57094	4.85544e-06	3.36646e-05
C1orf126	29.4516	1.02759	0.297892	3.44953	0.000561569	0.00236486
TCTA	132.527	1.0275	0.211697	4.85363	1.2122e-06	9.73913e-06
NCAM2	220.583	1.0258	0.199007	5.15461	2.54164e-07	2.37471e-06
NQO1	1642.6	1.0255	0.149511	6.85899	6.93498e-12	1.36614e-10
GLI4	120.955	1.02528	0.211872	4.83914	1.30399e-06	1.03618e-05
HMP19	27.1287	1.02509	0.296321	3.45939	0.000541409	0.00229398
ABAT	378.744	1.02466	0.159167	6.43767	1.21319e-10	1.97716e-09
INADL	197.328	1.02365	0.190112	5.38446	7.26625e-08	7.44098e-07
THSD1	27.2281	1.02329	0.297829	3.43582	0.000590759	0.00247085
NAT1	49.3269	1.02254	0.266571	3.83592	0.000125097	0.000626799
SLC9A7	86.089	1.02212	0.229126	4.46093	8.16061e-06	5.386e-05
FLJ43663	92.9071	1.02118	0.231077	4.41923	9.90513e-06	6.4224e-05
CYFIP2	1045.31	1.0209	0.133513	7.64645	2.06605e-14	5.636e-13
SHOX2	28.535	1.02089	0.29348	3.47855	0.000504125	0.00215246
ST8SIA4	178.597	1.01957	0.195867	5.20541	1.93568e-07	1.85008e-06
SLC41A2	56.6693	1.01946	0.26083	3.90853	9.28578e-05	0.000481569
SH2B3	153.822	1.01855	0.198495	5.13138	2.87627e-07	2.66421e-06
FAM196A	44.9178	1.0185	0.277872	3.66534	0.000247012	0.0011391
PODN	35.052	1.01824	0.293296	3.47172	0.000517136	0.00220073
KAL1	269.144	1.01465	0.191716	5.29245	1.20689e-07	1.19238e-06
PARP8	241.911	1.01304	0.184471	5.49158	3.98359e-08	4.28335e-07
L3MBTL1	81.7181	1.01293	0.234796	4.31408	1.60266e-05	9.95144e-05
PCDHA9	22.8684	1.01284	0.301693	3.3572	0.000787373	0.00318242
C1orf54	22.8377	1.01214	0.301789	3.35379	0.000797142	0.00321322
ERO1LB	94.9831	1.0117	0.238833	4.23603	2.27502e-05	0.00013647
GPX3	149.045	1.01121	0.203103	4.9788	6.39791e-07	5.47792e-06
BBS9	288.164	1.01079	0.16035	6.30366	2.90703e-10	4.44951e-09
ITGA6	591.514	1.01031	0.154898	6.52246	6.91616e-11	1.18041e-09
FAM123C	79.8136	1.01004	0.252637	3.99801	6.38782e-05	0.00034573
CRIP2	272.802	1.00858	0.199839	5.04694	4.48931e-07	4.00315e-06
LOC100272228	39.6304	1.00801	0.275798	3.65488	0.000257298	0.00118231
NEIL1	46.5758	1.00675	0.270203	3.72591	0.000194611	0.000922168
EHBP1L1	58.0833	1.00657	0.260134	3.86944	0.000109084	0.000553486
FAT3	273.645	1.00636	0.187743	5.36029	8.30883e-08	8.42175e-07
CROCC	466.673	1.00523	0.164257	6.11982	9.36789e-10	1.31528e-08
CD9	470.765	1.00486	0.158969	6.32113	2.5966e-10	4.02209e-09
ITGA9	535.435	1.00476	0.13911	7.22273	5.09532e-13	1.17402e-11
EMID1	345.667	1.00458	0.17386	5.77809	7.55537e-09	9.1623e-08
RASSF5	49.8347	1.00444	0.266097	3.77472	0.000160188	0.000780261
ITGA7	36.9556	1.00409	0.288527	3.48004	0.000501335	0.00214409
TP53INP2	112.205	1.00356	0.224227	4.47565	7.61804e-06	5.07463e-05
SYP	713.723	1.0028	0.157614	6.36239	1.98643e-10	3.12954e-09
ALPK2	53.9402	1.00189	0.260479	3.84635	0.000119888	0.000603557
LOC100506190	147.034	1.0015	0.210608	4.75529	1.98162e-06	1.52014e-05
NOV	80.2393	1.00132	0.242201	4.13425	3.56123e-05	0.000204679
QSOX1	1206.43	1.00056	0.142738	7.00978	2.38699e-12	4.99179e-11
TBC1D19	446.358	0.998899	0.152492	6.5505	5.73454e-11	9.89208e-10
BTBD8	41.7991	0.998437	0.281917	3.54159	0.000397718	0.00173958
RASSF4	137.995	0.998141	0.208874	4.77868	1.7645e-06	1.36741e-05
COLEC12	146.184	0.998038	0.204933	4.87007	1.11556e-06	9.0586e-06
SRPX	87.8583	0.997176	0.23381	4.26489	1.99997e-05	0.000121153
LRRTM1	73.5502	0.996865	0.251416	3.96501	7.33941e-05	0.000390706
BCAR3	130.936	0.996123	0.205946	4.83681	1.31937e-06	1.04762e-05
DNAH6	110.487	0.995824	0.227066	4.38562	1.15657e-05	7.41099e-05
LOC100272217	36.5002	0.99493	0.283843	3.50522	0.000456234	0.00197279
TLE6	73.5387	0.994728	0.254521	3.90823	9.29734e-05	0.000481588
YPEL3	167.334	0.993905	0.2097	4.73965	2.14093e-06	1.62496e-05
PCDHB14	95.0734	0.99223	0.22867	4.33913	1.4305e-05	8.98622e-05
OGDHL	1013.65	0.991785	0.137455	7.21535	5.37965e-13	1.23074e-11
ADAM15	1202.74	0.989919	0.145805	6.78934	1.12645e-11	2.15648e-10
CRYL1	44.476	0.988181	0.274375	3.60158	0.000316291	0.00141508
DDC	74.6208	0.987986	0.254129	3.88773	0.000101185	0.000518502
TMEM25	83.5402	0.98731	0.233776	4.22331	2.40736e-05	0.000143806
C19orf51	28.832	0.987275	0.296895	3.32534	0.000883113	0.00350286
C2orf89	28.3471	0.987136	0.297266	3.32071	0.000897873	0.0035494
ABTB1	29.0702	0.985085	0.298512	3.29998	0.000966901	0.00378517
WDR44	362.963	0.984342	0.166163	5.92395	3.14298e-09	4.06759e-08
LGR5	156.269	0.983329	0.204699	4.80378	1.557e-06	1.22026e-05
SERPINB8	47.9787	0.982722	0.271098	3.62497	0.000288997	0.00130885
OPRD1	147.749	0.982112	0.211654	4.64018	3.48106e-06	2.50229e-05
UNC5D	30.578	0.981981	0.296042	3.31704	0.00090978	0.00359097
FILIP1L	39.6836	0.981254	0.288924	3.39623	0.000683204	0.00281552
FEZ1	58.2354	0.980705	0.257928	3.80225	0.000143388	0.000706161
C2orf88	44.0951	0.979981	0.274088	3.57542	0.000349667	0.00155096
DKK3	241.296	0.978872	0.17397	5.62666	1.83736e-08	2.08143e-07
MYOG	125.465	0.978333	0.208659	4.68866	2.74999e-06	2.02529e-05
ETS1	62.5127	0.978079	0.257057	3.8049	0.00014186	0.000700236
DST	3188.77	0.977939	0.143848	6.79844	1.05758e-11	2.03065e-10
ID1	1919.29	0.977905	0.145535	6.7194	1.82478e-11	3.41729e-10
MARCH3	51.9097	0.97704	0.263135	3.71308	0.000204752	0.000965612
TECTA	34.0427	0.976473	0.287762	3.39333	0.000690477	0.00284186
ABHD4	59.0949	0.975187	0.261619	3.72751	0.000193384	0.000917026
SMPDL3B	23.0149	0.974406	0.303349	3.21216	0.00131741	0.00494574
SLC12A6	148.962	0.974331	0.218102	4.46731	7.92083e-06	5.24987e-05
WBP1	57.1038	0.973666	0.262982	3.7024	0.000213569	0.00100097
VMAC	52.6564	0.972848	0.2693	3.6125	0.000303254	0.0013648
ADC	102.286	0.972515	0.22423	4.33714	1.44348e-05	9.0549e-05
LRRC17	93.6531	0.972332	0.232032	4.1905	2.78335e-05	0.000164064
SMPD1	124.297	0.97223	0.207545	4.68444	2.80725e-06	2.06158e-05
ST6GALNAC4	169.937	0.972037	0.211492	4.5961	4.30474e-06	3.0187e-05
MAPK8IP1	769.482	0.971955	0.145379	6.68564	2.29913e-11	4.22589e-10
ZNF549	99.9258	0.971775	0.236635	4.10665	4.01444e-05	0.000227485
CNR1	518.023	0.967897	0.162474	5.95723	2.56556e-09	3.36075e-08
ATP9A	508.932	0.967116	0.149539	6.46734	9.97463e-11	1.65427e-09
STXBP5L	87.6329	0.96681	0.231192	4.18185	2.89147e-05	0.000169662
VCL	1665.94	0.965927	0.117833	8.19745	2.45535e-16	8.65611e-15
DNAH10	109.532	0.965182	0.218728	4.4127	1.0209e-05	6.60285e-05
SLIT1	86.9046	0.964772	0.236587	4.07788	4.54484e-05	0.000253916
ACSF2	490.535	0.963217	0.15495	6.21629	5.09039e-10	7.49786e-09
SAT1	71.6625	0.961033	0.244964	3.92316	8.73961e-05	0.000456547
TBC1D10A	94.0577	0.960773	0.241495	3.97844	6.93692e-05	0.000371837
SYNE1	1150.22	0.960707	0.126643	7.58592	3.30139e-14	8.67572e-13
EFNB2	60.2802	0.960103	0.255332	3.76022	0.000169764	0.00081948
ABCA10	241.414	0.959626	0.196535	4.88273	1.04629e-06	8.54448e-06
CCDC74A	209.403	0.959056	0.181926	5.27169	1.35175e-07	1.32033e-06
TRIM9	463.442	0.958046	0.149493	6.40861	1.46848e-10	2.34213e-09
AP1G2	138.009	0.957852	0.202874	4.72142	2.34202e-06	1.75897e-05
DNAJB5	257.205	0.957149	0.1672	5.72457	1.03695e-08	1.23202e-07
TMEM101	209.674	0.957108	0.192945	4.96052	7.03049e-07	5.95308e-06
SYTL3	325.322	0.95585	0.160076	5.97124	2.35455e-09	3.09691e-08
SLC22A5	117.442	0.955124	0.221708	4.30803	1.64713e-05	0.000101982
TMEM37	32.1903	0.954199	0.289972	3.29066	0.000999521	0.00389632
TDH	51.9579	0.953876	0.269347	3.54144	0.000397947	0.00173966
GRIA3	63.5171	0.952906	0.253558	3.75813	0.000171186	0.000823879
ERVK13-1	437.999	0.95272	0.152101	6.26374	3.75843e-10	5.6653e-09
SVOP	23.589	0.95142	0.302567	3.14449	0.00166376	0.00606085
TAOK3	73.5768	0.950879	0.24438	3.89099	9.98362e-05	0.000512813
HGFAC	22.2203	0.950841	0.302996	3.13814	0.00170026	0.00617117
MOB3C	114.013	0.95081	0.217499	4.37157	1.23357e-05	7.8477e-05
UBE2Q2P1	52.1835	0.949909	0.265349	3.57985	0.000343792	0.00152753
CAMK2B	60.4742	0.949661	0.254297	3.73446	0.000188121	0.000893713
HMGCL	174.249	0.949527	0.201391	4.71483	2.41908e-06	1.80528e-05
TBX3	420.264	0.9486	0.160737	5.90156	3.60075e-09	4.61375e-08
TMC3	21.8127	0.947655	0.303784	3.1195	0.00181159	0.00652019
IFI6	195.658	0.946111	0.187473	5.04664	4.49647e-07	4.00676e-06
KIAA1908	69.36	0.945564	0.248532	3.8046	0.000142034	0.000700561
SEMA3D	240.664	0.944935	0.200208	4.71977	2.36114e-06	1.76969e-05
C4orf34	156.2	0.944711	0.197788	4.77638	1.78475e-06	1.38144e-05
PRRX1	1797.6	0.943835	0.168226	5.61053	2.01709e-08	2.27107e-07
LPAR2	36.762	0.943239	0.28201	3.3447	0.00082373	0.00330491
RSPH4A	43.132	0.942274	0.271627	3.469	0.000522408	0.00222096
CCNDBP1	564.514	0.942261	0.152672	6.1718	6.75152e-10	9.72265e-09
ENO2	274.228	0.941387	0.174216	5.40356	6.53296e-08	6.77067e-07
KCNK10	47.3647	0.940999	0.273753	3.4374	0.000587322	0.00245966
SGSH	271.291	0.940935	0.171479	5.48718	4.08394e-08	4.37666e-07
ANKRD13A	1046.27	0.939783	0.124097	7.57295	3.64849e-14	9.52964e-13
NOTCH2NL	30.1035	0.939678	0.294556	3.19015	0.00142197	0.00527382
SGK1	41.8528	0.939597	0.284364	3.30421	0.00095245	0.00373767
MR1	45.3692	0.939564	0.27187	3.45592	0.000548409	0.00231776
MOK	102.012	0.938917	0.21933	4.28084	1.86193e-05	0.000113591
PTER	93.8997	0.938914	0.23181	4.05035	5.11405e-05	0.000282719
DGKB	273.933	0.938135	0.187854	4.99397	5.9152e-07	5.11554e-06
RHPN1	164.077	0.937972	0.209728	4.47232	7.73737e-06	5.1382e-05
LOC100505695	32.1197	0.937784	0.291322	3.21906	0.0012861	0.00484514
GPRASP1	237.196	0.936806	0.187288	5.00196	5.6751e-07	4.93768e-06
PTRH1	123.66	0.936716	0.225909	4.14644	3.3769e-05	0.000195041
FZD6	62.4202	0.936525	0.253063	3.70076	0.000214958	0.00100639
STAT2	1011.73	0.935771	0.124604	7.50994	5.91561e-14	1.5103e-12
CDO1	279.592	0.935724	0.166538	5.61868	1.92427e-08	2.17701e-07
MXD1	184.246	0.934781	0.198506	4.70909	2.48825e-06	1.85262e-05
TMEM130	38.143	0.934459	0.302933	3.0847	0.00203758	0.00719115
FAM18B2	85.4409	0.932344	0.237319	3.92865	8.54242e-05	0.00044806
HECW2	216.139	0.931984	0.183083	5.09051	3.57104e-07	3.2403e-06
SAT2	407.432	0.931756	0.149605	6.2281	4.72127e-10	7.01019e-09
PHLDB1	234.684	0.931357	0.186001	5.00726	5.52111e-07	4.81995e-06
KSR1	99.73	0.931223	0.224349	4.15078	3.31351e-05	0.000192154
LOC100130705	38.9711	0.931221	0.282939	3.29124	0.000997458	0.00389255
TMEM196	27.0212	0.930986	0.299748	3.10589	0.00189705	0.0067811
KLF9	342.189	0.930948	0.161751	5.75545	8.64123e-09	1.03334e-07
FAM181B	91.3575	0.930677	0.247088	3.76658	0.000165502	0.000802204
GAB2	399.017	0.929931	0.154272	6.02787	1.66136e-09	2.23997e-08
GPER	27.1927	0.928503	0.298831	3.10712	0.0018892	0.00675992
N4BP3	44.8756	0.928005	0.283303	3.27566	0.00105415	0.00408704
SDC3	370.685	0.927363	0.16266	5.70122	1.18954e-08	1.40042e-07
AKNA	60.2155	0.926811	0.254533	3.64122	0.000271354	0.00123676
PCDH9	224.549	0.926516	0.180833	5.12359	2.99765e-07	2.77267e-06
NEK10	56.7631	0.926516	0.261138	3.54799	0.000388187	0.00170193
IRF5	27.2321	0.92647	0.297149	3.11786	0.00182169	0.00655473
ZMYND12	30.9038	0.926418	0.291227	3.18109	0.00146723	0.00541678
SCN3A	92.1287	0.926274	0.236015	3.92464	8.68578e-05	0.000454103
GDNF	36.869	0.925232	0.28472	3.24962	0.00115558	0.00440946
DUSP15	32.2031	0.925091	0.297373	3.11088	0.00186533	0.00668751
TUFT1	280.382	0.924753	0.165012	5.60416	2.09271e-08	2.34656e-07
SPRY2	116.725	0.9246	0.218464	4.23227	2.31342e-05	0.00013858
LINC00472	67.313	0.923756	0.244794	3.7736	0.000160906	0.00078287
PPAPDC3	44.7433	0.923753	0.273919	3.37236	0.00074528	0.00303355
SLC9A3	170.233	0.923608	0.1992	4.63659	3.54207e-06	2.54331e-05
USP35	234.803	0.923604	0.190862	4.83912	1.30416e-06	1.03618e-05
TNK1	41.6782	0.92347	0.275064	3.3573	0.000787089	0.00318242
KIF26B	251.188	0.922949	0.173499	5.31962	1.03985e-07	1.04009e-06
CCDC92	167.287	0.921842	0.191156	4.82246	1.41802e-06	1.11906e-05
SNCA	149.463	0.921086	0.193467	4.76095	1.92682e-06	1.48339e-05
TNRC18	262.207	0.9205	0.186652	4.93163	8.1546e-07	6.78831e-06
BIK	25.1741	0.920036	0.300789	3.05875	0.00222266	0.00775527
FAM171B	345.772	0.919738	0.191172	4.81105	1.50141e-06	1.17982e-05
LOC400604	42.8982	0.919607	0.287512	3.1985	0.00138145	0.00514939
DCX	444.468	0.919597	0.164656	5.58497	2.33737e-08	2.60216e-07
VSIG10L	50.1079	0.919534	0.267731	3.43454	0.000593562	0.00248096
GPR153	196.384	0.918659	0.207158	4.43458	9.22525e-06	6.01787e-05
TMEM198	145.925	0.918429	0.196814	4.66648	3.06403e-06	2.22985e-05
ARHGAP6	182.983	0.918407	0.190535	4.82014	1.43459e-06	1.13145e-05
L3MBTL4	111.865	0.917701	0.21505	4.26738	1.97786e-05	0.000119983
MAN2A2	148.137	0.917167	0.204117	4.49334	7.01145e-06	4.70212e-05
TRIL	120.998	0.916244	0.211766	4.32668	1.51371e-05	9.44915e-05
PDLIM5	362.785	0.91606	0.177458	5.16212	2.44171e-07	2.283e-06
MAPK8IP2	523.458	0.916012	0.182192	5.02772	4.96357e-07	4.37167e-06
ZSWIM5	452.131	0.915766	0.148149	6.1814	6.35343e-10	9.21105e-09
GNS	2814.4	0.915339	0.114201	8.01515	1.10002e-15	3.60244e-14
LRRC16B	102.771	0.914879	0.238845	3.83043	0.000127921	0.00063827
TMTC2	199.264	0.914867	0.18186	5.0306	4.88938e-07	4.31811e-06
GDE1	1520.15	0.914445	0.119428	7.65689	1.90491e-14	5.26317e-13
PCGF5	244.363	0.914042	0.201237	4.54211	5.56939e-06	3.82244e-05
TSPYL1	2107.52	0.914026	0.124008	7.37072	1.69708e-13	4.08534e-12
GPR160	57.387	0.913498	0.259711	3.51736	0.000435854	0.001891
ZFHX4	584.868	0.91218	0.149859	6.08694	1.15089e-09	1.59505e-08
CPZ	29.4616	0.911081	0.295261	3.08568	0.00203087	0.00717376
LYSMD2	83.786	0.91107	0.239465	3.80461	0.000142028	0.000700561
TRIM66	45.2947	0.911037	0.270748	3.36488	0.000765756	0.00310611
WDR66	62.1983	0.910958	0.250082	3.64264	0.000269857	0.00123125
ATP7B	200.597	0.910345	0.182424	4.99028	6.02925e-07	5.19328e-06
CDK18	42.1327	0.910319	0.276607	3.29102	0.00099824	0.00389368
SIDT2	100.574	0.910282	0.219182	4.15309	3.28012e-05	0.00019056
DHRS1	140.04	0.910279	0.208391	4.36812	1.25318e-05	7.96148e-05
TRIM14	43.8271	0.909237	0.272734	3.33379	0.000856711	0.00341283
RHBDF2	95.1215	0.90922	0.229789	3.95677	7.59707e-05	0.000402873
CHRNA7	107.237	0.908281	0.222534	4.08153	4.474e-05	0.000250665
C12orf34	166.747	0.908199	0.219468	4.13818	3.50067e-05	0.000201558
ARHGAP44	125.65	0.906978	0.206486	4.39245	1.1208e-05	7.20206e-05
RPS27L	2192.27	0.906938	0.117509	7.71806	1.18117e-14	3.34225e-13
EOMES	27.6974	0.906416	0.296236	3.05977	0.00221504	0.00773495
NKD1	160.134	0.904852	0.1934	4.67866	2.88751e-06	2.1133e-05
AKD1	72.3048	0.904405	0.24407	3.70552	0.000210959	0.000990901
ICA1	528.141	0.903504	0.140855	6.41441	1.41367e-10	2.27439e-09
AHR	104.512	0.903429	0.241116	3.74686	0.00017906	0.00085611
GDAP1L1	124.35	0.902631	0.219115	4.11945	3.79779e-05	0.000216827
GRHL1	43.6067	0.90221	0.275875	3.27036	0.00107411	0.00414948
DAB1	70.0032	0.90144	0.245314	3.67464	0.000238184	0.00110391
LOC375190	92.9945	0.90139	0.232203	3.88191	0.00010364	0.00052961
ERAP1	286.761	0.901304	0.173839	5.18469	2.16371e-07	2.04381e-06
EDA2R	131.619	0.89882	0.207463	4.33243	1.47473e-05	9.22812e-05
KIAA0247	186.624	0.898486	0.189263	4.7473	2.06154e-06	1.57397e-05
ARAP2	44.1865	0.897566	0.272862	3.28945	0.00100384	0.0039108
RNF217	59.8618	0.896093	0.257907	3.47448	0.000511847	0.0021811
BAIAP3	37.0132	0.895474	0.288563	3.10322	0.00191428	0.00682886
ZDHHC8	205.501	0.894603	0.175656	5.09292	3.52582e-07	3.20604e-06
LOC100506990	32.2291	0.89433	0.288949	3.09512	0.00196735	0.00698919
DLGAP1	32.3688	0.892168	0.28788	3.0991	0.00194112	0.00691311
KIAA0284	340.097	0.891799	0.183508	4.85972	1.1755e-06	9.4797e-06
LOC146880	425.327	0.891674	0.152791	5.83591	5.34976e-09	6.66936e-08
DGKA	58.9308	0.88967	0.256817	3.46421	0.000531788	0.00225861
TMEM86A	100.926	0.889631	0.222557	3.99731	6.40662e-05	0.000346316
SRGAP3	194.277	0.889601	0.183822	4.83947	1.30184e-06	1.03561e-05
FHL3	70.5664	0.888687	0.248111	3.5818	0.000341229	0.00151719
CNTN1	881.757	0.888526	0.160685	5.5296	3.20955e-08	3.51552e-07
LINGO1	28.0709	0.887941	0.2974	2.98568	0.00282947	0.00954227
DNAJC4	120.989	0.886768	0.225921	3.92512	8.66877e-05	0.000453581
PSAP	5395.57	0.886639	0.115031	7.7078	1.28004e-14	3.60619e-13
C9orf135	36.9673	0.886067	0.286848	3.08898	0.00200845	0.00710975
TRADD	89.8706	0.885948	0.251356	3.52468	0.000423999	0.00184328
NR0B1	26.7049	0.885614	0.301956	2.93292	0.00335789	0.0110612
LOC100130417	99.1751	0.885495	0.223714	3.95815	7.55313e-05	0.000401227
NHS	56.2418	0.884704	0.278124	3.18097	0.00146783	0.00541746
NRBP2	194.661	0.88441	0.203234	4.35168	1.35098e-05	8.52406e-05
SERPINB1	85.1629	0.883908	0.228762	3.86387	0.000111604	0.000565157
TMX4	1124.47	0.883308	0.129447	6.82371	8.87217e-12	1.72147e-10
FN1	2768.79	0.883259	0.138849	6.36128	2.00075e-10	3.141e-09
DLL1	311.269	0.881646	0.180346	4.88864	1.01535e-06	8.31812e-06
IFT57	790.431	0.880491	0.135762	6.48554	8.84154e-11	1.47967e-09
FSCN2	29.3723	0.880036	0.294009	2.99323	0.00276045	0.00934124
APBB3	418.915	0.879587	0.15429	5.70088	1.19187e-08	1.40189e-07
BBS12	111.236	0.879538	0.213716	4.11546	3.86408e-05	0.00021993
LOC100131096	30.3639	0.878877	0.292317	3.00659	0.00264199	0.00897864
ABTB2	75.3819	0.878581	0.252556	3.47875	0.000503756	0.00215231
TRIM7	51.6273	0.877982	0.266767	3.29119	0.00099765	0.00389255
KIFAP3	785.498	0.876884	0.144556	6.06607	1.31081e-09	1.80122e-08
CCPG1	44.0251	0.87625	0.285546	3.06869	0.00215003	0.00753128
MAN2B2	186.215	0.875845	0.190431	4.59928	4.23954e-06	2.98108e-05
EID3	29.5569	0.875683	0.293715	2.98141	0.00286926	0.00965626
MSC	56.6092	0.875425	0.265456	3.29782	0.000974395	0.00381219
NHSL1	39.3845	0.875015	0.27575	3.17322	0.00150759	0.0055499
RDH10	399.209	0.875011	0.149205	5.86448	4.5054e-09	5.69933e-08
AFF1	345.228	0.874282	0.164609	5.31126	1.08873e-07	1.08561e-06
SLC27A1	91.5048	0.874276	0.242425	3.60638	0.000310501	0.00139208
NOL4	207.954	0.874145	0.17937	4.87342	1.09685e-06	8.91784e-06
CPEB1	114.234	0.873897	0.218626	3.99722	6.40911e-05	0.000346316
EGR1	32.0531	0.873827	0.291019	3.00265	0.00267641	0.00908304
KIF13B	369.061	0.872793	0.160682	5.43181	5.57864e-08	5.84738e-07
GAS6	48.7766	0.872297	0.266617	3.27172	0.00106895	0.00413611
RAB6B	138.193	0.871857	0.199708	4.36566	1.26739e-05	8.03991e-05
FOXP4	80.7889	0.871525	0.248965	3.50059	0.000464223	0.0020033
PAOX	43.31	0.871481	0.286017	3.04696	0.00231171	0.0080183
PARP10	21.5925	0.871186	0.30553	2.85139	0.0043528	0.0138267
TBC1D17	99.2021	0.870948	0.228679	3.8086	0.000139755	0.000691432
KALRN	654.363	0.870503	0.135039	6.44629	1.14618e-10	1.8768e-09
CPXM1	686.353	0.870433	0.137959	6.30934	2.80222e-10	4.31984e-09
TFAP2E	29.2535	0.869894	0.294416	2.95464	0.00313031	0.0104126
DRP2	32.4127	0.869528	0.289986	2.99852	0.00271292	0.00919728
UNC13D	48.6478	0.869477	0.275631	3.1545	0.00160772	0.00588493
GRAMD1B	47.52	0.869245	0.280201	3.10222	0.00192078	0.00684826
SEMA6A	345.852	0.869162	0.180559	4.81374	1.48129e-06	1.16543e-05
SULT1C4	308.373	0.868181	0.161641	5.37104	7.8285e-08	7.98507e-07
SNAI2	278.505	0.867079	0.177611	4.88191	1.05065e-06	8.5747e-06
TMEM63B	362.484	0.867062	0.162753	5.32746	9.95958e-08	9.99288e-07
TSPAN2	81.4866	0.863875	0.246488	3.50474	0.000457058	0.00197502
B4GALT6	122.623	0.863848	0.235625	3.66621	0.000246175	0.00113605
CAPS	31.5259	0.863482	0.292673	2.95033	0.00317435	0.0105346
RAB3IP	225.309	0.862938	0.182706	4.7231	2.32281e-06	1.74759e-05
SERTAD1	152.21	0.862551	0.208122	4.14444	3.40648e-05	0.000196485
ZNF641	403.23	0.862384	0.155716	5.53817	3.05648e-08	3.35927e-07
SPAG1	73.4802	0.862318	0.250313	3.44496	0.000571153	0.00239818
CD59	742.01	0.862079	0.133063	6.47874	9.24889e-11	1.53985e-09
LOC100505875	69.4256	0.861921	0.242714	3.55118	0.000383502	0.00168425
ZNF385D	160.847	0.86159	0.194549	4.42866	9.48182e-06	6.16964e-05
FURIN	175.348	0.861022	0.190596	4.51751	6.25707e-06	4.25145e-05
HSD17B11	506.646	0.860605	0.151289	5.68847	1.28181e-08	1.49271e-07
AGTR1	54.2241	0.860378	0.262112	3.28248	0.00102898	0.00399545
CSAD	141.138	0.860358	0.214383	4.01317	5.99078e-05	0.000326156
CDR1	46.6402	0.860295	0.267554	3.2154	0.00130262	0.00489593
FAR2	51.4903	0.85957	0.27379	3.13953	0.00169221	0.00614538
LRRC4C	21.0689	0.85939	0.304606	2.82132	0.00478262	0.0150075
VAT1	1498.47	0.859365	0.127017	6.76575	1.32624e-11	2.51655e-10
KIAA1614	124.774	0.859246	0.216171	3.97484	7.04257e-05	0.000376586
FIGNL2	28.8573	0.85893	0.297047	2.89156	0.00383334	0.0123964
NALCN	41.4166	0.858371	0.282259	3.04108	0.00235734	0.00814809
ING4	376.142	0.857403	0.15062	5.6925	1.25192e-08	1.46726e-07
SLC30A3	36.6745	0.8569	0.291412	2.94051	0.0032767	0.0108325
HEATR5A	869.805	0.856775	0.154406	5.54884	2.87568e-08	3.16865e-07
LINC00087	39.0909	0.856376	0.287828	2.9753	0.00292699	0.00982746
CRELD1	253.052	0.8563	0.18205	4.70365	2.55551e-06	1.89614e-05
DNAJC1	451.143	0.856112	0.150899	5.67342	1.39973e-08	1.61401e-07
TMEM53	41.8842	0.856097	0.285738	2.99609	0.00273464	0.00925875
KIAA1875	23.1747	0.855546	0.302557	2.82772	0.00468806	0.0147321
SLC2A11	103.089	0.855095	0.219826	3.88987	0.000100298	0.000514776
AK7	37.5855	0.854259	0.280748	3.0428	0.00234388	0.00810614
CHST8	540.011	0.854148	0.170827	5.00009	5.73037e-07	4.97905e-06
KDM5B	4118.68	0.853973	0.117241	7.28392	3.24251e-13	7.62079e-12
LHX8	402.189	0.853816	0.154397	5.53	3.2023e-08	3.51056e-07
PMEL	24.4603	0.853071	0.300373	2.84004	0.00451073	0.0142442
SLC7A14	235.007	0.853052	0.187126	4.55871	5.14691e-06	3.55136e-05
FLJ20021	45.8659	0.852845	0.274739	3.10421	0.00190791	0.00681177
CHST2	1433.96	0.85276	0.148544	5.74078	9.42424e-09	1.12178e-07
FMN2	107.523	0.852424	0.223728	3.81009	0.000138917	0.000688079
SMPD3	116.11	0.85219	0.21034	4.05149	5.08931e-05	0.000281472
DLX3	65.713	0.851961	0.260301	3.27299	0.00106417	0.00412217
SELM	288.794	0.851489	0.196325	4.33713	1.44354e-05	9.0549e-05
DBX2	37.0544	0.850996	0.28995	2.93498	0.0033357	0.0109994
IGFBP5	676.58	0.850497	0.13843	6.14388	8.05288e-10	1.1456e-08
MAP2	984.394	0.850074	0.154779	5.49217	3.97028e-08	4.27618e-07
SQSTM1	2356.74	0.849255	0.129368	6.56467	5.21485e-11	9.06836e-10
APCDD1	98.2271	0.849211	0.22376	3.79518	0.000147536	0.000724377
FERMT3	25.0613	0.848241	0.299475	2.83243	0.0046196	0.0145471
HBEGF	48.3219	0.847316	0.2689	3.15104	0.00162688	0.00594496
TPPP	116.427	0.846887	0.212166	3.99162	6.56233e-05	0.000353396
MARC2	90.3872	0.846839	0.231209	3.66265	0.000249616	0.00115028
CHN2	161.701	0.846714	0.194992	4.34231	1.40994e-05	8.86141e-05
SUSD5	222.707	0.845488	0.186096	4.54329	5.53833e-06	3.80314e-05
EMP3	33.7737	0.845405	0.290732	2.90785	0.0036392	0.0118487
EPHX4	37.6934	0.843579	0.280936	3.00274	0.00267561	0.00908272
AEBP1	184.773	0.84357	0.206776	4.07963	4.51082e-05	0.00025218
DGKI	53.834	0.843392	0.263206	3.2043	0.0013539	0.00505626
IQGAP2	292.801	0.843348	0.17148	4.91804	8.74141e-07	7.22552e-06
CDYL2	45.9266	0.843298	0.273295	3.08566	0.00203098	0.00717376
HECA	393.576	0.84277	0.161834	5.20763	1.91271e-07	1.82948e-06
SORL1	186.644	0.842673	0.193412	4.35688	1.31932e-05	8.34468e-05
ID4	288.827	0.84261	0.170106	4.95344	7.2913e-07	6.14097e-06
NUDT14	144.648	0.842545	0.227925	3.69659	0.000218514	0.00102044
KIAA1107	110.164	0.842539	0.240856	3.4981	0.000468588	0.00202079
RPRML	121.846	0.841937	0.236223	3.56416	0.000365016	0.00161129
SYNPO2	1414.68	0.841434	0.153718	5.47387	4.40317e-08	4.69926e-07
TMC6	186.893	0.84137	0.192005	4.38201	1.17588e-05	7.52225e-05
B3GAT2	90.9269	0.841237	0.230554	3.64877	0.000263499	0.00120736
IFI44L	265.802	0.840916	0.178094	4.72175	2.33824e-06	1.75715e-05
LMTK3	20.8898	0.840838	0.30346	2.77083	0.00559131	0.0171978
FZD5	93.6443	0.840112	0.227044	3.70022	0.00021541	0.00100814
PDIA3P	60.4349	0.840087	0.25489	3.29588	0.000981124	0.0038362
GLB1L	90.1781	0.83955	0.245509	3.41964	0.000627047	0.00260405
FAM151B	34.036	0.839429	0.287197	2.92283	0.00346865	0.0113709
TESK1	125.489	0.83806	0.22234	3.76927	0.000163722	0.000794422
LIPG	46.3561	0.838031	0.28199	2.97185	0.00296016	0.00992076
ARVCF	478.179	0.837591	0.171655	4.87949	1.0636e-06	8.66939e-06
MID1	459.621	0.83688	0.172889	4.84055	1.2948e-06	1.03129e-05
LOC375010	210.034	0.836677	0.199804	4.18749	2.82058e-05	0.000165876
NPR2	157.347	0.836591	0.203433	4.11237	3.91616e-05	0.000222502
PIK3R2	729.578	0.836439	0.153516	5.44855	5.07826e-08	5.34897e-07
SEMA5A	274.605	0.836127	0.178872	4.67445	2.94736e-06	2.15222e-05
PDE3A	649.435	0.835716	0.185738	4.49943	6.81368e-06	4.58617e-05
POLR3GL	545.286	0.83505	0.143894	5.80325	6.50419e-09	8.00034e-08
MGC12916	41.2652	0.835034	0.282363	2.95731	0.0031034	0.0103391
TNIK	568.44	0.834665	0.147969	5.64082	1.6924e-08	1.92397e-07
SRGAP1	92.2727	0.834249	0.236376	3.52933	0.000416609	0.00181482
RERG	443.845	0.834016	0.164523	5.0693	3.99287e-07	3.58749e-06
LMBR1L	313.385	0.833372	0.1644	5.06918	3.99537e-07	3.58749e-06
CCDC109B	126.946	0.832732	0.206593	4.03078	5.55909e-05	0.00030523
DLK2	59.5908	0.832712	0.260603	3.19532	0.00139674	0.00519872
STON2	1169.73	0.832415	0.156337	5.32449	1.01234e-07	1.01494e-06
TBC1D9	293.187	0.832235	0.168444	4.94073	7.78326e-07	6.53399e-06
SCARNA2	17319.1	0.8317	0.16383	5.07662	3.84211e-07	3.46434e-06
ACCN2	128.361	0.830441	0.214424	3.8729	0.000107548	0.000546338
TBX2	7682.35	0.829842	0.13956	5.94613	2.74562e-09	3.57845e-08
GPRC5C	325.13	0.82982	0.187012	4.43726	9.11133e-06	5.94957e-05
TNFRSF12A	42.5506	0.829249	0.280567	2.95562	0.00312045	0.0103878
SRCRB4D	32.3389	0.828732	0.291165	2.84627	0.00442351	0.0140168
SCN2A	27.2733	0.828309	0.29943	2.76629	0.00566984	0.0174144
ADAMTS9	679.486	0.827527	0.14323	5.7776	7.57728e-09	9.18024e-08
ABCC10	270.099	0.82745	0.169152	4.89175	9.99433e-07	8.19815e-06
CMPK2	53.3741	0.827324	0.271374	3.04865	0.00229873	0.0079797
SPNS2	33.5057	0.827019	0.291653	2.83562	0.00457364	0.0144112
ANKRA2	262.6	0.826543	0.186047	4.44266	8.88542e-06	5.81972e-05
KDM6B	98.9926	0.826353	0.218522	3.78155	0.000155854	0.000760872
FOXO1	93.3069	0.826324	0.234355	3.52595	0.000421969	0.00183507
SLC4A8	1066.71	0.825929	0.15822	5.22012	1.78805e-07	1.71789e-06
HSD11B1L	157.657	0.825504	0.220702	3.74037	0.000183753	0.000875219
TST	167.591	0.824843	0.193311	4.26692	1.98191e-05	0.000120172
CDKAL1	800.427	0.824728	0.129212	6.38273	1.73961e-10	2.75076e-09
NRG1	112.303	0.824485	0.227588	3.62272	0.000291526	0.00131892
JHDM1D	413.101	0.823353	0.180685	4.55683	5.19302e-06	3.57936e-05
GAL3ST4	43.3346	0.82332	0.278902	2.952	0.00315719	0.0104858
LOC219347	49.5371	0.822445	0.265369	3.09925	0.00194008	0.00691134
GPR176	234.35	0.82204	0.174773	4.70348	2.55764e-06	1.89662e-05
FAIM2	58.8242	0.820791	0.286555	2.86434	0.00417875	0.013366
TAPBP	217.171	0.820137	0.176437	4.64833	3.34632e-06	2.41216e-05
FRMPD1	149.001	0.819534	0.199371	4.1106	3.94641e-05	0.000224023
S1PR2	86.418	0.818199	0.246152	3.32396	0.000887495	0.00351404
C12orf68	48.9362	0.817761	0.271687	3.00994	0.00261295	0.00890751
MAFA	109.402	0.817193	0.225291	3.62728	0.000286421	0.00129947
CYLD	474.178	0.817128	0.173043	4.72212	2.33401e-06	1.75499e-05
RASGRP2	26.2933	0.816656	0.297527	2.74481	0.00605457	0.0184433
GADD45G	224.551	0.815685	0.199867	4.08115	4.48139e-05	0.00025097
EPHA6	42.2093	0.815472	0.277027	2.94366	0.00324357	0.0107422
IGDCC4	161.211	0.815217	0.197276	4.13236	3.59058e-05	0.000206275
GLT25D2	76.1396	0.815197	0.235704	3.45856	0.000543073	0.00229747
ANKS1A	746.904	0.814984	0.132379	6.15644	7.43996e-10	1.06428e-08
CKMT1B	47.4778	0.814706	0.273772	2.97586	0.00292172	0.00981742
TECPR1	396.612	0.81444	0.167404	4.86511	1.14395e-06	9.25415e-06
ANXA11	272.717	0.813625	0.183597	4.43157	9.35491e-06	6.09628e-05
KIAA0513	113.321	0.813012	0.21377	3.80321	0.000142831	0.000703685
LRCH4	216.583	0.812707	0.194084	4.18739	2.82181e-05	0.000165876
FRY	188.547	0.812225	0.190811	4.2567	2.07471e-05	0.000125328
ALOX12B	31.9536	0.812079	0.288256	2.81722	0.00484421	0.0151637
KLC4	356.009	0.812064	0.160936	5.04588	4.51431e-07	4.01711e-06
ZNF792	129.953	0.81199	0.203553	3.98909	6.63267e-05	0.000356737
TMEM91	43.3589	0.811828	0.280121	2.89813	0.00375395	0.0121763
HOOK2	266.876	0.810716	0.171913	4.71586	2.40695e-06	1.79832e-05
ADAMTS14	33.3366	0.809986	0.291839	2.77545	0.00551247	0.0169958
CREB3L4	1127.19	0.809441	0.134745	6.00719	1.88764e-09	2.52397e-08
MGC21881	98.5372	0.80858	0.2261	3.5762	0.000348629	0.00154742
H6PD	290.706	0.808315	0.163721	4.93715	7.9271e-07	6.64609e-06
RTN2	287.809	0.808131	0.167733	4.81797	1.45024e-06	1.14239e-05
FAM201A	50.9422	0.807902	0.26738	3.02155	0.00251486	0.00861638
SLIT2	152.073	0.807807	0.209612	3.85383	0.000116286	0.000586566
STBD1	37.2846	0.807626	0.285514	2.82867	0.00467418	0.0146992
SMPD2	144.776	0.807522	0.214811	3.75923	0.000170439	0.000821505
SLC43A1	132.217	0.807479	0.207574	3.89007	0.000100214	0.000514551
MYL5	45.8749	0.806889	0.267806	3.01296	0.00258713	0.00883114
ATG2A	305.557	0.806685	0.187847	4.29436	1.75199e-05	0.0001078
SFRP1	1756.65	0.80657	0.129706	6.21844	5.02112e-10	7.41276e-09
RBKS	48.6068	0.806442	0.273751	2.94589	0.00322023	0.0106704
RAB9B	28.017	0.806436	0.298645	2.70032	0.00692726	0.0206712
SYN3	21.9411	0.806303	0.305539	2.63896	0.00831616	0.0241185
TMEM42	248.965	0.806231	0.185023	4.35746	1.31583e-05	8.32673e-05
ZCCHC24	319.291	0.805862	0.160727	5.01384	5.33538e-07	4.67044e-06
ZFAT	239.534	0.805848	0.173472	4.6454	3.39422e-06	2.44532e-05
SGK223	252.545	0.80569	0.180088	4.47387	7.68156e-06	5.10903e-05
TPST1	575.85	0.805239	0.149986	5.36878	7.92708e-08	8.0665e-07
STARD5	32.1515	0.804739	0.288245	2.79186	0.00524055	0.0162566
ARHGAP9	56.302	0.804502	0.25523	3.15207	0.00162116	0.00592573
CLSTN2	95.1975	0.803742	0.223476	3.59655	0.000322464	0.0014407
NPB	56.663	0.803666	0.273477	2.9387	0.00329593	0.0108766
SHKBP1	297.143	0.8032	0.175371	4.57999	4.64994e-06	3.2379e-05
GSC	29.839	0.803102	0.295761	2.71537	0.0066201	0.0198927
ZNF862	67.9898	0.803096	0.243209	3.30208	0.000959717	0.00376161
NHSL2	84.7468	0.802899	0.235256	3.41287	0.000642817	0.00266354
MICALL2	58.7405	0.80026	0.262725	3.04599	0.00231912	0.00804183
EGFEM1P	43.1176	0.799909	0.276046	2.89774	0.00375861	0.0121883
KCTD16	52.3037	0.799446	0.264397	3.02365	0.00249742	0.00856344
DLX5	65.4187	0.798762	0.250005	3.19499	0.00139835	0.0052027
KLHL24	1454.93	0.798457	0.153422	5.20433	1.94693e-07	1.85808e-06
AMDHD1	30.1093	0.798059	0.293618	2.71802	0.00656748	0.0197437
BMPR1B	193.493	0.797511	0.203819	3.91284	9.12152e-05	0.000473812
LOC100507421	116.678	0.795757	0.22025	3.61298	0.000302702	0.00136327
PRKCH	65.362	0.795611	0.249089	3.19408	0.00140276	0.00521758
TBX20	619.57	0.795377	0.143774	5.53213	3.16369e-08	3.47118e-07
SLC26A1	60.0651	0.794866	0.254288	3.12585	0.00177295	0.00640076
SPATA25	26.0891	0.79449	0.298675	2.66005	0.00781294	0.0228647
SYN1	22.3856	0.793691	0.303563	2.61459	0.00893357	0.0256326
KCNV1	26.1975	0.793404	0.298303	2.65973	0.00782033	0.0228811
CNNM2	174.437	0.793285	0.184732	4.29426	1.7528e-05	0.0001078
CABP7	23.791	0.793005	0.305177	2.5985	0.00936307	0.026681
MTMR11	29.1189	0.792669	0.2954	2.68338	0.00728831	0.0215542
DCLK2	113.233	0.791797	0.21442	3.69275	0.000221843	0.00103412
ZDHHC22	141.295	0.791762	0.207325	3.81895	0.000134023	0.000666912
DNAJC28	40.6927	0.791466	0.277857	2.84847	0.00439306	0.013934
ZER1	475.143	0.791365	0.154744	5.11402	3.15369e-07	2.90243e-06
ZFYVE28	29.5438	0.791095	0.298622	2.64916	0.0080693	0.0235083
JUNB	837.87	0.790887	0.169939	4.65395	3.25643e-06	2.35525e-05
ZYX	159.945	0.790355	0.197617	3.99944	6.34935e-05	0.000344081
EFNB1	282.014	0.789967	0.178716	4.42025	9.85884e-06	6.39561e-05
H1FX-AS1	91.7037	0.789601	0.239748	3.29346	0.000989641	0.00386364
ID2	2422.14	0.789323	0.144657	5.45651	4.85582e-08	5.13984e-07
CDH3	343.732	0.789262	0.156124	5.05534	4.29633e-07	3.83902e-06
EFNA3	87.8487	0.789043	0.24093	3.27498	0.00105668	0.00409562
COQ10B	378.176	0.78822	0.149811	5.26142	1.42949e-07	1.39311e-06
TP53TG1	95.2272	0.787688	0.221167	3.56151	0.000368722	0.00162543
MAP3K9	195.294	0.787185	0.180073	4.37148	1.23405e-05	7.8477e-05
NDST3	27.1349	0.785514	0.301167	2.60824	0.00910102	0.0260147
C1QTNF4	50.5076	0.785177	0.275192	2.85319	0.00432822	0.013769
GPR173	83.0832	0.785085	0.240266	3.26756	0.00108477	0.00418564
FBXL20	298.614	0.784998	0.168032	4.67171	2.98702e-06	2.17626e-05
BCL6	40.5568	0.784826	0.286378	2.74053	0.00613407	0.0186494
TLL2	36.4272	0.784809	0.28111	2.79182	0.00524123	0.0162566
MAP1LC3B	229.71	0.784312	0.168903	4.64355	3.42468e-06	2.46588e-05
LTBP4	297.948	0.78422	0.184696	4.246	2.17617e-05	0.000130905
AHCYL2	470.475	0.784017	0.148622	5.27525	1.32574e-07	1.29887e-06
TCN2	31.6304	0.783529	0.287841	2.72209	0.00648713	0.0195569
ARAP3	42.3189	0.782959	0.273874	2.85883	0.0042521	0.0135737
LOC389765	117.538	0.782754	0.20995	3.72828	0.000192787	0.000914872
LOC100505761	160.609	0.782666	0.194863	4.01648	5.90731e-05	0.000322156
ACTL8	51.457	0.782207	0.262154	2.98377	0.00284717	0.00959443
PHLDA1	61.4806	0.782083	0.255265	3.06381	0.00218535	0.00764807
RBM24	230.361	0.781628	0.19223	4.06611	4.78035e-05	0.000265522
VIPR2	60.1515	0.781613	0.255781	3.05579	0.00224467	0.00782359
NLGN2	138.562	0.781594	0.209194	3.73621	0.000186814	0.000888813
LRRC41	1952.51	0.781507	0.126608	6.17263	6.71615e-10	9.68251e-09
CDC42EP3	994.983	0.781338	0.136573	5.72101	1.05895e-08	1.257e-07
C12orf51	492.818	0.780527	0.142344	5.4834	4.17226e-08	4.4639e-07
CARD10	62.3761	0.780096	0.256853	3.03712	0.00238847	0.00824022
CLDN15	109.172	0.779905	0.21826	3.57328	0.000352539	0.00156263
IER2	416.311	0.779678	0.174943	4.45675	8.32133e-06	5.47939e-05
REEP2	240.234	0.779591	0.200268	3.89274	9.91165e-05	0.000509725
PITPNM1	367.917	0.779465	0.186316	4.18356	2.86979e-05	0.000168543
SEMA3A	188.405	0.778978	0.193219	4.03159	5.54012e-05	0.000304317
LYPD6	337.679	0.778845	0.16747	4.65066	3.30869e-06	2.39037e-05
GALNT10	176.876	0.778123	0.190093	4.09339	4.2512e-05	0.000239325
RGL1	385.867	0.777952	0.161168	4.82696	1.38631e-06	1.09538e-05
ECEL1	265.727	0.777809	0.188931	4.11688	3.84028e-05	0.000218962
ADAMTS17	80.2415	0.777727	0.249023	3.12312	0.00178945	0.00645492
PHLDB3	160.838	0.777099	0.211276	3.67813	0.00023495	0.0010901
ADAMTS13	112.77	0.777092	0.215106	3.61259	0.000303148	0.0013648
INPP1	58.6214	0.776873	0.252869	3.07224	0.00212461	0.00745146
TNFRSF11A	57.1723	0.776541	0.252689	3.07311	0.00211843	0.00743179
SHC1	7004.24	0.776408	0.109796	7.07138	1.53404e-12	3.30446e-11
PVRIG	42.5469	0.776007	0.273084	2.84164	0.0044882	0.0141939
KCNN2	111.571	0.775702	0.220854	3.51229	0.000444262	0.00192553
TTC21A	55.9003	0.775439	0.258762	2.99673	0.00272894	0.00924186
DOK1	351.178	0.775391	0.182034	4.25959	2.048e-05	0.000123925
DND1	133.905	0.775069	0.218598	3.54564	0.000391663	0.00171542
LOC100505648	33.9956	0.774673	0.289674	2.67429	0.00748878	0.0220863
FNBP1	324.625	0.77414	0.160931	4.81039	1.50634e-06	1.18298e-05
OTUD1	60.6163	0.773671	0.271619	2.84837	0.00439439	0.0139348
PCDHAC1	152.003	0.772949	0.201358	3.83868	0.000123697	0.000620071
STAMBPL1	343.746	0.771992	0.155397	4.96786	6.76961e-07	5.76937e-06
GRINA	632.987	0.77165	0.163198	4.7283	2.2641e-06	1.7084e-05
SLC6A2	629.613	0.771009	0.151933	5.07468	3.88152e-07	3.49743e-06
TUBG2	169.033	0.769407	0.215363	3.5726	0.000353459	0.00156617
XKR9	44.3549	0.76812	0.281498	2.72869	0.0063587	0.0192146
KIF21B	223.93	0.767636	0.182803	4.19925	2.67803e-05	0.000158217
LOC100133991	51.5934	0.767636	0.264984	2.89692	0.00376848	0.0122111
ANKRD33B	264.999	0.767622	0.169764	4.5217	6.13439e-06	4.17249e-05
PNPLA8	531.67	0.767383	0.150738	5.09084	3.56481e-07	3.23858e-06
FAM131B	167.819	0.767248	0.191467	4.00721	6.144e-05	0.000333794
LOC100506599	39.1022	0.766875	0.280587	2.73311	0.00627394	0.0190074
STAT3	2421.51	0.766098	0.117325	6.52972	6.58917e-11	1.13059e-09
APH1B	330.456	0.766024	0.160031	4.78672	1.6953e-06	1.31933e-05
DDX11L2	46.5612	0.76591	0.268487	2.85269	0.00433511	0.0137875
PROK2	63.9348	0.765408	0.250291	3.05808	0.00222762	0.00777049
MIR612	35.8001	0.76441	0.282036	2.71033	0.00672169	0.0201697
NR4A3	25.2601	0.764168	0.305332	2.50275	0.0123233	0.0336025
STL	34.9382	0.762959	0.288129	2.64798	0.00809754	0.0235799
ANKRD44	149.192	0.762592	0.203326	3.75059	0.000176415	0.000844634
SHROOM1	109.895	0.761964	0.214873	3.54612	0.000390952	0.00171289
TRAK1	915.885	0.761525	0.127793	5.95904	2.5372e-09	3.32699e-08
SEMA6D	444.702	0.760819	0.14882	5.11233	3.18202e-07	2.92225e-06
PEX6	517.082	0.760457	0.153243	4.96244	6.96148e-07	5.90641e-06
MYH15	70.0146	0.76038	0.246666	3.08263	0.0020518	0.0072354
CDKL5	55.1351	0.759421	0.259548	2.92593	0.00343427	0.0112812
KCNK1	85.0092	0.75889	0.228794	3.31692	0.000910173	0.00359142
C3orf70	108.597	0.758294	0.22455	3.37694	0.000732959	0.00299379
LOC401320	142.285	0.758121	0.197871	3.83139	0.00012742	0.000636754
FER1L4	35.8842	0.757898	0.285371	2.65583	0.00791134	0.0231107
SRRM3	90.1876	0.757888	0.234023	3.23852	0.00120152	0.00455977
C1orf106	30.1089	0.757838	0.299278	2.53222	0.0113344	0.031424
RPS2P32	53.1022	0.757662	0.259526	2.91941	0.00350698	0.0114762
HSD11B2	24.9099	0.757284	0.299657	2.52717	0.0114986	0.0317837
RFFL	32.0521	0.75701	0.296719	2.55127	0.0107331	0.0300086
PDE4DIP	158.032	0.756744	0.201223	3.76072	0.000169428	0.00081816
INPP5F	719.98	0.756588	0.140429	5.38769	7.13703e-08	7.3261e-07
ROGDI	273.198	0.75627	0.184393	4.1014	4.1066e-05	0.000232096
BMP8A	30.752	0.75626	0.29715	2.54504	0.0109264	0.030417
RIMS4	411.658	0.755555	0.158006	4.78181	1.73727e-06	1.34793e-05
ZNF814	84.2179	0.755542	0.236416	3.19582	0.00139435	0.00519229
ABCA7	80.4673	0.755502	0.245429	3.0783	0.00208187	0.00731787
ATP10D	610.235	0.755052	0.164256	4.59681	4.29014e-06	3.01208e-05
GLRB	177.127	0.754865	0.188129	4.01249	6.00823e-05	0.000326968
PCNXL2	299.157	0.75388	0.159794	4.71784	2.38363e-06	1.78399e-05
GLRX	130.364	0.753362	0.217751	3.45974	0.000540702	0.00229194
ARHGAP23	193.559	0.753081	0.20133	3.74053	0.000183632	0.000874964
CSMD2	110.022	0.752498	0.224694	3.34899	0.000811053	0.00326013
DDX58	109.404	0.752384	0.219234	3.43188	0.000599408	0.00250134
ERMP1	387.196	0.752323	0.168754	4.4581	8.26906e-06	5.44922e-05
CD82	52.494	0.752141	0.267597	2.81072	0.00494303	0.0154244
GXYLT2	125.517	0.752009	0.204222	3.68231	0.000231132	0.00107354
PPP2R2B	454.465	0.751941	0.160728	4.67833	2.89218e-06	2.11552e-05
TTC25	55.9993	0.751933	0.263118	2.85778	0.00426617	0.0136085
FAM8A1	470.642	0.751891	0.159443	4.71572	2.40855e-06	1.79847e-05
PLEKHA4	26.6905	0.751769	0.296331	2.53692	0.0111832	0.031045
FBXW4	205.929	0.751452	0.188104	3.99488	6.47268e-05	0.000349005
LENG8	485.666	0.750917	0.164693	4.5595	5.12757e-06	3.54181e-05
IDUA	57.7044	0.750712	0.255318	2.9403	0.00327895	0.0108344
EML2	126.48	0.750639	0.205061	3.66057	0.000251658	0.00115887
RFNG	524.321	0.75061	0.162342	4.62365	3.77054e-06	2.68643e-05
CAMK2N2	87.2378	0.750266	0.242252	3.09705	0.00195458	0.00695147
PLA2G6	117.571	0.750258	0.211148	3.55323	0.000380535	0.00167236
SLC24A6	56.4234	0.750144	0.263279	2.84923	0.00438251	0.0139074
PRKCD	40.4091	0.749941	0.277447	2.70301	0.00687157	0.0205431
SLC30A10	20.368	0.749838	0.304582	2.46186	0.013822	0.0369092
MYLIP	79.9195	0.748297	0.244996	3.05432	0.0022557	0.00785779
ENPP1	172.783	0.747936	0.190953	3.91685	8.97143e-05	0.000466956
TTC7A	99.4603	0.747788	0.22724	3.29074	0.000999245	0.00389632
RBM20	153.551	0.747662	0.194272	3.84854	0.000118825	0.000598673
FOXD3	106.655	0.747584	0.221575	3.37395	0.000740971	0.00302268
LOC100506930	130.121	0.747572	0.20832	3.58857	0.000332497	0.00148169
IFI35	45.8687	0.747417	0.283862	2.63303	0.00846261	0.0244608
NRXN2	60.0031	0.747252	0.254182	2.93983	0.00328395	0.0108454
ATF3	182.383	0.746114	0.197697	3.77403	0.000160633	0.000782131
A2LD1	30.2143	0.744989	0.291363	2.55691	0.0105607	0.0295843
SOWAHA	36.9206	0.744981	0.283056	2.63192	0.00849039	0.0245301
GRIA4	61.5409	0.744824	0.259758	2.86738	0.00413892	0.0132517
HOMER3	561.807	0.74477	0.172783	4.31044	1.62928e-05	0.000101022
PPP1R3F	64.5157	0.74471	0.250928	2.96783	0.00299912	0.0100331
LDLRAP1	216.753	0.744569	0.185213	4.02006	5.81823e-05	0.000318104
HIGD1A	2802.43	0.744478	0.12277	6.064	1.32777e-09	1.82063e-08
TNRC6C	510.461	0.743849	0.149057	4.99038	6.02614e-07	5.19328e-06
FOSL2	248.028	0.743551	0.181358	4.0999	4.13335e-05	0.000233403
TRIB3	138.317	0.743483	0.220405	3.37325	0.000742852	0.00302739
SPOCK3	203.122	0.743001	0.187758	3.95723	7.58246e-05	0.000402288
CST3	455.942	0.741893	0.187464	3.95752	7.57313e-05	0.000401958
ZCCHC18	41.228	0.741873	0.279778	2.65165	0.00800994	0.0233512
PKDCC	516.248	0.741533	0.189201	3.91928	8.88145e-05	0.000462832
FTL	12727.8	0.740361	0.135849	5.44988	5.04051e-08	5.31789e-07
HBP1	539.137	0.740124	0.149982	4.93475	8.02526e-07	6.71966e-06
PSD	194.034	0.739932	0.189182	3.91121	9.18338e-05	0.000476834
LMCD1	65.4409	0.739571	0.248585	2.97513	0.00292865	0.0098305
HEYL	53.0441	0.739138	0.259808	2.84494	0.00444203	0.0140686
UNC80	74.7714	0.738346	0.241196	3.06119	0.00220461	0.00770479
AHNAK	7249.49	0.738293	0.149833	4.92745	8.33086e-07	6.92164e-06
EPM2A	178.454	0.737952	0.196403	3.75734	0.000171732	0.000825889
MAPK11	60.3508	0.737947	0.261703	2.81978	0.00480562	0.0150685
DMRTA1	276.668	0.737902	0.162958	4.52817	5.94959e-06	4.05748e-05
FAM113A	767.745	0.737446	0.145439	5.07049	3.96786e-07	3.57024e-06
ANXA2	2272.91	0.736527	0.127728	5.76639	8.09857e-09	9.75685e-08
NAB2	858.476	0.735344	0.149101	4.93184	8.1457e-07	6.78831e-06
HHAT	288.915	0.735045	0.165369	4.44488	8.79402e-06	5.77158e-05
PLBD2	120.332	0.734991	0.221111	3.32408	0.000887112	0.00351404
ENG	30.1438	0.734664	0.291694	2.51861	0.0117818	0.0324208
RGL2	488.143	0.734478	0.153952	4.77083	1.83467e-06	1.41838e-05
C1D	562.089	0.734213	0.176931	4.14971	3.32896e-05	0.000192963
SLC48A1	129.508	0.734073	0.208401	3.52241	0.000427649	0.00185852
MYLK	442.595	0.734063	0.147503	4.9766	6.47105e-07	5.5332e-06
PCYOX1L	343.721	0.733839	0.158735	4.62305	3.78132e-06	2.68885e-05
FAM211B	88.431	0.733414	0.239908	3.05706	0.00223517	0.00779261
GJA3	74.9857	0.733075	0.239556	3.06014	0.0022123	0.00772749
AHNAK2	144.147	0.732982	0.217295	3.37321	0.000742978	0.00302739
TUBB2A	241.576	0.732841	0.184438	3.97336	7.08646e-05	0.000378463
HECTD3	419.343	0.732264	0.156498	4.67908	2.88171e-06	2.11025e-05
CGNL1	59.7181	0.732084	0.260907	2.80592	0.00501726	0.0156333
ZMAT4	106.317	0.73185	0.23517	3.112	0.00185825	0.00666399
COLQ	62.3131	0.73129	0.247297	2.95713	0.00310515	0.0103422
ARRDC3	1614.36	0.730793	0.158805	4.60184	4.18768e-06	2.94944e-05
HEMK1	334.234	0.73051	0.15939	4.58316	4.57999e-06	3.19263e-05
TUBA1A	15065	0.730489	0.117755	6.20346	5.52341e-10	8.10791e-09
LOC100134229	40.849	0.729397	0.282497	2.58197	0.00982393	0.0277951
MAST3	160.654	0.728769	0.202665	3.59592	0.000323244	0.00144369
AQP1	28.7917	0.728001	0.294031	2.47593	0.013289	0.0357448
PLD3	2595.73	0.727484	0.146849	4.95397	7.27144e-07	6.12825e-06
PVR	162.836	0.727151	0.196323	3.70384	0.000212359	0.000996412
CTF1	26.2714	0.726681	0.30274	2.40034	0.0163797	0.0425258
PLEKHA7	36.9713	0.726377	0.281883	2.57687	0.00996984	0.0281851
LOC338758	60.6759	0.726031	0.254215	2.85597	0.00429053	0.0136653
ABCD4	363.279	0.725501	0.156717	4.62937	3.66784e-06	2.6205e-05
PEX16	368.8	0.724848	0.185564	3.90618	9.37651e-05	0.000485105
HSD17B14	100.596	0.724841	0.225477	3.21471	0.00130578	0.00490638
FAM174B	169.218	0.724717	0.193352	3.74817	0.000178127	0.000852198
HYMAI	19.9954	0.724329	0.30557	2.37042	0.0177681	0.0454343
STXBP1	171.38	0.723946	0.209032	3.46333	0.000533525	0.0022645
NAV1	311.841	0.723445	0.162328	4.45669	8.32333e-06	5.47939e-05
CBX7	35.1559	0.723443	0.28845	2.50803	0.0121405	0.0332231
ANKRD18A	82.0056	0.723372	0.253061	2.85849	0.00425658	0.0135846
PCMTD1	530.44	0.723341	0.155848	4.64133	3.46172e-06	2.48978e-05
CELSR3	133.816	0.723204	0.20928	3.45567	0.000548925	0.00231918
GABRE	73.3029	0.723145	0.240433	3.00768	0.00263246	0.0089598
EPB41L1	124.796	0.722929	0.217082	3.33022	0.000867774	0.00345157
GALT	344.172	0.72246	0.160705	4.49558	6.93813e-06	4.66264e-05
MIB2	482.835	0.722409	0.207622	3.47944	0.000502472	0.00214824
DNAJB2	277.465	0.722408	0.164064	4.40321	1.06659e-05	6.87422e-05
APLP1	868.11	0.722102	0.154992	4.65895	3.17823e-06	2.30515e-05
LEPROT	635.89	0.721872	0.1509	4.78376	1.72042e-06	1.33565e-05
PKD1L1	23.7523	0.721048	0.303581	2.37514	0.0175423	0.0449725
RGS9	27.3261	0.72014	0.301229	2.39067	0.0168175	0.0434101
ZBTB8B	94.6189	0.719981	0.230041	3.1298	0.00174928	0.00632771
ADARB1	324.176	0.719899	0.155407	4.63234	3.61555e-06	2.59031e-05
SLITRK2	45.4765	0.719638	0.275972	2.60764	0.00911675	0.0260539
SUSD2	63.4333	0.719101	0.257222	2.79564	0.00517968	0.0160928
MAP3K1	1345.58	0.718752	0.151481	4.74482	2.08688e-06	1.58952e-05
ZNF699	54.1566	0.718738	0.269914	2.66284	0.00774845	0.0227175
ZNF704	1163.32	0.718349	0.158581	4.52985	5.90247e-06	4.02748e-05
NCOA1	502.426	0.718108	0.15192	4.72689	2.2798e-06	1.71925e-05
LTBP3	135.341	0.717669	0.211153	3.39881	0.000676808	0.00279273
NPC1	303.451	0.717601	0.165131	4.34564	1.38873e-05	8.73326e-05
LINC00324	45.6409	0.717541	0.27249	2.63328	0.00845652	0.0244539
TPP1	81.9415	0.717074	0.232762	3.08072	0.00206499	0.00727399
VAV3	475.568	0.716979	0.156113	4.59269	4.37562e-06	3.06174e-05
CCDC136	229.161	0.716559	0.18879	3.79553	0.000147329	0.000723634
FNDC4	111.218	0.716043	0.221912	3.22669	0.0012523	0.00472884
KDELR3	121.041	0.715855	0.20824	3.43764	0.000586807	0.0024583
CHCHD7	171.349	0.715556	0.196489	3.64171	0.000270831	0.00123482
PCK2	323.626	0.715543	0.160796	4.44999	8.58741e-06	5.64459e-05
AGAP4	42.8939	0.715141	0.271429	2.63473	0.00842041	0.0243661
ZNF425	57.1366	0.714098	0.25406	2.81075	0.0049426	0.0154244
ZMAT1	70.6528	0.713628	0.257996	2.76604	0.00567415	0.0174194
SOX5	113.823	0.713039	0.226826	3.14354	0.00166915	0.0060719
NUDT22	263.373	0.712753	0.191331	3.72524	0.000195131	0.000923616
CYTH3	290.37	0.712499	0.165419	4.30723	1.65312e-05	0.000102303
PLA2G12A	431.734	0.712164	0.151246	4.70866	2.49356e-06	1.8555e-05
PBLD	74.7637	0.712017	0.246848	2.88444	0.00392112	0.0126391
FAM161B	122.43	0.71174	0.212008	3.35714	0.000787528	0.00318242
SLC35F2	238.715	0.711174	0.173711	4.094	4.23994e-05	0.000238795
PLEKHM3	199.834	0.71103	0.182182	3.90285	9.50653e-05	0.000491044
KLLN	34.6608	0.710863	0.286918	2.47758	0.0132276	0.0355946
PPARD	219.451	0.710428	0.175514	4.04769	5.17247e-05	0.000285459
WDR45	219.03	0.710138	0.181828	3.90555	9.40126e-05	0.00048619
C9orf103	45.6828	0.709456	0.273248	2.59638	0.00942106	0.0268285
RAB3C	98.5544	0.709312	0.221206	3.20657	0.00134326	0.00502526
CPEB3	41.6824	0.70909	0.279021	2.54135	0.0110426	0.030701
FBXL16	58.681	0.708764	0.261886	2.70639	0.00680198	0.0203633
FBXO15	30.598	0.708242	0.291651	2.42839	0.0151659	0.0398871
MMP24	162.509	0.706928	0.194245	3.63937	0.000273309	0.00124524
FAM127A	357.466	0.706739	0.175665	4.02322	5.74066e-05	0.000314396
PACS1	107.831	0.706403	0.229426	3.079	0.00207698	0.00730424
ZBTB42	72.5508	0.706015	0.239817	2.94398	0.00324022	0.0107339
ADORA2A	43.2538	0.705749	0.276223	2.555	0.0106187	0.0297338
FAM134B	180.098	0.70568	0.185905	3.79593	0.000147093	0.000722749
ZDHHC1	93.285	0.704993	0.237468	2.96879	0.0029897	0.0100068
MPP3	215.633	0.704741	0.181344	3.88622	0.000101817	0.000521533
CHRFAM7A	67.9646	0.70462	0.248264	2.83819	0.00453701	0.0143097
FRRS1	218.081	0.703987	0.179211	3.92826	8.55633e-05	0.000448608
LINC00265	40.5101	0.703144	0.275692	2.55047	0.0107579	0.0300648
DALRD3	183.471	0.702827	0.19811	3.54765	0.000388682	0.00170352
LSR	67.7419	0.70257	0.250624	2.80328	0.0050585	0.0157466
SPEG	164.6	0.702116	0.219102	3.20451	0.00135292	0.00505404
GBA2	882.847	0.701207	0.139816	5.01523	5.29712e-07	4.64326e-06
SH3GL2	80.5602	0.701149	0.230701	3.03921	0.00237197	0.00819425
ADAM8	24.8551	0.70099	0.297008	2.36018	0.0182663	0.0465558
EPHA5	55.1985	0.700624	0.263051	2.66345	0.00773434	0.0226875
PRX	76.548	0.700558	0.257204	2.72374	0.00645467	0.0194681
TYK2	723.021	0.699965	0.142606	4.90837	9.18369e-07	7.57654e-06
ROM1	42.903	0.69996	0.276916	2.5277	0.0114813	0.0317566
CSDC2	48.8302	0.699279	0.264883	2.63995	0.00829171	0.0240639
RASEF	54.0774	0.699095	0.262237	2.66589	0.00767842	0.0225631
RNF103	270.21	0.698959	0.167574	4.17104	3.03216e-05	0.000177272
ITPRIPL2	781.979	0.698882	0.14293	4.8897	1.00991e-06	8.27885e-06
KIAA0195	1145.94	0.698228	0.144877	4.81945	1.43956e-06	1.13467e-05
DOCK6	136.198	0.698001	0.200175	3.48696	0.000488548	0.00209705
ABCA5	3435.3	0.697211	0.166739	4.18144	2.89666e-05	0.000169812
DNHD1	188.479	0.696844	0.190645	3.6552	0.000256985	0.00118129
CORO2B	43.6857	0.69683	0.283546	2.45756	0.0139885	0.0372691
KCNAB2	122.153	0.696694	0.211364	3.29618	0.000980093	0.00383333
CTSA	754.115	0.69665	0.140584	4.95541	7.21796e-07	6.09512e-06
USP20	285.081	0.696361	0.169067	4.11885	3.80772e-05	0.000217202
LTB4R	100.795	0.695694	0.225334	3.0874	0.00201919	0.0071458
FADS3	254.685	0.695314	0.192664	3.60894	0.000307449	0.00138079
CASP9	158.1	0.694627	0.194822	3.56544	0.000363241	0.0016051
NUCB2	291.816	0.694322	0.16952	4.0958	4.20708e-05	0.000237151
HOXD13	962.658	0.694122	0.131953	5.26037	1.43768e-07	1.39897e-06
CCDC165	417.063	0.694045	0.149763	4.63428	3.58186e-06	2.56903e-05
CHSY3	40.5938	0.693704	0.27679	2.50625	0.0122019	0.0333419
LASP1	500.556	0.693346	0.155314	4.46415	8.0389e-06	5.31383e-05
TMEM2	539.833	0.693337	0.156131	4.44074	8.96497e-06	5.86521e-05
PRR7	151.109	0.693177	0.2269	3.05499	0.00225068	0.00784244
MAP3K12	321.559	0.693131	0.166594	4.16059	3.17421e-05	0.00018499
FCHSD1	146.515	0.692949	0.216133	3.20613	0.00134533	0.00502862
C8orf44	34.7355	0.692939	0.28531	2.42872	0.0151521	0.0398762
LOC100128071	32.0263	0.69288	0.290712	2.38339	0.017154	0.0441176
OPRK1	38.1116	0.692879	0.281144	2.4645	0.0137203	0.0366831
FBXL8	32.9358	0.69285	0.292707	2.36704	0.0179308	0.0457721
RNPEP	1055.79	0.692447	0.137028	5.05332	4.34186e-07	3.87703e-06
ACER2	114.043	0.692442	0.212443	3.25942	0.00111639	0.00428457
PCDH10	76.6219	0.692148	0.242357	2.85591	0.0042914	0.0136653
RSPH3	97.5379	0.692019	0.225958	3.0626	0.00219427	0.00767279
STX1A	203.625	0.691954	0.176025	3.931	8.45937e-05	0.000444427
MST1	57.2319	0.690201	0.263615	2.61821	0.00883914	0.0254012
C11orf68	211.814	0.689447	0.194908	3.53729	0.000404252	0.00176576
SRSF8	1098.66	0.689235	0.124006	5.55806	2.7279e-08	3.02389e-07
MFAP4	1486.6	0.689063	0.146058	4.71772	2.38502e-06	1.78399e-05
MICALL1	485.774	0.688883	0.161361	4.2692	1.96176e-05	0.000119118
CRAT	128.535	0.687732	0.20951	3.28257	0.00102866	0.00399541
MTMR9LP	29.3304	0.687528	0.293112	2.34562	0.0189957	0.0481251
L1CAM	212.504	0.687219	0.194479	3.53365	0.000409863	0.00178906
GCC2	1839.58	0.687055	0.13756	4.99459	5.89605e-07	5.1024e-06
IDS	901.98	0.68647	0.138261	4.96503	6.86903e-07	5.83867e-06
CCS	259.291	0.68575	0.179915	3.81151	0.000138119	0.00068508
LYNX1	37.4328	0.685703	0.285381	2.40276	0.0162719	0.0423214
ZNF268	733.893	0.685668	0.154307	4.44354	8.84914e-06	5.79891e-05
PPFIBP1	622.795	0.685554	0.165021	4.15434	3.26233e-05	0.000189783
SLC2A12	76.6181	0.685546	0.241067	2.8438	0.00445788	0.0141084
NYNRIN	347.772	0.685404	0.15469	4.43083	9.38709e-06	6.11416e-05
ULBP2	130.704	0.685208	0.206065	3.3252	0.000883555	0.00350354
ARMC5	257.662	0.685036	0.192334	3.5617	0.000368458	0.00162482
ZNF846	60.8328	0.684889	0.254331	2.6929	0.00708335	0.0210737
CBFA2T2	777.826	0.684686	0.133282	5.13714	2.78947e-07	2.59125e-06
MOV10	411.843	0.684288	0.152134	4.49792	6.86223e-06	4.61644e-05
CLIP4	449.978	0.684043	0.15638	4.37424	1.21856e-05	7.76063e-05
MFAP2	74.3056	0.683907	0.244856	2.7931	0.00522061	0.0162082
HAGHL	129.455	0.68341	0.227783	3.00027	0.00269741	0.00914711
AHDC1	93.3816	0.683131	0.25363	2.69341	0.00707246	0.0210558
NECAB3	558.132	0.682968	0.148583	4.59656	4.29533e-06	3.01374e-05
PRKAB2	1681.49	0.681179	0.138819	4.90696	9.24996e-07	7.62634e-06
KIAA1522	123.895	0.679899	0.213072	3.19094	0.00141811	0.00526416
NCAN	86.5076	0.679449	0.230128	2.95248	0.00315228	0.0104722
ZNF446	88.521	0.679144	0.242525	2.80031	0.00510532	0.0158847
RASGRF2	124.588	0.679071	0.206805	3.28363	0.00102478	0.00398275
CYB5R1	731.766	0.678588	0.131128	5.175	2.27914e-07	2.14812e-06
TSPAN9	425.65	0.678513	0.152884	4.43808	9.07662e-06	5.9299e-05
EFHD1	100.13	0.678411	0.232376	2.91946	0.00350639	0.0114762
C3orf72	118.116	0.678235	0.217683	3.1157	0.00183509	0.00659376
RPRM	281.279	0.678001	0.197257	3.43715	0.000587867	0.00246035
NUDT8	39.1264	0.677764	0.288886	2.34613	0.0189695	0.0480684
ACTN2	78.015	0.677442	0.232784	2.91017	0.00361232	0.0117701
MKNK2	1156.43	0.677375	0.150409	4.50356	6.68254e-06	4.50731e-05
JAZF1	79.9887	0.676458	0.254037	2.66283	0.00774858	0.0227175
CIC	238.822	0.67605	0.187278	3.60987	0.00030635	0.00137633
IRF2BP2	1923.75	0.674344	0.120038	5.61774	1.93475e-08	2.18599e-07
SKIV2L	1036.55	0.674055	0.136614	4.93401	8.05571e-07	6.7378e-06
CASP6	222.068	0.673895	0.172574	3.90496	9.42422e-05	0.000487182
PLEKHH2	49.7125	0.672661	0.263286	2.55486	0.0106229	0.0297391
DGKH	106.166	0.672629	0.225956	2.97682	0.00291256	0.00978921
C1orf85	262.473	0.672077	0.176588	3.8059	0.000141289	0.000697686
GBE1	437.14	0.671677	0.149866	4.48186	7.3994e-06	4.94943e-05
SDC1	523.693	0.670918	0.162423	4.13069	3.61683e-05	0.000207598
SLC29A3	68.0232	0.670393	0.246334	2.72148	0.00649912	0.0195656
LOC646471	57.6725	0.670001	0.257212	2.60486	0.0091911	0.026249
SNX21	167.211	0.669619	0.197604	3.38869	0.000702278	0.00288766
HERC3	77.3047	0.669616	0.253189	2.64473	0.00817559	0.0237662
EMBP1	41.8568	0.668855	0.273122	2.44892	0.0143284	0.0379963
TBC1D8	793.59	0.6688	0.129474	5.1655	2.39793e-07	2.24858e-06
ARHGAP18	143.902	0.668632	0.205285	3.25708	0.00112563	0.00431235
OSBPL7	334.414	0.668515	0.16638	4.018	5.86936e-05	0.000320628
GATS	245.644	0.66831	0.174462	3.83069	0.000127784	0.000638104
MXRA8	481.603	0.667818	0.154757	4.31527	1.59409e-05	9.91257e-05
DYRK4	66.162	0.667712	0.256575	2.60241	0.00925711	0.0264199
ETV4	423.461	0.667447	0.160252	4.16498	3.11383e-05	0.000181635
C9orf4	50.5657	0.667442	0.263749	2.53059	0.0113869	0.0315359
MRAS	468.099	0.667081	0.141854	4.70259	2.56882e-06	1.90207e-05
ENC1	1602.09	0.666947	0.140559	4.74495	2.0856e-06	1.58952e-05
TIMP3	87.7928	0.666318	0.227133	2.9336	0.00335055	0.0110427
ZDHHC21	539.784	0.665732	0.177835	3.74354	0.000181448	0.000866216
LOC391322	37.4954	0.665103	0.280035	2.37507	0.0175457	0.0449725
GRIK5	94.3544	0.664964	0.229927	2.89207	0.00382719	0.0123796
FAM163A	46.5883	0.664766	0.279875	2.37522	0.0175383	0.0449716
SPARC	2947.29	0.664585	0.110635	6.00699	1.89004e-09	2.52456e-08
LINC00476	166.378	0.664433	0.200739	3.30993	0.000933186	0.00367212
PTCHD2	107.451	0.664366	0.222121	2.991	0.00278064	0.00939477
TMCC2	160.911	0.663652	0.201968	3.28592	0.00101651	0.00395419
ANKRD18B	113.711	0.663603	0.229796	2.88779	0.0038796	0.0125243
C10orf118	229.565	0.663535	0.206743	3.20947	0.00132978	0.00498205
TRIM68	67.7831	0.663311	0.245563	2.70119	0.00690924	0.0206413
PGM2L1	352.73	0.663187	0.178056	3.7246	0.000195625	0.000925276
CMTM8	71.0982	0.66299	0.246101	2.69398	0.00706048	0.021025
ADCK5	122.705	0.662266	0.228932	2.89285	0.00381763	0.0123518
CORO2A	250.38	0.662244	0.176142	3.75973	0.000170097	0.000820474
PQLC3	67.4283	0.662115	0.254742	2.59916	0.00934528	0.0266362
RHOB	868.874	0.661692	0.149964	4.41234	1.02259e-05	6.61046e-05
AGPHD1	43.9055	0.661419	0.275203	2.40338	0.0162441	0.0422577
MCAM	133.783	0.660653	0.211045	3.13038	0.00174578	0.00631683
RAMP1	129.091	0.66021	0.236607	2.79032	0.00526558	0.0163243
CACNA2D1	528.068	0.65997	0.166217	3.97053	7.1714e-05	0.000382682
CNTN4	148.723	0.659948	0.196654	3.35589	0.000791102	0.00319187
PGR	201.259	0.659712	0.200886	3.28401	0.00102343	0.0039787
SIX4	272.619	0.659608	0.167435	3.93948	8.16584e-05	0.000429706
ZNF75D	188.321	0.659322	0.192189	3.4306	0.000602244	0.00251156
ZNF672	437.253	0.658883	0.157532	4.18254	2.88276e-05	0.000169228
HCN1	58.8632	0.658728	0.25335	2.60007	0.00932037	0.0265769
PLEC	1199.92	0.658719	0.155591	4.23365	2.29926e-05	0.000137795
FOXD2	41.264	0.657653	0.276942	2.3747	0.0175634	0.045009
C14orf79	132.382	0.657478	0.213033	3.08627	0.00202687	0.0071671
CHST11	131.952	0.656221	0.202353	3.24296	0.00118294	0.00450211
ANKRD42	98.0071	0.65621	0.221183	2.96682	0.00300894	0.0100633
SEC31B	122.279	0.655951	0.212844	3.08184	0.00205725	0.00725067
STK10	503.438	0.655471	0.141321	4.63816	3.51523e-06	2.52545e-05
QRICH2	129.646	0.654906	0.200215	3.27102	0.00107161	0.00414106
SDCCAG8	271.961	0.654856	0.167643	3.90625	9.37382e-05	0.000485105
PORCN	84.495	0.654003	0.235032	2.78261	0.00539239	0.0166574
ZFYVE1	280.67	0.652765	0.170416	3.83043	0.00012792	0.00063827
CD276	735.276	0.652658	0.147381	4.42836	9.49526e-06	6.17527e-05
GOLGA8B	326.248	0.652286	0.160404	4.06653	4.77176e-05	0.000265159
NFATC4	1333.63	0.652035	0.134915	4.83293	1.34541e-06	1.06502e-05
PLCL2	484.22	0.651783	0.154971	4.20584	2.60114e-05	0.000153886
LIMA1	478.981	0.651335	0.150736	4.32102	1.55313e-05	9.67648e-05
PPP1R3E	131.81	0.650912	0.204299	3.18608	0.00144214	0.00533482
AHSA2	530.057	0.650888	0.142536	4.56649	4.95959e-06	3.43313e-05
NPTXR	97.6762	0.650873	0.234076	2.7806	0.00542586	0.0167488
C9orf3	586.573	0.650833	0.141886	4.58701	4.49629e-06	3.13937e-05
INSM2	289.332	0.650833	0.1975	3.29536	0.000982967	0.00384224
ATP2A3	46.0131	0.650616	0.270599	2.40435	0.0162011	0.0421883
NISCH	1898.85	0.649925	0.126614	5.13313	2.84964e-07	2.64144e-06
EPHB6	71.0986	0.649255	0.258004	2.51645	0.0118543	0.0325853
NTNG1	261.39	0.648987	0.167049	3.88501	0.000102325	0.000523721
ZDHHC24	173.881	0.648829	0.204955	3.16572	0.00154702	0.00567886
CADM4	156.8	0.648802	0.21255	3.05246	0.00226972	0.00789809
CALCOCO2	705.973	0.648536	0.131503	4.93174	8.15013e-07	6.78831e-06
RUSC2	314.346	0.648525	0.164391	3.94501	7.97952e-05	0.000420731
SYVN1	85.679	0.648384	0.239525	2.70695	0.00679035	0.0203332
KCNQ1OT1	467.133	0.648295	0.159305	4.06952	4.71097e-05	0.000262233
MDM2	4617.26	0.647785	0.154537	4.19178	2.7677e-05	0.000163291
SCN3B	251.082	0.647303	0.178732	3.62163	0.000292749	0.00132352
MADD	926.287	0.647214	0.129069	5.01448	5.31757e-07	4.65802e-06
LRRC2	70.2388	0.646999	0.254164	2.54559	0.0109092	0.0303954
ICA1L	91.3694	0.645174	0.231249	2.78996	0.00527149	0.0163387
RABGGTA	277.577	0.644576	0.186345	3.45905	0.000542093	0.00229482
PSME1	629.472	0.643865	0.136239	4.72601	2.28976e-06	1.72574e-05
PMP22	209.562	0.643522	0.175416	3.66854	0.000243938	0.00112658
YJEFN3	56.0773	0.643255	0.268211	2.39831	0.0164707	0.0427094
RNF152	125.636	0.642889	0.207981	3.0911	0.00199417	0.00707054
C1orf115	272.399	0.642246	0.185683	3.45882	0.000542539	0.00229596
FAM86HP	48.4674	0.641855	0.267402	2.40033	0.0163802	0.0425258
SEZ6L2	450.87	0.641849	0.174646	3.67514	0.000237715	0.00110213
GSTK1	656.331	0.641738	0.143674	4.46662	7.94666e-06	5.26094e-05
OS9	2439.38	0.641689	0.116908	5.48886	4.04542e-08	4.34246e-07
ETS2	740.632	0.641204	0.129277	4.95992	7.05212e-07	5.96288e-06
LOC100507043	193.031	0.640741	0.189207	3.38646	0.000708018	0.00290756
TACC2	82.8284	0.640711	0.234547	2.73169	0.00630099	0.0190715
ZNF75A	140.619	0.640435	0.200925	3.18743	0.00143545	0.00531618
NEIL2	314.439	0.640367	0.162934	3.93022	8.48666e-05	0.000445679
FBRS	111.867	0.640312	0.227453	2.81514	0.00487561	0.0152472
FBXL15	305.514	0.639978	0.195738	3.26956	0.00107715	0.00415996
SERPINE2	453.979	0.639574	0.147965	4.32248	1.54288e-05	9.61729e-05
ALDH5A1	387.271	0.639085	0.152243	4.19779	2.69532e-05	0.000159166
EFHC1	482.873	0.639045	0.163306	3.91317	9.10933e-05	0.00047356
SMPDL3A	153.417	0.638459	0.196037	3.25684	0.00112662	0.00431485
C14orf37	247.599	0.638355	0.191536	3.33281	0.000859724	0.00342377
SEPN1	347.074	0.638287	0.15576	4.09789	4.16927e-05	0.000235226
PRRT3	186.291	0.638075	0.192935	3.30721	0.000942319	0.00370242
CCNL2	2315.44	0.638056	0.111679	5.71329	1.10813e-08	1.31056e-07
YIPF3	692.031	0.637981	0.143083	4.45882	8.2413e-06	5.4337e-05
HERC2P2	495.631	0.637809	0.153567	4.15329	3.27732e-05	0.000190483
CSRNP1	501.944	0.636945	0.146276	4.35441	1.33428e-05	8.43105e-05
ST7-AS1	51.4679	0.636124	0.26639	2.38794	0.0169429	0.0436759
NRIP3	316.264	0.635976	0.162362	3.91702	8.96497e-05	0.000466808
ATAT1	162.793	0.63569	0.191201	3.32472	0.000885085	0.00350853
RSG1	48.1677	0.635254	0.270524	2.34824	0.0188626	0.0478494
LOC100506023	47.689	0.634904	0.269802	2.35322	0.0186114	0.0473209
CYP4V2	230.238	0.634845	0.175181	3.62395	0.000290143	0.00131359
CXXC4	108.449	0.634475	0.236204	2.68613	0.0072284	0.0214163
TOX	58.4023	0.634413	0.2594	2.44569	0.0144574	0.0382734
AP5B1	185.157	0.634375	0.192078	3.30269	0.000957607	0.00375448
HSF4	105.503	0.633812	0.221888	2.85645	0.0042841	0.0136522
RAP2B	55.3218	0.633758	0.264481	2.39623	0.0165647	0.042841
MAN1A1	2527.74	0.633142	0.144182	4.39128	1.12687e-05	7.23381e-05
ECE1	500.094	0.633135	0.152415	4.15402	3.26688e-05	0.000189962
IFNAR2	99.4405	0.632949	0.222796	2.84094	0.00449813	0.0142149
KIRREL2	111.373	0.632373	0.209916	3.01251	0.00259096	0.00883955
ATG16L2	123.859	0.632277	0.212332	2.97778	0.00290348	0.00976379
FGGY	146.347	0.63214	0.196669	3.21424	0.00130793	0.00491157
THBS3	1970.62	0.631854	0.128267	4.92608	8.38944e-07	6.96135e-06
DGKQ	182.366	0.631521	0.209817	3.00986	0.0026137	0.0089077
RABEP2	252.297	0.631488	0.171035	3.69216	0.000222355	0.00103584
GATM	657.743	0.63111	0.138979	4.54104	5.59761e-06	3.83773e-05
SEMA4B	100.295	0.631059	0.217816	2.89721	0.00376494	0.0122027
MANSC1	59.1789	0.630373	0.253881	2.48295	0.0130298	0.0351611
ULK1	227.4	0.63003	0.186418	3.37966	0.000725761	0.0029672
CD38	55.9783	0.629809	0.254916	2.47066	0.0134865	0.0361556
EPHA4	129.271	0.629781	0.204589	3.07828	0.00208199	0.00731787
FAM160B2	335.093	0.629733	0.160476	3.92416	8.70335e-05	0.000454837
VAMP1	104.259	0.629143	0.216407	2.90722	0.00364657	0.0118697
MPPED2	119.214	0.628895	0.208577	3.01517	0.00256838	0.00877642
IRAK4	153.998	0.628563	0.196855	3.19303	0.0014079	0.00523371
MAP3K6	199.98	0.628539	0.196171	3.20403	0.00135518	0.00505957
PHKA2	268.291	0.62841	0.165101	3.80623	0.000141104	0.000697306
AACS	470.017	0.628331	0.156297	4.02012	5.81694e-05	0.000318104
GABBR2	101.087	0.627867	0.218461	2.87404	0.00405258	0.0130043
C6orf192	268.404	0.627466	0.174104	3.60398	0.000313381	0.00140401
PAQR8	147.749	0.62665	0.196916	3.18233	0.00146097	0.00539678
SLC26A11	402.82	0.626205	0.155662	4.02285	5.74972e-05	0.000314758
LBH	443.968	0.62581	0.148984	4.20053	2.66293e-05	0.000157397
FLNC	1272.13	0.62577	0.149446	4.18726	2.82341e-05	0.000165895
PLXNB1	269.924	0.624395	0.188688	3.30914	0.000935841	0.00368145
FAM13C	78.648	0.62421	0.244765	2.55024	0.0107648	0.0300777
JAK1	2228.35	0.624005	0.128501	4.85605	1.19751e-06	9.6451e-06
PPP1R3D	51.8165	0.621822	0.26566	2.34067	0.0192493	0.0487102
UBE2QL1	65.4412	0.621664	0.247139	2.51544	0.0118883	0.032649
NCOA7	94.0504	0.62156	0.230289	2.69905	0.00695382	0.0207409
WWP1	277.574	0.621209	0.178842	3.4735	0.000513719	0.00218763
MBOAT7	494.036	0.620645	0.163189	3.80324	0.000142815	0.000703685
EPHA10	139.161	0.619262	0.219626	2.81962	0.00480811	0.0150727
CAMK4	477.714	0.618224	0.150705	4.1022	4.09241e-05	0.000231598
NMB	71.725	0.618159	0.242522	2.54888	0.0108071	0.0301631
PHF16	635.613	0.617579	0.148843	4.14921	3.33629e-05	0.000193214
LAMC1	3441.95	0.617151	0.122384	5.04272	4.58949e-07	4.07839e-06
IRS2	111.868	0.617113	0.221566	2.78523	0.00534895	0.0165311
NACC2	184.011	0.616406	0.183445	3.36017	0.000778941	0.00315563
CDK9	535.927	0.61618	0.149262	4.12818	3.65643e-05	0.000209684
NINJ1	149.258	0.6152	0.220857	2.78551	0.00534441	0.0165211
GDF11	394.783	0.615135	0.157571	3.90385	9.46759e-05	0.000489228
CYHR1	410.471	0.615037	0.16238	3.78763	0.000152089	0.000744747
CARD14	68.5301	0.614428	0.239714	2.56317	0.010372	0.0291454
IP6K2	946.105	0.614348	0.124866	4.92006	8.65159e-07	7.15916e-06
KREMEN2	108.246	0.614194	0.227928	2.69469	0.0070454	0.0209898
PPP2R5B	213.453	0.614034	0.178969	3.43095	0.000601477	0.00250917
LRRC7	65.9615	0.613627	0.250912	2.44559	0.0144616	0.0382742
CTSB	567.833	0.613562	0.142109	4.31756	1.57764e-05	9.81974e-05
AGL	1700.86	0.613477	0.259059	2.3681	0.0178799	0.045657
NUP62CL	115.763	0.613349	0.209793	2.92359	0.0034602	0.0113519
NKX2-5	189.527	0.613178	0.20701	2.96206	0.00305586	0.0102017
DLL3	2670.22	0.613146	0.168151	3.6464	0.000265944	0.00121684
CTDSP2	1251.18	0.612879	0.126415	4.84817	1.24607e-06	9.96162e-06
LIPE	64.8827	0.612621	0.259101	2.36441	0.0180588	0.0460772
CTSK	89.3047	0.612239	0.232507	2.63321	0.00845832	0.0244539
DFNA5	194.605	0.612193	0.181585	3.37138	0.000747915	0.00304139
IL17RD	272.589	0.612073	0.184214	3.32262	0.000891758	0.00352847
PODXL	269.114	0.611672	0.177191	3.45206	0.000556328	0.00234662
SLCO3A1	62.9856	0.610563	0.254412	2.3999	0.0163997	0.0425595
RELL2	145.955	0.610557	0.215021	2.83953	0.00451804	0.0142568
JUN	1263.03	0.610174	0.166459	3.66561	0.000246753	0.00113831
SPSB3	387.451	0.609973	0.17794	3.42797	0.000608124	0.00253444
TMEM56	1120.21	0.609918	0.187701	3.24941	0.00115644	0.00441073
EDEM1	524.675	0.60975	0.166781	3.65599	0.000256187	0.00117804
CTBS	160.805	0.609275	0.191641	3.17925	0.00147657	0.00544193
LOXL1	617.398	0.608735	0.175048	3.47753	0.000506061	0.00215858
KLF4	65.6928	0.608605	0.252206	2.41313	0.0158162	0.0413948
ZEB2	325.083	0.60844	0.168631	3.60812	0.000308421	0.00138422
VPS28	568.03	0.6083	0.149495	4.06903	4.72096e-05	0.000262676
EHHADH	73.1501	0.60787	0.242617	2.50547	0.0122288	0.0333996
RARG	143.795	0.607854	0.215871	2.81583	0.00486519	0.015222
ATP6AP1	541.84	0.607073	0.166544	3.64513	0.000267254	0.0012211
IRF1	67.4012	0.606921	0.248354	2.44377	0.0145345	0.0384459
TANC2	550.443	0.606795	0.149927	4.04727	5.18196e-05	0.000285861
GALNT12	62.6544	0.606031	0.251834	2.40647	0.0161074	0.0420205
RNF213	1812.92	0.604871	0.130843	4.62289	3.78435e-06	2.68885e-05
CD68	73.2415	0.604677	0.240391	2.51539	0.0118901	0.032649
SLC17A5	222.93	0.604243	0.175505	3.44289	0.000575531	0.0024142
ITPR2	923.249	0.60413	0.146504	4.12363	3.72944e-05	0.000213491
RPS6KA5	132.305	0.603848	0.207773	2.90629	0.00365745	0.0119022
WDR24	208.181	0.603654	0.20848	2.89549	0.00378564	0.0122575
DMXL2	1641.3	0.602834	0.151912	3.9683	7.23864e-05	0.000386111
TMEM134	111.869	0.602792	0.237308	2.54013	0.0110811	0.0307947
TMEM50B	259.06	0.602005	0.180887	3.32808	0.000874458	0.00347387
ZC3H7A	562.033	0.601446	0.158506	3.79446	0.000147964	0.000726201
ADAM19	184.083	0.601198	0.184129	3.26509	0.0010943	0.00421736
SOBP	98.7237	0.601039	0.22298	2.69548	0.00702869	0.0209497
LOC100505854	214.01	0.60063	0.175816	3.41624	0.000634917	0.00263334
RGNEF	935.374	0.599826	0.130488	4.59678	4.29063e-06	3.01208e-05
LOC344595	209.511	0.599809	0.181288	3.3086	0.000937634	0.00368738
GPAA1	845.875	0.599599	0.164183	3.65202	0.000260182	0.00119386
GARNL3	240.784	0.59844	0.176002	3.40018	0.000673418	0.00277971
TPRG1L	316.931	0.597686	0.161935	3.6909	0.000223465	0.00104055
TRPT1	276.334	0.597279	0.207958	2.87211	0.00407739	0.0130742
ACSS2	272.866	0.596344	0.177648	3.35689	0.000788254	0.00318325
SETDB2	177.842	0.595714	0.191948	3.10352	0.00191235	0.00682386
UGT8	231.732	0.595533	0.182193	3.2687	0.00108044	0.00417017
FAM176B	126.563	0.595449	0.237089	2.5115	0.0120219	0.032927
DCAF5	509.264	0.595425	0.146772	4.05681	4.97481e-05	0.00027573
PPAPDC1A	69.5135	0.594511	0.248074	2.39651	0.0165522	0.0428302
IL17RA	237.498	0.59424	0.179346	3.31338	0.000921767	0.00363162
DSEL	303.102	0.593332	0.172133	3.44693	0.000566987	0.00238378
AMOT	526.269	0.593105	0.168637	3.51705	0.000436373	0.00189261
CHPF2	557.456	0.592573	0.151619	3.90831	9.29423e-05	0.000481588
PNP	824.464	0.592072	0.13276	4.45971	8.20716e-06	5.41395e-05
COL6A2	495.61	0.591852	0.161682	3.66058	0.000251645	0.00115887
SLC18A3	178.64	0.591732	0.213275	2.77451	0.00552853	0.0170331
LONRF1	522.489	0.591026	0.1395	4.23675	2.26777e-05	0.000136098
C2CD2L	74.4374	0.589329	0.239675	2.45887	0.0139375	0.0371716
LOC729683	747.927	0.588415	0.170811	3.44484	0.000571396	0.00239841
POLR2A	713.282	0.588392	0.143172	4.10968	3.96201e-05	0.000224711
LOC100507053	142.796	0.588193	0.210989	2.78779	0.00530693	0.0164209
CDK20	173.328	0.587908	0.189313	3.10548	0.00189973	0.00678822
CAPRIN2	434.065	0.587494	0.152017	3.86466	0.000111242	0.00056355
SYTL4	495.112	0.58686	0.153531	3.82242	0.000132146	0.00065833
RMRP	121487	0.585926	0.176966	3.31096	0.000929763	0.00366089
SLC35A3	865.07	0.584707	0.150479	3.88564	0.00010206	0.000522571
RAMP2	116.452	0.58421	0.218543	2.67321	0.00751297	0.0221526
AP1S3	89.0439	0.583772	0.238055	2.45226	0.0141962	0.0377522
FBXO3	422.064	0.583586	0.154954	3.7662	0.000165753	0.000803121
PXN	216.62	0.582488	0.180147	3.23341	0.00122321	0.00462575
DAK	353.717	0.582392	0.17765	3.2783	0.00104434	0.00405267
IER5	818.545	0.582235	0.164457	3.54036	0.000399586	0.00174597
ELF1	146.354	0.5819	0.209838	2.7731	0.00555257	0.0170909
ARL17A	172.989	0.581139	0.200694	2.89565	0.0037838	0.0122563
ST6GALNAC2	144.617	0.580726	0.194383	2.98754	0.00281232	0.00948936
NHLH1	113.294	0.578549	0.215057	2.69021	0.00714065	0.0211953
MAP7D2	352.12	0.578116	0.157135	3.6791	0.000234056	0.00108634
TMEM63C	83.59	0.577171	0.235423	2.45163	0.014221	0.0377948
RPS6KA1	629.841	0.576959	0.148658	3.88112	0.000103977	0.000531039
HIVEP2	158.258	0.57668	0.197825	2.9151	0.00355578	0.0116192
PIAS3	409.115	0.576188	0.155498	3.70542	0.000211037	0.000990905
SNTB1	70.8437	0.575985	0.244264	2.35804	0.0183717	0.0467923
SERAC1	320.623	0.5758	0.161251	3.57084	0.000355844	0.00157512
POLM	168.659	0.574475	0.207421	2.76962	0.00561223	0.0172539
HCN3	252.895	0.57423	0.170446	3.36899	0.000754428	0.00306498
VAMP2	89.569	0.573988	0.224146	2.56077	0.0104439	0.0293079
CYB5D2	234.877	0.573036	0.185405	3.09072	0.0019967	0.00707591
GALNT6	288.471	0.572953	0.178469	3.21037	0.00132565	0.00496946
ERC2	81.4374	0.572634	0.232151	2.46664	0.0136386	0.0365027
LPCAT2	165.486	0.572085	0.212606	2.69082	0.00712763	0.0211712
NCOA4	2980.05	0.572063	0.129039	4.43325	9.28223e-06	6.05197e-05
MAPKAPK3	520.222	0.572006	0.147674	3.87343	0.000107316	0.000545586
ABCB6	1032.96	0.571531	0.139656	4.09243	4.26872e-05	0.000240083
FEV	143.07	0.571269	0.212146	2.69281	0.00708529	0.0210746
DOPEY2	195.571	0.570835	0.183384	3.11279	0.00185331	0.0066481
IGF2R	3320.24	0.569818	0.124286	4.58475	4.54532e-06	3.17189e-05
ACSS1	226.458	0.569806	0.171183	3.32863	0.000872752	0.00346816
PPOX	747.701	0.569549	0.142992	3.98308	6.80278e-05	0.00036543
MTHFR	387.968	0.569468	0.15501	3.67376	0.000239006	0.00110732
ANKH	212.47	0.569082	0.183078	3.10842	0.00188093	0.00673407
RWDD2A	117.556	0.568969	0.215302	2.64265	0.00822592	0.0238891
ZCCHC2	253.478	0.568858	0.179126	3.17574	0.00149454	0.00550343
RELN	1037.67	0.568842	0.135306	4.20412	2.62096e-05	0.000154987
DUSP14	411.687	0.568818	0.15793	3.60171	0.00031613	0.00141486
PSME2	824.472	0.568356	0.135121	4.20626	2.59629e-05	0.00015367
NBPF15	409.349	0.567736	0.151219	3.7544	0.000173758	0.000834077
THY1	131.987	0.5675	0.208475	2.72215	0.00648585	0.0195569
TMCC3	109.692	0.56735	0.221452	2.56196	0.0104083	0.0292207
SERINC3	694.782	0.56703	0.144429	3.92602	8.63622e-05	0.000452127
GSTM2	156.069	0.566181	0.197923	2.86062	0.00422818	0.0135074
RHOQ	721.12	0.566117	0.153213	3.69498	0.000219905	0.00102582
EIF2C4	631.3	0.566089	0.149593	3.7842	0.000154201	0.000753943
ITGA2	195.25	0.565952	0.186987	3.02668	0.00247253	0.00849784
RFX5	3525.45	0.565653	0.108965	5.19112	2.09029e-07	1.98463e-06
ATP6V0E2	396.319	0.565574	0.178695	3.16503	0.0015507	0.00569074
NCKAP5L	368.418	0.565197	0.170574	3.3135	0.000921363	0.00363114
ARRDC1	85.4142	0.56503	0.231085	2.44512	0.0144805	0.0383109
CACNB2	123.547	0.565006	0.220305	2.56465	0.010328	0.0290331
CYTH2	1046.86	0.564805	0.13557	4.16616	3.09775e-05	0.000180861
WSB1	1531.84	0.564139	0.143957	3.91882	8.89846e-05	0.000463532
ZNF692	411.577	0.563891	0.162105	3.47856	0.00050412	0.00215246
NCEH1	202.028	0.563483	0.180829	3.11611	0.00183253	0.00658795
DLGAP3	91.809	0.563423	0.237289	2.37442	0.0175767	0.0450253
LOC100506343	168.305	0.562888	0.192148	2.92945	0.00339559	0.0111683
NTPCR	790.131	0.562526	0.133483	4.21422	2.50641e-05	0.000148622
DBC1	153.133	0.562052	0.20327	2.76505	0.00569133	0.0174638
LNPEP	522.865	0.561719	0.162829	3.44974	0.000561135	0.0023638
CCDC144A	142.804	0.561647	0.22195	2.53051	0.0113897	0.0315367
AAK1	194.624	0.561639	0.184244	3.04835	0.00230102	0.00798551
TPRA1	492.72	0.561465	0.169958	3.30356	0.000954663	0.00374522
HSD17B4	1678.75	0.561112	0.130399	4.30304	1.68468e-05	0.000104057
KIAA1804	201.407	0.560971	0.17753	3.15986	0.00157845	0.00578601
C20orf194	380.362	0.56096	0.155044	3.61806	0.000296817	0.00134051
EPB41L3	583.356	0.559809	0.13862	4.03844	5.38079e-05	0.000296576
RAB11FIP5	196.579	0.559648	0.183428	3.05105	0.00228039	0.00793098
PIM1	358.066	0.559645	0.174535	3.20649	0.00134367	0.00502531
XPC	1939.38	0.559016	0.113339	4.93225	8.12889e-07	6.78003e-06
KLHL13	2553.5	0.558749	0.120823	4.62453	3.7544e-06	2.67937e-05
G6PD	391.95	0.558672	0.162991	3.42764	0.00060886	0.00253641
FAM109A	124.306	0.558148	0.211493	2.63909	0.00831286	0.0241144
RIMS2	217.162	0.557575	0.180226	3.09375	0.00197642	0.00701561
ATP2B2	94.7003	0.556033	0.22882	2.43	0.0150987	0.0397671
ZNF599	93.0998	0.555866	0.229721	2.41974	0.0155316	0.0407491
PCOLCE2	472.644	0.555505	0.140972	3.94053	8.13033e-05	0.000428012
PTPRO	317.128	0.555492	0.15733	3.53075	0.000414387	0.00180575
NEO1	1029.22	0.554817	0.133657	4.15106	3.30944e-05	0.000192004
FBXL2	277.677	0.554725	0.174475	3.1794	0.00147581	0.00544068
C8orf31	163.357	0.554247	0.192272	2.88261	0.00394392	0.0126955
SORBS1	103.328	0.554212	0.221803	2.49866	0.0124662	0.0339493
ATP6V0A1	1040.39	0.554152	0.126605	4.37702	1.20312e-05	7.67745e-05
OSCP1	216.877	0.553529	0.190619	2.90386	0.00368598	0.0119769
MSRB2	400.037	0.553213	0.159007	3.47918	0.000502953	0.00214959
TECPR2	306.9	0.553136	0.158537	3.489	0.000484839	0.00208252
MFSD10	530.53	0.55271	0.167574	3.2983	0.000972707	0.00380674
NLRX1	102.684	0.552564	0.222553	2.48284	0.0130338	0.0351611
CHMP1B	652.996	0.552268	0.133711	4.1303	3.62286e-05	0.000207852
EME2	91.0718	0.551258	0.234952	2.34626	0.018963	0.0480613
SLC50A1	502.202	0.551142	0.158795	3.47078	0.000518941	0.00220768
NXT2	171.19	0.551059	0.191681	2.87487	0.00404193	0.0129766
MARCH2	157.374	0.550471	0.207307	2.65534	0.0079228	0.0231337
MATN2	140.743	0.550422	0.204808	2.68751	0.00719876	0.0213394
C14orf167	86.4375	0.550095	0.22885	2.40374	0.0162284	0.0422253
CDK5RAP3	3624.04	0.549821	0.118002	4.65942	3.17096e-06	2.30118e-05
PICK1	313.027	0.549297	0.173248	3.17058	0.00152134	0.00559415
NBEAL1	409.654	0.548466	0.179023	3.06366	0.00218651	0.00764981
BBS1	289.977	0.548335	0.165916	3.3049	0.000950108	0.00373075
ZNF491	127.298	0.54827	0.206716	2.65228	0.00799493	0.0233131
[truncated: 567 more rows]

## Sheet: Be(2)-C_EPZ-6438
	baseMean	log2FoldChange	lfcSE	stat	pvalue	padj
EPAS1	147.884	1.4657	0.203835	7.19064	6.44885e-13	1.63207e-10
CHODL	191.685	1.42932	0.179623	7.95732	1.75804e-15	1.17086e-12
INHBE	87.3857	1.38311	0.216059	6.40153	1.53829e-10	2.18713e-08
ZNF641	125.021	1.38244	0.19081	7.2451	4.32112e-13	1.18868e-10
GABARAPL1	181.75	1.36718	0.187814	7.27944	3.35198e-13	9.42576e-11
ARHGAP36	170.221	1.366	0.183846	7.4301	1.08513e-13	3.52084e-11
PAK3	105.117	1.35784	0.198854	6.82832	8.59138e-12	1.62262e-09
NGFR	134.811	1.30137	0.202029	6.44149	1.18304e-10	1.73296e-08
PTPRH	220.85	1.28816	0.191896	6.71281	1.9091e-11	3.17866e-09
AASS	139.025	1.27838	0.189211	6.75637	1.41493e-11	2.43052e-09
SERPINE2	91.8153	1.27261	0.202001	6.29999	2.97672e-10	3.84361e-08
IGFBP3	360.676	1.26244	0.159021	7.93882	2.04106e-15	1.29138e-12
METRNL	84.7694	1.21268	0.207717	5.83817	5.27785e-09	4.83956e-07
ADAMTS2	160.207	1.20801	0.181913	6.6406	3.12406e-11	4.94149e-09
YES1	41.5559	1.202	0.221766	5.42011	5.95623e-08	4.05215e-06
ABCA5	45.0962	1.19613	0.222265	5.38153	7.38569e-08	4.91887e-06
CDH11	102.231	1.19178	0.199292	5.98005	2.23072e-09	2.29492e-07
TP53INP1	448.407	1.18847	0.152054	7.81615	5.44641e-15	2.65073e-12
FSTL1	202.347	1.18438	0.173674	6.81958	9.13098e-12	1.67454e-09
CDH6	166.453	1.18031	0.193966	6.08516	1.16372e-09	1.2805e-07
FAT1	100.713	1.17807	0.206829	5.69585	1.22757e-08	1.02872e-06
AGRN	368.498	1.15762	0.16907	6.84699	7.54182e-12	1.44597e-09
CACNA1H	246.361	1.13701	0.15864	7.16725	7.65209e-13	1.86211e-10
KIAA1324L	246.259	1.12921	0.164864	6.84933	7.41963e-12	1.44443e-09
FN1	415.32	1.12706	0.158971	7.08974	1.34368e-12	3.09145e-10
PGAM2	372.336	1.11477	0.147065	7.5801	3.45287e-14	1.32402e-11
ACCN4	435.368	1.11032	0.147822	7.51117	5.86e-14	2.05979e-11
SHC2	58.4696	1.10677	0.218857	5.05705	4.25791e-07	2.31243e-05
DLG2	165.269	1.10064	0.174992	6.28965	3.18187e-10	4.06701e-08
MECOM	94.051	1.09664	0.199516	5.49648	3.87446e-08	2.78565e-06
WNT6	101.897	1.09609	0.208329	5.26137	1.42987e-07	8.65721e-06
SNORA22	141.836	1.08723	0.183361	5.92946	3.03929e-09	3.07674e-07
IL13RA1	71.5105	1.08298	0.210936	5.13416	2.83414e-07	1.62277e-05
NUAK1	53.3189	1.07747	0.220326	4.89034	1.00659e-06	5.05454e-05
LRP1B	33.0922	1.07512	0.222906	4.82319	1.41281e-06	6.74631e-05
AHNAK	1494.12	1.0627	0.147645	7.19771	6.12316e-13	1.61151e-10
NEO1	61.7085	1.06114	0.21356	4.96884	6.7356e-07	3.48385e-05
RIMKLB	73.9934	1.05129	0.206955	5.0798	3.77833e-07	2.06974e-05
MIPOL1	43.8186	1.05039	0.222043	4.73056	2.23904e-06	9.97634e-05
SYT5	156.656	1.03987	0.193306	5.37943	7.47226e-08	4.95047e-06
SNORA63	2259.2	1.0358	0.151125	6.85393	7.18473e-12	1.42056e-09
PFKFB2	139.853	1.03157	0.19279	5.35074	8.75969e-08	5.62666e-06
ZNF467	38.5176	1.02893	0.222254	4.62952	3.66514e-06	0.000154596
FAM126A	110.976	1.02379	0.200013	5.11862	3.07781e-07	1.74716e-05
HLA-E	50.6767	1.02173	0.220415	4.6355	3.56079e-06	0.000150696
ATP9A	376.765	1.01129	0.142481	7.09774	1.26812e-12	2.97163e-10
ODF2L	59.6044	1.01125	0.213904	4.72759	2.27195e-06	0.000100522
CBLN4	165.421	1.00513	0.176659	5.68965	1.27299e-08	1.04982e-06
INSRR	98.6095	0.981764	0.201456	4.87333	1.0973e-06	5.38188e-05
HR	187.432	0.979147	0.188167	5.20362	1.95449e-07	1.1557e-05
HLA-C	410.197	0.974077	0.146149	6.66495	2.64748e-11	4.29503e-09
IGFBP7	830.489	0.973524	0.134548	7.23551	4.63775e-13	1.24864e-10
MIAT	635.715	0.953774	0.139044	6.85951	6.90964e-12	1.38785e-09
SLITRK6	283.286	0.950497	0.164187	5.78911	7.07593e-09	6.1328e-07
HMOX1	147.438	0.948691	0.2163	4.38601	1.15451e-05	0.000408077
DCX	898.183	0.948397	0.155272	6.10796	1.00912e-09	1.1504e-07
CADM4	89.0434	0.945406	0.201334	4.69572	2.6567e-06	0.000116325
ZNF334	77.1827	0.942881	0.207618	4.54143	5.5875e-06	0.000220888
SNORD15B	1482.09	0.941071	0.133824	7.03218	2.03328e-12	4.43606e-10
DCLK1	324.557	0.933132	0.158661	5.88129	4.07093e-09	3.88025e-07
RNF182	57.9974	0.926403	0.217662	4.25615	2.07981e-05	0.000687151
REST	44.1196	0.918907	0.221235	4.15354	3.27374e-05	0.000991051
CADPS	1249.61	0.910215	0.113683	8.00659	1.17936e-15	8.29088e-13
PCDH7	77.2326	0.910153	0.201859	4.50885	6.51785e-06	0.000252223
ARHGEF2	346.569	0.902293	0.185333	4.86849	1.12456e-06	5.49428e-05
NRXN1	224.316	0.901342	0.159828	5.63947	1.70578e-08	1.36613e-06
C17orf28	51.7882	0.895782	0.218387	4.10182	4.09913e-05	0.00120349
GSN	55.3137	0.894185	0.218417	4.09393	4.24121e-05	0.00123872
SLC7A11	526.903	0.892125	0.220398	4.0478	5.17023e-05	0.00145387
ACBD7	113.621	0.889972	0.197841	4.49843	6.8457e-06	0.000261708
SNORA24	376.198	0.889966	0.167191	5.32304	1.02046e-07	6.4243e-06
STC2	600.379	0.889721	0.169336	5.25418	1.48681e-07	8.95912e-06
WIPI1	97.7454	0.888222	0.202551	4.38517	1.15897e-05	0.000408514
DUSP9	46.9941	0.887522	0.221125	4.01367	5.97808e-05	0.00164807
TMEFF2	84.9924	0.887235	0.202235	4.38715	1.14848e-05	0.000407084
KDM5B	1294.57	0.883385	0.12391	7.12926	1.00908e-12	2.40923e-10
SAMD5	35.9786	0.879146	0.222832	3.94534	7.96883e-05	0.00204125
CXCL12	36.615	0.876975	0.222618	3.93936	8.16984e-05	0.0020801
NTRK1	691.514	0.875406	0.129951	6.73644	1.6231e-11	2.7385e-09
ENPP4	57.5551	0.87462	0.218548	4.00196	6.28192e-05	0.00169854
MYO1E	38.8444	0.873788	0.22286	3.92079	8.82587e-05	0.00221154
PLAG1	54.5153	0.871032	0.219294	3.97198	7.12767e-05	0.00185529
MCF2L	718.572	0.863236	0.127053	6.79428	1.08859e-11	1.91319e-09
RET	1928.25	0.860071	0.147177	5.84377	5.10311e-09	4.71348e-07
OPTN	144.186	0.857907	0.184776	4.64296	3.43456e-06	0.000145842
YPEL2	394.989	0.856383	0.147157	5.81952	5.90179e-09	5.29655e-07
SNORA4	431.886	0.855255	0.157286	5.43759	5.40057e-08	3.71407e-06
SNORA67	173.05	0.850578	0.186956	4.54961	5.37457e-06	0.000214542
EXOC6B	68.5395	0.846393	0.211304	4.00558	6.18662e-05	0.00168719
ADCY6	339.824	0.84524	0.148641	5.68646	1.297e-08	1.05249e-06
PLXNA2	668.107	0.845019	0.156045	5.41524	6.12068e-08	4.14177e-06
MYO6	34.049	0.844637	0.222998	3.78764	0.000152082	0.00348001
PI15	56.9659	0.841523	0.21925	3.83819	0.000123943	0.00292062
SPOCK1	107.38	0.841496	0.202475	4.15605	3.23791e-05	0.000982555
FUT1	50.4811	0.840639	0.22279	3.77323	0.000161147	0.00360913
SYT3	37.3258	0.833577	0.222591	3.74488	0.000180479	0.0039718
SCN9A	341.863	0.832377	0.150471	5.53183	3.16906e-08	2.33147e-06
JPH3	81.9619	0.831306	0.210039	3.95787	7.56202e-05	0.00195285
WASF3	133.942	0.829963	0.180592	4.59579	4.31111e-06	0.000177696
DHX32	103.363	0.829752	0.199513	4.15888	3.19809e-05	0.000977294
NR3C1	60.6858	0.828094	0.215727	3.83863	0.000123723	0.00292062
NAV2	48.1366	0.826813	0.222402	3.71766	0.000201078	0.00432728
DTWD2	90.1826	0.826033	0.196988	4.19331	2.74911e-05	0.000850544
SNORA27	128.85	0.825856	0.207803	3.97424	7.06054e-05	0.00184977
STAC2	24.3048	0.825192	0.219704	3.75593	0.0001727	0.00382053
CACNA1B	211.582	0.824402	0.179701	4.58763	4.48302e-06	0.000183586
DGKB	223.155	0.82232	0.167863	4.89876	9.64453e-07	4.86223e-05
SIPA1L2	238.257	0.818181	0.165421	4.94606	7.57294e-07	3.89545e-05
C1orf114	50.1826	0.81708	0.218929	3.73218	0.000189832	0.00412738
GUCY1A2	53.6694	0.814609	0.217134	3.75164	0.000175679	0.00387289
FAM184A	104.084	0.811473	0.198425	4.08956	4.32184e-05	0.00125145
TMEM59L	88.2048	0.804645	0.213673	3.76579	0.000166026	0.00368577
RNU11	158.616	0.803859	0.189586	4.24007	2.23447e-05	0.000725123
MYH15	198.342	0.800974	0.171275	4.67654	2.91755e-06	0.000126434
PIK3IP1	480.131	0.799695	0.13565	5.89528	3.74049e-09	3.64093e-07
SNORA48	296.414	0.799167	0.169379	4.71823	2.3791e-06	0.000104532
ZFYVE28	45.3879	0.795545	0.219627	3.62225	0.000292053	0.00574749
LOC100134229	104.389	0.795418	0.196128	4.05561	5.00034e-05	0.00141237
PDZD2	172.513	0.793005	0.193376	4.10084	4.11645e-05	0.00120578
SCN3A	276.071	0.79132	0.166338	4.75729	1.96209e-06	8.93105e-05
ENPP2	1864.24	0.790407	0.120856	6.54009	6.14803e-11	9.37316e-09
ACP6	58.4409	0.789966	0.219299	3.60223	0.000315497	0.00608582
CPXM1	66.5645	0.78597	0.215393	3.64901	0.000263255	0.00530824
RPL23P8	103.568	0.785816	0.196415	4.0008	6.3129e-05	0.00170176
HOMER3	58.5584	0.78443	0.21508	3.64716	0.00026516	0.00533439
ADCY5	73.2328	0.781572	0.206992	3.77586	0.000159459	0.00358401
MFAP3L	55.2904	0.781412	0.215155	3.63186	0.00028139	0.00555493
TNFRSF10B	83.8526	0.776914	0.213669	3.63606	0.00027684	0.00549295
SLC9A3	60.3445	0.776195	0.216354	3.58762	0.000333708	0.00635
PARP14	93.3595	0.77569	0.200413	3.87047	0.000108627	0.00260829
SIAE	185.813	0.773518	0.171639	4.50665	6.58605e-06	0.000254085
LINC00277	135.599	0.773481	0.183062	4.22524	2.38686e-05	0.000762691
CERS4	34.5055	0.77164	0.223007	3.46016	0.000539846	0.00928154
CALCB	46.7054	0.769672	0.221201	3.47952	0.000502313	0.00877938
BDKRB2	41.4123	0.768831	0.222385	3.4572	0.00054582	0.00937131
SDSL	74.0284	0.765791	0.210224	3.64274	0.000269756	0.00537557
PRDM8	54.4853	0.764797	0.216693	3.5294	0.000416505	0.00762729
CYFIP2	232.161	0.762794	0.166354	4.58537	4.53181e-06	0.000184391
C5orf41	191.166	0.762288	0.179296	4.25155	2.12292e-05	0.000697751
SSTR2	307.982	0.761925	0.15185	5.01763	5.23131e-07	2.78138e-05
TGFB1	49.2374	0.758517	0.22309	3.40004	0.000673753	0.0109024
C8orf42	126.844	0.757251	0.186693	4.05612	4.98939e-05	0.00141237
MYC	24.9076	0.755541	0.220297	3.42964	0.000604374	0.0101071
STC1	135.971	0.752571	0.189905	3.96288	7.40506e-05	0.0019199
PTPN21	97.67	0.751771	0.199136	3.77516	0.000159906	0.00358768
MB21D2	58.02	0.751617	0.214065	3.51116	0.000446149	0.0080536
SNORA8	350.572	0.751229	0.171043	4.39205	1.12289e-05	0.000399129
LRP1	130.844	0.750261	0.208479	3.59873	0.000319773	0.00614113
B3GNT5	43.1232	0.749745	0.220419	3.40145	0.000670288	0.010866
CNTN5	82.7693	0.749334	0.205526	3.64593	0.000266428	0.00533508
WDR86	41.9404	0.748334	0.222351	3.36555	0.000763923	0.011861
CCNG2	360.831	0.748238	0.156953	4.76727	1.86739e-06	8.56157e-05
SH3PXD2A	446.341	0.748058	0.156841	4.76952	1.84663e-06	8.49718e-05
AK4	49.9819	0.747933	0.218126	3.42891	0.00060602	0.0101071
SH3KBP1	130.438	0.745025	0.195916	3.80278	0.000143082	0.00330394
ZNF697	318.189	0.744947	0.152519	4.88429	1.03801e-06	5.16463e-05
IGFBP5	1477.24	0.744553	0.134591	5.53195	3.16686e-08	2.33147e-06
GOLGA8B	152.84	0.743511	0.186053	3.99624	6.43554e-05	0.00172899
APH1B	164.136	0.74299	0.182865	4.06305	4.84352e-05	0.00138352
KCNA3	84.7477	0.742982	0.215252	3.45168	0.000557118	0.00951386
BRSK2	117.18	0.742711	0.192723	3.85377	0.000116311	0.00277698
DSE	157.747	0.740149	0.182747	4.05012	5.11909e-05	0.00144269
JHDM1D	656.088	0.739073	0.143714	5.14268	2.7085e-07	1.55788e-05
KCNQ2	518.313	0.737986	0.140705	5.24491	1.56362e-07	9.37729e-06
FLNC	711.654	0.736975	0.167416	4.40207	1.07224e-05	0.000384367
C14orf132	3243.52	0.736822	0.115858	6.35971	2.02132e-10	2.81075e-08
GOLGB1	1373.5	0.734835	0.116283	6.3194	2.62586e-10	3.49765e-08
KIF13A	48.8925	0.734401	0.218896	3.35502	0.000793582	0.0121869
GOLGA8A	308.6	0.732134	0.165276	4.42978	9.43304e-06	0.000346993
PAIP2B	71.1441	0.731357	0.214576	3.40838	0.000653491	0.0106885
PRKCA	629.767	0.726662	0.135462	5.36431	8.1259e-08	5.27308e-06
SNORA10	147.345	0.725868	0.190677	3.80678	0.000140786	0.00326283
CNTNAP3	115.98	0.725179	0.19714	3.67849	0.000234616	0.00489099
VLDLR	221.216	0.724204	0.166234	4.35652	1.32144e-05	0.00046249
CALCOCO1	329.28	0.723347	0.155529	4.65089	3.30513e-06	0.000142019
FNDC5	364.951	0.722353	0.145385	4.96856	6.74524e-07	3.48385e-05
RPL13AP20	61.1783	0.721952	0.213413	3.38289	0.000717272	0.0113454
SNORD89	46.3374	0.720514	0.221855	3.24768	0.0011635	0.0166549
SEMA3E	244.14	0.7202	0.162645	4.42804	9.50941e-06	0.000348788
HOTAIR	286.078	0.719104	0.163478	4.39879	1.08854e-05	0.000388951
SLC2A13	43.901	0.717885	0.221131	3.24643	0.00116864	0.0166907
BCL2	890.894	0.717854	0.12459	5.76172	8.32619e-09	7.11889e-07
CLSTN3	212.825	0.716085	0.183715	3.89781	9.70661e-05	0.0023943
NTNG2	57.7396	0.715743	0.218577	3.27456	0.00105826	0.0154992
TNIK	398.192	0.715429	0.14059	5.08876	3.60407e-07	2.00907e-05
LRRC4B	71.2219	0.714065	0.211617	3.37433	0.000739952	0.011599
HOOK1	80.1376	0.712256	0.211485	3.36788	0.000757472	0.0117897
SLAIN1	230.654	0.711573	0.168516	4.22257	2.41529e-05	0.000765991
TEP1	113.738	0.708819	0.192965	3.67329	0.000239444	0.00493473
ITGA6	204.527	0.708673	0.172421	4.11012	3.95453e-05	0.00116373
ADCYAP1R1	842.807	0.708517	0.133749	5.29736	1.17492e-07	7.28793e-06
FAM214A	312.978	0.706155	0.164438	4.29435	1.75206e-05	0.000592797
LTBP4	247.035	0.705574	0.177439	3.97643	6.99577e-05	0.00183924
DAAM1	163.975	0.705152	0.173789	4.05752	4.95974e-05	0.00140719
EIF4E3	192.7	0.703961	0.17025	4.13487	3.55157e-05	0.00106497
SYT17	69.4193	0.703456	0.208413	3.37529	0.000737367	0.0115909
KCNK10	36.2822	0.702699	0.222244	3.16183	0.00156779	0.020861
PGM2L1	262.495	0.702302	0.160743	4.36909	1.24766e-05	0.000438553
HOMEZ	141.506	0.701862	0.187074	3.75178	0.000175585	0.00387289
PTPRM	54.5213	0.699586	0.216936	3.22485	0.00126038	0.0177493
SATB1	295.541	0.699012	0.161141	4.33789	1.43855e-05	0.000496007
TRIM58	24.9349	0.696281	0.220272	3.16101	0.00157222	0.020898
FMNL2	281.324	0.696082	0.155383	4.47978	7.47207e-06	0.000282928
PELI2	298	0.695718	0.156578	4.44328	8.8597e-06	0.00032877
PLEKHA6	957.639	0.695439	0.135867	5.11852	3.07936e-07	1.74716e-05
MARCH4	115.092	0.694371	0.190517	3.64467	0.00026773	0.00535207
FAM20A	28.1206	0.693458	0.222711	3.11372	0.00184747	0.0234013
DGKK	90.1771	0.693322	0.203295	3.41042	0.000648618	0.0106454
KCTD12	979.038	0.692237	0.130391	5.30895	1.10256e-07	6.87281e-06
NOTCH2	33.7032	0.691773	0.223035	3.10164	0.00192452	0.0240879
BOK	94.7757	0.691715	0.202968	3.40799	0.000654429	0.0106885
SEMA6D	148.946	0.691055	0.18281	3.78018	0.000156712	0.00353483
SNORA20	47.7268	0.690403	0.220608	3.12955	0.00175073	0.0225991
PGPEP1	52.1362	0.688284	0.217625	3.16271	0.00156308	0.0208202
AGPAT4	375.099	0.68354	0.144381	4.7343	2.19816e-06	9.88424e-05
ZNF793	209.927	0.683431	0.175559	3.89288	9.90601e-05	0.00242928
KIAA0125	408.581	0.682723	0.150399	4.53941	5.64108e-06	0.000221684
RAB31	370.24	0.679136	0.149561	4.54087	5.60238e-06	0.000220888
SIX4	87.8612	0.678892	0.199597	3.40131	0.000670648	0.010866
DNAH2	126.404	0.67576	0.185325	3.64636	0.000265981	0.00533508
MMP15	350.047	0.674893	0.172885	3.9037	9.47314e-05	0.00235971
AHRR	29.3404	0.673787	0.223035	3.02099	0.00251953	0.0294115
PLA2G12A	329.443	0.672558	0.14853	4.52811	5.95143e-06	0.000232436
SNORA80B	324.333	0.671659	0.159041	4.22319	2.40869e-05	0.000765818
FIG4	119.833	0.670622	0.195373	3.43251	0.000598014	0.0100519
EGFLAM	53.3718	0.670414	0.219937	3.04821	0.00230206	0.0274436
SLC25A27	27.2153	0.669656	0.222552	3.00899	0.0026212	0.0301808
NEGR1	38.6115	0.669421	0.221852	3.01742	0.00254933	0.0295957
PCYT1B	71.051	0.668395	0.20909	3.19668	0.00139017	0.0191001
SGSM1	285.288	0.666937	0.158813	4.19951	2.67489e-05	0.000831647
ANKRD6	44.0415	0.665317	0.220916	3.01164	0.00259843	0.0300279
TGFBR1	1624.68	0.663874	0.124531	5.33097	9.76869e-08	6.24308e-06
NTNG1	268.452	0.663769	0.158932	4.17643	2.96119e-05	0.000909488
ANKRD33B	103.381	0.663677	0.198267	3.34738	0.000815781	0.0124223
PLEKHA2	138.519	0.663012	0.181198	3.65904	0.00025316	0.00513515
GPRASP1	81.1766	0.662629	0.203083	3.26284	0.00110301	0.0160154
CHGB	11131.6	0.662338	0.104461	6.34052	2.28995e-10	3.11581e-08
SNORA70	538.364	0.662082	0.165323	4.00478	6.20758e-05	0.00168926
C20orf194	398.24	0.661919	0.149132	4.43846	9.0603e-06	0.000335231
FZD5	94.8442	0.660173	0.205604	3.21089	0.00132324	0.0184598
NBR2	63.1142	0.660131	0.21288	3.10096	0.00192896	0.0241196
ATF5	184.908	0.659478	0.190042	3.47018	0.000520114	0.00902639
SLC26A1	26.7486	0.65943	0.22229	2.96653	0.00301182	0.0329115
SH3BGRL2	284.311	0.658336	0.15391	4.27739	1.89095e-05	0.000629685
C22orf23	82.879	0.657571	0.209731	3.13531	0.00171674	0.0223548
FILIP1L	70.8997	0.657301	0.209476	3.13783	0.00170201	0.0222034
DLL1	33.9927	0.657172	0.222886	2.94847	0.00319356	0.0343633
CD59	425.109	0.657005	0.142759	4.6022	4.18053e-06	0.000172877
TMEM45A	33.5003	0.656697	0.222964	2.9453	0.00322637	0.0345987
CYTL1	39.7288	0.656498	0.221128	2.96886	0.00298905	0.0327476
DUSP6	76.6584	0.65633	0.211158	3.10824	0.00188204	0.0237677
STXBP5	1587.31	0.656131	0.11446	5.73243	9.90036e-09	8.35194e-07
PLIN5	58.18	0.655286	0.215148	3.04574	0.00232107	0.0275567
C6orf192	231.844	0.655263	0.164426	3.98515	6.74374e-05	0.00178526
RAB3B	54.1706	0.654685	0.219007	2.98933	0.00279588	0.0314201
TSPAN5	38.4821	0.652641	0.221961	2.94034	0.00327852	0.0350688
SEL1L	1192.01	0.650724	0.119223	5.45803	4.81438e-08	3.38451e-06
SPAG6	34.2601	0.650195	0.222867	2.91741	0.00352947	0.0369412
DYRK1B	279.675	0.64879	0.190225	3.41065	0.000648083	0.0106454
NIPSNAP3A	338.323	0.648398	0.155946	4.15783	3.21285e-05	0.000977294
PPP1R3C	158.149	0.647288	0.181384	3.5686	0.000358894	0.00674806
RPL13AP6	55.6118	0.647221	0.214954	3.01097	0.00260412	0.0300388
ZNF836	72.185	0.645799	0.208766	3.09342	0.00197865	0.0244749
RUFY3	2291.42	0.642566	0.122073	5.26378	1.4112e-07	8.58524e-06
ABAT	823.026	0.642184	0.123727	5.19031	2.09944e-07	1.23565e-05
MCTP2	49.2609	0.641793	0.220826	2.90633	0.00365701	0.0378689
PON2	84.9584	0.641386	0.204573	3.13524	0.00171716	0.0223548
CCDC80	124.584	0.640224	0.189149	3.38476	0.000712415	0.0112969
GPR176	86.6227	0.639721	0.206466	3.09844	0.00194545	0.0241339
HIPK2	258.897	0.63895	0.184531	3.46256	0.000535064	0.00922439
EPPK1	44.4679	0.638679	0.220141	2.90123	0.00371705	0.0383338
SEPT14	1011.14	0.638242	0.140074	4.55647	5.20212e-06	0.000208315
PVRL2	255.541	0.636537	0.173167	3.67585	0.000237055	0.00491135
MCART6	71.6177	0.635932	0.208654	3.04778	0.00230541	0.0274436
LOC149837	123.34	0.634189	0.186575	3.39911	0.000676047	0.0109193
ACTA2	124.619	0.633769	0.206637	3.06707	0.00216171	0.0262257
ROBO2	345.233	0.633636	0.153841	4.11878	3.80889e-05	0.00112875
IDUA	31.2352	0.633576	0.222968	2.84156	0.00448932	0.0436312
IRF6	230.489	0.632858	0.170993	3.70107	0.000214694	0.00456577
PCGF5	217.1	0.632578	0.163269	3.87445	0.000106866	0.00257577
SMOX	52.721	0.632006	0.221583	2.85223	0.00434139	0.0426607
CD24	1877.33	0.631783	0.108645	5.81512	6.059e-09	5.39934e-07
SESN3	931.002	0.63136	0.139041	4.54083	5.60338e-06	0.000220888
DEPTOR	773.963	0.630554	0.122607	5.14287	2.70567e-07	1.55788e-05
MOCS1	86.9591	0.630297	0.200527	3.1432	0.00167111	0.0218906
AKR1C3	321.58	0.630026	0.163933	3.84319	0.000121447	0.0028779
SCARNA1	51.8586	0.629379	0.221278	2.84429	0.00445108	0.0434426
LOC388849	108.889	0.628296	0.197909	3.17467	0.00150009	0.0202731
AKAP9	1756.95	0.628125	0.130416	4.81632	1.46229e-06	6.90439e-05
ZNF578	102.945	0.627852	0.192586	3.26011	0.00111369	0.0161242
ALDH1A3	107.031	0.624874	0.197488	3.16411	0.00155557	0.0207803
ELAVL2	214.626	0.624728	0.174821	3.57352	0.000352213	0.00664218
EPHA10	24.4946	0.623073	0.221513	2.8128	0.00491123	0.0464822
PPM1K	77.0789	0.621311	0.208029	2.98666	0.00282044	0.0315864
TCP11L2	36.6164	0.620813	0.223045	2.78336	0.00537995	0.0495435
NRXN2	68.3594	0.620063	0.209287	2.96274	0.00304914	0.0331476
CNTNAP2	183.162	0.619405	0.16922	3.66034	0.000251878	0.00512421
DDIT4	1025.82	0.61908	0.146198	4.23454	2.29018e-05	0.000739284
TOM1L2	134.625	0.618486	0.185644	3.33157	0.000863578	0.0130558
FBN1	333.884	0.616458	0.160133	3.84966	0.00011828	0.00280809
MCF2L2	102.089	0.616433	0.197577	3.11996	0.00180877	0.0231427
PCDHB19P	61.257	0.615103	0.217414	2.82918	0.00466672	0.0448388
C7orf58	46.8236	0.614614	0.220085	2.79262	0.00522828	0.0485019
KIF13B	190.869	0.614332	0.165664	3.70829	0.000208661	0.00446013
PLCL1	200.276	0.613261	0.165323	3.70947	0.000207691	0.00444691
PLEKHH1	104.993	0.613081	0.199249	3.07696	0.00209122	0.0254445
SAMD11	1383.8	0.612933	0.120906	5.06952	3.98824e-07	2.17531e-05
AACSP1	179.674	0.612448	0.17477	3.50431	0.000457794	0.00820528
SNORA49	84.8597	0.610439	0.20622	2.96013	0.00307505	0.0333434
SLC1A4	168.726	0.610304	0.185181	3.29572	0.00098171	0.0145976
KLHL24	1712.93	0.608097	0.138258	4.39827	1.09118e-05	0.000388951
ARSD	226.93	0.607492	0.166623	3.6459	0.000266459	0.00533508
EFNB3	89.1195	0.607463	0.19996	3.03792	0.0023822	0.028146
PLXNA3	204.289	0.606883	0.194817	3.11515	0.00183852	0.0233112
CHRFAM7A	68.3846	0.606859	0.207845	2.91977	0.00350291	0.0367849
LOC642852	415.546	0.606517	0.149463	4.05798	4.95e-05	0.00140719
SNORA71A	262.317	0.605772	0.169198	3.58026	0.000343251	0.00649252
CRISPLD2	55.2079	0.605477	0.217605	2.78246	0.00539484	0.0495762
GPR22	487.042	0.605353	0.156171	3.87621	0.000106096	0.002567
ABCG1	237.426	0.60506	0.163584	3.69876	0.000216654	0.00458452
ECI2	75.8259	0.604722	0.208607	2.89886	0.00374517	0.0384511
LPPR3	65.4757	0.603722	0.210487	2.86822	0.00412789	0.0413246
STMN4	135.47	0.603188	0.185781	3.24676	0.00116726	0.0166899
SLC35F1	128.007	0.602196	0.188321	3.19771	0.00138523	0.0190737
AUTS2	172.015	0.599716	0.177742	3.37408	0.000740636	0.011599
ZNF525	87.0993	0.59893	0.203097	2.94898	0.00318826	0.0343633
PCNXL2	368.871	0.598717	0.148852	4.02222	5.76531e-05	0.00159289
SNORA28	118.314	0.597284	0.192025	3.11045	0.00186803	0.0236144
PLXNA4	1674.76	0.597046	0.149694	3.98843	6.65111e-05	0.00176813
PTH2R	107.335	0.596386	0.198794	3.00002	0.00269966	0.0307961
SNORA7B	69.2484	0.59475	0.209837	2.83433	0.00459212	0.0443578
HS6ST3	374.003	0.593686	0.14948	3.97168	7.13667e-05	0.00185529
POLD4	121.904	0.593229	0.201008	2.95127	0.00316474	0.0341694
FAM160A1	71.4523	0.592845	0.212098	2.79515	0.00518756	0.0482672
UBE2QL1	295.58	0.591035	0.165758	3.56566	0.000362946	0.00679094
KIF5A	207.463	0.59032	0.179862	3.28207	0.00103047	0.0151976
BMF	164.841	0.589946	0.18425	3.20188	0.00136532	0.0188405
TDRD7	89.9716	0.58956	0.205893	2.86343	0.00419075	0.04167
CEBPA	106.206	0.588431	0.200241	2.93862	0.0032968	0.0351587
SORCS2	73.955	0.58761	0.211369	2.78001	0.00543568	0.0498291
RASSF8	186.498	0.586108	0.172696	3.39387	0.000689116	0.0110381
BTN2A2	77.9793	0.585852	0.205046	2.85717	0.00427436	0.0422231
GPR155	317.153	0.584028	0.150692	3.87565	0.00010634	0.00256798
SLC12A6	202.704	0.584002	0.169001	3.45561	0.000549057	0.00940157
BBC3	242.838	0.583814	0.172115	3.39199	0.000693862	0.011086
EVI5L	187.759	0.583118	0.172264	3.38503	0.000711705	0.0112969
C4orf34	114.126	0.582887	0.191288	3.04717	0.00231005	0.0274731
CPT1A	611.285	0.582221	0.127412	4.5696	4.88652e-06	0.000198186
B4GALNT4	205.862	0.582098	0.169313	3.438	0.000586028	0.0099139
PRKCZ	260.598	0.581853	0.155657	3.73804	0.000185462	0.00404626
SESN2	321.595	0.579167	0.176513	3.28116	0.00103383	0.0152294
SNORA68	271.905	0.577708	0.178722	3.23244	0.0012274	0.017373
NINL	230.509	0.574987	0.173966	3.30517	0.000949188	0.0141473
CD55	175.31	0.573344	0.179027	3.20257	0.00136209	0.0188165
ADAMTS7	307.58	0.573173	0.176388	3.2495	0.00115609	0.0166334
DFNA5	88.2225	0.57073	0.202456	2.81903	0.00481691	0.0458295
DPYSL4	290.31	0.567976	0.174798	3.24934	0.00115674	0.0166334
RAB11FIP4	354.607	0.567652	0.154567	3.67253	0.000240161	0.00494145
RCN1	546.688	0.567543	0.147064	3.85917	0.000113773	0.00272667
UBE2H	1178.26	0.5672	0.122121	4.64457	3.40781e-06	0.000145648
ADAMTSL2	209.271	0.566894	0.170085	3.333	0.000859147	0.0130044
C7orf41	991.494	0.560993	0.121809	4.6055	4.1147e-06	0.000170713
PPARGC1A	211.502	0.560968	0.164162	3.41717	0.000632754	0.0104392
PTPRB	231.275	0.560384	0.16341	3.42932	0.000605091	0.0101071
GPC2	200.37	0.559797	0.171576	3.26268	0.00110364	0.0160154
PTGER3	219.683	0.55952	0.175162	3.1943	0.00140171	0.0192063
DCHS1	187.792	0.557674	0.193332	2.88454	0.00391985	0.0396814
FAM134B	229.286	0.556614	0.170513	3.26435	0.00109716	0.0159763
LTB4R	122.052	0.555986	0.19551	2.84377	0.00445829	0.0434453
ARNT2	303.743	0.555748	0.172586	3.22013	0.00128134	0.0179833
LARP6	134.318	0.555645	0.194815	2.85216	0.00434227	0.0426607
KCNT2	511.684	0.554691	0.146553	3.78491	0.000153764	0.00350196
SLC6A17	120.818	0.553915	0.19667	2.81647	0.00485541	0.0461264
CLSTN2	579.176	0.553271	0.151234	3.65838	0.000253815	0.00513883
LPP	117.057	0.551784	0.189093	2.91805	0.00352224	0.0368961
FGF14	525.529	0.550797	0.141144	3.90238	9.52525e-05	0.00236338
GRK5	422.349	0.550781	0.136117	4.0464	5.20124e-05	0.00145934
C14orf101	260.866	0.549901	0.156212	3.52023	0.000431169	0.00786008
PRKACB	823.631	0.549356	0.139661	3.9335	8.37183e-05	0.00212725
PRKAB2	472.434	0.549215	0.139819	3.92803	8.56446e-05	0.00216317
SIPA1L1	452.894	0.548261	0.14957	3.66558	0.000246774	0.00505885
STK32C	97.4524	0.548169	0.195971	2.79719	0.0051549	0.0480955
MBNL2	682.307	0.547166	0.136011	4.02296	5.74705e-05	0.00159132
RIC3	133.694	0.546814	0.185605	2.94612	0.00321786	0.0345368
CHURC1	325.011	0.546624	0.155332	3.51908	0.00043305	0.0078733
TSPYL2	506.745	0.546624	0.132353	4.13005	3.62681e-05	0.0010824
IGF2R	1275.89	0.546174	0.133441	4.093	4.25828e-05	0.00123872
FGD4	226.588	0.546118	0.160674	3.39892	0.000676523	0.0109193
SNORA80	138.323	0.545493	0.190679	2.86079	0.00422581	0.0419011
ST8SIA4	325.669	0.54518	0.152805	3.56781	0.000359972	0.00675829
CUX2	185.682	0.544544	0.191162	2.84859	0.00439132	0.0430424
GABBR1	104.129	0.544202	0.192572	2.82597	0.00471376	0.0450854
LRRN2	234.187	0.544053	0.179448	3.03181	0.00243092	0.0285648
CCDC112	348.173	0.544022	0.156014	3.487	0.000488467	0.00860871
ZMAT4	434.133	0.543657	0.144174	3.77083	0.000162706	0.00363604
AHCYL2	216.544	0.541289	0.167857	3.22471	0.00126099	0.0177493
ATP11A	368.465	0.540984	0.163242	3.31401	0.000919693	0.0137725
QSOX1	277.939	0.539899	0.161265	3.3479	0.000814254	0.0124139
NFASC	251.879	0.53948	0.170256	3.16864	0.00153154	0.0205081
KCNMA1	112.017	0.53877	0.189274	2.84651	0.00442015	0.0432246
KIAA0513	145.531	0.535005	0.188799	2.83373	0.00460077	0.0443987
MLYCD	137.759	0.534844	0.186024	2.87514	0.00403846	0.0406222
SH3BGRL	243.023	0.534313	0.166634	3.2065	0.00134359	0.0186498
SERINC1	2723.06	0.533942	0.122789	4.34845	1.37102e-05	0.000477155
TJP1	521.373	0.53394	0.13593	3.92806	8.56334e-05	0.00216317
MIR600HG	142.961	0.533914	0.17796	3.00019	0.00269812	0.0307961
MEG3	3101.51	0.533176	0.123513	4.31675	1.5834e-05	0.000538613
CCPG1	123.276	0.532803	0.188828	2.82163	0.00477796	0.0454931
HSPA4L	210.816	0.529549	0.161521	3.27851	0.00104356	0.0153192
IRS2	299.168	0.526662	0.17921	2.9388	0.00329481	0.0351587
CCDC113	146.377	0.526642	0.178842	2.94474	0.00323229	0.0346329
TMEM170B	348.959	0.526261	0.151811	3.46656	0.000527164	0.00911303
NIPAL3	155.317	0.525802	0.183104	2.8716	0.00408399	0.0410476
LINC00176	397.015	0.524618	0.144016	3.64277	0.000269719	0.00537557
RABEP2	158.285	0.523549	0.177942	2.94225	0.00325833	0.0348823
SESN1	378.963	0.521699	0.14453	3.60963	0.000306633	0.00595113
ZNF528	314.287	0.521283	0.147687	3.52965	0.00041611	0.00762729
LONRF2	563.149	0.520988	0.132083	3.94441	7.99982e-05	0.00204505
EDNRA	853.87	0.520753	0.141085	3.69106	0.000223322	0.00469421
TLE3	445.18	0.520375	0.176608	2.94649	0.003214	0.0345246
ZNF208	405.616	0.520263	0.148975	3.49229	0.000478892	0.00848726
ALDH1L2	480.412	0.519606	0.170133	3.05411	0.00225726	0.0271049
VEGFA	1577.13	0.518922	0.116705	4.44645	8.72995e-06	0.000326831
NCKAP5L	314.898	0.518812	0.177296	2.92624	0.00343084	0.0361782
SNORD10	712.612	0.518689	0.161748	3.20677	0.00134235	0.0186498
STAT2	192.216	0.517207	0.171129	3.02232	0.00250846	0.0293535
SUSD5	171.891	0.517153	0.173995	2.97223	0.00295642	0.0325026
ANTXR2	501.57	0.516837	0.133236	3.8791	0.000104843	0.00254641
SNORA6	308.257	0.516798	0.180289	2.86649	0.00415052	0.0413695
VCAN	864.818	0.516549	0.125149	4.12748	3.66768e-05	0.00109202
SCUBE1	202.407	0.516322	0.182972	2.82186	0.00477457	0.0454931
C6orf170	240.176	0.51511	0.172854	2.98004	0.00288213	0.0319909
MAOA	218.703	0.514239	0.177544	2.89641	0.00377464	0.0386298
ZNF621	435.587	0.513531	0.147959	3.47077	0.000518959	0.00902048
FAM214B	166.647	0.513139	0.17499	2.93238	0.0033637	0.0357019
TAP2	304.099	0.511281	0.1456	3.51155	0.000445499	0.00805334
SYBU	617.218	0.507746	0.129322	3.92622	8.62913e-05	0.00217516
TRIM36	179.588	0.507103	0.181389	2.79566	0.00517941	0.0482268
ZNF780B	605.588	0.506653	0.142304	3.56037	0.000370339	0.00689158
KDM3A	352.741	0.506263	0.152441	3.32105	0.000896808	0.0134852
EHHADH	155.717	0.505691	0.180666	2.79904	0.0051254	0.0479002
ITPRIPL2	270.249	0.504723	0.150737	3.34837	0.000812873	0.0124078
TUFT1	192.753	0.50322	0.165767	3.0357	0.00239979	0.028301
HGF	861.478	0.50301	0.135826	3.70335	0.000212773	0.00453271
SNORD97	675.811	0.50246	0.157584	3.18852	0.00143001	0.0195203
ZNF808	178.457	0.50231	0.173235	2.8996	0.00373643	0.0384397
ZDBF2	1418.28	0.501662	0.126079	3.97894	6.92229e-05	0.00182489
TSPYL1	1515.69	0.500612	0.111134	4.5046	6.64993e-06	0.000254995
KIAA1671	226.772	0.499136	0.174069	2.86747	0.00413772	0.0413695
RYR2	266.675	0.49902	0.160973	3.10003	0.00193502	0.0241339
PCMTD1	539.346	0.498074	0.138312	3.60108	0.000316899	0.00610357
AP1G2	229.636	0.497945	0.170588	2.91899	0.00351171	0.0368162
CXADR	317.696	0.49556	0.162554	3.04859	0.00229916	0.0274436
KLHL5	575.495	0.494585	0.131172	3.7705	0.000162924	0.00363604
LOC100132163	290.654	0.494441	0.152954	3.23261	0.00122665	0.017373
DOCK5	147.467	0.493354	0.176814	2.79024	0.00526687	0.0487623
MAPT	478.095	0.493094	0.153802	3.20603	0.0013458	0.0186526
GULP1	449.04	0.492136	0.141041	3.48932	0.000484254	0.00854637
YPEL5	486.574	0.49212	0.134497	3.65897	0.000253227	0.00513515
CPT1C	217.663	0.492083	0.171395	2.87105	0.00409108	0.0410535
KLF9	343.012	0.491975	0.147002	3.34672	0.000817725	0.0124369
BTG2	518.387	0.490731	0.132123	3.7142	0.00020385	0.00437207
ZSCAN30	166.695	0.48987	0.17149	2.85655	0.00428278	0.0422403
PLK2	863.012	0.48786	0.121879	4.00282	6.25927e-05	0.0016965
PCDHAC1	299.371	0.486445	0.161786	3.00672	0.00264083	0.030324
SH3TC1	300.241	0.481307	0.156011	3.08509	0.0020349	0.0249271
KIAA1467	268.772	0.480972	0.162085	2.96741	0.00300315	0.0328452
CADM2	429.457	0.480761	0.14589	3.29536	0.000982954	0.0145989
ZNF841	287.07	0.48015	0.151408	3.17123	0.00151794	0.0204123
ANKS1A	218.438	0.478592	0.166001	2.88306	0.00393827	0.0397725
PTPRK	490.692	0.478541	0.131685	3.63399	0.000279073	0.0055178
SYNE1	381.436	0.478108	0.149683	3.19415	0.00140245	0.0192063
ZDHHC21	360.776	0.47787	0.158142	3.02177	0.00251298	0.0293622
NAP1L3	270.631	0.477445	0.15986	2.98664	0.00282064	0.0315864
CNGB1	616.597	0.477271	0.148221	3.22	0.00128188	0.0179833
NT5E	2038.89	0.476886	0.113216	4.21218	2.52922e-05	0.000796138
C10orf32	271.482	0.47668	0.153	3.11554	0.00183606	0.0233035
ENC1	2364.83	0.476436	0.114004	4.17913	2.92625e-05	0.000900944
FAM117B	338.136	0.476236	0.163647	2.91014	0.00361268	0.0376254
PCDHA11	201.49	0.475477	0.16909	2.81198	0.00492381	0.0465398
SORL1	645.331	0.475276	0.135344	3.51161	0.000445404	0.00805334
DNAJC10	954.093	0.472726	0.121613	3.88712	0.00010144	0.00247805
AHNAK2	284.372	0.472489	0.164785	2.8673	0.00413988	0.0413695
GOLGA2	585.129	0.472235	0.128038	3.68824	0.00022581	0.0047308
RNU12	454.77	0.470983	0.158663	2.96844	0.00299314	0.032764
RALGAPA2	327.978	0.470862	0.154035	3.05686	0.00223668	0.0269552
SCG5	1035.75	0.46958	0.120225	3.90585	9.38952e-05	0.00234349
PCLO	355.788	0.468141	0.150239	3.11597	0.00183342	0.0232933
LOC100506548	1938.13	0.467962	0.111146	4.21034	2.54982e-05	0.000800631
EPS15	541.716	0.46781	0.127732	3.66244	0.000249824	0.00509061
KIFAP3	539.892	0.467564	0.130373	3.58635	0.000335336	0.00637138
TSC22D3	468.408	0.467528	0.161544	2.89411	0.0038023	0.0387394
LOC100505678	376.19	0.466409	0.153013	3.04817	0.00230239	0.0274436
PNMA2	766.98	0.463902	0.118986	3.89878	9.66773e-05	0.00239202
ARHGAP26	207.442	0.463367	0.1654	2.80149	0.00508676	0.0476799
LCOR	518.147	0.46326	0.140763	3.29107	0.000998061	0.0147886
TSPAN8	698.372	0.462837	0.148	3.12728	0.00176432	0.0226753
PLEKHM3	281.855	0.461185	0.161878	2.84897	0.00438615	0.0430424
MGC21881	218.783	0.459441	0.162344	2.83004	0.00465415	0.044786
SERPINH1	802.031	0.458864	0.150406	3.05084	0.00228202	0.0273195
EFHA2	424.201	0.458242	0.161062	2.84513	0.00443939	0.0433792
EXOC1	795.864	0.458128	0.129358	3.54154	0.000397794	0.00733774
TRIM44	384.527	0.457259	0.145389	3.14506	0.0016605	0.0217967
PLCXD3	326.966	0.456215	0.15108	3.01969	0.00253032	0.029456
GNPTAB	363.015	0.456199	0.149976	3.04181	0.00235162	0.0278888
DBT	423.466	0.454577	0.143304	3.17211	0.00151333	0.0203721
ALS2	721.429	0.454391	0.130372	3.48533	0.000491524	0.00862655
LOC647979	6358.47	0.454187	0.110484	4.1109	3.94114e-05	0.0011625
VPS13C	2638.03	0.452396	0.127652	3.54396	0.000394159	0.00728129
EPB41L3	314.59	0.450943	0.151693	2.97273	0.0029516	0.0325012
ADCY1	644.511	0.450146	0.150571	2.98958	0.00279357	0.0314201
NEAT1	344.862	0.449668	0.152959	2.93979	0.00328437	0.0351017
C20orf112	361.045	0.448803	0.15695	2.85954	0.00424261	0.0420078
SENP7	616.289	0.446673	0.141405	3.15883	0.00158406	0.0209892
SLC6A15	1684.44	0.445619	0.120865	3.68693	0.000226977	0.00474739
BEX2	512.731	0.443678	0.159601	2.77992	0.00543722	0.0498291
GOLGA4	879.286	0.442179	0.120343	3.67433	0.000238471	0.00493034
DST	2941.79	0.441309	0.122035	3.61624	0.000298909	0.00585309
ANKRD12	315.08	0.441238	0.153782	2.86924	0.00411461	0.0412243
CBL	436.785	0.44086	0.136458	3.23073	0.00123473	0.0174378
SPOCK3	1262.43	0.439792	0.130338	3.37425	0.000740162	0.011599
FAM120B	311.416	0.438815	0.147189	2.98131	0.0028702	0.0319269
CPEB4	728.826	0.438367	0.129086	3.39594	0.000683936	0.0109861
HEY1	386.968	0.437689	0.141607	3.09087	0.0019957	0.0246376
ZNF783	330.411	0.435503	0.149799	2.90726	0.00364615	0.0378494
BBX	1416.14	0.433339	0.119182	3.63596	0.000276948	0.00549295
LPPR4	738.709	0.433013	0.125739	3.44375	0.000573698	0.00977062
SDCBP	472.295	0.432976	0.13836	3.12934	0.00175199	0.0225991
KIF1A	2328.87	0.42869	0.135122	3.17261	0.00151074	0.0203588
DNAJB9	563.278	0.425023	0.152619	2.78486	0.00535511	0.0493904
NKTR	619.306	0.424983	0.136066	3.12335	0.00178805	0.022924
CPVL	428.845	0.424647	0.142077	2.98884	0.00280038	0.0314428
MYO5A	917.517	0.42455	0.124365	3.41375	0.000640745	0.0105435
ZNF529	457.004	0.423088	0.135289	3.12728	0.00176433	0.0226753
RABGAP1L	464.894	0.422849	0.145886	2.89849	0.0037497	0.0384511
GLCE	1874.47	0.420655	0.124834	3.3697	0.000752493	0.0117267
SLC16A9	364.166	0.419384	0.146306	2.86648	0.00415062	0.0413695
ARMCX3	828.676	0.419228	0.124619	3.36407	0.000768007	0.0119098
PIK3R1	1628.7	0.418952	0.111935	3.74281	0.00018197	0.00399073
LRP12	445.576	0.418297	0.14592	2.86662	0.00414879	0.0413695
FOSL2	710.23	0.418189	0.122711	3.40791	0.000654622	0.0106885
MALAT1	17717.9	0.417897	0.133469	3.13105	0.00174185	0.0225602
RPS6KA2	637.839	0.417262	0.1389	3.00405	0.00266413	0.0305085
MAGI2-AS3	678.149	0.417062	0.140261	2.97347	0.00294455	0.0324851
GFPT1	490.913	0.416762	0.134472	3.09926	0.00194007	0.0241339
COG3	509.475	0.416102	0.137226	3.03224	0.00242748	0.0285648
DYNC2H1	1130.65	0.415609	0.140256	2.96321	0.0030445	0.0331256
IGSF3	1071.43	0.415441	0.122324	3.39623	0.000683203	0.0109861
SPIN3	535.027	0.41394	0.130543	3.17091	0.0015196	0.020413
ASTN2	1181.4	0.411569	0.147584	2.78872	0.00529168	0.048948
LSAMP	790.531	0.410894	0.136974	2.9998	0.00270161	0.0307961
IRGQ	1125.9	0.4106	0.125927	3.26062	0.00111168	0.0161137
CEP290	416.999	0.409136	0.14557	2.81058	0.00494524	0.0466541
SMARCA1	1019.19	0.407803	0.11608	3.51312	0.000442872	0.0080288
JMY	775.894	0.403828	0.123557	3.26835	0.00108176	0.0158066
WSB1	447.4	0.4032	0.141764	2.84417	0.00445275	0.0434426
PDIA2	1303.87	0.400029	0.123298	3.24442	0.00117689	0.0167518
DPP6	562.149	0.397979	0.138991	2.86334	0.00419202	0.04167
PRNP	1026.59	0.396822	0.117286	3.38337	0.000716019	0.0113398
PAM	1189.44	0.396585	0.119665	3.31412	0.000919334	0.0137725
KDM4A	525.702	0.396377	0.133345	2.97257	0.00295318	0.0325012
SCARNA16	940.392	0.39631	0.139427	2.84242	0.00447731	0.0435479
TSHZ2	635.461	0.395326	0.136578	2.89451	0.00379757	0.0387223
PDE4DIP	961.316	0.395301	0.117891	3.35311	0.000799103	0.0122419
LOC286467	880.789	0.394083	0.127606	3.08829	0.00201313	0.0247803
SECISBP2L	497.958	0.392408	0.137779	2.8481	0.00439805	0.043075
C1orf9	1168.03	0.390421	0.12049	3.24028	0.00119412	0.016978
MAGED2	5191.4	0.388942	0.108525	3.58389	0.000338513	0.0064125
AGL	747.516	0.388256	0.134993	2.87613	0.00402586	0.0405599
CLDN12	697.572	0.385848	0.12514	3.08334	0.00204689	0.0250013
FRY	814.287	0.384957	0.132747	2.89994	0.00373239	0.0384397
TFDP2	1268.02	0.384394	0.121825	3.1553	0.00160333	0.0212002
WDR26	558.535	0.383677	0.131205	2.92426	0.00345279	0.0363189
MLLT4	1211.33	0.383463	0.12704	3.01844	0.00254083	0.0295346
PARM1	888.787	0.382385	0.124686	3.06679	0.00216372	0.0262257
KCNT1	1461.4	0.382168	0.124971	3.05805	0.00222783	0.0268741
ZNF33B	841.127	0.381463	0.128052	2.97896	0.00289228	0.032048
FAM115A	1925.96	0.379836	0.107142	3.54518	0.000392351	0.00725849
ITPR1	2775.87	0.376749	0.110732	3.40235	0.000668082	0.0108523
ZKSCAN1	1089.28	0.376281	0.118068	3.18699	0.00143759	0.019568
JARID2	650.754	0.375402	0.125457	2.99228	0.00276904	0.0313132
MTMR3	739.15	0.374422	0.123785	3.02479	0.00248807	0.0291734
UNC79	1103.43	0.373697	0.125813	2.97026	0.00297552	0.0326275
SPTBN2	2066.06	0.373184	0.118689	3.14422	0.0016653	0.021837
MYO9A	685.711	0.373003	0.133858	2.78657	0.00532698	0.0491668
FAN1	692.351	0.372723	0.124333	2.99778	0.00271953	0.030919
ATRX	2441.73	0.370537	0.120067	3.08607	0.0020282	0.024869
VPS13A	1770.63	0.369179	0.124483	2.9657	0.00301992	0.0329602
PDCD4	1260.95	0.364892	0.117721	3.09963	0.00193762	0.0241339
VPS41	1185.77	0.364668	0.122131	2.98588	0.00282762	0.0316049
SORCS1	1168.55	0.364488	0.114199	3.19169	0.00141442	0.0193284
RYBP	1198.37	0.364304	0.114072	3.19364	0.00140492	0.0192193
KCNAB1	714.958	0.363243	0.127244	2.85469	0.00430791	0.042422
CEP164	529.185	0.36291	0.128472	2.82481	0.0047308	0.0452134
DCAF8	1142.63	0.362677	0.119911	3.02457	0.00248991	0.0291734
GAS5	4321.7	0.362564	0.121145	2.99282	0.00276417	0.0312861
HERC2P2	1174.02	0.362157	0.118543	3.05508	0.00225001	0.0270643
STRA6	3383.94	0.361157	0.111109	3.25046	0.00115219	0.0166057
PTPRR	1682.86	0.356958	0.114446	3.11901	0.0018146	0.0231938
LAMC1	2585.27	0.353387	0.112358	3.14519	0.00165979	0.0217967
APPBP2	1026.24	0.350104	0.124606	2.80968	0.00495914	0.0466565
ATRN	1078.01	0.34968	0.125458	2.78723	0.00531606	0.0491337
CDK6	5990.78	0.348716	0.124866	2.79271	0.00522679	0.0485019
EPB41L4A-AS1	883.442	0.347774	0.12514	2.77907	0.00545146	0.0499152
KALRN	1032.85	0.347353	0.124393	2.79239	0.00523195	0.0485019
NFE2L1	3124.59	0.346818	0.106183	3.26623	0.00108988	0.015907
ATP2B1	1394.37	0.345107	0.12175	2.83456	0.00458894	0.0443578
SLC31A1	3444.15	0.344557	0.102064	3.3759	0.000735755	0.0115799
ITGB5	878.101	0.343709	0.122992	2.79455	0.00519718	0.0483211
CALD1	1333	0.335828	0.114635	2.92953	0.00339474	0.0359051
CCND1	14020.3	0.334262	0.10718	3.11869	0.00181659	0.0231959
FLNA	8269.44	0.333701	0.11892	2.80611	0.00501436	0.047071
CLASP2	1531.19	0.333692	0.118252	2.82186	0.00477455	0.0454931
MXD4	1626.06	0.333651	0.110481	3.01997	0.00252797	0.029456
PPP3CA	1167.49	0.32895	0.109988	2.99079	0.00278253	0.0313816
KIDINS220	3765.12	0.321246	0.112842	2.84686	0.00441522	0.0432097
PSAP	8331.16	0.308429	0.109216	2.82404	0.00474228	0.0452555
CHGA	32589.8	0.303694	0.102017	2.9769	0.00291183	0.0322083
SOX4	4576.46	0.297443	0.103388	2.87696	0.00401527	0.0404854
TSC22D1	1944.05	0.296595	0.106299	2.79019	0.00526774	0.0487623

## Sheet: Be(2)-C_DAC
	baseMean	log2FoldChange	lfcSE	stat	pvalue	padj
H19	586.526	4.67829	0.171361	27.3008	4.15168e-164	5.25354e-160
DCAF4L1	166.046	3.48745	0.197422	17.6649	7.81378e-70	4.94378e-66
ACRC	54.2003	1.95845	0.21765	8.99816	2.29525e-19	1.81525e-16
HIST1H1T	159.914	1.64664	0.177546	9.27449	1.78473e-20	1.61314e-17
AHNAK	1494.12	1.39554	0.147241	9.47796	2.59299e-21	3.28118e-18
PLEKHG4	153.033	1.34435	0.178164	7.54559	4.50242e-14	2.03477e-11
KRT19	112.487	1.27863	0.197921	6.46031	1.04489e-10	2.7546e-08
NGFR	134.811	1.25402	0.201965	6.20909	5.32934e-10	1.2724e-07
NNAT	52.4045	1.25336	0.217999	5.74938	8.95693e-09	1.64262e-06
HOTAIR	286.078	1.24421	0.161254	7.71586	1.20167e-14	6.08238e-12
FSIP2	39.6112	1.23567	0.222499	5.55362	2.79814e-08	4.65891e-06
TPM2	92.5122	1.23316	0.200981	6.13573	8.47715e-10	1.91553e-07
ENTPD3	119.385	1.18621	0.195259	6.07507	1.2393e-09	2.70381e-07
TOM1L1	89.5175	1.1487	0.199175	5.7673	8.05506e-09	1.51428e-06
EXOC3L1	95.2145	1.11538	0.196552	5.67471	1.38927e-08	2.40819e-06
BMF	164.841	1.11497	0.18107	6.15767	7.38207e-10	1.72986e-07
MYO18B	62.0435	1.10826	0.214213	5.17365	2.29562e-07	3.02591e-05
NXT2	181.296	1.08989	0.179631	6.06739	1.30008e-09	2.78834e-07
SERPINF1	836.788	1.07028	0.128192	8.34905	6.88161e-17	4.14666e-14
TP53INP1	448.407	1.06681	0.152235	7.00762	2.424e-12	9.29492e-10
HR	187.432	1.0288	0.187751	5.47961	4.26266e-08	6.74246e-06
PCDHGA12	26.1079	1.02228	0.221994	4.60499	4.12486e-06	0.000341032
ENC1	2364.83	1.0219	0.113341	9.01611	1.94893e-19	1.64412e-16
IRF6	230.489	1.01523	0.168957	6.00879	1.86911e-09	3.87733e-07
PCDHGA11	45.5739	1.01222	0.22139	4.5721	4.8286e-06	0.000372567
NTNG1	268.452	1.01166	0.157202	6.43542	1.23134e-10	3.17988e-08
MIAT	635.715	1.00954	0.138771	7.27485	3.46798e-13	1.41561e-10
MCAM	506.26	0.97659	0.137259	7.11496	1.11944e-12	4.42669e-10
FN1	415.32	0.975746	0.159361	6.12288	9.1899e-10	2.04016e-07
LDHA	511.038	0.973893	0.130137	7.48359	7.23206e-14	3.15567e-11
PCDHA13	32.9448	0.949887	0.222681	4.26569	1.99288e-05	0.00125564
BST2	39.0351	0.948951	0.222529	4.2644	2.00442e-05	0.00125564
AASS	139.025	0.948068	0.190338	4.98098	6.32638e-07	7.21208e-05
INHBE	87.3857	0.939397	0.216648	4.33606	1.45059e-05	0.00097917
OPTN	144.186	0.92752	0.184184	5.03584	4.75749e-07	5.67937e-05
PTPRH	220.85	0.920573	0.192527	4.78152	1.73973e-06	0.000163071
ATF5	184.908	0.914585	0.189261	4.83239	1.34904e-06	0.000134416
SERPINE2	91.8153	0.912991	0.203104	4.49519	6.95064e-06	0.000502591
PRLHR	45.7203	0.906624	0.221195	4.09875	4.15383e-05	0.00224626
GABARAPL1	181.75	0.89947	0.18915	4.75533	1.98122e-06	0.000181669
LAYN	80.1166	0.89641	0.208585	4.29757	1.72678e-05	0.00110917
WNT6	101.897	0.888013	0.2088	4.25293	2.10993e-05	0.00131336
CHODL	191.685	0.88495	0.181651	4.8717	1.10641e-06	0.000114758
ACCN4	435.368	0.879271	0.148428	5.92388	3.14432e-09	6.21692e-07
ZNF323	126.884	0.878359	0.183046	4.79857	1.59806e-06	0.000153196
NTNG2	57.7396	0.875803	0.217998	4.01747	5.88256e-05	0.00297751
DHRS2	64.976	0.875798	0.211425	4.14235	3.43761e-05	0.00192476
TGFB3	124.809	0.871733	0.189355	4.60371	4.15038e-06	0.000341032
ROCK1P1	34.6668	0.869369	0.223041	3.8978	9.70695e-05	0.00438972
YPEL2	394.989	0.868422	0.146893	5.91194	3.38103e-09	6.58209e-07
ISLR	250.637	0.858537	0.166278	5.16328	2.42665e-07	3.16566e-05
MXRA8	85.3456	0.846189	0.205615	4.1154	3.865e-05	0.00211722
LGALS3	67.2283	0.837368	0.212453	3.94142	8.09996e-05	0.00376827
PKHD1	94.0522	0.836365	0.20096	4.16185	3.15677e-05	0.0018075
PTH2R	107.335	0.833413	0.197578	4.21814	2.46328e-05	0.00147727
ARHGEF2	346.569	0.832483	0.185349	4.49143	7.07466e-06	0.000508652
SNX33	52.2132	0.832206	0.217999	3.81748	0.000134823	0.00569561
FAM210B	190.787	0.831975	0.181348	4.58772	4.48114e-06	0.000350027
RASAL2	60.4024	0.827785	0.212841	3.88921	0.00010057	0.00452887
GPR114	53.3946	0.818458	0.218697	3.74242	0.000182256	0.00727528
PI15	56.9659	0.816787	0.219179	3.72657	0.000194105	0.00760434
BOK	94.7757	0.815946	0.202038	4.03858	5.37747e-05	0.00280027
RNF182	57.9974	0.811958	0.217806	3.7279	0.000193081	0.00758773
AFAP1-AS1	52.1193	0.811168	0.21835	3.71499	0.00020321	0.00787138
ITGA11	65.8805	0.803032	0.215666	3.7235	0.000196479	0.00767072
CES3	82.7779	0.802977	0.201962	3.97588	7.01197e-05	0.0033996
LOXL4	51.5901	0.802612	0.218879	3.66693	0.000245482	0.00897726
USH2A	102.656	0.790253	0.196974	4.01197	6.02145e-05	0.00303567
PCDHA1	47.5831	0.789766	0.220646	3.57934	0.000344463	0.0112923
NDRG1	61.5385	0.782947	0.218576	3.58204	0.000340925	0.0112863
CTHRC1	134.131	0.782292	0.188136	4.15813	3.2087e-05	0.00182896
LOX	59.0168	0.779792	0.213379	3.6545	0.000257687	0.00926356
IL20RA	37.6666	0.779003	0.222716	3.49774	0.000469215	0.0144464
COL9A3	70.2682	0.77869	0.211914	3.67456	0.000238258	0.00879427
SLITRK6	283.286	0.777013	0.164549	4.72207	2.33457e-06	0.000211012
PLEKHG5	74.3622	0.774691	0.215585	3.59344	0.000326339	0.0109246
NQO1	384.39	0.768818	0.169022	4.54863	5.39974e-06	0.000411616
PCDHA6	29.7123	0.765708	0.222958	3.43431	0.000594067	0.017321
LTBP4	247.035	0.764427	0.177051	4.31755	1.57771e-05	0.00104525
C5orf41	191.166	0.763683	0.179061	4.26493	1.99967e-05	0.00125564
FMN1	66.7094	0.763474	0.212755	3.5885	0.00033258	0.0110749
SNORD114-14	89.5853	0.760164	0.201012	3.78168	0.000155772	0.00644163
LUM	152.293	0.75427	0.190603	3.95729	7.5804e-05	0.0035926
KIAA1324L	246.259	0.752677	0.166211	4.52844	5.94201e-06	0.000444912
MPZ	45.5522	0.752201	0.221666	3.3934	0.000690302	0.019114
TRIM66	32.7216	0.748968	0.223036	3.35806	0.000784929	0.0209546
SWT1	96.2886	0.743861	0.195676	3.80149	0.000143829	0.00602652
KCNA3	84.7477	0.74116	0.215147	3.4449	0.000571276	0.01689
PCDHA3	101.302	0.736958	0.19382	3.80228	0.000143368	0.00602652
SIDT2	233.067	0.732951	0.160199	4.57526	4.75632e-06	0.000369242
PCDHB12	37.3167	0.729298	0.222705	3.27472	0.00105766	0.0254926
IRF9	56.8327	0.728148	0.217031	3.35504	0.000793522	0.0210421
ANGPT1	42.6288	0.727332	0.220914	3.29238	0.000993432	0.0245525
MAFB	29.3913	0.725503	0.222936	3.25432	0.00113665	0.0267686
CPT1A	611.285	0.722352	0.126825	5.69566	1.22898e-08	2.15994e-06
SAMD5	35.9786	0.722073	0.222899	3.23946	0.00119756	0.02762
KLHL24	1712.93	0.722015	0.138101	5.22818	1.71187e-07	2.35457e-05
FAM184A	104.084	0.720943	0.198558	3.63089	0.000282447	0.00981891
SEMA6D	148.946	0.720845	0.182382	3.95239	7.7375e-05	0.00363979
HYLS1	142.311	0.718794	0.179654	4.00098	6.30806e-05	0.00315503
DNAJA4	105.85	0.718047	0.196165	3.66043	0.000251791	0.00912089
PIK3IP1	480.131	0.717576	0.135729	5.28681	1.24465e-07	1.76964e-05
SPARC	355.693	0.71435	0.152494	4.68445	2.80719e-06	0.000248407
LOC100506123	41.1732	0.706745	0.221227	3.19467	0.00139993	0.0308619
LOC100506433	67.8767	0.705754	0.214444	3.29109	0.000997997	0.0246173
SCN9A	341.863	0.704977	0.150689	4.67836	2.89174e-06	0.000250631
TMEM130	164.604	0.704538	0.185698	3.79399	0.000148243	0.00615039
JUP	501.786	0.703836	0.178002	3.95409	7.68276e-05	0.00362752
ISLR2	80.3745	0.701038	0.21282	3.29404	0.00098759	0.0245039
MAPK13	45.9558	0.700648	0.221188	3.16766	0.00153673	0.0327047
DSE	157.747	0.698462	0.182656	3.82393	0.000131343	0.00560823
GUCY1B3	237.335	0.69571	0.162986	4.26853	1.96762e-05	0.00125117
SHC2	58.4696	0.694721	0.219648	3.16289	0.00156211	0.0329449
FGFR3	42.1139	0.69458	0.222197	3.12596	0.00177227	0.0360336
GTF2IRD2B	43.2446	0.693179	0.220642	3.14164	0.00168002	0.0346734
ZNF589	149.699	0.690046	0.182944	3.7719	0.000162012	0.00661513
CADPS	1249.61	0.689913	0.11399	6.0524	1.42703e-09	3.0096e-07
PPL	67.0216	0.689556	0.211491	3.26045	0.00111235	0.0264085
MIR100HG	106.505	0.689078	0.198441	3.47245	0.000515727	0.0155193
CRISPLD2	55.2079	0.68883	0.217189	3.17156	0.00151622	0.0324092
STAT2	192.216	0.688775	0.170015	4.05125	5.09451e-05	0.00268198
SNORD116-18	161.27	0.685373	0.178657	3.83625	0.000124929	0.00537704
MAP1LC3B	597.504	0.683945	0.162695	4.20385	2.62408e-05	0.00155164
PAK3	105.117	0.682644	0.201807	3.38266	0.000717876	0.0196199
AOX1	98.9755	0.682035	0.195744	3.48432	0.000493389	0.0150389
FLJ43663	138.248	0.680871	0.184104	3.6983	0.000217049	0.00822317
COL6A3	87.1686	0.680732	0.206548	3.29576	0.000981554	0.0244019
NFKB2	43.7619	0.679121	0.219298	3.0968	0.00195623	0.038618
PAR-SN	261.71	0.673493	0.160016	4.20892	2.56598e-05	0.00152441
GPR146	89.057	0.669533	0.199501	3.35604	0.000790666	0.0210421
CRABP2	96.43	0.664377	0.208634	3.18441	0.00145048	0.0313214
NBR2	63.1142	0.663267	0.212686	3.11853	0.00181756	0.0366232
CCNG2	360.831	0.66286	0.15704	4.22095	2.43273e-05	0.00146589
JHDM1D	656.088	0.661119	0.143756	4.59891	4.24704e-06	0.000346723
XK	71.5049	0.660627	0.21382	3.08964	0.00200397	0.0393151
SLC7A11	526.903	0.658943	0.220421	2.98948	0.00279454	0.0483749
SYT5	156.656	0.65804	0.194319	3.38639	0.000708192	0.0194217
RNPC3	262.301	0.657621	0.157422	4.17745	2.94797e-05	0.00170352
KDM5B	1294.57	0.654925	0.124164	5.27469	1.32983e-07	1.86974e-05
LOC90246	52.9822	0.654478	0.215754	3.03344	0.00241781	0.0441485
LINC00176	397.015	0.653144	0.143268	4.55889	5.14242e-06	0.000394377
MSX2	562.13	0.652064	0.147855	4.41016	1.03293e-05	0.000714248
SRPK3	53.9509	0.650481	0.21669	3.00189	0.00268311	0.0468951
PTGER1	156.867	0.649897	0.177571	3.65994	0.000252277	0.00912089
FILIP1L	70.8997	0.647461	0.209277	3.09379	0.00197616	0.0388902
TSPYL2	506.745	0.645031	0.131818	4.89334	9.91396e-07	0.000106315
AKD1	52.9848	0.644988	0.216409	2.98042	0.00287857	0.0495584
DYNC2H1	1130.65	0.642372	0.139894	4.59184	4.39349e-06	0.000348801
FAM214A	312.978	0.638743	0.164464	3.8838	0.000102839	0.00458702
SERPINH1	802.031	0.634197	0.150058	4.22635	2.37515e-05	0.00143805
ZNF470	164.662	0.633704	0.1747	3.62739	0.000286305	0.00992576
KLF9	343.012	0.632859	0.146162	4.32984	1.49215e-05	0.000999028
SSTR2	307.982	0.632464	0.152169	4.15631	3.23424e-05	0.00183525
CSPG4	90.7202	0.631753	0.20048	3.15121	0.00162597	0.0337848
LTK	379.865	0.629311	0.154804	4.06521	4.79882e-05	0.00255144
ZNF641	125.021	0.62913	0.1942	3.23959	0.001197	0.02762
ADCYAP1R1	842.807	0.628578	0.133791	4.6982	2.62462e-06	0.000235546
ISYNA1	307.684	0.627561	0.160023	3.92168	8.79335e-05	0.00404622
GPR176	86.6227	0.62019	0.206292	3.00637	0.00264383	0.0464009
GOLGB1	1373.5	0.619364	0.116367	5.3225	1.02351e-07	1.48868e-05
ENPP2	1864.24	0.618897	0.120987	5.11539	3.13092e-07	3.89246e-05
SCN3A	276.071	0.617413	0.166749	3.70265	0.000213362	0.00813217
SELENBP1	91.6444	0.616241	0.200563	3.07256	0.00212231	0.0409385
DGKB	223.155	0.614619	0.168546	3.64659	0.000265744	0.00944586
EDNRA	853.87	0.612393	0.140803	4.34929	1.36579e-05	0.00092918
ZNF233	95.3643	0.611692	0.199218	3.07047	0.00213722	0.0409493
LMO4	760.294	0.608022	0.131715	4.61618	3.90869e-06	0.000325398
VIM	3328.25	0.606579	0.121181	5.00557	5.5696e-07	6.40706e-05
LONRF2	563.149	0.604958	0.131655	4.59501	4.32729e-06	0.000348201
PFKFB2	139.853	0.603152	0.194125	3.10702	0.00188981	0.0375715
GANC	121.144	0.602453	0.186804	3.22505	0.00125952	0.0285116
MCF2L2	102.089	0.597431	0.19739	3.02665	0.00247283	0.0444476
PDIA2	1303.87	0.596454	0.122924	4.85223	1.22083e-06	0.000123587
STC2	600.379	0.596329	0.169638	3.51531	0.000439238	0.013627
ZNF667	214.691	0.59299	0.163055	3.63675	0.000276103	0.00967813
NTRK1	691.514	0.592211	0.130598	4.5346	5.77131e-06	0.000434703
RPS6KA5	132.547	0.592198	0.184331	3.21268	0.00131504	0.0293602
C7orf41	991.494	0.590938	0.121618	4.85899	1.17988e-06	0.000121372
SYNM	1520.03	0.588218	0.11685	5.03394	4.8051e-07	5.68259e-05
ANKRA2	183.539	0.585629	0.175982	3.32778	0.000875415	0.0225153
PGAM2	372.336	0.583625	0.148906	3.91941	8.87644e-05	0.00406966
ZNF808	178.457	0.583316	0.1726	3.37959	0.000725935	0.0197244
TEP1	113.738	0.581733	0.193265	3.01003	0.00261222	0.0459097
KDM3A	352.741	0.580128	0.151982	3.8171	0.000135031	0.00569561
MRC2	199.571	0.579371	0.168488	3.43865	0.000584613	0.017164
SNORD116-20	205.946	0.57617	0.178008	3.23676	0.00120896	0.0277141
CELF3	333.467	0.57562	0.167143	3.44387	0.000573446	0.0169147
ZNF10	221.348	0.574586	0.168434	3.41133	0.000646461	0.0184657
KAT6B	254.771	0.573028	0.159013	3.60365	0.000313775	0.0106643
CBFA2T2	750.39	0.570948	0.137866	4.14133	3.45302e-05	0.00192487
PTGER3	219.683	0.567043	0.174912	3.24188	0.00118744	0.02762
HERC2P2	1174.02	0.566732	0.11808	4.79955	1.59021e-06	0.000153196
MYH15	198.342	0.56421	0.171953	3.28118	0.00103372	0.0250588
ZNF606	230.554	0.563084	0.158199	3.55933	0.000371801	0.011941
CDH10	514.435	0.561096	0.145897	3.84584	0.000120141	0.00522426
PARVA	917.783	0.560907	0.125586	4.46632	7.95749e-06	0.000559412
LOC100505678	376.19	0.560745	0.152497	3.67708	0.000235916	0.00875449
SIPA1L2	238.257	0.557651	0.166231	3.35468	0.000794578	0.0210421
MADD	651.192	0.556559	0.134263	4.14527	3.39412e-05	0.00190885
ARHGAP26	207.442	0.554008	0.164684	3.36407	0.000768025	0.0206339
ITGA6	204.527	0.550819	0.172901	3.18574	0.00144382	0.0312309
C6orf170	240.176	0.550699	0.172522	3.19206	0.00141264	0.0308975
ZDBF2	1418.28	0.550543	0.12594	4.37145	1.23422e-05	0.000844203
POLM	165.528	0.549287	0.172266	3.1886	0.00142964	0.0310302
ATP2B4	213.785	0.547291	0.167526	3.26689	0.00108735	0.0260594
CSRP1	229.02	0.547198	0.169287	3.23237	0.00122767	0.0280922
CALCOCO1	329.28	0.544708	0.155958	3.49265	0.000478251	0.0146374
HLA-C	410.197	0.543486	0.147451	3.68588	0.000227917	0.00853272
PAR5	535.811	0.542602	0.147352	3.68236	0.000231087	0.00860512
DEPTOR	773.963	0.540199	0.122685	4.40315	1.06689e-05	0.00073372
SIAE	185.813	0.535094	0.17253	3.10145	0.00192577	0.0381955
SNORD116-21	273.614	0.532048	0.173141	3.07291	0.0021198	0.0409385
ZNF558	193.73	0.530494	0.167565	3.16591	0.00154601	0.0328242
ZNF460	894.272	0.528655	0.126476	4.1799	2.91634e-05	0.00170352
ZNF577	191.635	0.524085	0.16784	3.12253	0.00179303	0.0362846
EPHX2	472.4	0.523801	0.137109	3.82034	0.000133268	0.00565898
CPT1C	217.663	0.520703	0.171032	3.04448	0.00233085	0.0432174
GOLGA8A	308.6	0.516776	0.165766	3.1175	0.00182395	0.036636
PLIN2	164.322	0.515012	0.170107	3.02758	0.00246523	0.0444476
TTLL7	331.163	0.514919	0.143919	3.57783	0.000346454	0.0113282
DKK1	370.595	0.513029	0.157376	3.25988	0.00111458	0.0264119
WDR5B	298.958	0.509961	0.153112	3.33064	0.00086646	0.0223303
SLC12A6	202.704	0.509204	0.169069	3.01182	0.00259689	0.0457675
SGSM1	285.288	0.506268	0.159228	3.17951	0.00147525	0.0316949
TTN	686.11	0.504331	0.150047	3.36116	0.000776169	0.0207646
ING4	260.001	0.501978	0.156135	3.21502	0.00130436	0.0292649
TBCK	343.303	0.499368	0.151221	3.30224	0.000959147	0.0240124
CD24	1877.33	0.499139	0.108751	4.58974	4.43788e-06	0.000348801
SESN3	931.002	0.498685	0.139161	3.58351	0.000339009	0.0112594
LOC100506548	1938.13	0.498125	0.111042	4.48592	7.26014e-06	0.000516123
HEY1	386.968	0.495788	0.141128	3.51303	0.000443023	0.0137066
SLC4A8	791.542	0.495468	0.139982	3.53951	0.000400877	0.0127455
TBX20	685.058	0.495017	0.145504	3.40209	0.000668734	0.018786
MICAL1	961.791	0.493036	0.126878	3.88589	0.000101956	0.004575
ZNF528	314.287	0.492603	0.147555	3.33843	0.000842533	0.0219322
SNORD113-4	224.376	0.49121	0.159168	3.08611	0.00202797	0.039603
DCX	898.183	0.49053	0.155811	3.14824	0.00164257	0.0340739
NKTR	619.306	0.490215	0.135761	3.61087	0.000305176	0.0104089
AKAP9	1756.95	0.489864	0.130491	3.75399	0.00017404	0.00699145
MTMR7	241.954	0.489358	0.160549	3.04803	0.00230347	0.0431638
CNGB1	616.597	0.488961	0.148062	3.3024	0.000958625	0.0240124
PCMTD1	539.346	0.486066	0.138175	3.51777	0.000435197	0.013627
CHGB	11131.6	0.482515	0.104492	4.61772	3.87987e-06	0.000325138
LOC100129917	236.546	0.482408	0.158479	3.04399	0.00233461	0.0432174
LRIF1	343.473	0.481341	0.145141	3.31637	0.000911934	0.0232654
SAMD11	1383.8	0.481315	0.121016	3.97728	6.97076e-05	0.00339261
ZNF850	936.957	0.48089	0.13274	3.62279	0.000291446	0.0100216
PREX1	334.306	0.477948	0.154734	3.08884	0.00200942	0.039361
VWDE	364.519	0.474938	0.155895	3.04653	0.00231497	0.0432059
AKAP12	5333.88	0.472363	0.104047	4.53989	5.62827e-06	0.000426468
ZNF226	421.993	0.47178	0.14288	3.30194	0.000960192	0.0240124
DDR1	415.79	0.467612	0.149996	3.11749	0.00182398	0.036636
KIAA1024	574.609	0.465907	0.140787	3.3093	0.000935281	0.0236229
KCNT2	511.684	0.464701	0.14663	3.1692	0.00152859	0.0326185
CLK4	326.901	0.46442	0.152029	3.05481	0.00225206	0.0424071
LOC100129387	518.959	0.462962	0.142277	3.25396	0.0011381	0.0267686
GPR155	317.153	0.460607	0.150953	3.05132	0.00227836	0.0428385
PKD1P1	1549.39	0.457845	0.134119	3.41373	0.000640802	0.0184264
HECTD2	349.459	0.456944	0.14467	3.15853	0.00158568	0.0331109
YPEL5	486.574	0.456505	0.134412	3.3963	0.000683022	0.0190226
MALAT1	17717.9	0.454818	0.13346	3.40789	0.000654668	0.0185702
IGFBP5	1477.24	0.453958	0.13487	3.36589	0.000762964	0.0205758
LOC642852	415.546	0.453271	0.149757	3.02671	0.0024723	0.0444476
ABAT	823.026	0.452808	0.124047	3.65029	0.000261945	0.00933707
TTC17	883.497	0.45088	0.11649	3.87055	0.00010859	0.00480452
PRPH	6863.61	0.448945	0.138274	3.24679	0.00116715	0.0273503
FAM115A	1925.96	0.446882	0.106975	4.17743	2.94824e-05	0.00170352
CCDC144B	438.312	0.445586	0.147061	3.02994	0.00244601	0.0444476
PNPLA8	613.268	0.44285	0.133889	3.30759	0.000941035	0.0237208
ANKZF1	574.054	0.442421	0.129999	3.40328	0.000665822	0.018777
PDCD4	1260.95	0.442022	0.117489	3.76223	0.000168403	0.00680821
PRKAB2	472.434	0.440213	0.139972	3.14501	0.00166084	0.0343403
SCN3B	1033.27	0.440058	0.138563	3.17587	0.00149387	0.0319856
ANKRD36	652.459	0.439833	0.127956	3.43737	0.000587388	0.0172056
WSB1	447.4	0.439795	0.141455	3.10907	0.00187677	0.0375177
C1orf9	1168.03	0.437042	0.120303	3.63284	0.00028032	0.0097988
KCNQ1OT1	871.292	0.43699	0.14669	2.979	0.00289189	0.0497063
CCNL2	2963.32	0.435998	0.108473	4.0194	5.83463e-05	0.00296512
KCTD12	979.038	0.434704	0.130786	3.32378	0.000888072	0.0227944
TMF1	625.664	0.433012	0.127755	3.3894	0.000700454	0.0193527
ZNF542	372.714	0.431433	0.141143	3.05672	0.00223776	0.0422636
LRRTM2	748.739	0.428771	0.132088	3.2461	0.00116998	0.0273659
GUCY1A3	1579.32	0.428583	0.134275	3.19183	0.00141375	0.0308975
SENP7	616.289	0.423941	0.141318	2.99991	0.00270061	0.0471359
VAT1	1740.68	0.420751	0.125457	3.35374	0.000797279	0.0210421
NADKD1	452.654	0.419155	0.13542	3.09523	0.0019666	0.0387623
BTG2	518.387	0.417327	0.132173	3.15744	0.00159159	0.0331796
DST	2941.79	0.416447	0.122013	3.41315	0.00064217	0.0184264
ATF7IP	656.687	0.41596	0.12776	3.2558	0.00113074	0.0267446
RUFY3	2291.42	0.415904	0.122213	3.4031	0.00066626	0.018777
LOC100506710	1003.58	0.415149	0.116796	3.55447	0.000378739	0.0121331
NBR1	1804.71	0.414422	0.106712	3.88354	0.000102949	0.00458702
KIFAP3	539.892	0.412191	0.130359	3.16197	0.00156704	0.0329938
EPB41L4A-AS1	883.442	0.410563	0.124879	3.28768	0.00101017	0.0247726
NFATC4	1234.55	0.40771	0.111969	3.64126	0.000271305	0.00958964
MORC3	475.798	0.405713	0.135699	2.9898	0.00279161	0.0483749
IGFBP7	830.489	0.403571	0.13562	2.97574	0.00292286	0.0498462
UBE2H	1178.26	0.402019	0.122303	3.28708	0.00101233	0.0247777
GOLGA2	585.129	0.398588	0.12808	3.11203	0.00185806	0.0372533
JMY	775.894	0.398147	0.123429	3.22571	0.00125662	0.0285116
MIA3	1207.24	0.391058	0.115239	3.39346	0.000690154	0.019114
RBM20	623.31	0.390304	0.130742	2.98529	0.0028331	0.0488421
BRWD1	2560.98	0.390134	0.131095	2.97597	0.00292067	0.0498462
SOS2	657.566	0.387095	0.123992	3.12194	0.00179666	0.0362846
CREG1	698.898	0.386313	0.128812	2.99906	0.00270815	0.0472025
SMAD6	1110.04	0.38395	0.118879	3.22975	0.00123901	0.0282493
MAGED2	5191.4	0.38204	0.108499	3.52114	0.0004297	0.0134985
PDE4DIP	961.316	0.381325	0.117793	3.23723	0.00120695	0.0277141
SON	3119.91	0.379196	0.115449	3.28453	0.00102152	0.0249159
TTC14	854.96	0.377727	0.122763	3.07687	0.00209188	0.0405991
CDK5RAP3	1445.87	0.373847	0.111482	3.35342	0.000798182	0.0210421
BOD1L	1327.92	0.37371	0.118259	3.16009	0.0015772	0.0330429
TRIP11	990.378	0.372785	0.121942	3.05706	0.00223517	0.0422636
FLNA	8269.44	0.365146	0.118897	3.07111	0.00213264	0.0409493
ATRX	2441.73	0.36319	0.120025	3.02595	0.00247853	0.044487
GAS5	4321.7	0.362746	0.121118	2.99499	0.00274457	0.0477057
PNMA2	766.98	0.354776	0.119115	2.97842	0.00289735	0.0497063
STXBP5	1587.31	0.347976	0.114801	3.03112	0.00243651	0.0444259
LAMB1	3724.74	0.346128	0.107703	3.21372	0.00131026	0.0293453
MXD4	1626.06	0.34555	0.110373	3.13075	0.00174359	0.0355954
THOC5	1776.92	0.345086	0.106532	3.23928	0.00119831	0.02762
LTA4H	1274.99	0.344396	0.115258	2.98803	0.00280778	0.0485377
PSAP	8331.16	0.335278	0.109191	3.07057	0.00213647	0.0409493
RHOBTB3	3497.3	0.312951	0.103334	3.02853	0.00245749	0.0444476

## Sheet: Be(2)-C_EPZ-6438+DAC
	baseMean	log2FoldChange	lfcSE	stat	pvalue	padj
H19	586.526	4.29788	0.171947	24.9953	6.87407e-138	8.69844e-134
NGFR	134.811	2.87373	0.196921	14.5933	3.09621e-48	6.5299e-45
DCAF4L1	166.046	2.79989	0.19931	14.0479	7.93338e-45	1.00389e-41
FN1	415.32	2.74787	0.154857	17.7445	1.89971e-70	1.20195e-66
AHNAK	1494.12	2.11401	0.146809	14.3998	5.19187e-47	9.38542e-44
BMF	164.841	1.93705	0.178442	10.8553	1.88106e-27	6.1033e-25
HR	187.432	1.85871	0.185655	10.0116	1.35509e-23	3.0083e-21
ACCN4	435.368	1.85652	0.145997	12.7161	4.81066e-37	3.0437e-34
PAK3	105.117	1.83081	0.197376	9.27574	1.76399e-20	2.89889e-18
ARHGAP36	170.221	1.8182	0.182629	9.95574	2.3805e-23	5.02048e-21
CHODL	191.685	1.78567	0.178694	9.99292	1.63685e-23	3.57115e-21
CRABP2	96.43	1.78338	0.205646	8.6721	4.24241e-18	5.36835e-16
COL6A3	87.1686	1.76797	0.203018	8.70844	3.08098e-18	4.06112e-16
BOK	94.7757	1.72811	0.198897	8.68849	3.67289e-18	4.77765e-16
TP53INP1	448.407	1.69305	0.150989	11.213	3.51881e-29	1.2722e-26
IRF6	230.489	1.65823	0.167197	9.91777	3.48446e-23	6.99879e-21
FSTL1	202.347	1.65556	0.17231	9.60803	7.39536e-22	1.35625e-19
LAYN	80.1166	1.64516	0.206511	7.96643	1.63326e-15	1.51965e-13
ZNF641	125.021	1.64003	0.190115	8.6265	6.3257e-18	7.7714e-16
WNT6	101.897	1.62297	0.207093	7.83689	4.61849e-15	3.97568e-13
SPARC	355.693	1.6195	0.150142	10.7864	3.98905e-27	1.26194e-24
ADAMTS2	160.207	1.60518	0.180768	8.87976	6.70035e-19	9.52654e-17
GSN	55.3137	1.59721	0.216832	7.36613	1.75649e-13	1.24868e-11
ENC1	2364.83	1.56463	0.113028	13.8428	1.40568e-43	1.48229e-40
INSRR	98.6095	1.56314	0.199588	7.83181	4.80882e-15	4.11154e-13
EPAS1	147.884	1.54346	0.203838	7.57198	3.67585e-14	2.83623e-12
NTRK1	691.514	1.51984	0.128678	11.8112	3.41596e-32	1.54377e-29
MXRA8	85.3456	1.4831	0.203851	7.27541	3.45382e-13	2.34971e-11
IGFBP3	360.676	1.47979	0.158677	9.32576	1.10192e-20	1.88429e-18
KIAA1324L	246.259	1.46883	0.163931	8.96006	3.24504e-19	4.71985e-17
PLEKHG5	74.3622	1.46098	0.214305	6.81731	9.27617e-12	4.99492e-10
YPEL2	394.989	1.4605	0.145471	10.0398	1.01921e-23	2.34493e-21
DSE	157.747	1.45795	0.180057	8.0972	5.62399e-16	5.55985e-14
ITGA6	204.527	1.45657	0.169773	8.5795	9.52866e-18	1.12688e-15
TMEM59L	88.2048	1.45349	0.212349	6.8448	7.65819e-12	4.23173e-10
NAV2	48.1366	1.44558	0.221819	6.51692	7.17634e-11	3.4011e-09
PGAM2	372.336	1.4433	0.146289	9.86613	5.83758e-23	1.13644e-20
SSTR2	307.982	1.44191	0.14958	9.63973	5.43318e-22	1.01105e-19
KRT19	112.487	1.43514	0.197864	7.25315	4.07204e-13	2.69639e-11
SHC2	58.4696	1.42351	0.218365	6.51894	7.08071e-11	3.36839e-09
ENTPD3	119.385	1.41454	0.194953	7.25583	3.99209e-13	2.65873e-11
HOTAIR	286.078	1.41253	0.161162	8.76466	1.87345e-18	2.5491e-16
GPER	41.5651	1.40515	0.222151	6.32518	2.52941e-10	1.04258e-08
REST	44.1196	1.40321	0.220491	6.36405	1.96506e-10	8.34424e-09
GABARAPL1	181.75	1.40222	0.187945	7.46082	8.59848e-14	6.40031e-12
AASS	139.025	1.39682	0.189059	7.38828	1.48737e-13	1.07549e-11
CPXM1	66.5645	1.39634	0.213942	6.52673	6.72197e-11	3.22196e-09
NTNG2	57.7396	1.39062	0.217093	6.40563	1.4975e-10	6.60257e-09
MYO18B	62.0435	1.38902	0.213797	6.49688	8.20046e-11	3.81502e-09
MIR100HG	106.505	1.38642	0.196263	7.06407	1.6169e-12	9.88419e-11
CADPS	1249.61	1.37745	0.113067	12.1826	3.84943e-34	1.94843e-31
DLG2	165.269	1.37332	0.174188	7.88414	3.16701e-15	2.78301e-13
GPR176	86.6227	1.36596	0.204042	6.69453	2.16368e-11	1.09517e-09
DGKB	223.155	1.35593	0.166095	8.16359	3.25222e-16	3.24044e-14
XK	71.5049	1.35546	0.212236	6.38659	1.69622e-10	7.40135e-09
LRRC17	42.7175	1.3475	0.22045	6.11249	9.80907e-10	3.67231e-08
CDH6	166.453	1.34714	0.193737	6.95343	3.56518e-12	2.0886e-10
TGFB3	124.809	1.34086	0.18804	7.13068	9.98708e-13	6.35058e-11
LGALS3	67.2283	1.339	0.211306	6.33678	2.34622e-10	9.78706e-09
LRRC4B	71.2219	1.33588	0.20986	6.3656	1.94524e-10	8.28788e-09
COL9A3	70.2682	1.32243	0.210627	6.27855	3.41744e-10	1.39498e-08
ENPP2	1864.24	1.32004	0.12042	10.962	5.81945e-28	1.93788e-25
SPOCK2	55.6391	1.30682	0.215454	6.06543	1.31603e-09	4.841e-08
SERPINF1	836.788	1.30635	0.128023	10.204	1.90217e-24	4.81402e-22
BST2	39.0351	1.30344	0.222317	5.86296	4.54688e-09	1.48672e-07
IL13RA1	71.5105	1.28832	0.210529	6.11946	9.38909e-10	3.536e-08
TMEM130	164.604	1.28461	0.184143	6.97617	3.0334e-12	1.78533e-10
CD24	1877.33	1.27954	0.107981	11.8497	2.15893e-32	1.05073e-29
MIAT	635.715	1.27483	0.138494	9.20494	3.41851e-20	5.47567e-18
GPR68	70.8192	1.27446	0.210424	6.05664	1.38992e-09	5.08325e-08
HLA-E	50.6767	1.27254	0.220107	5.78148	7.4045e-09	2.32498e-07
LOXL4	51.5901	1.26478	0.218111	5.7988	6.67927e-09	2.11299e-07
RNF182	57.9974	1.26469	0.217008	5.82786	5.61413e-09	1.80308e-07
CDH11	102.231	1.26297	0.199319	6.33645	2.35125e-10	9.78706e-09
CBLN4	165.421	1.25991	0.175954	7.16046	8.04061e-13	5.16476e-11
PIK3IP1	480.131	1.25098	0.134487	9.30184	1.38032e-20	2.29823e-18
HLA-C	410.197	1.24792	0.145579	8.57216	1.01565e-17	1.16837e-15
KCTD12	979.038	1.24485	0.129632	9.60289	7.77356e-22	1.40524e-19
CCNG2	360.831	1.23902	0.155736	7.95588	1.77859e-15	1.63089e-13
CHGB	11131.6	1.23201	0.10436	11.8054	3.66133e-32	1.5976e-29
NDRG1	61.5385	1.23118	0.217955	5.64877	1.61595e-08	4.88026e-07
PKHD1	94.0522	1.22841	0.199985	6.14251	8.12274e-10	3.09594e-08
NUAK1	53.3189	1.22682	0.220206	5.57124	2.52936e-08	7.30743e-07
TCP11L2	36.6164	1.21916	0.222776	5.4726	4.4349e-08	1.23611e-06
LINC00176	397.015	1.21678	0.14187	8.57672	9.76142e-18	1.14371e-15
LOC100506433	67.8767	1.21434	0.213422	5.68988	1.27126e-08	3.88563e-07
MMP11	124.345	1.21369	0.188959	6.42303	1.33585e-10	5.95206e-09
MCTP2	49.2609	1.2086	0.219966	5.49446	3.91911e-08	1.10451e-06
ITGA11	65.8805	1.20734	0.214991	5.61578	1.95681e-08	5.81257e-07
SPOCK1	107.38	1.20083	0.201624	5.95579	2.5882e-09	8.89975e-08
DFNA5	88.2225	1.20019	0.200083	5.99846	1.99199e-09	7.08053e-08
FNDC5	364.951	1.19063	0.144055	8.26515	1.39515e-16	1.45903e-14
MECOM	94.051	1.19042	0.199457	5.96832	2.39716e-09	8.30958e-08
LTBP4	247.035	1.18994	0.17622	6.75261	1.45213e-11	7.56184e-10
HOMEZ	141.506	1.18561	0.185429	6.39388	1.61728e-10	7.08992e-09
IGFBP7	830.489	1.18497	0.134326	8.82161	1.1283e-18	1.55191e-16
VSTM2L	120.208	1.18452	0.190326	6.22363	4.85791e-10	1.92702e-08
MSX2	562.13	1.17886	0.147045	8.01697	1.08382e-15	1.0159e-13
JUP	501.786	1.17629	0.177557	6.62483	3.47655e-11	1.70682e-09
CRLF1	32.2596	1.17513	0.222908	5.27183	1.35071e-07	3.37118e-06
IGFBP5	1477.24	1.17453	0.134245	8.74918	2.14911e-18	2.89306e-16
TPM2	92.5122	1.1739	0.201679	5.82064	5.86224e-09	1.878e-07
TDRD7	89.9716	1.17326	0.204068	5.74937	8.95773e-09	2.77821e-07
FGFR3	42.1139	1.17058	0.221769	5.27837	1.30341e-07	3.27899e-06
SIAE	185.813	1.16822	0.170266	6.86115	6.83088e-12	3.82469e-10
ACVRL1	55.1759	1.16802	0.217196	5.37772	7.54349e-08	2.01382e-06
OPTN	144.186	1.16137	0.183775	6.31954	2.62335e-10	1.0743e-08
NTNG1	268.452	1.15332	0.157192	7.33703	2.18389e-13	1.51841e-11
FAM184A	104.084	1.15215	0.197358	5.83788	5.28704e-09	1.71106e-07
CERS4	34.5055	1.14926	0.222879	5.15641	2.5173e-07	5.89887e-06
NEO1	61.7085	1.14507	0.213542	5.36228	8.21796e-08	2.17098e-06
JHDM1D	656.088	1.12506	0.143095	7.86235	3.76996e-15	3.29001e-13
KDM5B	1294.57	1.12316	0.123695	9.08003	1.08544e-19	1.65484e-17
QPCT	59.2639	1.12275	0.21353	5.25805	1.45591e-07	3.61947e-06
DCX	898.183	1.12258	0.155165	7.23477	4.6632e-13	3.05741e-11
CRISPLD2	55.2079	1.11272	0.216413	5.14165	2.72329e-07	6.31146e-06
PRKCH	35.1729	1.11239	0.222545	4.99851	5.77744e-07	1.22808e-05
BTBD17	39.5073	1.10988	0.221419	5.01259	5.3702e-07	1.15963e-05
FMN1	66.7094	1.10831	0.212119	5.22492	1.74234e-07	4.21559e-06
NNAT	52.4045	1.10671	0.218632	5.062	4.14879e-07	9.22627e-06
FSIP2	39.6112	1.10527	0.222713	4.96275	6.95026e-07	1.43942e-05
HOOK1	80.1376	1.10433	0.210593	5.24392	1.57202e-07	3.8626e-06
LRRC32	30.1605	1.10024	0.222935	4.93526	8.00428e-07	1.63629e-05
SCN3A	276.071	1.09982	0.165596	6.64163	3.10237e-11	1.54557e-09
C7orf41	991.494	1.09951	0.120934	9.09183	9.73867e-20	1.50284e-17
ATP2B4	213.785	1.09894	0.165885	6.62468	3.48e-11	1.70682e-09
EDNRA	853.87	1.09529	0.140256	7.80923	5.75385e-15	4.88653e-13
ACRC	54.2003	1.09274	0.219871	4.96991	6.69838e-07	1.40101e-05
SLC4A8	791.542	1.09232	0.13919	7.84768	4.23801e-15	3.67313e-13
RAB3B	54.1706	1.08473	0.21821	4.97102	6.66007e-07	1.39531e-05
RHPN1	112.106	1.08374	0.193138	5.61125	2.0087e-08	5.9515e-07
RAB31	370.24	1.08003	0.148541	7.2709	3.57103e-13	2.40361e-11
SEMA6D	148.946	1.0799	0.181417	5.9526	2.63922e-09	9.05059e-08
UNC13C	28.1756	1.07854	0.22256	4.84605	1.25943e-06	2.45938e-05
MMP15	350.047	1.07802	0.172184	6.26089	3.8278e-10	1.54258e-08
VCAN	864.818	1.0777	0.124174	8.67892	3.9954e-18	5.10685e-16
PLEKHG4	153.033	1.07751	0.179816	5.99229	2.06904e-09	7.27267e-08
GPR114	53.3946	1.0696	0.218456	4.89618	9.77188e-07	1.96587e-05
SELENBP1	91.6444	1.06556	0.199367	5.34471	9.05629e-08	2.35799e-06
SGSM1	285.288	1.0649	0.157655	6.75461	1.43223e-11	7.48904e-10
EGFLAM	53.3718	1.06467	0.219343	4.85392	1.21042e-06	2.37468e-05
SCGN	63.8277	1.06395	0.210413	5.05646	4.27106e-07	9.4486e-06
DGKK	90.1771	1.06118	0.202228	5.24744	1.54231e-07	3.80437e-06
ACP6	58.4409	1.05948	0.218944	4.83906	1.30452e-06	2.5357e-05
ADCYAP1R1	842.807	1.05896	0.133251	7.94712	1.90891e-15	1.72538e-13
ABCA5	45.0962	1.05688	0.222469	4.75067	2.02747e-06	3.72901e-05
ACBD7	113.621	1.05669	0.197537	5.34931	8.82908e-08	2.30833e-06
HIGD1C	63.0018	1.05651	0.218218	4.84152	1.28851e-06	2.51081e-05
ZNF334	77.1827	1.05425	0.207499	5.08074	3.75976e-07	8.40566e-06
S1PR1	71.853	1.05013	0.209656	5.0088	5.47691e-07	1.17665e-05
AGRN	368.498	1.04768	0.169459	6.18248	6.31034e-10	2.47217e-08
TOM1L1	89.5175	1.04719	0.200126	5.23265	1.67097e-07	4.08982e-06
CREB5	63.7469	1.04515	0.211643	4.93826	7.88229e-07	1.61657e-05
CALCB	46.7054	1.04306	0.220889	4.72212	2.33395e-06	4.19515e-05
C8orf42	126.844	1.0405	0.18577	5.60105	2.1306e-08	6.24089e-07
CUX2	185.682	1.0396	0.190001	5.47156	4.46103e-08	1.24066e-06
COL9A2	96.176	1.03917	0.195939	5.30355	1.13572e-07	2.90332e-06
CYP27A1	33.0915	1.03111	0.222754	4.62892	3.6758e-06	6.34565e-05
DCHS1	187.792	1.03063	0.19232	5.3589	8.37287e-08	2.20271e-06
LPPR3	65.4757	1.02984	0.209226	4.92216	8.55931e-07	1.74131e-05
MYO15B	57.5382	1.02886	0.214047	4.80671	1.53435e-06	2.94178e-05
DYRK1B	279.675	1.02574	0.189668	5.40806	6.37126e-08	1.71868e-06
FAT1	100.713	1.02065	0.207466	4.91963	8.67092e-07	1.76118e-05
AMHR2	53.1185	1.01977	0.217178	4.69555	2.65884e-06	4.72961e-05
ALDH1A3	107.031	1.01934	0.19631	5.19248	2.07514e-07	4.91738e-06
PCDHB12	37.3167	1.01741	0.22257	4.57118	4.84974e-06	8.09613e-05
FBN1	333.884	1.01102	0.159218	6.34989	2.15464e-10	9.08827e-09
BTG2	518.387	1.00802	0.130753	7.70933	1.26482e-14	1.02597e-12
PDZD2	172.513	1.00619	0.193015	5.21302	1.85791e-07	4.46959e-06
SATB1	295.541	1.00309	0.160403	6.25356	4.0119e-10	1.60654e-08
ABCA1	29.3527	1.00111	0.222691	4.4955	6.94068e-06	0.000112025
FAM210B	190.787	1.001	0.181257	5.52258	3.34062e-08	9.45688e-07
KLF9	343.012	0.997752	0.145332	6.86534	6.63321e-12	3.73052e-10
ARSD	226.93	0.997187	0.165391	6.02926	1.64707e-09	5.92105e-08
SIDT2	233.067	0.996471	0.159697	6.23976	4.38239e-10	1.74936e-08
C5orf41	191.166	0.995866	0.178718	5.57227	2.51435e-08	7.28068e-07
STC1	135.971	0.993603	0.189311	5.24853	1.53314e-07	3.78914e-06
CNN1	44.0907	0.992031	0.219999	4.50926	6.50545e-06	0.000105946
GM2A	186.144	0.991835	0.166957	5.94067	2.83861e-09	9.68189e-08
PCDHB7	95.3156	0.9911	0.198784	4.98581	6.17037e-07	1.30319e-05
PFKFB2	139.853	0.984155	0.193218	5.09349	3.51523e-07	7.929e-06
CCDC80	124.584	0.983608	0.188029	5.23115	1.68462e-07	4.11528e-06
ALDH1L1	50.0548	0.983237	0.219328	4.48296	7.36157e-06	0.000117174
MATN2	147.543	0.981877	0.178618	5.49707	3.86159e-08	1.09073e-06
STAT2	192.216	0.977411	0.169369	5.7709	7.88497e-09	2.46361e-07
CTHRC1	134.131	0.976875	0.18792	5.19835	2.01068e-07	4.78254e-06
CDH10	514.435	0.976847	0.145235	6.72598	1.74409e-11	8.8991e-10
ODF2L	59.6044	0.976236	0.214249	4.55655	5.20003e-06	8.62401e-05
IL17RD	38.7468	0.975283	0.222903	4.37537	1.21225e-05	0.000180894
KLHL24	1712.93	0.97521	0.138007	7.0664	1.59008e-12	9.76739e-11
ABAT	823.026	0.973905	0.12318	7.90634	2.65061e-15	2.36203e-13
POLD4	121.904	0.971955	0.200078	4.85789	1.18644e-06	2.3385e-05
ENPP4	57.5551	0.971576	0.21851	4.44638	8.73307e-06	0.000134931
PRLHR	45.7203	0.971313	0.221306	4.38901	1.13867e-05	0.000170922
SNX33	52.2132	0.970898	0.217998	4.45369	8.44058e-06	0.000131052
SYT5	156.656	0.970302	0.193751	5.00798	5.50048e-07	1.17971e-05
DIRAS2	65.1541	0.968803	0.211581	4.57888	4.67464e-06	7.85564e-05
SAMD11	1383.8	0.968431	0.120532	8.03461	9.38774e-16	8.93176e-14
YES1	41.5559	0.967036	0.222167	4.35274	1.34444e-05	0.000198282
GRHL1	74.9376	0.966147	0.211934	4.55871	5.14698e-06	8.55846e-05
DCLK1	324.557	0.96447	0.158808	6.0732	1.25386e-09	4.63929e-08
MIPOL1	43.8186	0.962865	0.222233	4.33268	1.47306e-05	0.000214009
SOCS2	55.3668	0.962595	0.215757	4.46148	8.13962e-06	0.000127465
SLC18A2	303.069	0.957942	0.161904	5.91674	3.2839e-09	1.11108e-07
PCDHA1	47.5831	0.956933	0.220598	4.33791	1.43847e-05	0.000210361
ANGPT2	77.106	0.955651	0.203503	4.69599	2.65314e-06	4.72856e-05
DHRS2	64.976	0.954426	0.211623	4.51003	6.48197e-06	0.000105836
ANGPT1	42.6288	0.954032	0.220755	4.32168	1.54843e-05	0.000223164
ACSL6	32.6531	0.95323	0.222574	4.28276	1.84589e-05	0.0002604
FAM214A	312.978	0.953097	0.16393	5.81406	6.09753e-09	1.94353e-07
LOXL1	129.645	0.95162	0.195359	4.87113	1.10961e-06	2.20078e-05
NINL	230.509	0.946399	0.172993	5.47072	4.48201e-08	1.24376e-06
DUSP6	76.6584	0.944576	0.21054	4.48645	7.24206e-06	0.000115708
HOMER3	58.5584	0.944339	0.214848	4.39537	1.10583e-05	0.000166387
ZNF467	38.5176	0.94413	0.222435	4.24452	2.19057e-05	0.000301956
CALCOCO1	329.28	0.943028	0.155061	6.08165	1.18954e-09	4.42717e-08
USH2A	102.656	0.942931	0.196916	4.78849	1.68044e-06	3.18328e-05
TMEFF2	84.9924	0.941845	0.202332	4.65495	3.24065e-06	5.67967e-05
CACNA1H	246.361	0.941686	0.15967	5.89769	3.68624e-09	1.23076e-07
MCAM	506.26	0.938841	0.137712	6.81744	9.26781e-12	4.99492e-10
FILIP1L	70.8997	0.937508	0.208704	4.49204	7.05443e-06	0.000113427
METRNL	84.7694	0.935809	0.208788	4.4821	7.39137e-06	0.000117353
MCF2L2	102.089	0.934683	0.196539	4.75572	1.97741e-06	3.65012e-05
NXT2	181.296	0.928752	0.180615	5.14217	2.71589e-07	6.31008e-06
PON2	84.9584	0.926916	0.203777	4.54867	5.39863e-06	8.92997e-05
NR3C1	60.6858	0.926885	0.215672	4.29766	1.72613e-05	0.000244596
C11orf70	41.2905	0.924314	0.221799	4.16735	3.08163e-05	0.000401596
PI15	56.9659	0.923745	0.219242	4.21335	2.5161e-05	0.000341984
KLHDC8A	33.0803	0.922567	0.222956	4.13789	3.50522e-05	0.000449392
SFRP1	2967.99	0.921769	0.107114	8.60552	7.59746e-18	9.15602e-16
NOTCH2	33.7032	0.920453	0.222982	4.12793	3.6605e-05	0.000465995
FZD4	48.9153	0.920373	0.220029	4.18295	2.87744e-05	0.000381269
STMN4	135.47	0.920159	0.184753	4.98047	6.34293e-07	1.33107e-05
C6orf192	231.844	0.920022	0.163674	5.62107	1.89783e-08	5.65062e-07
IFI16	41.8522	0.919037	0.221645	4.14643	3.377e-05	0.000433833
SAMD5	35.9786	0.917661	0.22286	4.11766	3.82742e-05	0.000482392
PELI2	298	0.917121	0.15608	5.87597	4.20383e-09	1.38529e-07
FAM26E	41.6198	0.916318	0.222689	4.11479	3.8754e-05	0.000487469
PTH2R	107.335	0.91464	0.197799	4.62408	3.76265e-06	6.48673e-05
PLEKHA6	957.639	0.91424	0.135662	6.73909	1.59384e-11	8.23201e-10
ARHGAP22	38.0917	0.911703	0.222144	4.10411	4.0587e-05	0.000507999
FAM160A1	71.4523	0.911288	0.211371	4.31132	1.62286e-05	0.000232041
DKK1	370.595	0.910859	0.156705	5.81258	6.15187e-09	1.95592e-07
SCG5	1035.75	0.908117	0.119563	7.59532	3.07027e-14	2.38351e-12
CD59	425.109	0.906903	0.142235	6.37607	1.8169e-10	7.84679e-09
HTR2B	44.1372	0.906197	0.221416	4.09274	4.26303e-05	0.000527962
HEY1	386.968	0.905427	0.140152	6.46033	1.04473e-10	4.80725e-09
ITGA3	32.8461	0.901875	0.222958	4.04505	5.23121e-05	0.000631638
C8orf44	42.1691	0.900417	0.220433	4.08477	4.41211e-05	0.00054363
VIM	3328.25	0.899688	0.121099	7.42939	1.09099e-13	8.02642e-12
HTR2C	72.5553	0.899374	0.210255	4.27754	1.88966e-05	0.000265982
ELMO1	116.803	0.896551	0.19778	4.53307	5.81335e-06	9.56595e-05
FZD5	94.8442	0.895587	0.205094	4.36672	1.26127e-05	0.000187545
PLK2	863.012	0.89513	0.121186	7.3864	1.50861e-13	1.08465e-11
CYFIP2	232.161	0.892733	0.166164	5.37259	7.76143e-08	2.06748e-06
ISLR2	80.3745	0.891238	0.212695	4.19021	2.78695e-05	0.000371222
FAM214B	166.647	0.890833	0.17357	5.13243	2.8603e-07	6.59276e-06
AMPD3	101.34	0.8891	0.19758	4.49996	6.79667e-06	0.000109981
TEAD2	48.2841	0.888284	0.217786	4.07869	4.52896e-05	0.000556402
IL20RA	37.6666	0.886475	0.222739	3.97987	6.89516e-05	0.000800543
MYO6	34.049	0.883994	0.223011	3.9639	7.37337e-05	0.000845132
FIG4	119.833	0.883113	0.194864	4.53194	5.84437e-06	9.59205e-05
GREM1	95.7209	0.883017	0.197311	4.47526	7.63194e-06	0.000120718
PAK1	182.244	0.881156	0.172585	5.10564	3.2967e-07	7.53005e-06
CELF3	333.467	0.879712	0.166712	5.27684	1.3143e-07	3.29984e-06
LOC100134229	104.389	0.878474	0.196109	4.47953	7.48085e-06	0.000118477
LMO4	760.294	0.877421	0.131456	6.67465	2.47816e-11	1.24439e-09
EPHX2	472.4	0.876861	0.13645	6.42623	1.30806e-10	5.84881e-09
ISLR	250.637	0.876329	0.166681	5.25753	1.46002e-07	3.62256e-06
CLSTN3	212.825	0.875939	0.183486	4.77387	1.80718e-06	3.38285e-05
PTPRM	54.5213	0.875924	0.216681	4.04246	5.28943e-05	0.000636719
LOC100130417	280.926	0.874143	0.155801	5.61062	2.016e-08	5.9515e-07
PREX1	334.306	0.873313	0.15388	5.67529	1.38457e-08	4.22177e-07
CXCL12	36.615	0.872856	0.222692	3.91957	8.87063e-05	0.000991598
NRXN1	224.316	0.872093	0.160287	5.44082	5.30351e-08	1.45261e-06
AOX1	98.9755	0.871839	0.195517	4.45914	8.22892e-06	0.000128395
C5orf4	113.241	0.871264	0.189748	4.59169	4.39676e-06	7.43805e-05
MAGED2	5191.4	0.870636	0.108346	8.0357	9.3043e-16	8.91944e-14
AHNAK2	284.372	0.870381	0.16375	5.31531	1.06473e-07	2.74402e-06
TRANK1	79.7654	0.869363	0.215548	4.03327	5.5006e-05	0.000657728
REC8	316.3	0.868632	0.183876	4.72401	2.31242e-06	4.16236e-05
PPM1K	77.0789	0.867592	0.207428	4.18262	2.88167e-05	0.000381429
WNT5B	23.6296	0.867527	0.221546	3.91578	9.0111e-05	0.00100359
TRIL	29.495	0.866034	0.222538	3.89162	9.95778e-05	0.0010919
TAGLN3	235.991	0.865995	0.163235	5.30521	1.12542e-07	2.88281e-06
GAB1	94.8372	0.864859	0.199761	4.32947	1.49472e-05	0.000216162
SLC22A17	374.031	0.863004	0.172493	5.00312	5.64103e-07	1.20171e-05
APH1B	164.136	0.862688	0.182707	4.7217	2.3388e-06	4.1979e-05
SLC35F1	128.007	0.862395	0.187533	4.59863	4.25279e-06	7.22346e-05
SOWAHA	142.613	0.862107	0.181992	4.73706	2.16843e-06	3.9255e-05
SIPA1L2	238.257	0.86135	0.165559	5.20269	1.96425e-07	4.68973e-06
ANKRD6	44.0415	0.860607	0.22071	3.89927	9.64836e-05	0.00106073
NRXN2	68.3594	0.860467	0.208642	4.12412	3.72151e-05	0.000471391
FUCA1	50.4403	0.85971	0.217815	3.94697	7.91474e-05	0.000896014
RASAL2	60.4024	0.858121	0.213192	4.02511	5.69493e-05	0.000676201
LUM	152.293	0.855942	0.190718	4.488	7.1894e-06	0.000115158
C7orf58	46.8236	0.854785	0.21975	3.88981	0.000100323	0.00109817
IFI30	66.1647	0.854529	0.210312	4.06315	4.84144e-05	0.000588507
LRRC4C	44.5715	0.85404	0.220715	3.86943	0.000109091	0.00118201
SYT17	69.4193	0.853131	0.208145	4.09872	4.15435e-05	0.000518962
RAMP2	35.3164	0.853092	0.222664	3.8313	0.000127466	0.00135089
YPEL3	129.362	0.852288	0.186368	4.57315	4.80447e-06	8.05242e-05
IDUA	31.2352	0.849265	0.222973	3.80882	0.00013963	0.00145662
TSPYL2	506.745	0.849093	0.131613	6.45145	1.10786e-10	5.04274e-09
ENO3	54.52	0.84894	0.217034	3.91155	9.1706e-05	0.00101604
FAM126A	110.976	0.84615	0.200852	4.2128	2.52227e-05	0.000342455
RAB9B	45.5892	0.844927	0.219491	3.84949	0.000118363	0.0012649
JAK3	57.5742	0.844639	0.215254	3.92392	8.71191e-05	0.000976443
CNGB1	616.597	0.844054	0.147623	5.71763	1.08023e-08	3.33396e-07
ABCC6	54.3767	0.842644	0.217923	3.8667	0.000110317	0.00119242
FAM174B	63.358	0.837655	0.213791	3.9181	8.92501e-05	0.000995918
YPEL5	486.574	0.837136	0.133628	6.26467	3.73625e-10	1.5105e-08
SLC17A8	33.8448	0.836362	0.222998	3.75054	0.000176457	0.00178488
IRF9	56.8327	0.835964	0.217106	3.85049	0.000117881	0.00126091
ATP9A	376.765	0.835792	0.14332	5.83167	5.48768e-09	1.77146e-07
LOC729177	178.426	0.835701	0.174444	4.79066	1.6623e-06	3.16311e-05
DUSP2	32.8063	0.835648	0.222976	3.7477	0.00017846	0.00180226
C1orf114	50.1826	0.834904	0.219066	3.81119	0.0001383	0.00144512
PTGER3	219.683	0.832959	0.174465	4.77436	1.8028e-06	3.38285e-05
GPR155	317.153	0.832916	0.150041	5.55124	2.83646e-08	8.13892e-07
DGKG	663.424	0.832408	0.130355	6.38567	1.70645e-10	7.42044e-09
SLC6A17	120.818	0.832039	0.195943	4.24632	2.17308e-05	0.000300198
SLC9A3	60.3445	0.830515	0.216416	3.83759	0.000124248	0.00132009
SH3PXD2A	446.341	0.828721	0.156839	5.28389	1.26472e-07	3.20477e-06
FLT1	49.9006	0.827921	0.217529	3.80603	0.000141216	0.00146953
GOLGA8A	308.6	0.82583	0.165233	4.99796	5.79393e-07	1.22808e-05
YPEL1	96.9825	0.8253	0.196743	4.19481	2.73098e-05	0.000364919
KIF13A	48.8925	0.825154	0.218866	3.77013	0.000163162	0.00166638
SORL1	645.331	0.825122	0.134695	6.12584	9.02037e-10	3.40727e-08
LOC100505678	376.19	0.824466	0.152114	5.42004	5.95854e-08	1.61801e-06
CES3	82.7779	0.823137	0.202442	4.06603	4.78214e-05	0.000582725
RIMKLB	73.9934	0.822962	0.208066	3.95529	7.64434e-05	0.000871455
AACSP1	179.674	0.821538	0.174201	4.71605	2.40472e-06	4.30401e-05
SLC25A27	27.2153	0.820108	0.222587	3.68443	0.000229215	0.00223631
EMILIN3	39.3963	0.819221	0.222005	3.6901	0.000224163	0.00219208
ARHGEF3	97.15	0.818916	0.195916	4.17993	2.91593e-05	0.000385561
F10	28.428	0.818745	0.222812	3.67461	0.000238216	0.00231156
LTK	379.865	0.81825	0.154661	5.29059	1.21923e-07	3.09801e-06
PLAG1	54.5153	0.817323	0.219548	3.72275	0.000197066	0.00196043
GPRASP1	81.1766	0.817127	0.20275	4.03021	5.57262e-05	0.000663991
SEMA6C	39.2771	0.814455	0.222865	3.65447	0.000257714	0.00246307
STARD8	33.9325	0.81264	0.22304	3.64347	0.000268992	0.00255734
CNN2	126.393	0.810924	0.188158	4.30981	1.63396e-05	0.000233366
RAPGEF4	117.178	0.808976	0.189848	4.26117	2.03357e-05	0.000283089
WDR86	41.9404	0.807246	0.222371	3.63017	0.000283232	0.00267464
SLC26A1	26.7486	0.805127	0.222337	3.6212	0.000293237	0.00275473
DUSP9	46.9941	0.804498	0.221361	3.63433	0.000278703	0.00263384
COL6A1	357.77	0.803634	0.172053	4.67086	2.99943e-06	5.30096e-05
CPT1A	611.285	0.802596	0.12699	6.32015	2.61309e-10	1.07357e-08
MCART6	71.6177	0.802378	0.208322	3.85163	0.000117336	0.00125828
SEMA3E	244.14	0.802219	0.162634	4.93266	8.11193e-07	1.65295e-05
SCUBE1	202.407	0.800984	0.182365	4.39221	1.12205e-05	0.000168627
NCALD	428.671	0.800245	0.160108	4.99816	5.78808e-07	1.22808e-05
PCDHB3	52.3201	0.798565	0.217317	3.67466	0.000238164	0.00231156
S100A13	39.1209	0.797984	0.221564	3.6016	0.000316266	0.00293299
MBNL2	682.307	0.797806	0.13563	5.88224	4.04754e-09	1.34077e-07
SYNDIG1	70.1701	0.797726	0.21363	3.73415	0.000188354	0.00188861
SDSL	74.0284	0.796196	0.210377	3.78461	0.000153947	0.00158894
RAB3IP	27.8046	0.79385	0.221599	3.58237	0.000340488	0.00311986
NFATC4	1234.55	0.793169	0.111547	7.11065	1.15499e-12	7.19963e-11
QSOX1	277.939	0.793114	0.160645	4.93705	7.93124e-07	1.62398e-05
PTGER1	156.867	0.792437	0.177554	4.46307	8.0795e-06	0.000126846
AQP6	55.9208	0.792433	0.221132	3.58354	0.000338975	0.00310825
KCNQ2	518.313	0.791872	0.14077	5.62529	1.85193e-08	5.54003e-07
NT5E	2038.89	0.791189	0.112983	7.00271	2.51059e-12	1.49854e-10
NYNRIN	267.516	0.791065	0.168914	4.68324	2.8238e-06	5.01156e-05
UBE2QL1	295.58	0.789467	0.165397	4.77316	1.8136e-06	3.38985e-05
PAK7	28.2712	0.787796	0.222917	3.53403	0.000409272	0.00361657
PLCXD3	326.966	0.787116	0.150159	5.24188	1.5895e-07	3.89798e-06
NIPAL3	155.317	0.786938	0.182341	4.31574	1.59072e-05	0.000228738
STK32B	32.4778	0.786353	0.222949	3.52705	0.000420214	0.00369519
RASSF4	38.5594	0.785828	0.221977	3.54013	0.000399937	0.00354646
ECI2	75.8259	0.785673	0.208262	3.77253	0.0001616	0.00165411
ARHGAP18	31.1975	0.783747	0.222948	3.51537	0.00043914	0.00383153
THNSL2	45.5721	0.783663	0.221157	3.54347	0.000394901	0.00350672
CPT1C	217.663	0.78278	0.170556	4.58957	4.44159e-06	7.50386e-05
NIPSNAP3A	338.323	0.78219	0.155774	5.02132	5.13181e-07	1.11386e-05
DNAH2	126.404	0.777876	0.185209	4.2	2.66914e-05	0.000358548
MAPK10	102.503	0.777789	0.194977	3.98913	6.63157e-05	0.000773419
C14orf132	3243.52	0.777362	0.115882	6.70821	1.97022e-11	1.00125e-09
MDFI	72.3914	0.777252	0.214169	3.62915	0.000284361	0.0026813
UBE2H	1178.26	0.777179	0.121915	6.37475	1.83257e-10	7.88753e-09
TEP1	113.738	0.776982	0.193011	4.02559	5.68335e-05	0.000675913
SESN3	931.002	0.776794	0.138939	5.59091	2.25885e-08	6.58651e-07
PBXIP1	243.589	0.776724	0.155227	5.0038	5.62113e-07	1.19949e-05
MGC21881	218.783	0.776494	0.161235	4.81593	1.46518e-06	2.82628e-05
FBXO32	49.6438	0.775054	0.217351	3.56591	0.000362594	0.003268
IGLON5	41.5886	0.7749	0.223017	3.47462	0.000511569	0.00432468
AMY2B	101.767	0.77467	0.196311	3.94613	7.94242e-05	0.000898153
KIFAP3	539.892	0.774234	0.129659	5.97129	2.35391e-09	8.19835e-08
EXOC3L1	95.2145	0.773933	0.198435	3.90019	9.61164e-05	0.00105761
EIF4E3	192.7	0.773845	0.170288	4.54433	5.511e-06	9.09207e-05
MYO1E	38.8444	0.773492	0.222961	3.46918	0.000522048	0.00439388
BBC3	242.838	0.77346	0.171743	4.50358	6.68181e-06	0.000108539
LINC00277	135.599	0.772354	0.183425	4.21075	2.54527e-05	0.000344838
LRP1	130.844	0.772266	0.208595	3.70222	0.000213718	0.00209968
USP35	184.633	0.771073	0.169489	4.5494	5.37995e-06	8.91071e-05
FAM123C	73.3436	0.770827	0.205752	3.74638	0.000179404	0.00181035
B4GALNT3	24.7547	0.770231	0.221507	3.47723	0.000506614	0.00429671
PCDHA3	101.302	0.769563	0.194297	3.96075	7.4716e-05	0.000854843
MCF2L	718.572	0.769091	0.127443	6.03478	1.59183e-09	5.75517e-08
SESN1	378.963	0.768796	0.143938	5.34116	9.23521e-08	2.39964e-06
ING4	260.001	0.767935	0.155612	4.93492	8.0183e-07	1.63651e-05
GUCY1A2	53.6694	0.767719	0.21746	3.5304	0.000414937	0.00365902
PARVA	917.783	0.76754	0.125462	6.11771	9.4927e-10	3.56441e-08
C20orf194	398.24	0.767231	0.149054	5.14734	2.64202e-07	6.15692e-06
NPY	120.614	0.766841	0.204213	3.7551	0.00017327	0.00175545
GALNT10	96.4992	0.766507	0.195936	3.91203	9.15234e-05	0.00101502
KCTD16	22.6882	0.7661	0.219905	3.48377	0.000494408	0.00421579
ZNF697	318.189	0.765981	0.152725	5.01544	5.29126e-07	1.14617e-05
SH3BP5	29.665	0.765739	0.223015	3.43357	0.000595678	0.00488193
PVRL2	255.541	0.765404	0.173021	4.42376	9.69987e-06	0.000148061
DAAM1	163.975	0.76175	0.173892	4.38058	1.18364e-05	0.000177042
LOC642852	415.546	0.761477	0.149239	5.1024	3.35371e-07	7.6327e-06
GOLGB1	1373.5	0.76111	0.116363	6.5408	6.11899e-11	2.96665e-09
ZNF763	30.9859	0.761003	0.223006	3.41248	0.00064374	0.00523179
PLEKHH1	104.993	0.759276	0.198993	3.81559	0.00013586	0.00142518
BLK	60.5079	0.758464	0.215764	3.51524	0.000439351	0.00383153
SLC12A6	202.704	0.756042	0.168592	4.48444	7.3106e-06	0.000116656
CNTN5	82.7693	0.75487	0.205791	3.66814	0.000244322	0.00235824
HECA	40.3105	0.752275	0.222259	3.38468	0.000712603	0.00570714
BTN2A2	77.9793	0.752026	0.20468	3.67416	0.000238631	0.00231212
ZNF610	99.4593	0.751352	0.204151	3.68037	0.000232893	0.00226775
RAB40B	255.312	0.751293	0.157783	4.76157	1.92097e-06	3.56468e-05
ADCY6	339.824	0.749509	0.149257	5.02161	5.12408e-07	1.11386e-05
MOCS1	86.9591	0.747895	0.200364	3.73269	0.000189446	0.00189656
LRRN2	234.187	0.747086	0.179078	4.17185	3.02133e-05	0.000395775
EBF4	45.6264	0.746216	0.22183	3.36391	0.00076848	0.00608532
SPEF2	29.4393	0.745789	0.222951	3.34508	0.000822584	0.00640947
ABCD1	149.977	0.744162	0.198497	3.74898	0.000177555	0.00179455
CCDC112	348.173	0.743622	0.155635	4.77797	1.77071e-06	3.34427e-05
ADAM32	192.029	0.743286	0.171446	4.33539	1.45502e-05	0.000212117
EXOC6B	68.5395	0.742917	0.21188	3.5063	0.000454376	0.00393978
ATP2B3	63.0361	0.74142	0.218913	3.38682	0.000707088	0.00567015
PNRC1	828.644	0.740919	0.216916	3.4157	0.000636186	0.00517704
ZMAT4	434.133	0.740821	0.143822	5.15098	2.59134e-07	6.05668e-06
ZFYVE1	176.567	0.740205	0.178204	4.1537	3.27147e-05	0.000421989
PLA2G16	59.5535	0.740123	0.212762	3.47865	0.000503947	0.00427983
C17orf28	51.7882	0.739622	0.218908	3.37868	0.000728338	0.00581842
NAP1L3	270.631	0.739092	0.159162	4.64366	3.42293e-06	5.96608e-05
DNAH5	48.2457	0.738949	0.220335	3.35375	0.000797238	0.006266
DEPTOR	773.963	0.738825	0.122538	6.02938	1.64592e-09	5.92105e-08
TAGLN2	406.256	0.738254	0.15117	4.88359	1.04174e-06	2.0924e-05
EHHADH	155.717	0.737564	0.180003	4.09752	4.17601e-05	0.00052053
ZBTB22	177.102	0.73666	0.171146	4.30427	1.67539e-05	0.000237939
CXADR	317.696	0.736617	0.162068	4.54511	5.49073e-06	9.07046e-05
CACNA1B	211.582	0.736264	0.180233	4.08506	4.40661e-05	0.000543591
PRRX2	21.3111	0.732412	0.219772	3.3326	0.000860392	0.00663866
PLIN5	58.18	0.731734	0.215153	3.40099	0.000671429	0.00540819
PTGR1	39.4963	0.731447	0.221594	3.30084	0.000963965	0.00726938
WDR78	30.8793	0.730516	0.223002	3.27582	0.00105355	0.00782373
HIST1H1T	159.914	0.730105	0.181544	4.02163	5.77969e-05	0.000684796
PLEKHM1P	120.064	0.729389	0.197703	3.68933	0.000224849	0.0021971
PPL	67.0216	0.729344	0.211801	3.44353	0.00057417	0.00473017
PCDHB8	121.73	0.728659	0.196349	3.71103	0.000206414	0.00203424
ANKRA2	183.539	0.727534	0.175969	4.13444	3.55825e-05	0.000454809
PCMTD1	539.346	0.7271	0.137892	5.27296	1.34242e-07	3.36376e-06
ADAMTS4	48.1547	0.72553	0.220817	3.28566	0.00101744	0.00760466
CHURC1	325.011	0.725387	0.154989	4.68026	2.86511e-06	5.07775e-05
ISYNA1	307.684	0.725268	0.160153	4.52858	5.93802e-06	9.73312e-05
SRGAP3	76.9343	0.725243	0.208777	3.47376	0.000513216	0.00433527
MB21D2	58.02	0.724288	0.214403	3.37816	0.000729713	0.00582574
DIRC3	43.7465	0.722801	0.220574	3.27691	0.0010495	0.00780368
GLDN	28.9562	0.72276	0.222337	3.25074	0.00115104	0.00841258
BCL2	890.894	0.722315	0.124734	5.79082	7.00416e-09	2.20474e-07
SLC12A7	221.897	0.720668	0.168621	4.27389	1.9209e-05	0.000269778
LOC100131434	30.4184	0.719226	0.222853	3.22735	0.00124944	0.00895772
PCDHGA11	45.5739	0.719188	0.221929	3.24062	0.0011927	0.00862427
PAIP2B	71.1441	0.718938	0.214803	3.34696	0.000817026	0.00638583
ACSF2	30.7398	0.717956	0.223057	3.21871	0.00128767	0.00913866
KCNH5	109.358	0.717405	0.201285	3.56412	0.000365078	0.0032857
ANK3	191.877	0.716825	0.169966	4.21747	2.47056e-05	0.000336518
PCDHB11	47.0202	0.716492	0.22181	3.23021	0.001237	0.00888872
LOX	59.0168	0.71486	0.214022	3.34012	0.000837411	0.00649301
HOGA1	92.9836	0.714683	0.200199	3.56986	0.000357173	0.00323064
NEDD4L	180.833	0.714535	0.175315	4.07572	4.58714e-05	0.00056137
GJD2	38.7686	0.714185	0.222576	3.20872	0.00133327	0.00939899
NFAM1	49.0446	0.714062	0.221332	3.2262	0.00125445	0.00896828
SAMD4A	23.1478	0.713786	0.22091	3.23111	0.0012331	0.00887576
FZD1	79.7159	0.71346	0.206426	3.45625	0.000547752	0.00455105
WIPI1	97.7454	0.713268	0.203431	3.50619	0.000454566	0.00393978
DNAJC22	47.152	0.713089	0.220395	3.2355	0.00121428	0.00876528
SPINK5	60.5841	0.712727	0.213649	3.33597	0.000850036	0.00657881
SERPINE2	91.8153	0.712692	0.204549	3.48421	0.000493598	0.00421457
CREG1	698.898	0.711649	0.128362	5.54408	2.95506e-08	8.42193e-07
C12orf68	30.0021	0.711358	0.223017	3.18971	0.00142418	0.00991404
RABEP2	158.285	0.71125	0.177427	4.00868	6.10586e-05	0.000718731
TPBG	37.1324	0.711173	0.222311	3.19901	0.00137902	0.00966805
RASA4	72.1106	0.711166	0.212754	3.34267	0.000829763	0.00644952
MXD4	1626.06	0.710837	0.11006	6.45864	1.0565e-10	4.84384e-09
RPS6KA5	132.547	0.710369	0.184425	3.8518	0.000117253	0.00125828
SPSB1	42.8927	0.709978	0.222166	3.19571	0.00139487	0.00975176
SH3BGRL2	284.311	0.708173	0.154022	4.59786	4.26859e-06	7.23089e-05
CHST8	633.651	0.708114	0.14446	4.9018	9.49648e-07	1.91962e-05
HOXD13	38.4445	0.707406	0.222103	3.18504	0.00144734	0.0100575
GPR173	188.6	0.706438	0.17751	3.9797	6.90025e-05	0.000800543
CTSO	55.4436	0.705144	0.21577	3.26804	0.00108296	0.00798587
TRIM36	179.588	0.703738	0.180953	3.88907	0.00010063	0.00109879
ZNF323	126.884	0.703692	0.184463	3.81481	0.000136288	0.00142764
CNTNAP3	115.98	0.703417	0.197496	3.56168	0.000368483	0.00331399
SULT4A1	260.009	0.703283	0.167005	4.21115	2.54078e-05	0.000344599
MYLIP	98.8976	0.703092	0.193709	3.62963	0.000283826	0.00267825
NEGR1	38.6115	0.7	0.221919	3.1543	0.00160884	0.0109748
GPC2	200.37	0.699903	0.171334	4.08501	4.4075e-05	0.000543591
C11orf9	93.6311	0.699577	0.202325	3.45768	0.000544843	0.00454163
SOCS3	33.8836	0.69938	0.222946	3.13699	0.00170692	0.0115321
ERMP1	169.998	0.699053	0.171721	4.07086	4.68397e-05	0.000572666
KCNMA1	112.017	0.698605	0.188886	3.69856	0.000216829	0.00212859
SPAG6	34.2601	0.698287	0.222888	3.1329	0.00173088	0.0116503
SYBU	617.218	0.697731	0.129025	5.40771	6.3836e-08	1.71868e-06
FAM115A	1925.96	0.697451	0.10684	6.52798	6.66613e-11	3.20735e-09
RCBTB2	110.687	0.696221	0.195957	3.55292	0.000380976	0.00340939
FAM114A1	31.6506	0.696092	0.223057	3.12069	0.00180427	0.0120481
OCA2	23.2484	0.695693	0.21978	3.1654	0.00154868	0.0106563
PIK3AP1	84.7637	0.695649	0.205057	3.39246	0.000692685	0.00556658
SYT3	37.3258	0.695396	0.222778	3.12147	0.00179949	0.0120262
DGAT2	71.6534	0.694023	0.208176	3.33383	0.000856582	0.00662137
CD97	116.196	0.693797	0.199466	3.47827	0.000504665	0.00428305
SMAD7	383.555	0.693787	0.145313	4.77444	1.80204e-06	3.38285e-05
GOLGA8B	152.84	0.692994	0.186543	3.71492	0.000203268	0.00200792
LACTB	125.278	0.691751	0.191914	3.60449	0.000312772	0.00291733
KCNAB1	714.958	0.6916	0.126655	5.46049	4.74835e-08	1.30906e-06
DNAJB5	216.755	0.691242	0.164361	4.20562	2.60367e-05	0.000351996
SNORD116-21	273.614	0.691233	0.173086	3.99358	6.50829e-05	0.000760442
BRSK2	117.18	0.6909	0.193241	3.57533	0.000349787	0.00318383
CD55	175.31	0.69018	0.178878	3.85838	0.000114139	0.00123236
EFEMP2	146.653	0.689563	0.178916	3.85411	0.00011615	0.00125056
LONRF2	563.149	0.68882	0.131815	5.22565	1.73541e-07	4.20688e-06
MEIS3P1	30.726	0.68791	0.223064	3.08391	0.00204298	0.0133602
DAB2IP	554.146	0.687717	0.162064	4.24348	2.20078e-05	0.000303033
SDCBP	472.295	0.686622	0.137805	4.98257	6.2744e-07	1.32107e-05
ZNF558	193.73	0.685849	0.167488	4.09491	4.22338e-05	0.000524462
CMAHP	69.7385	0.685328	0.207761	3.29864	0.000971557	0.00731356
PLCXD2	40.9565	0.684407	0.222896	3.07052	0.00213686	0.0138666
AGPAT4	375.099	0.684355	0.144647	4.73121	2.23182e-06	4.02874e-05
SDC4	136.321	0.683737	0.181186	3.77367	0.000160866	0.00164959
AK4	49.9819	0.683625	0.21847	3.12914	0.00175318	0.0117691
ZNF525	87.0993	0.683431	0.203073	3.36544	0.000764224	0.00606681
FGFR2	31.8592	0.682365	0.223061	3.0591	0.00222001	0.0142816
MFI2	85.6025	0.68194	0.209221	3.25942	0.00111638	0.0081894
ZNF836	72.185	0.681825	0.208916	3.26364	0.00109992	0.00809205
KIAA1024	574.609	0.68158	0.140606	4.84745	1.25057e-06	2.44585e-05
CA5B	70.3072	0.681208	0.208189	3.27207	0.00106762	0.00790498
KCNH3	30.0153	0.680932	0.222376	3.06207	0.00219812	0.0141807
PGAP3	108.161	0.680464	0.194618	3.49641	0.000471562	0.00404552
ARHGAP26	207.442	0.679748	0.164743	4.12612	3.68938e-05	0.000468729
C6orf170	240.176	0.679486	0.172556	3.93777	8.22418e-05	0.000927486
REEP6	96.0796	0.679349	0.205564	3.30481	0.000950421	0.00719727
CDC14B	360.991	0.679224	0.147308	4.6109	4.00926e-06	6.85583e-05
EFNA1	79.5244	0.679055	0.205547	3.30364	0.000954381	0.00722293
ARHGAP32	38.8801	0.678159	0.221754	3.05816	0.00222704	0.0143196
TAGLN	19.0539	0.677536	0.218127	3.10615	0.00189542	0.0125377
MSX1	28.1204	0.675954	0.222081	3.04372	0.00233671	0.0148886
TMEM45A	33.5003	0.67572	0.222996	3.03019	0.00244403	0.0154634
CRB2	27.8771	0.67487	0.221442	3.04762	0.00230659	0.0147263
ABLIM2	92.1993	0.674643	0.197734	3.41186	0.000645201	0.00524029
PBX1	249.972	0.674452	0.161742	4.16993	3.04694e-05	0.000397485
FAM134B	229.286	0.673384	0.170378	3.95229	7.74083e-05	0.000880867
PLA2G12A	329.443	0.673176	0.148821	4.52338	6.08596e-06	9.94984e-05
PARM1	888.787	0.672011	0.124257	5.40823	6.36509e-08	1.71868e-06
ATRNL1	352.334	0.671681	0.146917	4.57183	4.83475e-06	8.08176e-05
ZFYVE28	45.3879	0.671594	0.220067	3.05177	0.002275	0.014554
KLC4	222.919	0.671139	0.16885	3.97476	7.04499e-05	0.000811168
EFNB3	89.1195	0.670062	0.200028	3.34984	0.000808568	0.00633145
CSRP1	229.02	0.669834	0.169345	3.95543	7.63978e-05	0.000871455
GXYLT2	48.8391	0.66979	0.219859	3.04646	0.00231556	0.0147687
DLG4	74.6848	0.66832	0.207129	3.22658	0.00125279	0.00896649
PRDM8	54.4853	0.668083	0.217158	3.07649	0.00209454	0.0136409
SLIT1	33.3155	0.668045	0.22301	2.99559	0.00273916	0.016941
ZNF606	230.554	0.665701	0.15836	4.20372	2.62559e-05	0.000354203
SH3BGRL	243.023	0.665106	0.166449	3.99586	6.44592e-05	0.000753851
MARCH4	115.092	0.662021	0.190998	3.46612	0.000528037	0.00443089
PLD5	29.0986	0.662003	0.222674	2.97297	0.00294937	0.0179516
ZNF528	314.287	0.661559	0.14743	4.48728	7.21385e-06	0.000115403
GRIP2	71.1142	0.661065	0.208889	3.16467	0.00155261	0.0106775
SLAIN1	230.654	0.659155	0.168999	3.90034	9.6057e-05	0.00105761
FOXO3	1107.03	0.658371	0.13057	5.0423	4.59974e-07	1.01403e-05
SLITRK6	283.286	0.658028	0.165467	3.9768	6.985e-05	0.000805897
KCNB2	57.968	0.657433	0.214336	3.0673	0.00216001	0.0139953
ST8SIA2	289.668	0.656713	0.155559	4.22163	2.42539e-05	0.000331078
GBGT1	110.467	0.656538	0.192589	3.40901	0.000651989	0.00528524
AKAP6	296.251	0.656436	0.156689	4.18942	2.79666e-05	0.000372124
ID4	45.3813	0.655552	0.221596	2.95831	0.00309328	0.0185843
SLC4A3	96.5269	0.655183	0.201235	3.25581	0.00113071	0.00828011
TGFB1	49.2374	0.654905	0.223115	2.93528	0.00333249	0.0198164
PCDHA6	29.7123	0.654836	0.22294	2.93727	0.00331115	0.0197173
NAT1	44.1013	0.65455	0.220345	2.97057	0.00297249	0.018038
LOC388849	108.889	0.654348	0.198106	3.30303	0.000956473	0.0072258
ZNF577	191.635	0.652677	0.167886	3.88762	0.000101233	0.00110336
PDE11A	74.4056	0.652282	0.20995	3.10685	0.00189094	0.0125146
SMARCD3	150.836	0.65225	0.189432	3.44319	0.000574894	0.00473305
SEZ6L	458.4	0.651784	0.164039	3.97336	7.08662e-05	0.000815219
ABCG1	237.426	0.651072	0.16372	3.97675	6.98648e-05	0.000805897
SEMA7A	29.0142	0.65081	0.222926	2.91939	0.00350712	0.0206992
PPFIBP2	102.921	0.65073	0.199605	3.26009	0.00111378	0.00817502
APBB3	287.363	0.650439	0.150254	4.32892	1.49841e-05	0.000216449
HBP1	701.832	0.649878	0.13686	4.74847	2.04957e-06	3.74787e-05
FAT4	389.674	0.649834	0.152133	4.27149	1.94174e-05	0.000272101
ADAMTSL2	209.271	0.64977	0.170069	3.82063	0.000133109	0.00140013
CCT6B	45.0153	0.649275	0.219197	2.96206	0.00305584	0.0184136
CNTN2	55.3562	0.64921	0.218038	2.97751	0.00290603	0.0177647
KDM3A	352.741	0.648721	0.152219	4.26177	2.02816e-05	0.000282935
TRPM6	148.986	0.648703	0.184485	3.5163	0.000437604	0.0038242
AKAP12	5333.88	0.648512	0.104031	6.23383	4.55172e-10	1.81124e-08
LOC375295	62.0844	0.647378	0.211766	3.05704	0.00223533	0.0143656
C1orf9	1168.03	0.643568	0.120191	5.35454	8.57724e-08	2.25179e-06
PGF	231.321	0.64284	0.165496	3.88433	0.000102614	0.00111745
AP1G2	229.636	0.641556	0.170348	3.76614	0.000165788	0.00169184
LPPR4	738.709	0.641006	0.125431	5.11041	3.21455e-07	7.36902e-06
C20orf112	361.045	0.640664	0.156608	4.09088	4.29731e-05	0.000531496
TMSB4X	691.685	0.640454	0.133236	4.80692	1.53273e-06	2.94178e-05
TLE6	86.3945	0.640324	0.207433	3.08689	0.0020226	0.0132543
B4GALNT4	205.862	0.640037	0.169396	3.77835	0.000157869	0.00162385
ZDBF2	1418.28	0.6399	0.126004	5.07842	3.8058e-07	8.49358e-06
C10orf32	271.482	0.639836	0.152626	4.19219	2.76275e-05	0.000368386
ZNF181	326.792	0.639414	0.152517	4.1924	2.76017e-05	0.000368386
SLC12A8	61.7516	0.637725	0.213587	2.98579	0.00282845	0.0174336
MICAL1	961.791	0.637275	0.12687	5.02307	5.08518e-07	1.10945e-05
ARHGAP27	28.6194	0.63682	0.223042	2.85516	0.00430149	0.0244854
PDIA3P	63.373	0.635952	0.213458	2.97929	0.00288919	0.0176848
HTR3A	367.058	0.635654	0.145036	4.38275	1.17193e-05	0.000175498
SGIP1	150.55	0.635562	0.178165	3.56727	0.000360715	0.00325569
XYLT1	63.9888	0.634644	0.216361	2.93326	0.00335427	0.0199272
MAPK13	45.9558	0.634061	0.221474	2.86291	0.00419766	0.0239751
SWT1	96.2886	0.633622	0.196816	3.21936	0.00128476	0.00912482
NPR2	94.5299	0.631239	0.197891	3.18983	0.00142358	0.00991404
SEMA4F	88.8973	0.630718	0.203712	3.09613	0.00196064	0.0129201
TNFRSF19	107.718	0.630597	0.190741	3.30604	0.000946258	0.00718293
FAM124A	138.821	0.63017	0.194803	3.2349	0.00121684	0.0087787
SSTR1	23.809	0.629137	0.220964	2.84723	0.0044101	0.0249354
PLXNA4	1674.76	0.629126	0.149729	4.20177	2.64838e-05	0.000356516
SPAG1	59.1117	0.628084	0.211756	2.96607	0.00301632	0.0182354
NPC2	34.0862	0.62721	0.222929	2.81349	0.00490062	0.0270207
MARCH9	190.882	0.626782	0.171546	3.65372	0.000258463	0.00246837
RASA4P	33.3079	0.62668	0.223091	2.80908	0.00496829	0.0272513
LOC100270804	35.1458	0.625009	0.223088	2.80163	0.00508454	0.0277686
RAPGEF3	56.7603	0.623175	0.218081	2.85754	0.00426942	0.0243248
SERINC2	28.1186	0.62306	0.22265	2.79839	0.00513587	0.0279524
DPYSL4	290.31	0.621044	0.174862	3.55162	0.000382871	0.00342151
TSPAN31	186.575	0.620464	0.168954	3.67239	0.00024029	0.00232292
ADAMTS5	32.9678	0.620427	0.223067	2.78134	0.00541347	0.0291622
P2RX3	23.4396	0.619621	0.220399	2.81136	0.0049333	0.0271239
COL22A1	506.882	0.619238	0.143709	4.30898	1.64011e-05	0.000233979
MTMR7	241.954	0.619117	0.160586	3.85536	0.00011556	0.00124557
ITGA7	24.815	0.619048	0.222241	2.78549	0.00534474	0.0288657
EML2	129.551	0.618896	0.192119	3.22142	0.00127556	0.00908836
ZSCAN18	313.262	0.618307	0.157796	3.91839	8.91408e-05	0.000995576
SMAD6	1110.04	0.618238	0.118714	5.20777	1.91119e-07	4.58137e-06
BNIP3L	865.55	0.617987	0.127648	4.84133	1.28973e-06	2.51081e-05
DOCK5	147.467	0.617733	0.17658	3.49832	0.00046819	0.0040268
LACC1	26.7307	0.617194	0.22193	2.78103	0.00541859	0.0291774
ARSA	87.4304	0.617117	0.199697	3.09026	0.00199979	0.013132
SPOCK3	1262.43	0.616921	0.130213	4.73777	2.16084e-06	3.91738e-05
PCDHB2	242.545	0.61686	0.157724	3.911	9.19135e-05	0.00101604
ARL15	164.736	0.616857	0.190412	3.23958	0.00119704	0.00865069
PARP14	93.3595	0.615387	0.201381	3.05583	0.00224442	0.0144094
ZNF167	191.522	0.615142	0.179885	3.41965	0.000627016	0.00511558
FAM102B	162.748	0.614752	0.189812	3.23874	0.0012006	0.00867142
CD200	195.158	0.614691	0.173241	3.54818	0.000387903	0.00345671
SCN3B	1033.27	0.614628	0.138513	4.43732	9.10867e-06	0.000139624
ELAVL2	214.626	0.613447	0.175127	3.50286	0.000460284	0.00397844
STXBP5	1587.31	0.61316	0.114622	5.34943	8.82296e-08	2.30833e-06
PDCD4	1260.95	0.613131	0.117438	5.22088	1.78071e-07	4.30021e-06
INHA	27.3566	0.612896	0.222624	2.75306	0.00590416	0.0310168
STX7	332.154	0.612859	0.150665	4.0677	4.74804e-05	0.000579939
ZDHHC11	62.7542	0.611927	0.211995	2.88652	0.00389526	0.0224763
AKD1	52.9848	0.611549	0.216886	2.81968	0.00480722	0.0266101
MYLK	166.183	0.6115	0.188316	3.24719	0.00116549	0.00847186
GPR85	57.2391	0.611485	0.217304	2.81396	0.00489356	0.0270053
CUL7	565.17	0.6106	0.138386	4.41229	1.02283e-05	0.00015519
SEPSECS	198.438	0.610542	0.182616	3.34331	0.000827857	0.00643866
SRPK3	53.9509	0.610261	0.217155	2.81025	0.00495029	0.0271644
CRH	36.3359	0.610224	0.223047	2.73585	0.00622192	0.032307
MMP17	24.6616	0.609247	0.221834	2.74641	0.00602522	0.0315624
PTPN21	97.67	0.608356	0.200005	3.0417	0.00235246	0.0149739
ZNF699	52.8969	0.606971	0.218828	2.77373	0.00554175	0.0295264
ATP11A	368.465	0.606851	0.163277	3.71669	0.000201851	0.00199548
CLDN4	25.1061	0.606762	0.221352	2.74117	0.00612208	0.0319591
HOXC11	48.8394	0.606283	0.219186	2.76606	0.00567376	0.0300778
MIR143HG	73.3499	0.606074	0.209004	2.89982	0.00373372	0.0217927
DGKI	195.929	0.605128	0.179856	3.36452	0.000766778	0.00607565
ZNF233	95.3643	0.605042	0.199814	3.02803	0.00246154	0.0155431
TRO	1346.5	0.604748	0.117048	5.16665	2.38328e-07	5.60559e-06
TSPAN5	38.4821	0.604508	0.222124	2.72149	0.00649883	0.0334702
TRIM21	26.1154	0.604146	0.222167	2.71933	0.00654146	0.0336623
OTUD1	28.0301	0.603393	0.222895	2.70708	0.00678782	0.0345368
SRC	202.499	0.60325	0.182951	3.29733	0.000976072	0.00733881
RET	1928.25	0.603187	0.147382	4.09268	4.26408e-05	0.000527962
CADM4	89.0434	0.602986	0.202904	2.97178	0.00296078	0.0179864
PCDHB15	216.136	0.602964	0.166929	3.61211	0.000303718	0.00284054
PRKACB	823.631	0.602481	0.139709	4.3124	1.61491e-05	0.000231953
TMC6	119.957	0.601676	0.183933	3.27117	0.00107104	0.0079257
SYNJ2	79.2594	0.600453	0.20486	2.93105	0.00337822	0.0200558
PDE7B	24.9675	0.599343	0.221089	2.71086	0.00671081	0.0342276
S100A11	103.291	0.599112	0.210442	2.84692	0.00441449	0.0249379
PPM1H	20.6426	0.598119	0.219443	2.72563	0.00641796	0.0331211
MDK	1341.36	0.597805	0.140767	4.24676	2.1688e-05	0.000299935
TOM1L2	134.625	0.59716	0.186085	3.20908	0.00133162	0.00939784
CYP3A5	22.5006	0.59665	0.219849	2.71391	0.0066495	0.0340246
PROCR	40.2296	0.59623	0.221079	2.6969	0.00699876	0.0353683
TXNRD3	238.599	0.596046	0.162519	3.66754	0.000244896	0.00236198
NOTCH3	25.8157	0.59541	0.219449	2.7132	0.00666359	0.0340691
MFAP3L	55.2904	0.595396	0.215939	2.75724	0.00582913	0.0307213
GLRX	74.7698	0.595279	0.209415	2.84258	0.00447502	0.0251675
A2LD1	63.0303	0.595232	0.212538	2.80059	0.00510094	0.0278461
EFNA3	25.1153	0.594731	0.222352	2.67473	0.00747894	0.0373034
LMBR1L	304.628	0.594686	0.156167	3.808	0.000140093	0.00146024
NAV1	268.8	0.594272	0.179912	3.30313	0.000956119	0.0072258
LMO7	120.415	0.594252	0.18719	3.17459	0.00150049	0.0103699
ADCY1	644.511	0.594129	0.150454	3.94891	7.85091e-05	0.00089179
TMEM8B	39.2498	0.593941	0.223106	2.66214	0.00776455	0.0383799
RUFY3	2291.42	0.593637	0.12218	4.85871	1.1815e-06	2.33241e-05
ZNF75D	221.312	0.593453	0.171892	3.45248	0.000555458	0.00459697
WDR91	180.952	0.593423	0.175966	3.37237	0.000745254	0.00593857
LOC100506123	41.1732	0.593191	0.221638	2.67639	0.00744205	0.0372073
RUNDC3A	889.096	0.59299	0.129411	4.58221	4.60097e-06	7.75242e-05
OCIAD2	202.696	0.592943	0.169874	3.4905	0.000482124	0.00412495
ZNF883	188.651	0.592803	0.168255	3.52324	0.000426299	0.00373573
EMID1	34.9031	0.59249	0.223007	2.65682	0.00788815	0.0387788
LOC375190	48.0736	0.591794	0.219205	2.69973	0.00693965	0.0351539
TLE3	445.18	0.591556	0.176623	3.34926	0.000810277	0.00634091
ZNF846	36.6698	0.591449	0.222867	2.65382	0.00795865	0.0390495
LINC00340	34.4958	0.591098	0.223085	2.64965	0.00805751	0.0394276
CACNA2D2	688.535	0.591093	0.142449	4.14951	3.33193e-05	0.00042935
GATA6	120.037	0.591036	0.194078	3.04536	0.00232405	0.0148154
MAPT	478.095	0.590586	0.15376	3.84096	0.000122552	0.00130536
PTPRH	220.85	0.590306	0.193739	3.04691	0.00231203	0.0147536
ZNF589	149.699	0.590278	0.18389	3.20996	0.00132753	0.00937423
RHOBTB1	272.52	0.590114	0.171795	3.435	0.000592553	0.00486044
HIP1R	77.0315	0.588253	0.207849	2.83019	0.00465199	0.0259705
C14orf101	260.866	0.5882	0.156387	3.76118	0.000169117	0.00172164
PCDHB18	125.799	0.587019	0.187668	3.12796	0.00176025	0.011804
LINC00478	141.261	0.58677	0.182102	3.2222	0.0012721	0.0090688
RNPC3	262.301	0.586548	0.158258	3.70629	0.000210317	0.00206948
ABHD4	29.3766	0.585864	0.221893	2.6403	0.00828318	0.0403602
LOC155060	64.1975	0.585689	0.21183	2.76489	0.00569412	0.0301479
PCDHA9	57.7843	0.585029	0.214392	2.72878	0.00635695	0.0328196
EPB49	89.8566	0.584645	0.209184	2.79488	0.00519183	0.0281722
OGDHL	1322.42	0.584221	0.115805	5.04485	4.53876e-07	1.00233e-05
AKAP9	1756.95	0.584148	0.130536	4.47499	7.64156e-06	0.00012072
KGFLP2	39.4207	0.583912	0.222757	2.62129	0.00875964	0.0420025
STEAP3	191.366	0.582163	0.181037	3.21571	0.0013012	0.00921399
TEX22	60.3953	0.581494	0.214225	2.71441	0.00663945	0.0340041
SMTNL2	36.9798	0.581337	0.222204	2.61623	0.00889068	0.0425787
PDIA2	1303.87	0.581336	0.123142	4.72086	2.3485e-06	4.20934e-05
LOC100505761	76.8803	0.580515	0.210319	2.76017	0.00577716	0.0304793
ERBB2	77.1018	0.580398	0.205743	2.82098	0.00478771	0.0265253
AMOT	148.893	0.580226	0.182827	3.17363	0.00150543	0.0103983
COTL1	494.201	0.580082	0.150643	3.85071	0.000117776	0.00126086
ADM	82.6015	0.579857	0.204333	2.83781	0.00454249	0.0254677
SEZ6L2	724.162	0.579405	0.211571	2.73858	0.00617051	0.0321346
KCNC3	38.4763	0.579086	0.222824	2.59885	0.00935374	0.0442807
MFGE8	139.658	0.578759	0.189174	3.0594	0.00221783	0.0142816
TRAF3IP2	49.3391	0.577015	0.219329	2.63081	0.00851812	0.0412035
ARAP1	343.938	0.576935	0.16146	3.57324	0.000352596	0.00320298
PRKCA	629.767	0.57691	0.135984	4.24248	2.21059e-05	0.000304052
FAM117B	338.136	0.576803	0.163586	3.52598	0.000421914	0.003705
PPAPDC2	251.428	0.576777	0.15812	3.64772	0.000264582	0.0025211
VWDE	364.519	0.576735	0.156007	3.69684	0.000218296	0.00213968
SNORD116-18	161.27	0.576368	0.179668	3.20796	0.00133682	0.00941877
GTF2IRD2B	43.2446	0.576323	0.221112	2.60648	0.0091478	0.0434684
PAPSS2	24.5671	0.576307	0.221573	2.60098	0.00929573	0.0440555
NUDT10	55.2366	0.576072	0.214961	2.67989	0.00736455	0.0368871
CMTM3	227.897	0.575605	0.169455	3.39681	0.000681763	0.00548444
WDR31	34.4775	0.575168	0.222702	2.58268	0.00980365	0.0458785
ZFP2	32.2195	0.574141	0.222728	2.57776	0.00994422	0.0463819
AP5B1	65.1104	0.573427	0.210693	2.72162	0.00649619	0.0334702
LOC100131089	49.5961	0.571924	0.219748	2.60264	0.00925093	0.0438925
SYNGR3	48.2403	0.571632	0.21948	2.60448	0.00920141	0.0436903
NHLRC4	123.814	0.57157	0.186429	3.06589	0.00217025	0.0140473
ELN	144.416	0.571542	0.181366	3.15132	0.00162533	0.0110664
TGFBR1	1624.68	0.571354	0.124719	4.58115	4.62434e-06	7.78144e-05
SNORD89	46.3374	0.571218	0.222106	2.57183	0.0101163	0.0469422
NYAP1	88.4916	0.570757	0.20732	2.75302	0.00590481	0.0310168
COL5A2	82.162	0.570734	0.201369	2.83427	0.00459308	0.0256944
CREB3L4	555.573	0.570423	0.129175	4.41589	1.00593e-05	0.000152994
LOC146880	104.742	0.570394	0.198424	2.87462	0.0040451	0.0232455
ERMAP	82.5216	0.5702	0.203125	2.80714	0.0049984	0.0273956
PRSS30P	47.0535	0.569983	0.219053	2.60203	0.00926739	0.0439541
NCOA1	337.094	0.569008	0.154837	3.67487	0.000237968	0.00231156
STAT5A	61.0327	0.568891	0.212812	2.67321	0.00751293	0.0373994
HECW2	141.232	0.568883	0.182604	3.11539	0.00183701	0.0122088
TSPAN8	698.372	0.568576	0.147955	3.84289	0.000121594	0.00129735
SLC35E2	479.938	0.568093	0.14812	3.83535	0.000125387	0.00133001
GARNL3	557.006	0.566003	0.129528	4.36974	1.24394e-05	0.000185186
ST8SIA4	325.669	0.56586	0.15301	3.69819	0.000217146	0.00213005
HDAC6	448.285	0.565672	0.136059	4.15755	3.2168e-05	0.000417491
PCDHGA6	50.3516	0.565323	0.221457	2.55274	0.0106878	0.0489835
LOC284751	46.8601	0.564378	0.21936	2.57284	0.0100869	0.0468403
EPHB3	86.5766	0.564249	0.210555	2.67981	0.00736635	0.0368871
ADCY5	73.2328	0.563782	0.208072	2.70955	0.00673742	0.0343218
KIAA0913	284.807	0.563616	0.159846	3.526	0.000421885	0.003705
C4orf34	114.126	0.563033	0.191752	2.93626	0.00332199	0.0197725
KCTD21	76.0874	0.562797	0.211513	2.66082	0.00779507	0.0384557
ARHGEF17	665.405	0.562741	0.134773	4.17549	2.97347e-05	0.000391126
KSR1	61.5891	0.562595	0.214593	2.62168	0.00874963	0.0419863
SENP7	616.289	0.5624	0.14132	3.97964	6.90211e-05	0.000800543
CBFA2T2	750.39	0.56181	0.138146	4.06679	4.76658e-05	0.000581642
IL7	187.135	0.561702	0.173856	3.23085	0.00123424	0.00887898
MRC2	199.571	0.561411	0.169151	3.319	0.000903415	0.00692263
DDR1	415.79	0.561406	0.150123	3.73964	0.000184285	0.00185075
SMARCA1	1019.19	0.56095	0.115929	4.83874	1.30666e-06	2.53595e-05
NCKAP5L	314.898	0.560744	0.177383	3.16121	0.00157115	0.0107745
C11orf1	170.798	0.560032	0.170415	3.28628	0.0010152	0.00759239
LOC100287015	51.1212	0.559879	0.216353	2.58781	0.00965896	0.0453523
ZNF25	178.827	0.559783	0.175499	3.18967	0.00142435	0.00991404
AFAP1L1	77.0404	0.55963	0.202706	2.76079	0.00576615	0.0304594
KCNQ1OT1	871.292	0.558601	0.146717	3.80734	0.000140469	0.00146296
ZNF556	94.2151	0.55844	0.201572	2.77042	0.00559839	0.0297656
JAK2	71.3285	0.558152	0.20645	2.70357	0.00685998	0.0348396
RIC3	133.694	0.557816	0.185912	3.00043	0.00269599	0.0167275
CD44	305.457	0.557473	0.154884	3.5993	0.000319078	0.00294945
L3MBTL1	52.2366	0.557027	0.218496	2.54937	0.0107917	0.0492991
TM7SF2	203.724	0.556892	0.16561	3.36267	0.000771925	0.00610496
TFDP2	1268.02	0.556413	0.121684	4.57261	4.81687e-06	8.06252e-05
ZNF793	209.927	0.55618	0.176304	3.15466	0.00160683	0.010967
CCNL2	2963.32	0.556098	0.108489	5.12587	2.96167e-07	6.80164e-06
GABBR1	104.129	0.555955	0.192888	2.88226	0.0039483	0.0227513
KDM4A	525.702	0.555435	0.133096	4.1732	3.00357e-05	0.000394266
VLDLR	221.216	0.555134	0.167273	3.31872	0.000904307	0.00692263
NSUN5P1	191.917	0.55509	0.175925	3.15527	0.00160351	0.0109503
GRK5	422.349	0.554509	0.13638	4.0659	4.78466e-05	0.000582725
SNORD116-20	205.946	0.55422	0.178551	3.10399	0.00190932	0.0126099
HERC2P2	1174.02	0.552811	0.118339	4.67143	2.99114e-06	5.29368e-05
SNORD116-14	81.4881	0.552723	0.210817	2.62181	0.00874647	0.0419863
ZNF33B	841.127	0.552361	0.127858	4.3201	1.5596e-05	0.000224518
TPPP3	127.625	0.551753	0.192275	2.86959	0.00410998	0.0235435
SUOX	129.198	0.551607	0.183616	3.00414	0.00266333	0.0165611
FKBP1B	136.646	0.551233	0.185855	2.96593	0.0030177	0.0182354
LRRTM2	748.739	0.551017	0.132124	4.17045	3.04003e-05	0.000397402
ZNF596	91.6245	0.550787	0.19823	2.77852	0.00546067	0.0293166
AHCYL2	216.544	0.550772	0.16815	3.27548	0.00105483	0.00782861
PPARGC1A	211.502	0.550699	0.164566	3.34637	0.000818772	0.00638763
ARHGEF10L	142.056	0.55029	0.178551	3.08198	0.00205626	0.0134401
DNAJA4	105.85	0.55003	0.197376	2.78671	0.00532468	0.0287696
MEG3	3101.51	0.547695	0.123553	4.43287	9.29867e-06	0.00014228
DDX25	81.2758	0.547695	0.203559	2.69059	0.00713253	0.0359273
MAP6	474.438	0.546293	0.15567	3.50931	0.000449279	0.00390465
OBFC2A	111.611	0.546276	0.195564	2.79334	0.00521666	0.0282826
EVI5L	187.759	0.546112	0.172761	3.16109	0.00157181	0.0107745
HOOK2	213.163	0.545561	0.162696	3.35326	0.000798662	0.00627329
PCYT1B	71.051	0.544329	0.209824	2.59422	0.00948061	0.0446308
KIF13B	190.869	0.544068	0.166371	3.27021	0.00107466	0.0079432
SNORD114-13	85.4523	0.544022	0.204319	2.66261	0.00775372	0.0383708
DNAH10	75.3743	0.543569	0.212386	2.55935	0.0104868	0.0483074
OPRL1	204.582	0.543466	0.166463	3.26479	0.00109547	0.00806403
TBX20	685.058	0.543371	0.145675	3.73001	0.00019147	0.00191379
MMP2	3042.83	0.542618	0.143734	3.77516	0.000159902	0.00164104
MAP3K12	402.651	0.542341	0.138276	3.92216	8.77569e-05	0.000982722
PRPH	6863.61	0.542227	0.138283	3.92114	8.81314e-05	0.000986043
SMPD3	120.584	0.541883	0.193581	2.79926	0.005122	0.0279129
SNX22	103.89	0.541837	0.19527	2.77481	0.0055234	0.0294997
ANTXR1	252.554	0.54126	0.160237	3.37786	0.000730517	0.00582848
TSPYL1	1515.69	0.540094	0.111193	4.85726	1.19021e-06	2.33865e-05
RFTN1	262.403	0.539688	0.155935	3.46099	0.0005382	0.00450454
KIAA1377	88.5321	0.539462	0.20267	2.66178	0.00777291	0.0383913
PCLO	355.788	0.539056	0.150269	3.58728	0.000334144	0.00307063
ZNF667	214.691	0.538757	0.163925	3.28659	0.00101407	0.00759239
TPST2	217.716	0.538649	0.165428	3.25609	0.00112956	0.00827647
FBRS	91.426	0.538253	0.211193	2.54863	0.0108146	0.0493764
SHC1	3270.55	0.537587	0.120655	4.45558	8.3668e-06	0.000130226
OPRM1	223.747	0.53698	0.161794	3.31892	0.000903659	0.00692263
S1PR3	128.706	0.536711	0.185326	2.89604	0.00377898	0.0219859
SPATA7	268.628	0.534915	0.16185	3.305	0.000949764	0.00719659
TSC22D1	1944.05	0.534666	0.1061	5.03929	4.67269e-07	1.02832e-05
NAP1L5	376.214	0.534431	0.153908	3.47241	0.000515812	0.00435429
PRAME	291.154	0.532358	0.151634	3.51082	0.00044673	0.00388784
DISP1	69.1218	0.531676	0.207882	2.55759	0.0105401	0.0484646
PLCD4	449.703	0.531359	0.139731	3.80272	0.000143117	0.00148443
JAK1	643.252	0.530997	0.127251	4.17283	3.00841e-05	0.000394492
SIX4	87.8612	0.530974	0.200596	2.64698	0.00812133	0.0396479
ZNF10	221.348	0.530045	0.169131	3.13394	0.00172478	0.0116278
CYTH1	603.945	0.529246	0.128302	4.12501	3.70713e-05	0.000470512
LCP1	473.424	0.528792	0.138114	3.82867	0.000128838	0.00136087
PLAT	360.908	0.52851	0.141882	3.725	0.000195315	0.00194761
KLHL3	138.238	0.528067	0.190484	2.77224	0.00556716	0.0296493
GANC	121.144	0.52787	0.187768	2.81129	0.00493435	0.0271239
LOC100506548	1938.13	0.527754	0.111171	4.74724	2.06213e-06	3.75997e-05
PTPRB	231.275	0.527273	0.163881	3.21742	0.00129349	0.00917075
LOC150197	115.778	0.526438	0.186011	2.83015	0.00465269	0.0259705
PCDHB10	76.4139	0.526244	0.204257	2.57638	0.009984	0.0465142
SCN2A	127.071	0.526127	0.187209	2.81037	0.00494846	0.0271644
LOC149837	123.34	0.525777	0.187407	2.80553	0.00502333	0.0275055
SYNE1	381.436	0.525742	0.149786	3.50995	0.000448198	0.00389794
MDGA1	500.125	0.525274	0.157681	3.33125	0.000864572	0.00666685
CHMP1B	524.881	0.523499	0.136381	3.83851	0.000123784	0.0013172
EHD3	173.747	0.522422	0.171002	3.05506	0.00225018	0.014439
ATP7B	165.145	0.522395	0.178898	2.92008	0.00349942	0.0206634
RAB6B	79.6714	0.522316	0.204983	2.5481	0.0108312	0.0493994
PCDH10	369.878	0.521462	0.141364	3.6888	0.000225314	0.00219994
PHLDB1	554.118	0.521048	0.140166	3.71735	0.00020132	0.0019918
PPFIBP1	551.976	0.519908	0.158251	3.28533	0.00101861	0.00760894
HEXDC	187.841	0.519678	0.175674	2.9582	0.00309444	0.0185843
RNF112	105.608	0.519504	0.191298	2.71567	0.00661414	0.0339397
MRAP2	292.069	0.51944	0.151222	3.43495	0.000592671	0.00486044
DST	2941.79	0.519129	0.122037	4.25386	2.10114e-05	0.000291878
RNF19A	798.114	0.51851	0.13699	3.78503	0.000153689	0.00158758
SLC31A1	3444.15	0.518443	0.101992	5.08315	3.71227e-07	8.32892e-06
FOXC1	363.803	0.518394	0.168444	3.07754	0.00208717	0.0136069
CTSH	140.18	0.518111	0.18309	2.82982	0.00465741	0.0259854
UACA	91.9662	0.517916	0.2013	2.57285	0.0100865	0.0468403
SIPA1L1	452.894	0.517505	0.14987	3.45303	0.000554324	0.00459359
IL11RA	649.312	0.51739	0.126333	4.09544	4.21374e-05	0.000523778
SERAC1	151.651	0.516946	0.181167	2.85343	0.00432501	0.0245812
EIF4A2	6201.99	0.516503	0.133401	3.87181	0.000108029	0.00117239
GPR146	89.057	0.516145	0.200739	2.57122	0.010134	0.0469899
FMNL2	281.324	0.514518	0.156369	3.29041	0.00100043	0.00749969
TPRG1L	125.369	0.514318	0.193331	2.66029	0.00780725	0.0385008
NDRG2	186.16	0.514126	0.168455	3.05201	0.00227313	0.0145494
SETDB2	183.652	0.513794	0.167596	3.06566	0.00217189	0.0140507
C7orf60	188.79	0.513526	0.18577	2.76431	0.00570435	0.0301894
LTA4H	1274.99	0.513216	0.11521	4.45462	8.40435e-06	0.000130649
STK32C	97.4524	0.512902	0.196466	2.61063	0.00903743	0.0430632
PSAP	8331.16	0.512641	0.10918	4.69537	2.6612e-06	4.72961e-05
CTSL2	447.821	0.512198	0.149454	3.42713	0.000610004	0.00498643
ADAMTS7	307.58	0.511105	0.17672	2.89217	0.00382592	0.0222079
HPCAL4	98.1743	0.51104	0.19441	2.62868	0.00857179	0.0414075
ZSCAN12P1	131.877	0.510762	0.192067	2.6593	0.0078304	0.0385698
B3GALTL	97.8592	0.510126	0.196339	2.59819	0.0093716	0.0443155
ABCD4	316.354	0.509849	0.156914	3.24924	0.00115715	0.00843469
NUDT19	263.26	0.509215	0.168284	3.02593	0.00247874	0.0156306
PLXNB1	208.137	0.509053	0.180036	2.8275	0.00469133	0.0261171
FSD1L	236.979	0.507345	0.162451	3.12307	0.00178975	0.0119765
WDR19	604.172	0.506748	0.127123	3.98627	6.71201e-05	0.000782079
NBR1	1804.71	0.506717	0.106774	4.74567	2.07813e-06	3.78368e-05
C11orf95	653.234	0.506645	0.137099	3.69548	0.000219474	0.00214789
PPP1R3C	158.149	0.505729	0.182323	2.77381	0.00554033	0.0295264
RELL2	96.4829	0.505422	0.196107	2.57728	0.0099581	0.0464125
RND2	149.86	0.505207	0.181787	2.77912	0.00545061	0.0292875
ARMC9	296.342	0.505004	0.149164	3.38556	0.000710339	0.00569261
ZKSCAN1	1089.28	0.504179	0.117976	4.27357	1.92367e-05	0.000269868
KAT6B	254.771	0.503939	0.15985	3.15258	0.00161833	0.0110336
EMILIN2	109.666	0.50359	0.192877	2.61094	0.00902933	0.0430632
MFSD6	443.216	0.503438	0.149833	3.36	0.000779437	0.00614134
ITGA1	810.154	0.503044	0.130056	3.8679	0.000109778	0.00118831
AGL	747.516	0.502934	0.134917	3.72772	0.00019322	0.00192824
PRKAB2	472.434	0.50182	0.140221	3.57879	0.00034519	0.00315778
NRP2	294.834	0.501085	0.148747	3.3687	0.000755249	0.00600309
C12orf76	150.999	0.500523	0.175802	2.84709	0.00441212	0.0249357
FRY	814.287	0.5005	0.132673	3.77244	0.000161657	0.00165411
NEAT1	344.862	0.500359	0.153059	3.26905	0.00107909	0.0079713
ALDH6A1	115.703	0.499469	0.188911	2.64394	0.00819477	0.039991
WDR5B	298.958	0.498935	0.153702	3.24612	0.00116989	0.00848305
KLHL5	575.495	0.498927	0.131391	3.79728	0.000146291	0.0015161
SCAND3	158.343	0.498834	0.186537	2.67418	0.00749126	0.0373353
ARSG	177.561	0.498788	0.172759	2.88719	0.00388697	0.0224473
GULP1	449.04	0.498767	0.141278	3.53039	0.000414944	0.00365902
TMEM67	179.412	0.49795	0.16936	2.94018	0.00328022	0.01957
COPG2	140.075	0.497205	0.179638	2.76782	0.00564329	0.0299288
PGM2L1	262.495	0.495439	0.161838	3.06132	0.00220361	0.0142051
RCN1	546.688	0.494869	0.147416	3.35696	0.000788045	0.00620145
ACCN2	337.917	0.494524	0.177316	2.78894	0.00528813	0.028621
SPRY4	635.037	0.494192	0.154257	3.2037	0.00135673	0.00953253
SFXN3	165.861	0.494105	0.181567	2.72134	0.00650185	0.0334721
SLC43A2	310.583	0.493677	0.159477	3.09561	0.00196411	0.0129245
ZDHHC21	360.776	0.493613	0.15833	3.11761	0.00182321	0.0121426
ZNF862	182.709	0.493402	0.174484	2.82778	0.00468716	0.0261107
BBS9	114.922	0.493312	0.189199	2.60738	0.00912382	0.0433707
EPB41L4A-AS1	883.442	0.493143	0.124998	3.94521	7.97286e-05	0.000900791
GDF11	466.076	0.492961	0.140548	3.50741	0.000452491	0.00392987
TMEM38A	132.528	0.492902	0.187399	2.63023	0.00853271	0.0412583
RFX5	1660.6	0.491404	0.11957	4.10977	3.96059e-05	0.000496703
MAGI2-AS3	678.149	0.490817	0.140275	3.49897	0.000467067	0.00402059
MAPRE3	183.23	0.490016	0.17875	2.74135	0.0061188	0.0319551
ANKZF1	574.054	0.489741	0.130268	3.75949	0.000170262	0.00173191
SLC25A16	183.565	0.489558	0.175637	2.78732	0.00531453	0.0287271
VAT1	1740.68	0.488199	0.125532	3.88904	0.00010064	0.00109879
KIAA0513	145.531	0.487892	0.189282	2.57759	0.00994906	0.0463874
ZNF808	178.457	0.486388	0.173689	2.80034	0.00510491	0.0278557
DYNC2H1	1130.65	0.485627	0.140271	3.46207	0.000536036	0.00449206
MYO18A	206.744	0.483472	0.17667	2.73658	0.00620816	0.0322512
GDPD1	326.714	0.483464	0.145672	3.31886	0.000903872	0.00692263
TSPYL4	895.518	0.483345	0.119866	4.03237	5.52169e-05	0.000659165
CCNDBP1	679.752	0.482629	0.132497	3.64257	0.000269925	0.00256236
LOC730101	661.494	0.48222	0.128814	3.74355	0.00018144	0.00182479
C22orf46	122.707	0.48213	0.187664	2.56911	0.0101961	0.0472056
ZSCAN30	166.695	0.480692	0.17192	2.79602	0.00517359	0.0281093
SERINC1	2723.06	0.4803	0.122882	3.90863	9.28211e-05	0.00102492
PNPLA8	613.268	0.479925	0.134156	3.57738	0.000347061	0.00316862
SKIL	1067.85	0.479301	0.136771	3.50442	0.000457606	0.0039607
RBP1	821.715	0.477411	0.139625	3.41922	0.000627998	0.0051181
TJP1	521.373	0.477236	0.136332	3.50055	0.0004643	0.00400222
DNAJB2	236	0.476856	0.170051	2.8042	0.00504422	0.027596
FAM175A	345.19	0.476717	0.15027	3.1724	0.00151183	0.0104325
C7	352.268	0.47548	0.144283	3.29546	0.000982598	0.00737911
ZNF277	393.538	0.474763	0.142128	3.34039	0.000836615	0.00649082
FAM63A	168.091	0.474506	0.183582	2.58471	0.00974599	0.0456762
THSD1P1	172.37	0.474478	0.17215	2.75618	0.00584803	0.0307953
BTG1	804.307	0.474361	0.131793	3.59929	0.000319093	0.00294945
RAB11FIP4	354.607	0.474022	0.155098	3.05628	0.00224105	0.014395
CEP70	168.027	0.473518	0.177264	2.67126	0.00755667	0.0375578
INTU	238.94	0.473321	0.16149	2.93097	0.00337909	0.0200558
HECTD2	349.459	0.473226	0.145136	3.26056	0.00111192	0.00817085
PLCB4	1453.61	0.47274	0.112693	4.19492	2.72966e-05	0.000364919
ASAH1	1303.14	0.472733	0.117267	4.03125	5.54819e-05	0.000661704
PICK1	282.856	0.472537	0.163103	2.89717	0.00376546	0.0219273
LANCL1	1811.73	0.471728	0.116698	4.04231	5.29271e-05	0.000636719
GPR22	487.042	0.471678	0.156629	3.01144	0.00260011	0.0162237
ZNF512	880.789	0.471433	0.131177	3.59386	0.000325811	0.00300715
TMEM119	128.347	0.471281	0.184638	2.55245	0.0106967	0.0489887
S1PR2	208.623	0.471267	0.166727	2.82657	0.00470489	0.0261695
PAM	1189.44	0.470576	0.119676	3.93209	8.42094e-05	0.00094803
LOC728392	187.93	0.470559	0.166116	2.83271	0.00461546	0.0257968
PCGF5	217.1	0.470444	0.164328	2.86284	0.00419859	0.0239751
ZNF226	421.993	0.46995	0.143346	3.27842	0.0010439	0.00777584
ZNF135	161.92	0.469805	0.181032	2.59515	0.00945506	0.0445603
ARNT2	303.743	0.469575	0.173014	2.71409	0.00664573	0.034019
CYTH2	800.377	0.469141	0.128016	3.6647	0.00024763	0.0023829
BAIAP2	308.184	0.468038	0.168473	2.77812	0.00546744	0.0293315
EXOC1	795.864	0.467916	0.129512	3.61291	0.000302784	0.00283389
BBS2	490.5	0.46763	0.139819	3.34453	0.000824211	0.0064182
SPSB3	394.833	0.46762	0.13983	3.34421	0.00082517	0.00642171
APPL2	232.146	0.46739	0.160921	2.90447	0.0036788	0.0215217
TRIM4	330.973	0.466605	0.161034	2.89755	0.00376092	0.021911
NREP	2050.38	0.466439	0.10607	4.39747	1.0952e-05	0.00016518
ZC2HC1A	369.937	0.466408	0.155019	3.00871	0.00262356	0.0163483
GAB2	1085.22	0.466234	0.118124	3.94697	7.9146e-05	0.000896014
ZNF229	357.518	0.465343	0.149131	3.12036	0.00180628	0.0120489
MZF1	137.545	0.465336	0.182334	2.55211	0.0107074	0.0490199
IGF2R	1275.89	0.46441	0.133646	3.47493	0.000510994	0.00432468
PCDHA11	201.49	0.464168	0.169488	2.73865	0.00616915	0.0321346
PCMTD2	1189.7	0.463618	0.128729	3.6015	0.000316385	0.00293299
FKBP10	5236.52	0.463364	0.103217	4.48921	7.14877e-06	0.000114652
PAPSS1	1423.92	0.462613	0.117074	3.95147	7.7674e-05	0.000883096
TDRKH	543.848	0.462485	0.141136	3.27688	0.00104962	0.00780368
LOC100499467	180.085	0.461598	0.172586	2.6746	0.0074819	0.0373034
CTSL1	770.275	0.461353	0.137361	3.35868	0.000783154	0.00616679
B3GAT1	235.712	0.459591	0.16947	2.71194	0.00668914	0.0341584
AGXT2L2	258.224	0.458811	0.15447	2.97023	0.00297578	0.0180429
TRAK1	303.337	0.458805	0.170832	2.68571	0.00723753	0.036386
EFR3B	313.717	0.458245	0.164616	2.78371	0.00537407	0.028987
KIAA1671	226.772	0.45801	0.174483	2.62495	0.00866608	0.0416643
LOC100506710	1003.58	0.457855	0.116996	3.91344	9.09922e-05	0.00101001
STMN2	14121.6	0.457271	0.105768	4.32335	1.5368e-05	0.000221741
TRIM44	384.527	0.4571	0.145668	3.13795	0.00170135	0.0115066
BTBD3	790.579	0.456715	0.117925	3.87293	0.000107533	0.001168
GSTK1	572.382	0.456609	0.132023	3.45855	0.000543086	0.00453312
NAALAD2	256.366	0.45612	0.156693	2.91092	0.00360368	0.0211901
PLEKHM3	281.855	0.456108	0.162186	2.81225	0.00491959	0.0270898
DCAF8	1142.63	0.455956	0.119887	3.80321	0.000142834	0.00148393
RIN2	229.089	0.45595	0.163122	2.79515	0.00518762	0.0281613
MIR5047	317.645	0.45581	0.147559	3.08901	0.00200825	0.0131739
LYRM1	325.82	0.455712	0.146083	3.11954	0.00181131	0.0120761
CPVL	428.845	0.455318	0.142229	3.2013	0.00136809	0.00960701
GAA	397.783	0.455172	0.153547	2.96438	0.00303296	0.0183106
PCNXL2	368.871	0.454838	0.149627	3.03981	0.0023673	0.0150456
LMBRD1	298.965	0.454789	0.14768	3.07956	0.00207306	0.0135289
SCG2	8494.63	0.45475	0.121405	3.74572	0.000179874	0.00181342
GNPTAB	363.015	0.454551	0.150253	3.02523	0.00248442	0.0156448
C12orf23	485.511	0.45336	0.137391	3.29978	0.000967614	0.00729255
NDRG4	990.634	0.452992	0.120415	3.76191	0.000168624	0.001718
CLK1	1330.06	0.452926	0.123291	3.67363	0.000239126	0.00231515
IFI27L2	152.124	0.451563	0.175669	2.57053	0.0101542	0.0470664
NUMA1	4396.69	0.451251	0.117088	3.85396	0.00011622	0.00125056
STAT3	1099.12	0.450949	0.132569	3.40161	0.00066991	0.00539939
TH	752.8	0.449639	0.140619	3.19758	0.00138586	0.00970484
ACAD10	264.672	0.447796	0.16849	2.65771	0.00786736	0.0387163
SNX30	451.692	0.447746	0.134476	3.32957	0.000869812	0.00670317
ACADVL	876.042	0.446301	0.122743	3.63606	0.000276844	0.00262018
MADD	651.192	0.446224	0.134853	3.30897	0.000936405	0.00711668
IDS	1751.62	0.445772	0.130375	3.41917	0.000628134	0.0051181
AK3	832.814	0.445217	0.128916	3.45354	0.000553286	0.00458799
TNIK	398.192	0.44333	0.141829	3.1258	0.00177322	0.0118847
DLG1	2089.45	0.443219	0.123005	3.60325	0.000314262	0.00292188
TTC14	854.96	0.443041	0.122929	3.60404	0.000313313	0.00291733
WSB1	447.4	0.44299	0.141896	3.12193	0.00179667	0.0120164
EPOR	166.974	0.442464	0.171352	2.58219	0.00981745	0.0459261
POLM	165.528	0.4418	0.173452	2.54711	0.010862	0.0494594
TAX1BP1	928.863	0.441556	0.125751	3.51135	0.000445844	0.0038828
ANXA6	2339.06	0.440996	0.108824	4.05239	5.06981e-05	0.000613908
GDAP1L1	1022.3	0.440943	0.131756	3.34666	0.000817915	0.00638763
TSPAN13	421.613	0.440312	0.139705	3.15173	0.00162308	0.01106
PDP1	495.929	0.439727	0.146634	2.9988	0.00271045	0.0167963
PDE4DIP	961.316	0.439323	0.11797	3.72401	0.000196085	0.00195221
LAMA4	844.547	0.438298	0.123326	3.55397	0.00037946	0.00339822
SPIN3	535.027	0.438116	0.130721	3.35153	0.000803653	0.00630076
C14orf133	423.302	0.438011	0.13783	3.17791	0.00148341	0.0102799
BBS1	273.239	0.437302	0.15639	2.79623	0.00517031	0.0281036
ANKS1A	218.438	0.437162	0.166522	2.62525	0.0086585	0.0416437
AP3B2	261.275	0.436972	0.165387	2.64212	0.00823887	0.0401887
IP6K2	872.886	0.436885	0.12122	3.60407	0.00031327	0.00291733
JPH4	479.745	0.436603	0.137996	3.16387	0.00155687	0.0106953
EEF1A2	8826.53	0.436593	0.146783	2.97442	0.00293547	0.0178951
RHOBTB3	3497.3	0.435493	0.103347	4.21391	2.50987e-05	0.000341505
DBT	423.466	0.434616	0.14364	3.02573	0.00248034	0.0156306
TTN	686.11	0.434282	0.150423	2.88707	0.00388846	0.0224473
GAS5	4321.7	0.433613	0.12115	3.57915	0.000344711	0.00315628
SCARNA21	424.014	0.433319	0.145365	2.9809	0.00287399	0.017637
LOC339290	346.351	0.43331	0.144254	3.00381	0.00266624	0.016571
ALS2CR8	181.949	0.432868	0.170114	2.54457	0.0109412	0.0497486
KCNT1	1461.4	0.432623	0.125007	3.46078	0.000538612	0.00450469
TBKBP1	507.913	0.432245	0.138939	3.11105	0.00186424	0.0123638
MALAT1	17717.9	0.431654	0.133475	3.23396	0.00122084	0.0088026
GRAMD1A	628.174	0.431175	0.161531	2.66931	0.00760069	0.0377617
CDK19	354.506	0.43075	0.155118	2.77692	0.00548768	0.0293772
KIAA0430	486.736	0.430095	0.142242	3.0237	0.00249707	0.0157047
ZNF654	213.552	0.429726	0.16881	2.54562	0.0109084	0.0496352
TMEM132E	256.632	0.429304	0.161299	2.66154	0.00777836	0.0384032
KIAA1467	268.772	0.428914	0.162585	2.63809	0.00833737	0.0405773
NPDC1	593.241	0.428267	0.148622	2.88159	0.00395677	0.0227897
CDH18	248.695	0.428162	0.157689	2.71523	0.0066229	0.0339709
EFHA2	424.201	0.428076	0.161328	2.65345	0.00796744	0.039056
MAPK8	316.618	0.427953	0.148458	2.88265	0.00394344	0.0227336
ANKRD12	315.08	0.427804	0.154137	2.77547	0.00551219	0.0294711
DENND3	318.915	0.427495	0.159511	2.68003	0.00736155	0.0368871
KIAA1109	901.202	0.426595	0.128555	3.31837	0.000905441	0.00692293
ARMCX1	577.194	0.426193	0.134407	3.17091	0.0015196	0.010479
CAPRIN2	242.824	0.425422	0.160084	2.65749	0.00787239	0.0387163
EMP2	220.057	0.425025	0.163928	2.59275	0.00952119	0.0447885
LETMD1	765.53	0.42469	0.122456	3.4681	0.000524159	0.00440419
ROBO2	345.233	0.424453	0.154746	2.74291	0.00608973	0.0318428
MAPKAPK2	377.993	0.424124	0.160832	2.63707	0.00836257	0.0406566
ZBTB38	546.84	0.423567	0.132675	3.19252	0.00141037	0.00983838
USP11	1010.59	0.42221	0.129308	3.26516	0.00109404	0.00805819
FAM174A	250.938	0.421986	0.159038	2.65337	0.00796923	0.039056
KCNT2	511.684	0.421742	0.147119	2.86667	0.00414818	0.0237302
CHRNA7	355.88	0.421635	0.147984	2.84919	0.00438302	0.0248128
BEX4	704.829	0.420669	0.135473	3.10518	0.00190161	0.0125655
ZNF518A	696.315	0.4201	0.149355	2.81277	0.00491169	0.0270699
ELMO2	378.275	0.420014	0.147375	2.84997	0.00437231	0.0247771
ZNF532	918.603	0.419649	0.127311	3.29626	0.000979799	0.00736246
CD276	889.455	0.4196	0.149048	2.81521	0.00487459	0.0269123
PTPN12	270.583	0.419219	0.150936	2.77747	0.00547844	0.0293747
ENGASE	245.223	0.418817	0.157661	2.65643	0.00789723	0.0388084
PTPRR	1682.86	0.418553	0.114469	3.65646	0.000255724	0.00244961
TSHZ2	635.461	0.418475	0.136713	3.06098	0.00220612	0.0142139
LOC400027	351.102	0.418154	0.142957	2.92504	0.00344415	0.0203751
RASL11B	317.451	0.418051	0.15151	2.75923	0.00579379	0.0305477
THBS3	955.559	0.417692	0.120784	3.45817	0.000543862	0.0045366
BEX2	512.731	0.417153	0.159823	2.6101	0.00905164	0.0431054
ZNF560	296.758	0.416887	0.153839	2.70989	0.00673048	0.0343003
GALT	443.227	0.416856	0.133231	3.12881	0.00175514	0.011776
RPPH1	245626	0.415441	0.126689	3.27922	0.00104093	0.00776188
PJA2	1854.26	0.413472	0.118978	3.47519	0.000510498	0.00432468
FLNA	8269.44	0.413199	0.11892	3.4746	0.00051162	0.00432468
SLC25A36	1020.1	0.412231	0.128988	3.19588	0.00139405	0.00975142
ZFP90	433.539	0.411706	0.136285	3.02092	0.00252006	0.0157943
KLHL28	465.422	0.411681	0.144779	2.84351	0.00446195	0.0251163
NF1	223.408	0.411163	0.161083	2.55249	0.0106957	0.0489887
ITGB5	878.101	0.411085	0.123019	3.34164	0.00083286	0.00646565
LOC100505576	235.648	0.410853	0.160321	2.56269	0.0103864	0.0479671
TBCK	343.303	0.410514	0.152037	2.70009	0.00693199	0.0351291
FGF14	525.529	0.40947	0.14172	2.88929	0.0038611	0.0223872
SYT11	2769.22	0.409116	0.103385	3.95723	7.58248e-05	0.000865963
ZNF300	1421.59	0.408564	0.142884	2.8594	0.00424446	0.0242152
UBE2Q2	544.078	0.408045	0.129139	3.15973	0.00157917	0.0108085
KLHDC8B	547.229	0.407637	0.140743	2.89631	0.00377575	0.0219772
NPTX2	358.456	0.405865	0.142586	2.84646	0.00442087	0.0249628
VPS13C	2638.03	0.404774	0.12774	3.16872	0.00153111	0.0105412
USP19	616.662	0.404297	0.130101	3.10756	0.00188642	0.0124977
TBC1D9	462.358	0.404206	0.149097	2.71103	0.00670755	0.0342247
HEATR5B	947.966	0.403707	0.133609	3.02155	0.00251485	0.0157773
FNBP1L	501.339	0.40331	0.142431	2.83161	0.00463141	0.0258746
ZNF594	325.069	0.402422	0.149324	2.69497	0.00703959	0.0355463
PMEPA1	512.39	0.402417	0.13628	2.95287	0.00314831	0.018872
WDR26	558.535	0.402332	0.131396	3.06199	0.00219872	0.0141807
ARHGEF25	248.054	0.401673	0.157107	2.55668	0.0105675	0.04852
ALG13	494.215	0.401568	0.131502	3.05371	0.00226032	0.0144821
LAMC1	2585.27	0.400577	0.112388	3.56425	0.000364902	0.0032857
SPTBN4	293.65	0.400189	0.153183	2.6125	0.00898827	0.0429522
UNC79	1103.43	0.400045	0.125904	3.17738	0.0014861	0.0102929
CC2D2A	794.877	0.399804	0.12095	3.30554	0.000947946	0.00719143
FGFR1	625.956	0.399504	0.141827	2.81684	0.00484986	0.0268186
C1orf21	1055.2	0.399091	0.12557	3.17823	0.00148179	0.0102743
ARMCX3	828.676	0.398857	0.124847	3.19477	0.00139944	0.00977832
ZNF322	285.561	0.398737	0.153438	2.59868	0.00935825	0.0442855
TMEM170B	348.959	0.398393	0.152527	2.61195	0.00900265	0.0430047
CFLAR	357.812	0.397963	0.146697	2.71283	0.00667119	0.0340942
C1orf63	360.719	0.397828	0.147865	2.69048	0.00713493	0.0359273
STX1A	385.313	0.397428	0.144154	2.75697	0.00583395	0.0307339
DPP6	562.149	0.397057	0.139193	2.85257	0.00433679	0.0246089
DUSP10	346.63	0.397019	0.143318	2.77019	0.00560243	0.0297745
SERPINH1	802.031	0.396907	0.150645	2.63472	0.00842057	0.0408889
MED13L	1014.29	0.396219	0.139276	2.84485	0.0044433	0.0250448
ATRX	2441.73	0.393414	0.120116	3.27527	0.00105559	0.0078297
MFSD10	524.362	0.392234	0.132253	2.96579	0.00301905	0.0182354
RYBP	1198.37	0.391742	0.114167	3.43132	0.000600662	0.00491642
RGS2	375.548	0.39028	0.139837	2.79096	0.00525515	0.0284547
TMEM106B	1532.65	0.389869	0.138632	2.81226	0.00491948	0.0270898
KIF3C	471.712	0.389424	0.139695	2.78768	0.00530871	0.0287079
CLK4	326.901	0.389401	0.152798	2.54848	0.0108195	0.0493764
CYP2U1	559.246	0.389262	0.130459	2.9838	0.00284693	0.0175134
SECISBP2L	497.958	0.388124	0.138041	2.81166	0.00492867	0.0271239
ZNF780B	605.588	0.388058	0.142776	2.71795	0.00656882	0.0337756
ATP8A1	1574.26	0.388048	0.144947	2.67717	0.00742459	0.0371347
BBX	1416.14	0.387911	0.119364	3.24981	0.00115482	0.00842251
POGZ	446.373	0.3878	0.151487	2.55995	0.0104687	0.0482416
TMOD1	766.277	0.38697	0.148492	2.60599	0.00916081	0.0435139
DNMT3A	1270.19	0.385919	0.110773	3.48386	0.000494242	0.00421579
PNMA1	647.974	0.385714	0.139715	2.76072	0.00576741	0.0304594
HGF	861.478	0.384072	0.136177	2.82039	0.00479655	0.0265626
ZNF227	528.268	0.383681	0.138298	2.77432	0.00553176	0.0294997
SPATA20	511.515	0.382903	0.135946	2.81659	0.00485368	0.0268203
TTLL7	331.163	0.382493	0.145046	2.63704	0.0083633	0.0406566
DUSP26	797.074	0.382332	0.128542	2.97438	0.00293585	0.0178951
IMPACT	516.871	0.382085	0.134187	2.8474	0.00440775	0.0249332
CHST2	571.519	0.381421	0.132029	2.88892	0.00386573	0.0223876
SCARNA7	1936.84	0.381192	0.139228	2.73789	0.00618343	0.03216
CDK5RAP3	1445.87	0.380764	0.11168	3.40941	0.000651028	0.00528084
HDAC5	1270.24	0.380656	0.11528	3.30201	0.000959951	0.00724342
CHD3	1709.88	0.380062	0.120167	3.16278	0.00156272	0.0107238
PAQR8	1643.87	0.379109	0.117758	3.21938	0.00128468	0.00912482
LOC646719	1001.85	0.378153	0.122386	3.08983	0.00200274	0.0131446
MORC3	475.798	0.377965	0.136233	2.7744	0.00553044	0.0294997
BIN1	427.839	0.377278	0.139444	2.70559	0.00681827	0.0346639
TAP2	304.099	0.377192	0.146508	2.57455	0.0100369	0.0466938
FHL1	1512.22	0.37695	0.108106	3.48686	0.000488733	0.00417584
SPEG	910.65	0.376226	0.135387	2.7789	0.00545437	0.0292952
TCEAL8	591.91	0.375952	0.134284	2.79969	0.00511524	0.0279001
ZNF740	528.365	0.375612	0.139405	2.69438	0.00705188	0.0355942
PILRB	596.263	0.375333	0.134827	2.78381	0.00537241	0.028987
MOAP1	1113.87	0.374984	0.114229	3.28273	0.00102807	0.0076705
ADCYAP1	634.127	0.374831	0.126337	2.96692	0.00300802	0.0182122
LRP12	445.576	0.374195	0.146285	2.55799	0.0105279	0.048426
TMEM164	429.318	0.37387	0.140208	2.66653	0.00766385	0.0380009
KLHL7	443.079	0.372995	0.138265	2.69767	0.00698256	0.0353147
CYLD	634.408	0.370671	0.137736	2.69118	0.00712005	0.0359096
CYTH3	457.268	0.369186	0.133976	2.75561	0.00585823	0.0308361
TLN2	854.239	0.368383	0.144192	2.5548	0.0106248	0.0487478
RPS6KC1	809.018	0.368316	0.129008	2.855	0.00430373	0.0244872
CUL4B	742.191	0.368085	0.125026	2.94408	0.00323921	0.0193435
ZNF529	457.004	0.367685	0.135774	2.70807	0.00676757	0.0344615
UNC13B	1776.81	0.367531	0.106706	3.44432	0.000572491	0.00471942
DYNC1I2	818.626	0.367046	0.126185	2.90879	0.00362833	0.0213053
NRP1	2668.85	0.36698	0.111289	3.29754	0.000975344	0.00733769
DYNC1I1	356.039	0.366377	0.142398	2.5729	0.010085	0.0468403
TADA2B	408.676	0.366074	0.138003	2.65265	0.00798629	0.0391245
LGALS3BP	3203.6	0.363972	0.120437	3.0221	0.00251026	0.0157659
KIAA1797	927.06	0.36349	0.132977	2.73348	0.00626699	0.0324744
KLF10	583.121	0.363258	0.130889	2.77532	0.00551476	0.0294711
TP53I3	736.614	0.362913	0.123458	2.93958	0.00328662	0.0195989
GCH1	711.836	0.362236	0.124361	2.91278	0.00358227	0.0210837
ZNF84	816.877	0.362117	0.132982	2.72305	0.00646814	0.0333528
GUCY1A3	1579.32	0.36158	0.134479	2.68874	0.00717229	0.0361011
GRIPAP1	527.986	0.359381	0.13511	2.65992	0.00781599	0.0385288
ZNF302	760.181	0.359149	0.13422	2.67582	0.00745466	0.0372263
RHOQ	944.682	0.358163	0.125388	2.85643	0.00428428	0.0243984
PDGFRB	550.241	0.356312	0.134072	2.65763	0.00786932	0.0387163
IGBP1	654.463	0.356063	0.140042	2.54255	0.0110048	0.0499835
CBR4	846.101	0.35426	0.127344	2.78191	0.005404	0.0291236
PNPO	452.095	0.354111	0.137369	2.5778	0.00994301	0.0463819
PNISR	1483.19	0.353632	0.112908	3.13203	0.00173603	0.0116725
GDAP1	1339.45	0.352776	0.111493	3.16411	0.00155556	0.010692
SPTBN2	2066.06	0.351921	0.118786	2.96264	0.00305017	0.0183882
DCAF5	447.867	0.35155	0.134774	2.60845	0.00909543	0.043252
PARP6	560.507	0.351507	0.137984	2.54745	0.0108515	0.0494293
KIDINS220	3765.12	0.351309	0.112872	3.11245	0.00185544	0.0123183
XPR1	3095.87	0.350473	0.10797	3.24602	0.0011703	0.00848305
SKIV2L	713.762	0.350443	0.131451	2.66596	0.00767682	0.0380503
LAMB1	3724.74	0.350383	0.107789	3.25064	0.00115146	0.00841258
ZNF711	1129.6	0.349569	0.13523	2.58499	0.00973805	0.0456728
TXNIP	2813.93	0.349402	0.117042	2.98526	0.00283339	0.0174471
DLL3	869.178	0.349041	0.1337	2.61063	0.00903745	0.0430632
NDFIP2	1005.17	0.348103	0.136907	2.54262	0.0110025	0.0499835
CAMK2G	412.396	0.347274	0.136269	2.54845	0.0108204	0.0493764
CYBA	870.391	0.34494	0.130986	2.63341	0.00845313	0.0410145
ZNF266	463.993	0.344869	0.13459	2.56237	0.0103962	0.0479771
KIAA0141	1045.66	0.343512	0.115452	2.97536	0.00292649	0.0178725
SMARCC2	932.959	0.343359	0.124176	2.7651	0.00569061	0.0301479
NCAM1	3704.29	0.343293	0.121652	2.82193	0.00477354	0.0264699
YIPF3	830.241	0.342756	0.131916	2.59829	0.00936889	0.0443155
PRNP	1026.59	0.342342	0.11756	2.91207	0.00359045	0.0211221
EEF2	71248.4	0.342203	0.101798	3.36159	0.000774949	0.00611741
QARS	1958.89	0.341947	0.113116	3.02297	0.00250307	0.0157347
GOLGA2	585.129	0.341517	0.128698	2.65363	0.00796314	0.039056
PNMA2	766.98	0.339749	0.119542	2.8421	0.00448178	0.0251943
BOD1L	1327.92	0.339564	0.118529	2.86481	0.00417261	0.0238591
KLF13	2413.81	0.339306	0.115953	2.92623	0.00343096	0.0203065
PRCP	1104.15	0.339041	0.113324	2.99178	0.00277355	0.0171286
RASA1	730.651	0.33636	0.127713	2.63371	0.0084458	0.0409947
NCOA2	766.012	0.335561	0.131953	2.54303	0.0109895	0.0499502
PIK3R3	859.924	0.335552	0.127654	2.62861	0.00857339	0.0414075
RMND5A	1848.31	0.335468	0.117175	2.86297	0.00419687	0.0239751
CIRBP	4266.26	0.33542	0.109094	3.0746	0.00210786	0.0137168
MTMR3	739.15	0.334898	0.124093	2.69877	0.00695971	0.0352273
FBXO30	814.838	0.333844	0.128598	2.59602	0.00943099	0.0445131
NOMO1	1954.49	0.333441	0.116079	2.87252	0.00407209	0.0233688
THSD7A	2029.7	0.333328	0.1227	2.7166	0.00659554	0.0338955
C19orf63	2381.87	0.333064	0.107589	3.09572	0.00196335	0.0129245
TTC17	883.497	0.333041	0.117105	2.84396	0.00445569	0.0250923
GNG2	1458.29	0.329747	0.113771	2.89834	0.00375144	0.021886
GNS	1401.21	0.328329	0.114392	2.87021	0.00410196	0.0235082
CSNK1G3	1197.95	0.327379	0.121779	2.6883	0.00718168	0.036134
EIF4B	19898.2	0.32678	0.108178	3.02076	0.00252139	0.0157949
RIMS4	1026.11	0.325775	0.119293	2.73089	0.00631634	0.0326507
RB1CC1	3829.21	0.321161	0.125306	2.56301	0.0103769	0.0479407
MKRN1	1054.54	0.321018	0.117156	2.74009	0.00614232	0.0320383
SRSF8	1161.74	0.320672	0.110669	2.89758	0.00376059	0.021911
SON	3119.91	0.320097	0.115585	2.76936	0.00561672	0.0298229
RAP2A	1518.84	0.318495	0.124293	2.56245	0.0103936	0.0479771
TTC3	5007.83	0.317033	0.115672	2.7408	0.00612899	0.031982
SOX4	4576.46	0.31701	0.103422	3.06521	0.00217516	0.0140646
CLASP2	1531.19	0.315817	0.118387	2.66767	0.00763802	0.0379323
SPG11	1405.7	0.31518	0.122261	2.57792	0.00993973	0.0463819
TMEM66	3260.27	0.313612	0.107343	2.92158	0.0034826	0.0205833
RPL3	26035.4	0.312354	0.117177	2.66566	0.00768363	0.0380692
SLC6A2	7453.72	0.310313	0.111142	2.79205	0.00523759	0.0283718
C17orf76-AS1	9962.8	0.307622	0.103234	2.97985	0.00288387	0.0176848
LUC7L3	3757.51	0.307575	0.119087	2.58277	0.00980114	0.0458785
CPNE8	985.667	0.303562	0.116157	2.61338	0.00896527	0.0428585
TUG1	2007.72	0.30218	0.11509	2.62559	0.00864991	0.0416182
MIA3	1207.24	0.30201	0.115651	2.6114	0.00901728	0.0430421
C3orf17	1296.44	0.293318	0.115373	2.54233	0.0110115	0.0499961
SCARB2	3887.38	0.293255	0.107368	2.7313	0.00630857	0.0326498
ICA1	2687.92	0.284905	0.103536	2.75175	0.00592781	0.0310989
HIF1A	3390.91	0.273792	0.106523	2.57025	0.0101625	0.0470876
YWHAH	2508.78	0.266171	0.10421	2.55419	0.0106435	0.0488157

## Sheet: Overlap_Be(2)C_IMR5-75_EPZ+DAC
gene symbol
A2LD1
ABAT
ABCA5
ABCC6
ABCD1
ABCD4
ABHD4
ACAD10
ACADVL
ACCN2
ACP6
ACRC
ACSF2
ACSL6
ADAMTS7
ADAMTSL2
ADCY5
ADCY6
ADCYAP1
AGL
AGRN
AGXT2L2
AHCYL2
AHNAK
AHNAK2
AKD1
ALDH1A3
AMOT
ANK3
ANKRA2
ANKRD6
ANKS1A
ANKZF1
AP1G2
AP3B2
AP5B1
APBB3
APH1B
ARHGAP18
ARHGAP26
ARHGAP27
ARHGEF10L
ARHGEF25
ARHGEF3
ARSA
ARSG
ASAH1
ATP2B4
ATP7B
ATP9A
ATRNL1
B4GALNT3
BBC3
BBS1
BBS2
BBS9
BIN1
BMF
BTG1
BTG2
C11orf95
C12orf68
C14orf101
C1orf114
C1orf63
C20orf112
C20orf194
C4orf34
C5orf4
C5orf41
C6orf192
C7orf41
C8orf44
CA5B
CACNA2D2
CADM4
CADPS
CALCOCO1
CAPRIN2
CBFA2T2
CCDC80
CCNDBP1
CCNG2
CCNL2
CD276
CD44
CD59
CDH11
CDH6
CDK5RAP3
CELF3
CES3
CHGB
CHMP1B
CHODL
CHRNA7
CHST2
CHST8
CLSTN3
COL22A1
COL5A2
COL6A1
COL9A2
COTL1
CPT1A
CPT1C
CPXM1
CRABP2
CREB3L4
CREG1
CTHRC1
CTSL1
CTSO
CUL7
CUX2
CYFIP2
CYLD
CYP2U1
CYTH1
CYTH2
CYTH3
DAAM1
DCAF5
DCAF8
DCHS1
DCX
DDR1
DENND3
DEPTOR
DFNA5
DGAT2
DGKB
DGKI
DKK1
DLG4
DLL3
DNAH10
DNAJB2
DNAJB5
DOCK5
DSE
DST
DUSP10
DUSP2
DUSP26
DUSP6
DYRK1B
EBF4
EDNRA
EEF1A2
EEF2
EFEMP2
EFNA1
EFNA3
EGFLAM
EHHADH
EIF4A2
ELMO1
ELMO2
EMID1
EMILIN2
EML2
ENC1
ENGASE
ENPP2
EPHX2
ERMP1
EVI5L
EXOC3L1
FAM123C
FAM134B
FAM174B
FAM210B
FAM214B
FAT4
FBN1
FBRS
FBXO32
FGFR1
FGFR3
FIG4
FILIP1L
FKBP10
FKBP1B
FLNA
FMN1
FN1
FNDC5
FOXC1
FOXO3
FRY
FSIP2
FUCA1
FZD4
FZD5
GAA
GAB2
GALNT10
GALT
GARNL3
GCH1
GDAP1
GDAP1L1
GDF11
GLRX
GNG2
GNPTAB
GNS
GOLGA8B
GOLGB1
GPC2
GPER
GPR155
GPR173
GPR176
GPRASP1
GRHL1
GRIP2
GSN
GSTK1
GULP1
GXYLT2
H19
HBP1
HDAC6
HEATR5B
HECA
HECTD2
HECW2
HERC2P2
HEXDC
HEY1
HIP1R
HOMER3
HOMEZ
HOOK2
HOXD13
HR
ICA1
ID4
IDS
IDUA
IFI27L2
IFI30
IGF2R
IGFBP3
IGFBP5
IL13RA1
IL17RD
ING4
INSRR
IP6K2
IRF9
ISLR2
ISYNA1
ITGA1
ITGA3
ITGA6
ITGA7
ITGB5
JAK1
JAK3
JHDM1D
JUP
KCNH3
KCNQ1OT1
KCTD12
KCTD16
KDM4A
KDM5B
KIAA0513
KIAA0913
KIAA1024
KIAA1324L
KIAA1467
KIAA1671
KIF13B
KIFAP3
KLC4
KLF9
KLHDC8A
KLHDC8B
KLHL24
KSR1
L3MBTL1
LACC1
LACTB
LAMC1
LAYN
LGALS3
LGALS3BP
LMBR1L
LMO4
LOC100130417
LOC100131434
LOC100134229
LOC100499467
LOC100505761
LOC146880
LOC155060
LOC339290
LOC375190
LOC375295
LOC388849
LOC642852
LOC728392
LOC729177
LONRF2
LOXL1
LOXL4
LPPR4
LRP1
LRRC17
LRRC4C
LRRN2
LTBP4
LUM
LYRM1
MADD
MAGED2
MALAT1
MAP3K12
MAP6
MAPK10
MAPKAPK2
MAPRE3
MAPT
MARCH9
MATN2
MBNL2
MCAM
MCF2L2
MDGA1
MECOM
MFGE8
MFI2
MFSD10
MFSD6
MGC21881
MIAT
MICAL1
MIR100HG
MIR5047
MMP11
MMP2
MOAP1
MRC2
MSX1
MSX2
MTMR3
MXD4
MXRA8
MYLIP
MYLK
MYO15B
MYO18A
MYO6
NAP1L5
NAT1
NAV1
NAV2
NBR1
NCALD
[truncated: 270 more rows]
